# Supplementary material for: Ethylene Signaling Is Required for Fully Functional Tension Wood in Hybrid Aspen
Source: Front Plant Sci. 2019 Sep 26;10:1101. doi: 10.3389/fpls.2019.01101 (PMC6775489; doi:10.3389/fpls.2019.01101)
Supplement: Supplementary file 3 [file DataSheet_2.xlsx]

## Sheet: Sheet1
Differentially expressed genes in TW vs NW in wild type (WT) and pLMX5::etr1-1. S1: Gene list of DRGs identified in TW compared to NW in wild type trees. S2: Gene list of DRGs identified in TW compared to NW in pLMX5::etr1-1 trees. S3: Gene list of genes whose expression is controlled by ethylene during TW formation. S4: GO/PFAM enrichment of ET-dependent genes. S5: Selected ET-DRGs shown in Figu…

## Sheet: S1
S1: Gene list of DRGs identified in TW compared to NW in wild type trees.
DRGs (pAdj<0.05; lo2FC<0.5>) in WT (Nw vs. TW)
id	baseMean	baseMeanA	baseMeanB	foldChange	log2FoldChange	pval	padj	BestHitPotri
Potra001784g14503	49.1979	97.7105	0.685179	0.00701234	-7.15589	1.52568e-10	2.6396e-09	Potri.007G068300
Potra198814g29359	11.5393	22.9077	0.170974	0.00746361	-7.06591	4.89768e-06	4.15142e-05	Potri.003G206000
Potra001655g13591	728.915	1445.71	12.1201	0.0083835	-6.89823	1.82867e-10	3.11726e-09	Potri.001G226200
Potra195780g29065	20.4838	40.6257	0.341949	0.00841706	-6.89247	5.72116e-23	3.09466e-21	Potri.003G191200
Potra000680g05272	9.76449	19.358	0.170974	0.00883223	-6.82301	2.30382e-09	3.38011e-08	Potri.001G180600
Potra004030g24345	19.4289	38.5159	0.341949	0.00887812	-6.81553	6.80538e-25	4.24238e-23	Potri.001G118400
Potra000173g31166	16.4888	32.687	0.290699	0.00889342	-6.81305	4.81357e-05	0.000336514	Potri.001G401800
Potra003978g23934	8.40277	16.6346	0.170974	0.0102783	-6.60426	0.00608607	0.0244242	Potri.009G163600
Potra000612g04649	8.35902	16.5471	0.170974	0.0103326	-6.59665	1.90977e-11	3.69243e-10	Potri.016G101200
Potra000526g03613	29.4916	58.2309	0.752372	0.0129205	-6.27419	4.93289e-36	5.963e-34	Potri.004G002500
Potra000927g07531	86.9867	171.561	2.41215	0.01406	-6.15226	1.26271e-13	3.06131e-12	Potri.007G100100
Potra000869g33442	5.36017	10.5494	0.170974	0.0162071	-5.94723	2.54569e-07	2.7412e-06	Potri.002G217800
Potra001790g14530	47.2664	92.9402	1.59258	0.0171356	-5.86686	2.62773e-09	3.83109e-08	Potri.002G054300
Potra009826g26439	9.59153	18.7886	0.394481	0.0209958	-5.57376	8.0796e-12	1.62663e-10	Potri.014G016700
Potra001926g15273	114.197	223.276	5.11842	0.0229242	-5.44699	1.26232e-16	4.11929e-15	Potri.016G103500
Potra001200g30653	25.4206	49.6784	1.16279	0.0234064	-5.41695	8.76908e-07	8.53665e-06	Potri.014G034500
Potra008558g26183	3.71048	7.24998	0.170974	0.0235827	-5.40613	0.000114189	0.000733548	Potri.003G029400
Potra001089g09466	5.87705	11.4634	0.290699	0.0253588	-5.30137	1.1292e-06	1.07924e-05	Potri.001G127700
Potra000449g02531	54.337	105.869	2.80535	0.0264984	-5.23795	2.58214e-11	4.91049e-10	Potri.010G023600
Potra151473g26686	6.15309	11.9642	0.341949	0.0285809	-5.12881	9.60053e-07	9.28753e-06	Potri.003G028200
Potra000395g01825	111.27	216.295	6.24462	0.0288709	-5.11424	2.18041e-12	4.62764e-11	Potri.014G056800
Potra004021g24300	2.97165	5.77232	0.170974	0.0296197	-5.0773	0.00577878	0.023363	Potri.001G101200
Potra004022g24317	120.443	233.718	7.16925	0.0306748	-5.0268	1.52601e-18	5.92566e-17	Potri.005G033500
Potra000187g00757	21.0018	40.7383	1.26529	0.0310591	-5.00884	8.05396e-06	6.58407e-05	Potri.002G037100
Potra195017g29007	2.79011	5.40925	0.170974	0.0316078	-4.98358	0.000844947	0.0043625	Potri.001G157500
Potra000430g02276	7.83197	15.151	0.512923	0.033854	-4.88453	1.06125e-06	1.01815e-05	Potri.004G132200
Potra003557g22016	2.58348	4.99598	0.170974	0.0342224	-4.86892	0.00134088	0.00656489	Potri.017G097500
Potra001199g10361	8.64872	16.716	0.581397	0.0347808	-4.84557	6.99867e-11	1.25863e-09	Potri.003G216600
Potra002279g17468	411.594	795.341	27.8466	0.0350122	-4.836	6.35191e-26	4.22493e-24	Potri.004G212900
Potra196698g33720	4.93224	9.52253	0.341949	0.0359094	-4.79949	4.82801e-05	0.000337185	#N/A
Potra007506g25981	151.305	291.918	10.6917	0.0366255	-4.77101	1.97415e-08	2.52936e-07	Potri.014G022900
Potra160621g26872	17.8406	34.2962	1.38502	0.040384	-4.63007	3.51299e-19	1.42586e-17	Potri.019G007600
Potra001118g09878	312.568	600.82	24.3165	0.0404722	-4.62692	5.42058e-16	1.67827e-14	Potri.015G087400
Potra001117g09854	2.11082	4.05067	0.170974	0.0422089	-4.56631	0.0141215	0.0495769	Potri.006G234900
Potra000439g35484	23.319	44.7389	1.89922	0.0424513	-4.55805	1.38536e-07	1.54439e-06	Potri.007G100100
Potra000551g03971	62.3066	119.41	5.20283	0.043571	-4.52049	1.20088e-19	5.05113e-18	Potri.014G092900
Potra000729g05731	4.6861	8.97771	0.394481	0.04394	-4.50832	0.00797671	0.0306745	Potri.014G019300
Potra001570g12988	2.01691	3.86284	0.170974	0.0442613	-4.49781	0.0115449	0.0419641	Potri.003G160400
Potra004507g25006	65.3245	125.102	5.54735	0.0443427	-4.49516	5.06113e-33	4.93735e-31	Potri.010G153400
Potra161135g26904	152.7	292.3	13.1	0.0448169	-4.47981	2.07105e-14	5.48395e-13	Potri.006G238500
Potra002228g17115	383.433	733.787	33.0796	0.0450807	-4.47135	2.30231e-108	3.55617e-105	Potri.002G071800
Potra003854g23174	5.8003	11.0877	0.512923	0.0462606	-4.43407	0.000186809	0.00114327	Potri.005G064700
Potra000687g33193	1.92929	3.6876	0.170974	0.0463647	-4.43083	0.0124585	0.0448335	Potri.006G097700
Potra000440g02417	13.7409	26.2324	1.24935	0.0476263	-4.3921	3.10568e-14	8.09252e-13	Potri.012G069800
Potra000178g00687	6.70538	12.7781	0.632647	0.0495102	-4.33613	1.57987e-07	1.74931e-06	Potri.001G042600
Potra161949g26981	161.71	308.12	15.301	0.0496592	-4.33179	1.91019e-47	4.05413e-45	Potri.008G191800
Potra003625g22203	191.798	365.287	18.3079	0.0501192	-4.31849	1.10103e-43	2.00079e-41	Potri.009G118800
Potra003644g22268	45.9541	87.437	4.47111	0.0511352	-4.28954	1.46396e-23	8.2897e-22	Potri.005G014300
Potra163381g27092	4.60706	8.75246	0.461673	0.0527478	-4.24474	8.97398e-05	0.000591521	Potri.002G167400
Potra000792g06278	25.8985	49.1967	2.60035	0.0528561	-4.24179	3.91493e-26	2.64192e-24	Potri.006G211000
Potra000441g02437	11.8338	22.4695	1.1981	0.0533213	-4.22915	0.0137889	0.0486329	Potri.015G127900
Potra010177g26513	52.0163	98.7626	5.27002	0.0533606	-4.22808	1.07094e-16	3.51537e-15	Potri.003G176800
Potra007792g26029	359.81	682.223	37.3971	0.0548166	-4.18924	2.44309e-34	2.63276e-32	Potri.018G014900
Potra199816g29441	4255.03	8064.17	445.891	0.0552929	-4.17676	1.00168e-30	8.59561e-29	Potri.016G104300
Potra001421g12029	80.895	153.249	8.54089	0.0557321	-4.16535	4.59684e-07	4.72305e-06	Potri.009G114400
Potra196048g29079	4.36599	8.27031	0.461673	0.0558229	-4.163	0.00410211	0.0174339	Potri.016G016700
Potra199679g29426	3.19176	6.04157	0.341949	0.0565993	-4.14307	0.00218663	0.0100587	Potri.T064000
Potra010284g26551	28.3564	53.6667	3.04608	0.0567592	-4.139	4.60705e-21	2.21609e-19	Potri.013G079700
Potra002256g17336	10.173	19.2517	1.09432	0.0568428	-4.13688	2.23635e-10	3.75014e-09	Potri.016G034800
Potra002412g18358	2472.85	4677.98	267.732	0.0572324	-4.12702	3.04112e-31	2.70135e-29	Potri.010G234100
Potra166111g27214	6.28644	11.889	0.683897	0.0575236	-4.1197	5.58271e-07	5.65039e-06	Potri.013G125000
Potra003397g21551	340.687	644.147	37.227	0.0577927	-4.11297	1.46709e-07	1.62832e-06	Potri.001G235500
Potra000802g06352	8.26392	15.6204	0.907404	0.0580908	-4.10555	8.13099e-09	1.11472e-07	Potri.010G202900
Potra003652g22310	12.2063	23.0582	1.35442	0.0587391	-4.08954	1.07918e-12	2.37564e-11	Potri.017G114200
Potra003846g23122	32.8794	61.9617	3.79717	0.0612825	-4.02838	0.000664235	0.00352909	Potri.016G057400
Potra000445g02484	9.45612	17.8179	1.09432	0.0614169	-4.02522	1.10235e-09	1.68863e-08	Potri.010G054100
Potra002387g18178	2.50248	4.71426	0.290699	0.0616637	-4.01944	0.00460449	0.0192134	Potri.005G232300
Potra002148g16617	3.95598	7.45028	0.461673	0.0619672	-4.01235	9.65741e-05	0.000631628	Potri.002G041700
Potra001380g11778	18.5318	34.8909	2.1727	0.0622712	-4.00529	9.57806e-11	1.68971e-09	Potri.002G190600
Potra001609g13264	191.949	361.161	22.7363	0.0629534	-3.98957	2.37436e-46	4.78365e-44	Potri.004G099100
Potra000760g05998	4.73097	8.89648	0.565455	0.0635594	-3.97575	0.000155176	0.00096691	Potri.003G216500
Potra001459g12270	5.25599	9.87934	0.632647	0.0640374	-3.96494	0.000432885	0.00241823	Potri.001G100200
Potra002287g17521	151.55	284.767	18.332	0.0643753	-3.95735	1.94719e-08	2.49828e-07	Potri.005G208500
Potra001436g12093	33.9969	63.8719	4.12189	0.0645337	-3.9538	4.28444e-08	5.25222e-07	Potri.014G041000
Potra002641g19638	12.8267	24.0974	1.55599	0.064571	-3.95297	1.79452e-10	3.0628e-09	Potri.002G034300
Potra002538g19121	12.1788	22.8701	1.48752	0.0650422	-3.94248	2.90342e-06	2.56837e-05	Potri.002G178500
Potra000220g00906	20.5722	38.6285	2.51593	0.0651314	-3.9405	9.26648e-19	3.6596e-17	Potri.016G068200
Potra001178g10210	4.07859	7.64426	0.512923	0.0670991	-3.89756	0.000313279	0.00180745	Potri.012G140200
Potra000573g04253	37.8475	70.8646	4.83028	0.0681621	-3.87489	3.75352e-10	6.1136e-09	Potri.011G129700
Potra003243g21117	10.1422	18.9825	1.30188	0.0685836	-3.86599	1.02276e-09	1.57627e-08	Potri.008G045100
Potra189637g28707	325.547	609.111	41.9832	0.0689254	-3.85882	6.24767e-21	2.97438e-19	Potri.004G144600
Potra000786g33345	7.86981	14.7125	1.02713	0.0698133	-3.84035	0.00225916	0.0103547	Potri.005G038200
Potra001903g15115	5.58653	10.4366	0.736429	0.070562	-3.82497	5.34621e-05	0.000370213	Potri.015G019800
Potra003283g21229	3.47386	6.48605	0.461673	0.0711794	-3.8124	0.0114417	0.0416435	Potri.005G221400
Potra000980g08109	31.0106	57.8615	4.15976	0.0718917	-3.79803	4.48085e-26	3.01649e-24	Potri.009G112400
Potra001206g10421	39.2875	73.1499	5.42506	0.0741635	-3.75315	5.40386e-07	5.48935e-06	Potri.002G092900
Potra001474g30843	2.44049	4.53902	0.341949	0.0753353	-3.73053	0.00479348	0.0198975	Potri.018G022600
Potra003736g22630	16.1896	30.1014	2.27776	0.0756696	-3.72414	3.5074e-06	3.05981e-05	Potri.009G134700
Potra004044g24375	36.7657	68.3479	5.18347	0.0758395	-3.72091	5.5848e-05	0.000385038	Potri.003G143300
Potra002410g18334	11.2423	20.892	1.59258	0.0762293	-3.71351	2.88182e-11	5.43945e-10	Potri.018G141200
Potra001016g08474	81.5243	151.465	11.5831	0.0764737	-3.70889	1.97507e-51	5.43693e-49	Potri.002G073500
Potra000997g08284	49.0206	91.0429	6.99827	0.0768679	-3.70148	3.0308e-15	8.74122e-14	Potri.010G209400
Potra009289g26325	12.4208	23.0269	1.81481	0.0788126	-3.66543	2.38339e-10	3.97514e-09	Potri.003G028200
Potra155543g26770	3.90312	7.22485	0.581397	0.0804719	-3.63537	0.000461494	0.00255666	Potri.002G247600
Potra003422g32179	4.56853	8.45188	0.685179	0.0810683	-3.62472	6.44386e-05	0.000438362	Potri.013G126500
Potra003161g20874	4.1917	7.75074	0.632647	0.0816241	-3.61486	0.000461455	0.00255666	Potri.006G069800
Potra003887g23344	121.831	225.198	18.4651	0.081995	-3.60832	6.97727e-73	3.66017e-70	Potri.016G071000
Potra000513g03387	18.366	33.9267	2.80535	0.0826884	-3.59617	3.85118e-13	8.87111e-12	Potri.015G063500
Potra003586g22096	9.54207	17.6113	1.47286	0.0836316	-3.57981	3.19549e-08	3.98226e-07	Potri.002G094500
Potra000997g08286	24.1029	44.4758	3.72997	0.0838652	-3.57578	0.000125366	0.000796514	Potri.010G209200
Potra009351g26341	12.9166	23.8156	2.01767	0.0847203	-3.56115	2.19919e-07	2.39031e-06	Potri.003G027600
Potra005189g25314	1.85453	3.41835	0.290699	0.0850405	-3.55571	0.0138978	0.0489549	#N/A
Potra003314g21314	13.7252	25.2618	2.18864	0.0866383	-3.52885	0.000319089	0.00183526	Potri.015G024200
Potra176308g27875	10.974	20.1844	1.76356	0.0873725	-3.51668	1.31345e-07	1.47072e-06	Potri.001G379400
Potra002838g20091	13.0013	23.897	2.10551	0.0881075	-3.50459	1.06068e-09	1.63109e-08	Potri.016G020000
Potra001069g09226	105.017	192.573	17.4612	0.0906732	-3.46318	4.37471e-11	8.07637e-10	Potri.001G299500
Potra001929g15287	9.25956	16.9791	1.54005	0.0907029	-3.46271	1.35499e-07	1.51357e-06	Potri.013G153400
Potra000633g04834	10.3735	19.02	1.72697	0.0907975	-3.4612	6.08157e-07	6.09978e-06	Potri.004G100400
Potra003883g23318	64.8303	118.865	10.7954	0.0908209	-3.46083	1.38673e-07	1.5453e-06	Potri.009G061100
Potra000532g03709	733.252	1343.58	122.922	0.0914881	-3.45027	5.39565e-10	8.59686e-09	Potri.013G007900
Potra001477g12369	81.5639	149.406	13.7218	0.0918424	-3.4447	6.8233e-38	9.16465e-36	Potri.001G082400
Potra004017g24249	154.121	281.963	26.2791	0.0932005	-3.42352	1.98458e-28	1.53698e-26	Potri.015G010500
Potra003384g21516	44.4675	81.3518	7.5831	0.0932136	-3.42332	1.57256e-27	1.16903e-25	Potri.019G001800
Potra003532g21925	11.0889	20.2785	1.89922	0.0936569	-3.41647	5.41575e-10	8.62394e-09	Potri.004G151000
Potra199575g29414	4.99841	9.14066	0.856154	0.0936644	-3.41636	5.33141e-05	0.000369465	Potri.003G206000
Potra001612g13285	528.827	966.959	90.6953	0.0937944	-3.41435	7.5697e-24	4.39374e-22	Potri.006G129900
Potra001741g14195	409.542	748.316	70.7669	0.0945682	-3.4025	1.03251e-37	1.36051e-35	Potri.002G023900
Potra000803g06364	799.377	1460.56	138.192	0.0946159	-3.40177	2.13233e-135	7.41064e-132	Potri.009G042500
Potra002232g17149	130.831	238.853	22.8083	0.0954913	-3.38849	7.86252e-72	3.97457e-69	Potri.011G142700
Potra001320g11329	11.152	20.3534	1.95047	0.0958302	-3.38338	2.36272e-08	2.99849e-07	Potri.008G152300
Potra000372g01575	4.55583	8.30804	0.803622	0.0967282	-3.36992	0.000814572	0.00422603	Potri.002G052100
Potra000525g03578	263.811	480.979	46.6424	0.0969739	-3.36626	1.04043e-20	4.8212e-19	Potri.007G021400
Potra003647g22279	11.2215	20.4412	2.00172	0.097926	-3.35216	5.62695e-05	0.000387435	Potri.014G078000
Potra004230g24708	2.2038	4.01313	0.394481	0.0982976	-3.3467	0.0125287	0.0450685	Potri.017G062100
Potra000494g32768	13.2621	24.1473	2.37684	0.0984307	-3.34475	4.74199e-07	4.86141e-06	Potri.008G116700
Potra000602g04572	7.69822	14.0114	1.38502	0.0988493	-3.33863	2.15021e-06	1.9524e-05	Potri.005G210300
Potra001928g15286	27.1697	49.4405	4.89876	0.0990838	-3.33521	2.90733e-08	3.6411e-07	Potri.001G400100
Potra001777g14467	18.2204	33.1506	3.29023	0.0992512	-3.33277	1.55271e-15	4.58768e-14	Potri.005G201300
Potra001117g09861	16.1602	29.3941	2.92635	0.0995557	-3.32835	1.96949e-12	4.20567e-11	Potri.018G057100
Potra003842g23089	10.4668	19.0137	1.91987	0.100973	-3.30796	0.000374877	0.00212535	Potri.002G182700
Potra000132g00444	6.88709	12.5089	1.26529	0.101152	-3.30541	1.3369e-05	0.000104734	Potri.003G034700
Potra169811g27472	40.4775	73.4757	7.47931	0.101793	-3.29629	4.37917e-28	3.33573e-26	Potri.005G024200
Potra002841g20103	24.7329	44.8956	4.57019	0.101796	-3.29625	8.10614e-12	1.63079e-10	Potri.006G236200
Potra000365g01473	24.714	44.8578	4.57019	0.101882	-3.29504	4.33832e-08	5.31277e-07	Potri.004G007800
Potra001734g14122	54.1277	98.2429	10.0125	0.101915	-3.29456	7.42013e-16	2.26208e-14	Potri.014G076900
Potra009985g26462	3.40596	6.17926	0.632647	0.102382	-3.28796	0.00736433	0.0286725	Potri.016G066200
Potra000661g05097	306.343	555.707	56.9797	0.102536	-3.2858	3.9786e-32	3.63872e-30	Potri.002G168200
Potra000941g07701	10.1073	18.3313	1.88328	0.102736	-3.28299	0.00050016	0.00274767	Potri.003G108100
Potra001843g14799	6.14173	11.1379	1.14557	0.102854	-3.28134	3.48229e-05	0.000250889	Potri.017G135100
Potra163736g27118	160.928	291.574	30.2828	0.10386	-3.26729	4.83462e-34	5.07234e-32	Potri.011G146900
Potra002860g20170	18.2958	33.1377	3.45394	0.10423	-3.26216	3.88734e-06	3.36382e-05	Potri.019G083000
Potra000464g02730	2067.07	3742.62	391.518	0.104611	-3.2569	1.46674e-24	8.96261e-23	Potri.008G061800
Potra001078g30516	12.2804	22.2318	2.32901	0.10476	-3.25484	1.86031e-10	3.16538e-09	Potri.006G107200
Potra001958g15467	374.038	677.089	70.9861	0.10484	-3.25374	4.16546e-106	5.2642e-103	Potri.009G090700
Potra004009g24162	16.3266	29.5194	3.13392	0.106165	-3.23562	1.36442e-13	3.29295e-12	Potri.008G086000
Potra002920g20310	58.0405	104.855	11.2265	0.107067	-3.22341	1.70806e-22	9.02837e-21	Potri.014G117300
Potra185650g34219	5.39232	9.74158	1.04307	0.107074	-3.22332	0.00269269	0.0121036	Potri.010G109100
Potra000182g00732	116.114	209.552	22.6752	0.108208	-3.20812	5.72775e-14	1.44771e-12	Potri.008G142700
Potra198261g29299	3.76463	6.79284	0.736429	0.108413	-3.2054	0.00155815	0.0074679	Potri.014G025600
Potra000955g07838	337.795	609.134	66.4559	0.109099	-3.19629	2.7151e-07	2.91459e-06	Potri.005G176100
Potra001740g14180	547.911	987.927	107.894	0.109213	-3.19478	2.69271e-19	1.09935e-17	Potri.010G069000
Potra004222g24700	322.797	581.737	63.8568	0.109769	-3.18746	4.45258e-21	2.1455e-19	Potri.006G036200
Potra004413g24898	72.6733	130.886	14.4604	0.11048	-3.17814	1.12773e-40	1.83358e-38	Potri.002G111700
Potra159636g26832	3.43222	6.17926	0.685179	0.110884	-3.17288	0.00307014	0.0135491	Potri.003G013200
Potra000514g03401	162.847	292.875	32.8195	0.11206	-3.15766	2.13376e-22	1.12358e-20	Potri.004G043500
Potra002313g17641	185.705	333.94	37.4702	0.112206	-3.15577	8.35702e-38	1.10643e-35	Potri.005G116600
Potra002161g16699	235.021	422.523	47.5202	0.112468	-3.15242	6.55023e-13	1.47822e-11	Potri.006G092000
Potra001342g11491	900.979	1619.52	182.442	0.112652	-3.15006	6.43825e-132	1.79003e-128	Potri.010G249600
Potra001094g09525	59.2936	106.563	12.0241	0.112836	-3.1477	6.67237e-07	6.63728e-06	Potri.001G277600
Potra001844g14801	655.118	1177.11	133.123	0.113093	-3.14442	1.96833e-29	1.59549e-27	Potri.017G074000
Potra002606g19556	16.9342	30.4144	3.45394	0.113562	-3.13844	3.66577e-07	3.85183e-06	Potri.001G092700
Potra000376g01610	9.22458	16.5659	1.88328	0.113684	-3.13689	1.09876e-07	1.24791e-06	Potri.006G144100
Potra003576g32273	4.77649	8.5771	0.975878	0.113777	-3.13572	6.12421e-05	0.000418769	Potri.012G054000
Potra002232g17150	30.9425	55.5513	6.33374	0.114016	-3.13269	6.73383e-09	9.36104e-08	Potri.011G142500
Potra001507g12582	35.888	64.404	7.37211	0.114467	-3.127	8.51469e-23	4.57015e-21	Potri.014G074500
Potra002472g18709	2957.11	5306.43	607.782	0.114537	-3.12612	6.2309e-82	4.02879e-79	Potri.002G005700
Potra001033g08689	2.74318	4.9209	0.565455	0.114909	-3.12144	0.00696683	0.0273162	Potri.017G119200
Potra000247g00980	18.5684	33.2884	3.84842	0.115608	-3.11268	9.3381e-13	2.07536e-11	Potri.009G085600
Potra002765g19935	30.3107	54.3243	6.29715	0.115918	-3.10883	4.07797e-20	1.79115e-18	Potri.002G065400
Potra000710g34723	32.3416	57.9365	6.74673	0.11645	-3.10221	2.4933e-23	1.3892e-21	Potri.011G146900
Potra002104g16364	22.6934	40.6443	4.74244	0.116681	-3.09935	1.53129e-10	2.64767e-09	Potri.008G164500
Potra001103g09626	3.59107	6.42977	0.752372	0.117014	-3.09525	0.00356814	0.0154284	Potri.018G152200
Potra000178g00690	85.6017	153.1	18.1038	0.118248	-3.08011	1.30827e-36	1.63846e-34	Potri.001G042200
Potra002187g16844	6.29527	11.2568	1.33377	0.118486	-3.07721	7.28963e-05	0.000490263	Potri.010G096800
Potra001900g15102	3.77946	6.75529	0.803622	0.118962	-3.07143	0.00413047	0.0175354	Potri.001G336700
Potra003260g21148	78.8197	140.872	16.7674	0.119026	-3.07065	1.97311e-17	6.84019e-16	Potri.005G167800
Potra000847g06848	5.91981	10.5743	1.26529	0.119657	-3.06302	5.06223e-05	0.000352304	Potri.004G051700
Potra001203g10389	2.63678	4.70811	0.565455	0.120102	-3.05767	0.00671506	0.026531	Potri.006G266600
Potra000351g01291	5.09866	9.103	1.09432	0.120215	-3.05631	0.00124731	0.00614874	Potri.006G017700
Potra001018g08495	321.901	574.498	69.303	0.120632	-3.05131	1.67886e-39	2.53682e-37	Potri.010G112800
Potra002082g16233	6.83753	12.2022	1.47286	0.120704	-3.05045	1.01132e-05	8.09842e-05	Potri.010G221900
Potra000766g06052	43.3314	77.3195	9.34323	0.120839	-3.04884	4.09279e-07	4.25517e-06	Potri.015G083200
Potra000682g05282	12.9338	23.077	2.79069	0.120929	-3.04776	3.35606e-08	4.17115e-07	Potri.006G179000
Potra002581g19409	4.50046	8.02632	0.974596	0.121425	-3.04186	0.00108413	0.00543294	Potri.005G063700
Potra002499g18883	122.305	218.123	26.4879	0.121436	-3.04173	3.41001e-16	1.07371e-14	Potri.005G192100
Potra002758g19915	2849.41	5077.73	621.092	0.122317	-3.03131	3.51417e-84	2.38303e-81	Potri.013G130400
Potra007207g34632	23.0334	41.0202	5.04652	0.123025	-3.02298	3.21183e-06	2.82055e-05	Potri.001G212900
Potra000466g02778	41.1747	73.3128	9.03659	0.123261	-3.02021	0.000302038	0.00174986	Potri.017G038100
Potra004000g24086	7.55075	13.4417	1.65978	0.123479	-3.01766	6.0519e-05	0.000414334	Potri.005G172400
Potra003390g21532	7.52257	13.3854	1.65978	0.123999	-3.0116	1.34714e-05	0.000105387	Potri.014G167700
Potra002586g19438	30.714	54.6373	6.79071	0.124287	-3.00825	1.37679e-15	4.10717e-14	Potri.014G038700
Potra001164g10105	431.42	766.856	95.984	0.125166	-2.99809	4.1953e-51	1.13244e-48	Potri.005G082000
Potra001717g13978	4.07553	7.24365	0.907404	0.125269	-2.9969	0.00320316	0.0140637	Potri.004G178600
Potra003902g23429	36.9302	65.5933	8.26699	0.126034	-2.98811	8.98178e-12	1.79268e-10	Potri.001G467300
Potra002122g16460	6651.74	11811.1	1492.34	0.12635	-2.9845	1.47157e-122	3.14724e-119	Potri.005G117500
Potra001089g09468	217.972	386.999	48.9457	0.126475	-2.98308	2.4412e-40	3.83461e-38	Potri.001G128100
Potra000561g04064	165.54	293.676	37.4044	0.127366	-2.97295	3.25147e-09	4.69369e-08	Potri.018G044100
Potra000024g00118	44.3662	78.6847	10.0478	0.127697	-2.96921	7.85202e-06	6.43412e-05	Potri.010G034700
Potra001741g14196	5.78958	10.2613	1.31783	0.128427	-2.96098	0.000201549	0.00122324	Potri.002G024000
Potra002386g18172	943.983	1672.18	215.783	0.129043	-2.95408	3.28446e-33	3.24975e-31	Potri.014G074600
Potra003981g23963	5.82256	10.3113	1.33377	0.12935	-2.95065	0.00121502	0.00601198	Potri.014G034800
Potra003956g23750	125.686	222.468	28.9035	0.129922	-2.94428	2.21624e-57	7.60716e-55	Potri.017G085000
Potra001064g09144	31.9174	56.4592	7.37553	0.130635	-2.93639	2.95611e-18	1.12587e-16	Potri.015G001300
Potra194020g31503	4.65874	8.2391	1.07838	0.130885	-2.93362	0.000652027	0.00347153	Potri.001G302800
Potra003469g21770	36.9917	65.4118	8.57149	0.131039	-2.93193	9.37847e-23	5.02408e-21	Potri.005G116800
Potra179677g28038	56.816	100.453	13.1791	0.131197	-2.93019	7.24468e-30	5.95928e-28	Potri.010G011700
Potra197674g29244	36.3828	64.3104	8.45519	0.131475	-2.92714	3.203e-20	1.42257e-18	Potri.002G224100
Potra004419g24903	319.562	564.427	74.6963	0.13234	-2.91768	5.19141e-07	5.289e-06	Potri.001G213500
Potra002247g17258	56.4956	99.7836	13.2076	0.132362	-2.91744	3.04733e-11	5.73239e-10	Potri.008G155900
Potra004103g24506	6.36655	11.2443	1.4888	0.132405	-2.91697	7.064e-05	0.0004767	Potri.011G059400
Potra000475g02877	3.11668	5.49693	0.736429	0.133971	-2.90001	0.00340021	0.0147805	Potri.012G019900
Potra000353g32240	81.2344	143.189	19.28	0.134647	-2.89274	5.12473e-20	2.23678e-18	Potri.003G172100
Potra002199g16931	6.0366	10.6369	1.43627	0.135027	-2.88868	8.51796e-05	0.000564089	Potri.010G162300
Potra000819g06527	26.3171	46.3542	6.27993	0.135477	-2.88388	3.62853e-14	9.39329e-13	Potri.010G135200
Potra002877g20209	1713.83	3018.5	409.16	0.135551	-2.88309	8.56962e-148	4.76522e-144	Potri.005G141600
Potra001655g13592	158.575	279.196	37.9552	0.135945	-2.87891	4.38657e-07	4.53046e-06	Potri.001G226000
Potra001819g14682	105.816	186.25	25.3819	0.136279	-2.87536	1.17686e-33	1.20739e-31	Potri.007G126600
Potra000573g04262	17.127	30.1454	4.10851	0.13629	-2.87525	1.18304e-11	2.33112e-10	Potri.001G412200
Potra169381g31122	13.258	23.3149	3.20111	0.137299	-2.86461	5.9059e-10	9.34025e-09	Potri.002G017500
Potra194020g31502	3.11212	5.47186	0.752372	0.137498	-2.86251	0.00507981	0.0209297	#N/A
Potra002932g20336	48.7997	85.7721	11.8273	0.137892	-2.85839	1.31536e-14	3.54368e-13	Potri.016G082800
Potra001488g12419	20.9568	36.8318	5.08183	0.137974	-2.85753	6.57884e-12	1.33707e-10	Potri.001G306000
Potra010034g35580	6.75768	11.8702	1.64512	0.138592	-2.85109	1.19189e-05	9.41158e-05	Potri.002G079500
Potra002551g19215	145.002	254.679	35.3255	0.138706	-2.8499	2.7818e-11	5.26855e-10	Potri.002G016200
Potra003155g20863	20.7475	36.4253	5.06973	0.139182	-2.84496	1.08637e-08	1.45844e-07	Potri.013G159200
Potra005602g25439	5.17167	9.07805	1.26529	0.13938	-2.84291	0.00221878	0.0101948	Potri.010G172800
Potra001002g08341	375.462	658.896	92.0287	0.139671	-2.8399	8.59121e-46	1.70615e-43	Potri.018G130300
Potra001493g12460	138.629	243.266	33.9922	0.139733	-2.83926	8.87462e-40	1.35572e-37	Potri.010G127000
Potra000919g07449	673.561	1181.58	165.538	0.140098	-2.83549	8.91325e-39	1.2774e-36	Potri.002G079400
Potra007259g25924	70.8996	124.2	17.5994	0.141702	-2.81906	6.65993e-18	2.41731e-16	Potri.001G213200
Potra000572g04250	3.03074	5.3091	0.752372	0.141714	-2.81895	0.00281905	0.0125848	Potri.009G140800
Potra001174g10173	528.431	925.294	131.568	0.142191	-2.8141	2.45159e-11	4.67501e-10	Potri.003G192500
Potra000595g04518	5.25425	9.19068	1.31783	0.143387	-2.80201	0.000595163	0.00320268	Potri.003G099800
Potra000967g07959	74.698	130.661	18.7351	0.143388	-2.80201	6.17271e-13	1.39869e-11	Potri.001G471100
Potra002688g19756	218.955	382.981	54.9299	0.143427	-2.80161	2.8082e-75	1.5934e-72	Potri.005G255400
Potra004001g24088	220.148	385.065	55.2311	0.143433	-2.80155	1.10225e-38	1.55562e-36	Potri.004G214700
Potra000199g00863	5.72041	10.0046	1.43627	0.143561	-2.80026	0.000661753	0.0035174	Potri.006G099100
Potra000924g07480	4.99951	8.73372	1.26529	0.144875	-2.78712	0.0011723	0.00582442	Potri.T108900
Potra000526g03617	22.1226	38.6286	5.61668	0.145402	-2.78188	3.53477e-13	8.16933e-12	Potri.004G001900
Potra003038g20591	28.1414	49.0963	7.18647	0.146375	-2.77226	8.66535e-10	1.34971e-08	Potri.005G216400
Potra000611g04646	2004.47	3493.39	515.562	0.147582	-2.76041	1.93652e-106	2.69206e-103	Potri.016G091100
Potra001620g13327	36.277	63.2081	9.34579	0.147857	-2.75772	5.02491e-22	2.58718e-20	Potri.001G144700
Potra183383g28300	11.7452	20.4602	3.03013	0.148099	-2.75537	5.84796e-08	6.99918e-07	Potri.001G231500
Potra001505g12550	8.22296	14.3245	2.12145	0.1481	-2.75536	5.10879e-05	0.000355277	Potri.008G142700
Potra178904g27979	5.56459	9.69162	1.43755	0.148329	-2.75312	0.000199416	0.00121189	Potri.010G153600
Potra000881g33690	4.89619	8.52708	1.26529	0.148385	-2.75258	0.00120806	0.00598285	Potri.016G130700
Potra003028g20565	17.0348	29.657	4.41259	0.148787	-2.74868	1.68684e-07	1.86256e-06	Potri.005G091700
Potra000299g01090	932.421	1623.02	241.818	0.148992	-2.74669	1.17787e-134	3.63869e-131	Potri.001G000800
Potra001643g31045	10.2223	17.7929	2.6516	0.149025	-2.74637	4.20563e-05	0.000298137	Potri.007G041900
Potra001328g11412	4.34067	7.55044	1.13091	0.149781	-2.73908	0.000610972	0.00327363	Potri.001G310000
Potra169402g27438	5.30978	9.23455	1.38502	0.149982	-2.73714	0.000488088	0.00268719	Potri.005G219600
Potra000927g07548	12.8625	22.3382	3.38674	0.151612	-2.72154	4.60811e-08	5.61435e-07	Potri.007G102100
Potra003395g21547	20.1458	34.9849	5.30661	0.151683	-2.72087	2.10671e-11	4.0423e-10	Potri.019G031600
Potra002336g17857	36.1227	62.6945	9.55079	0.152339	-2.71465	3.3714e-11	6.3249e-10	Potri.009G003300
Potra003144g20842	1359.94	2360.29	359.601	0.152355	-2.71449	1.4018e-15	4.17729e-14	Potri.010G196300
Potra001152g10024	10.088	17.505	2.67096	0.152583	-2.71233	1.02832e-06	9.89283e-06	Potri.017G097800
Potra001967g34311	7.78416	13.4981	2.0702	0.153369	-2.70492	4.77824e-05	0.000334213	#N/A
Potra001746g14232	21.3887	37.0822	5.69511	0.153581	-2.70293	9.50065e-08	1.09151e-06	Potri.001G070900
Potra001033g08671	5.80537	10.0548	1.55599	0.154752	-2.69197	0.00027027	0.0015863	Potri.006G241400
Potra000665g05146	77.4425	134.042	20.8432	0.155498	-2.68503	3.75875e-35	4.30059e-33	Potri.011G148600
Potra002678g19729	650.078	1124.51	175.646	0.156198	-2.67856	4.96184e-07	5.06811e-06	Potri.019G034800
Potra000340g01171	37.8312	65.4117	10.2506	0.156709	-2.67384	3.01845e-14	7.88741e-13	Potri.012G059500
Potra162822g27041	38.6169	66.7644	10.4694	0.156812	-2.6729	8.972e-22	4.48649e-20	Potri.013G062000
Potra000627g04787	32.3752	55.9705	8.77992	0.156867	-2.67239	1.74837e-09	2.59529e-08	Potri.017G125300
Potra000341g01173	4.03436	6.97441	1.09432	0.156905	-2.67204	0.00526162	0.0215702	Potri.005G124000
Potra000190g00789	41.8022	72.2363	11.3682	0.157375	-2.66772	6.41395e-24	3.76217e-22	Potri.010G225300
Potra001042g08819	151.53	261.773	41.2867	0.15772	-2.66457	9.90195e-30	8.09718e-28	#N/A
Potra000945g07744	524.442	905.754	143.13	0.158023	-2.66179	3.51221e-18	1.32138e-16	Potri.018G100300
Potra000154g00549	178.009	307.419	48.6003	0.158092	-2.66117	2.89496e-15	8.38423e-14	Potri.019G067500
Potra000573g04261	11.0295	19.0449	3.01419	0.158268	-2.65956	1.24807e-05	9.8189e-05	Potri.001G412100
Potra006306g25646	2712.24	4681.53	742.956	0.158699	-2.65563	1.88772e-110	3.28027e-107	Potri.006G087100
Potra002884g20227	23.7314	40.9262	6.5366	0.159717	-2.64641	6.39356e-07	6.37819e-06	Potri.015G078200
Potra000132g00443	16.1177	27.7849	4.45046	0.160175	-2.64228	7.28288e-06	5.99426e-05	Potri.003G034700
Potra002588g19459	57.7056	99.4389	15.9724	0.160625	-2.63823	2.60874e-16	8.27977e-15	Potri.011G022800
Potra001458g12261	25.7029	44.2696	7.13608	0.161196	-2.63311	1.74199e-13	4.16087e-12	Potri.002G205300
Potra006337g25656	16.8086	28.9433	4.67397	0.161487	-2.63051	5.83835e-08	6.99369e-07	Potri.010G172800
Potra007433g25958	5.57997	9.60394	1.55599	0.162016	-2.62579	0.000676922	0.00358964	Potri.T004600
Potra001178g10216	2293.6	3947.02	640.179	0.162193	-2.62422	1.83215e-17	6.40746e-16	Potri.012G140800
Potra001067g09194	926.072	1593.63	258.51	0.162214	-2.62403	1.18612e-128	2.99798e-125	Potri.016G025500
Potra003816g22972	125.288	215.556	35.0201	0.162464	-2.62181	1.15564e-19	4.86821e-18	Potri.005G111700
Potra003717g22542	4.70021	8.0826	1.31783	0.163045	-2.61666	0.00154311	0.00740728	Potri.008G070400
Potra176450g27885	148.031	254.51	41.5516	0.163261	-2.61475	7.36567e-22	3.7302e-20	Potri.011G155600
Potra000991g08202	54.4852	93.6353	15.335	0.163774	-2.61022	5.8698e-14	1.48093e-12	Potri.006G085900
Potra002535g19101	166.854	286.734	46.9737	0.163823	-2.60979	3.98381e-48	9.00504e-46	Potri.015G137900
Potra001022g08543	5.69699	9.78545	1.60853	0.164379	-2.6049	0.0025759	0.0116471	Potri.008G156800
Potra000082g00290	60.0175	103.051	16.9836	0.164807	-2.60115	6.86237e-30	5.67841e-28	Potri.002G249700
Potra001149g10016	132.976	228.315	37.6364	0.164844	-2.60083	1.04801e-47	2.2764e-45	Potri.013G062000
Potra002240g17217	102.73	176.333	29.1274	0.165184	-2.59785	1.4341e-41	2.35931e-39	Potri.018G123000
Potra002041g15949	122.834	210.81	34.8573	0.165349	-2.59641	1.09657e-07	1.24593e-06	Potri.002G069400
Potra003791g22872	170.966	293.314	48.6171	0.165751	-2.59291	2.35076e-40	3.71354e-38	Potri.001G409900
Potra002234g31719	15.2426	26.1385	4.34668	0.166294	-2.58819	5.49098e-09	7.72991e-08	Potri.002G226300
Potra198817g29360	323.247	554.267	92.2274	0.166395	-2.58731	6.74915e-38	9.10906e-36	Potri.009G098700
Potra000433g02317	222.69	381.841	63.54	0.166404	-2.58724	8.08474e-21	3.78417e-19	Potri.015G062300
Potra000467g02785	34.3586	58.9126	9.80448	0.166424	-2.58706	7.03604e-07	6.95875e-06	Potri.003G146800
Potra002590g19477	114.37	196.036	32.7037	0.166825	-2.5836	1.7923e-28	1.39193e-26	Potri.001G454800
Potra001066g09176	75.8644	130.028	21.7007	0.166892	-2.58301	1.17e-10	2.0446e-09	Potri.011G154200
Potra000757g05971	248.703	426.211	71.195	0.167041	-2.58172	1.81899e-63	7.66262e-61	Potri.016G136400
Potra000672g05208	71.7382	122.891	20.5853	0.167508	-2.5777	3.42717e-27	2.46216e-25	Potri.017G133000
Potra002676g19724	8.5699	14.6751	2.46468	0.167949	-2.5739	1.77794e-05	0.000135457	Potri.008G113400
Potra000119g00391	1054.16	1805.04	303.281	0.168019	-2.57331	1.94787e-32	1.82961e-30	Potri.003G173100
Potra004247g24728	5.58746	9.5664	1.60853	0.168143	-2.57224	0.000971657	0.00493514	Potri.014G136200
Potra000167g00628	9.79121	16.7599	2.82257	0.168413	-2.56993	0.00398958	0.01701	Potri.016G054800
Potra164327g27165	14.0635	24.0724	4.0547	0.168438	-2.56971	7.68191e-07	7.54967e-06	Potri.004G054300
Potra199698g29428	228.899	391.519	66.2784	0.169285	-2.56247	7.67187e-24	4.43453e-22	Potri.004G019300
Potra000858g06948	93.2871	159.536	27.0387	0.169484	-2.56078	1.45865e-37	1.90398e-35	Potri.003G152500
Potra002232g17156	4.91283	8.38939	1.43627	0.171201	-2.54624	0.00689351	0.0271089	Potri.006G125000
Potra000492g03122	948.929	1619.94	277.922	0.171564	-2.54318	2.25265e-98	2.2368e-95	Potri.016G138600
Potra002187g16852	31.2955	53.4225	9.16841	0.171621	-2.5427	1.40791e-13	3.39497e-12	Potri.010G097700
Potra002170g16752	74.5911	127.312	21.8703	0.171786	-2.54132	5.35727e-31	4.66922e-29	Potri.016G024500
Potra003968g23831	11.0635	18.876	3.25108	0.172234	-2.53756	5.04855e-06	4.269e-05	Potri.003G057300
Potra003910g23472	7.78882	13.2852	2.29242	0.172554	-2.53488	0.000172739	0.00106655	Potri.018G124800
Potra000876g07061	59.4485	101.373	17.5237	0.172863	-2.5323	6.53221e-20	2.8245e-18	Potri.001G002200
Potra001952g15416	21.5916	36.8129	6.37033	0.173046	-2.53077	2.74085e-08	3.44657e-07	Potri.017G009600
Potra000927g07547	11.525	19.646	3.40397	0.173265	-2.52895	9.66804e-07	9.33984e-06	Potri.007G102300
Potra004013g24220	18.9143	32.2299	5.5986	0.173708	-2.52526	2.91277e-07	3.10758e-06	Potri.001G232500
Potra003784g22850	2746.88	4680.18	813.579	0.173835	-2.52421	2.02368e-144	9.37739e-141	Potri.005G256000
Potra152237g26704	265.048	451.478	78.6183	0.174135	-2.52172	2.4182e-25	1.55273e-23	Potri.008G087700
Potra008024g26081	572.984	975.935	170.033	0.174226	-2.52097	2.04411e-11	3.92759e-10	Potri.004G153200
Potra000682g05287	172.336	293.502	51.17	0.174343	-2.52	2.31618e-45	4.53499e-43	Potri.006G178300
Potra000771g06085	37.4362	63.7463	11.1262	0.174538	-2.51839	8.06836e-10	1.26025e-08	Potri.011G044500
Potra001542g12785	447.843	762.486	133.2	0.174692	-2.51711	7.98469e-55	2.52271e-52	Potri.007G014400
Potra001388g11813	70.6932	120.356	21.0301	0.174732	-2.51678	3.00309e-31	2.67612e-29	Potri.016G010900
Potra003723g32326	3.27395	5.57202	0.975878	0.175139	-2.51343	0.00640063	0.0254916	Potri.007G121000
Potra002128g16499	64.4918	109.75	19.2334	0.175247	-2.51254	1.65223e-20	7.49379e-19	Potri.002G068300
Potra001008g08390	871.581	1481.72	261.438	0.176442	-2.50273	1.1014e-26	7.65558e-25	Potri.002G033000
Potra003079g20688	14.7448	25.0551	4.43452	0.176991	-2.49826	1.08988e-06	1.0431e-05	Potri.017G137300
Potra003910g23470	101.794	172.946	30.6434	0.177185	-2.49667	5.43866e-23	2.96492e-21	Potri.018G124900
Potra003967g35859	10.0571	17.0854	3.02885	0.177277	-2.49592	0.000165272	0.00102477	#N/A
Potra001428g12064	336.417	571.485	101.35	0.177344	-2.49538	1.07585e-38	1.52612e-36	Potri.006G049200
Potra002819g20049	3.62742	6.16052	1.09432	0.177634	-2.49302	0.0035139	0.0152176	Potri.003G188500
Potra001572g34885	238.516	405.005	72.0266	0.177841	-2.49134	2.37996e-44	4.50136e-42	Potri.019G013000
Potra001760g14315	308.935	524.547	93.3233	0.177912	-2.49076	2.03862e-08	2.60717e-07	Potri.009G027300
Potra002984g20461	3412.45	5792.49	1032.41	0.178233	-2.48816	1.63365e-30	1.39326e-28	Potri.010G198800
Potra000659g05079	46.249	78.4967	14.0013	0.178367	-2.48708	9.83546e-21	4.5652e-19	Potri.008G041300
Potra001753g14287	111.281	188.873	33.6895	0.178371	-2.48704	4.90916e-09	6.95665e-08	Potri.003G167400
Potra000464g02710	2.82592	4.79568	0.856154	0.178526	-2.48579	0.00671358	0.026529	Potri.008G064000
Potra008025g26082	40.9692	69.4626	12.4759	0.179605	-2.4771	5.81105e-16	1.79317e-14	Potri.002G079700
Potra000571g33009	6.79181	11.5134	2.0702	0.179807	-2.47548	9.80183e-05	0.000638819	#N/A
Potra001107g09697	36.067	61.1297	11.0043	0.180015	-2.47381	1.16482e-18	4.57424e-17	Potri.001G023600
Potra002497g18859	293.09	496.736	89.4437	0.180063	-2.47343	8.25458e-24	4.7516e-22	Potri.006G226900
Potra186381g28436	206.79	350.342	63.2372	0.180501	-2.46992	8.05128e-12	1.6221e-10	Potri.015G128700
Potra001843g14800	17.2734	29.2561	5.29067	0.18084	-2.46722	0.000685285	0.00362983	Potri.017G135000
Potra009454g26363	4.29951	7.28119	1.31783	0.180991	-2.46601	0.00277776	0.0124344	Potri.001G352400
Potra000934g07628	352.429	596.795	108.062	0.18107	-2.46538	3.46415e-38	4.76801e-36	Potri.009G124500
Potra002292g17538	24.0674	40.7386	7.39618	0.181552	-2.46154	4.33755e-11	8.02375e-10	Potri.007G097000
Potra000544g03840	4.99913	8.45821	1.54005	0.182078	-2.45737	0.00158752	0.00759424	Potri.002G047500
Potra003628g22212	55.3867	93.7101	17.0633	0.182086	-2.45731	1.51844e-19	6.31051e-18	Potri.004G236500
Potra165170g27208	10.5421	17.8306	3.25364	0.182475	-2.45423	5.0565e-07	5.15912e-06	Potri.001G323600
Potra002116g16438	4.39091	7.41274	1.36908	0.184692	-2.4368	0.00442027	0.0185713	Potri.005G109500
Potra001055g09029	91.5882	154.614	28.562	0.18473	-2.43651	7.78574e-34	8.10738e-32	Potri.009G109500
Potra001572g13022	78.333	132.195	24.4707	0.18511	-2.43354	8.67769e-32	7.85882e-30	Potri.010G228500
Potra003601g22126	21.8963	36.9446	6.84795	0.185357	-2.43162	9.56626e-12	1.89979e-10	Potri.006G026200
Potra003005g20514	20.0887	33.8828	6.29459	0.185775	-2.42837	3.59592e-05	0.00025834	Potri.002G153400
Potra000527g03650	1271.51	2144.52	398.499	0.185822	-2.428	2.05737e-119	3.8134e-116	Potri.011G007600
Potra002108g16386	4.74816	8.00751	1.4888	0.185926	-2.4272	0.00184683	0.00866622	Potri.007G056700
Potra000710g05559	134.608	226.988	42.2286	0.186038	-2.42633	9.30835e-27	6.50252e-25	Potri.011G147000
Potra003538g21945	3.97166	6.69268	1.25063	0.186866	-2.41992	0.00368404	0.0158802	Potri.012G093200
Potra001175g10182	8.85436	14.9193	2.7894	0.186966	-2.41915	0.000190608	0.00116395	Potri.011G142100
Potra000008g00036	8.0181	13.5043	2.53187	0.187486	-2.41515	6.34816e-05	0.000432805	Potri.001G159200
Potra009668g33568	7.58707	12.7779	2.3962	0.187527	-2.41483	0.00635812	0.0253513	Potri.013G082400
Potra003408g21578	3.95225	6.65514	1.24935	0.187727	-2.41329	0.0121777	0.0439767	Potri.003G218800
Potra001300g11187	29.1923	49.1404	9.24415	0.188117	-2.4103	6.59532e-14	1.65945e-12	Potri.001G093900
Potra000507g03303	8.5293	14.3558	2.70285	0.188276	-2.40908	7.57928e-05	0.000507775	Potri.006G176700
Potra000785g06208	1476.46	2484.84	468.073	0.188371	-2.40835	4.99187e-122	9.91349e-119	Potri.006G109900
Potra006357g25663	15.1982	25.5687	4.82772	0.188814	-2.40496	5.11303e-07	5.21105e-06	Potri.001G463300
Potra001612g13284	22.575	37.9588	7.19118	0.189447	-2.40013	3.30373e-11	6.20633e-10	Potri.006G129800
Potra002248g17269	50.4373	84.7884	16.0861	0.189721	-2.39805	7.01918e-16	2.14455e-14	Potri.001G302500
Potra003202g20988	125.955	211.706	40.2045	0.189907	-2.39663	7.90208e-27	5.55192e-25	Potri.010G248700
Potra003845g23116	27.7573	46.617	8.8975	0.190864	-2.38939	7.32707e-13	1.64153e-11	Potri.015G005700
Potra003711g22519	15.1168	25.3873	4.84622	0.190891	-2.38918	1.88199e-08	2.41798e-07	Potri.002G174100
Potra001647g13505	285.499	479.182	91.8151	0.191608	-2.38377	1.82587e-47	3.90498e-45	Potri.001G118800
Potra002213g17041	18.09	30.3458	5.8342	0.192257	-2.37889	6.61627e-09	9.20682e-08	Potri.010G188600
Potra195091g31536	4.8231	8.08893	1.55728	0.192519	-2.37692	0.00190745	0.00892811	Potri.012G100100
Potra001002g08342	391.518	656.467	126.568	0.192801	-2.37481	2.89944e-82	1.91936e-79	Potri.018G130100
Potra000864g06982	240.859	403.52	78.1975	0.193788	-2.36745	1.58377e-15	4.67446e-14	Potri.006G237100
Potra007760g26019	5415.8	9070.83	1760.77	0.194114	-2.36503	1.93901e-60	7.48753e-58	Potri.006G126800
Potra198119g33722	5.99321	10.036	1.95047	0.194349	-2.36328	0.00113521	0.00565766	Potri.011G128500
Potra196736g29139	10.7075	17.9244	3.49053	0.194736	-2.36041	2.68947e-05	0.00019785	Potri.019G011400
Potra004009g24159	279.955	468.344	91.5663	0.195511	-2.35468	7.03809e-07	6.95875e-06	Potri.008G086500
Potra001741g31191	51.5893	86.2975	16.8811	0.195615	-2.35391	4.22692e-23	2.32255e-21	Potri.005G239000
Potra000759g05987	3.49406	5.84126	1.14685	0.196336	-2.3486	0.0109085	0.0399858	Potri.004G046100
Potra001325g11390	31.6725	52.9406	10.4044	0.19653	-2.34718	3.93926e-14	1.01504e-12	Potri.019G119200
Potra161556g34094	5.76031	9.62268	1.89794	0.197236	-2.342	0.00534068	0.0218427	Potri.019G020500
Potra197473g30288	182.288	304.402	60.1736	0.197678	-2.33878	3.59228e-47	7.39824e-45	Potri.003G016400
Potra003903g23434	77.7979	129.872	25.7235	0.198067	-2.33594	7.86308e-27	5.54866e-25	Potri.011G123500
Potra194430g28953	33.7185	56.2836	11.1533	0.198163	-2.33524	2.18922e-13	5.14513e-12	Potri.009G110000
Potra003413g21587	80.6665	134.636	26.6968	0.198288	-2.33433	5.35302e-05	0.000370593	Potri.007G096200
Potra001859g14892	50.9069	84.9327	16.8811	0.198758	-2.33091	2.85931e-18	1.0905e-16	Potri.010G027600
Potra003857g32411	7.7415	12.9158	2.56718	0.198762	-2.33088	0.00110291	0.00551603	Potri.016G098300
Potra002394g18207	7.37865	12.3086	2.44874	0.198946	-2.32955	7.6063e-05	0.000509462	Potri.007G095400
Potra169527g27449	9.89375	16.5033	3.28424	0.199006	-2.32912	9.44439e-06	7.60007e-05	Potri.001G452500
Potra000378g01635	11.5389	19.2453	3.83247	0.199139	-2.32815	3.15436e-05	0.000229343	Potri.013G135700
Potra000945g33539	14.3949	23.9973	4.79241	0.199706	-2.32405	2.95471e-06	2.61125e-05	Potri.018G100200
Potra001890g15045	452.949	755.093	150.805	0.199717	-2.32397	7.04719e-88	5.02392e-85	Potri.001G463000
Potra000739g05828	11.6623	19.4395	3.88501	0.199851	-2.323	6.97417e-06	5.76577e-05	Potri.009G110200
Potra001139g09963	4.61409	7.68813	1.54005	0.200315	-2.31966	0.0053445	0.021851	Potri.011G063100
Potra009913g26449	61.4643	102.413	20.5159	0.200326	-2.31958	1.04023e-16	3.42671e-15	Potri.002G167900
Potra001171g10147	21.8311	36.3685	7.29368	0.200549	-2.31797	7.49023e-10	1.17457e-08	Potri.005G171400
Potra000684g05306	14.2849	23.7968	4.77304	0.200575	-2.31779	0.0013212	0.00647967	Potri.010G029300
Potra000436g32630	6.28673	10.468	2.10551	0.201138	-2.31374	0.00140779	0.00684876	Potri.018G132300
Potra003788g22863	13.3265	22.188	4.46512	0.201241	-2.31301	0.00204083	0.00947267	Potri.001G058100
Potra001281g11064	31.7382	52.7654	10.711	0.202993	-2.30049	4.7091e-10	7.56367e-09	Potri.003G130500
Potra001726g14041	31.7986	52.8655	10.7317	0.203	-2.30045	1.23501e-13	2.99887e-12	Potri.008G068000
Potra003452g21709	9.17424	15.2512	3.09733	0.203088	-2.29982	1.96311e-05	0.000148558	Potri.014G039800
Potra007728g26012	170.947	284.161	57.732	0.203166	-2.29927	7.51106e-28	5.67472e-26	Potri.T091700
Potra002407g18315	95.3989	158.54	32.2579	0.203469	-2.29712	1.81066e-31	1.62393e-29	Potri.006G213100
Potra000016g00095	12.7992	21.2676	4.33074	0.203631	-2.29597	0.000868241	0.00447261	Potri.005G192000
Potra002277g17463	106.159	176.383	35.9362	0.20374	-2.2952	1.77055e-09	2.62681e-08	Potri.004G188200
Potra001645g13490	24.4619	40.6383	8.2855	0.203884	-2.29418	5.82131e-12	1.18871e-10	Potri.002G126300
Potra008641g26202	23.6507	39.2859	8.01545	0.204029	-2.29316	3.24504e-10	5.31342e-09	Potri.007G040400
Potra187788g28537	4.34572	7.21858	1.47286	0.204037	-2.2931	0.00751746	0.0291951	Potri.014G003600
Potra002412g18355	948.939	1576.11	321.769	0.204154	-2.29227	3.24206e-92	2.65115e-89	Potri.010G233700
Potra003767g22767	119.56	198.277	40.8423	0.205986	-2.27938	1.54902e-39	2.35342e-37	Potri.008G086800
Potra000443g02453	19.7445	32.7435	6.74545	0.206009	-2.27922	4.31864e-06	3.70247e-05	Potri.005G228800
Potra001031g08653	35.9029	59.5143	12.2915	0.20653	-2.27557	6.5797e-16	2.01693e-14	Potri.007G111900
Potra001123g09905	155.724	257.998	53.4499	0.207172	-2.2711	9.88498e-36	1.1695e-33	Potri.017G109300
Potra001065g09170	89.9311	148.98	30.8823	0.207292	-2.27026	2.87538e-23	1.59569e-21	Potri.016G124900
Potra000669g05183	172.295	285.369	59.2212	0.207525	-2.26864	2.89524e-36	3.5461e-34	Potri.016G056500
Potra002133g16529	292.616	484.623	100.61	0.207604	-2.26809	3.15205e-58	1.16848e-55	Potri.002G141700
Potra001550g12843	23.9821	39.7178	8.24634	0.207623	-2.26796	1.65103e-08	2.14603e-07	Potri.002G178400
Potra001273g10997	55.1516	91.3313	18.972	0.207728	-2.26723	7.10763e-20	3.06378e-18	Potri.018G096100
Potra001707g13908	13.6293	22.5699	4.68863	0.207738	-2.26716	1.1092e-06	1.06086e-05	Potri.005G241200
Potra000855g33429	15.3253	25.3747	5.27601	0.207924	-2.26587	2.5592e-08	3.23278e-07	Potri.002G093700
Potra000656g05053	359.336	594.852	123.82	0.208152	-2.26429	6.38189e-06	5.29817e-05	Potri.012G017400
Potra000520g32907	9.24317	15.3012	3.18517	0.208165	-2.2642	1.63695e-05	0.000125933	Potri.010G121300
Potra001030g08639	7.13621	11.8077	2.46468	0.208734	-2.26026	0.000171185	0.00105789	Potri.002G172900
Potra000458g02642	872.039	1442.23	301.847	0.209292	-2.25641	3.68597e-100	4.09924e-97	Potri.001G332200
Potra195236g29028	4.74737	7.8509	1.64383	0.209382	-2.25579	0.0100949	0.0374824	Potri.001G268000
Potra002038g15937	4.29421	7.09963	1.4888	0.209701	-2.25359	0.0111756	0.0408029	Potri.013G027100
Potra196538g29116	38.052	62.9076	13.1964	0.209774	-2.25309	3.23449e-14	8.41241e-13	#N/A
Potra003699g22480	4.97363	8.22029	1.72697	0.210086	-2.25095	0.00795506	0.0306082	Potri.015G061600
Potra182237g28213	291.218	481.23	101.205	0.210305	-2.24944	1.40638e-63	6.01562e-61	Potri.006G259400
Potra002186g16837	13.2502	21.8937	4.60678	0.210415	-2.24869	2.80171e-07	2.99946e-06	Potri.002G096100
Potra000556g04027	28.1462	46.5046	9.78768	0.210467	-2.24834	2.16426e-12	4.59686e-11	Potri.006G112800
Potra000242g00958	25.2012	41.6213	8.7812	0.210979	-2.24483	5.13962e-11	9.4011e-10	Potri.013G054200
Potra183351g28297	12.4241	20.5162	4.33202	0.211151	-2.24365	5.72254e-07	5.78138e-06	Potri.017G053200
Potra000396g32466	4.31472	7.12469	1.50474	0.211201	-2.24331	0.00839529	0.0320096	Potri.001G404500
Potra002003g15720	5.88483	9.71669	2.05297	0.211283	-2.24275	0.00749732	0.0291291	Potri.009G160700
Potra004517g25021	7.35022	12.1333	2.56718	0.211582	-2.24071	0.00266347	0.0119884	Potri.009G020700
Potra009420g26351	156.649	258.466	54.8311	0.21214	-2.23691	8.6352e-09	1.17689e-07	Potri.005G223500
Potra000366g01501	4.54334	7.49409	1.59258	0.212512	-2.23438	0.00566882	0.0229719	Potri.001G293400
Potra000488g03047	13.36	22.0313	4.68863	0.212816	-2.23232	1.89386e-05	0.00014367	Potri.007G077600
Potra008392g26155	7.50025	12.3649	2.63565	0.213157	-2.23001	0.000827561	0.00428558	Potri.010G154900
Potra002128g31653	9.25864	15.2636	3.25364	0.213163	-2.22997	2.11237e-05	0.000158516	Potri.002G068000
Potra197017g29172	10.5724	17.4173	3.72741	0.214006	-2.22428	0.000170273	0.00105296	Potri.001G418100
Potra000556g04025	8.58898	14.1491	3.02885	0.214067	-2.22387	0.000162175	0.00100736	Potri.006G113100
Potra193688g34304	19.5854	32.2616	6.90915	0.21416	-2.22324	7.42131e-08	8.70977e-07	Potri.014G009200
Potra003991g24036	202.602	333.54	71.664	0.214859	-2.21854	2.12614e-30	1.79675e-28	Potri.008G144900
Potra004568g25075	42.023	69.1494	14.8966	0.215426	-2.21474	1.49247e-06	1.3962e-05	Potri.001G168600
Potra001117g35796	207.127	340.776	73.4771	0.215617	-2.21346	2.01175e-25	1.30076e-23	Potri.006G235800
Potra000526g03618	134.852	221.773	47.9309	0.216126	-2.21005	5.12775e-40	7.92037e-38	Potri.004G001800
Potra001927g15280	3.66236	6.02283	1.30188	0.216158	-2.20984	0.0117064	0.0424898	Potri.007G109500
Potra001449g12196	37.9634	62.4129	13.5138	0.216522	-2.20741	1.15778e-06	1.10352e-05	Potri.013G111900
Potra002542g19149	10.1262	16.641	3.61153	0.217027	-2.20406	1.02082e-05	8.16979e-05	Potri.016G015700
Potra000374g01591	107.332	176.383	38.2812	0.217035	-2.204	2.55351e-20	1.14509e-18	Potri.019G055800
Potra186239g28422	24.841	40.8199	8.86219	0.217105	-2.20354	9.87089e-08	1.13078e-06	Potri.001G410400
Potra002589g19467	128.809	211.637	45.9814	0.217266	-2.20247	8.97723e-20	3.82813e-18	Potri.014G140000
Potra194989g29003	4.83341	7.93857	1.72825	0.217703	-2.19957	0.00425592	0.0179886	Potri.009G149900
Potra003815g22964	79.6609	130.817	28.5043	0.217894	-2.1983	1.89691e-14	5.03722e-13	Potri.013G043700
Potra001311g11262	18.54	30.4395	6.64038	0.21815	-2.19661	0.000173868	0.00107281	Potri.008G049200
Potra000943g34720	29.2082	47.9448	10.4716	0.218409	-2.19489	2.79821e-12	5.87604e-11	Potri.002G216000
Potra001265g10935	19.4553	31.9295	6.98105	0.21864	-2.19337	3.38841e-06	2.96438e-05	Potri.003G122700
Potra001585g13101	7.9501	13.041	2.85916	0.219243	-2.1894	0.00011211	0.000721358	Potri.001G270800
Potra000443g02459	27.8164	45.6092	10.0237	0.219774	-2.18591	4.22193e-11	7.82028e-10	Potri.005G228100
Potra000508g03334	14.757	24.1915	5.32256	0.220018	-2.18431	1.38882e-06	1.30672e-05	Potri.008G026600
Potra001967g15523	5.54926	9.09679	2.00172	0.220047	-2.18411	0.00715682	0.0279664	Potri.006G259200
Potra003682g22423	32.2412	52.8467	11.6357	0.220177	-2.18326	3.72326e-10	6.07143e-09	Potri.009G118100
Potra003493g21821	528.903	866.35	191.456	0.220991	-2.17794	3.00427e-10	4.95127e-09	Potri.015G143600
Potra004058g24401	70.3705	115.265	25.4755	0.221016	-2.17778	1.48568e-15	4.41307e-14	Potri.001G410600
Potra001458g12260	45.5344	74.5649	16.5038	0.221335	-2.1757	1.96004e-17	6.80338e-16	Potri.002G205400
Potra004020g32522	16.1461	26.4201	5.87207	0.222258	-2.16969	3.56322e-07	3.75681e-06	Potri.011G145200
Potra002434g18471	4.74887	7.76948	1.72825	0.222441	-2.16851	0.0102833	0.0380346	Potri.018G127700
Potra000539g03793	6.2407	10.2049	2.27648	0.223077	-2.16439	0.0106929	0.0393401	Potri.014G145800
Potra003641g22253	103.346	168.983	37.7088	0.223151	-2.16391	1.99115e-35	2.32605e-33	Potri.003G009400
Potra002064g16097	17.9381	29.319	6.55725	0.223652	-2.16068	1.25531e-08	1.66833e-07	Potri.017G055900
Potra003392g21535	23.472	38.3532	8.59086	0.223994	-2.15847	8.32232e-10	1.29846e-08	Potri.018G121100
Potra001734g14129	187.623	306.5	68.7448	0.224289	-2.15657	1.03704e-50	2.69466e-48	Potri.013G050900
Potra001265g10922	587.392	959.396	215.388	0.224504	-2.15519	6.85368e-15	1.90362e-13	Potri.003G124400
Potra001734g14121	305.527	498.998	112.057	0.224563	-2.15481	1.25495e-22	6.65912e-21	Potri.014G076800
Potra000961g07901	1171.8	1913.52	430.08	0.224759	-2.15355	1.08582e-72	5.59055e-70	Potri.011G120300
Potra183680g35307	78.8646	128.764	28.9651	0.224947	-2.15234	8.1071e-21	3.78826e-19	Potri.010G198100
Potra001978g15586	417.164	681.008	153.32	0.225136	-2.15113	3.42307e-48	7.86542e-46	Potri.017G074400
Potra001975g15567	47.2371	77.1068	17.3674	0.225238	-2.15048	6.21954e-17	2.08089e-15	Potri.008G028900
Potra000019g00100	78.9036	128.714	29.093	0.226028	-2.14543	7.41919e-21	3.50214e-19	Potri.018G141800
Potra001697g13866	564.472	920.494	208.451	0.226456	-2.1427	1.78216e-28	1.38794e-26	Potri.001G231400
Potra001042g08799	381.516	621.601	141.431	0.227526	-2.13589	1.56442e-34	1.69243e-32	Potri.008G178100
Potra002279g17473	16.0862	26.2012	5.97115	0.227896	-2.13355	2.68745e-06	2.39715e-05	Potri.004G212200
Potra178896g27978	38.138	62.0938	14.1822	0.2284	-2.13037	2.65097e-10	4.40029e-09	Potri.005G167700
Potra000931g07605	6.01578	9.79166	2.23989	0.228755	-2.12813	0.00760902	0.0294931	Potri.001G089500
Potra152638g26711	191.682	311.833	71.531	0.229389	-2.12413	1.49e-44	2.89695e-42	Potri.010G015100
Potra002051g16006	104.969	170.717	39.2213	0.229745	-2.1219	7.50252e-20	3.21902e-18	Potri.003G026600
Potra001382g34375	12.9281	21.0172	4.83895	0.230238	-2.1188	1.96891e-05	0.000148916	Potri.004G054300
Potra001875g14977	29.4266	47.838	11.0151	0.230258	-2.11868	6.57069e-10	1.0368e-08	Potri.006G202200
Potra000531g03700	221.626	360.222	83.0292	0.230494	-2.1172	7.33899e-34	7.6709e-32	Potri.008G198100
Potra000845g06813	13.8257	22.4633	5.18817	0.230962	-2.11427	0.000137191	0.000862971	Potri.004G067100
Potra000601g04566	5.33706	8.67111	2.00301	0.230998	-2.11405	0.00148314	0.00716271	Potri.003G037700
Potra000678g05264	27.7377	45.0586	10.4169	0.231186	-2.11287	8.95792e-09	1.21848e-07	Potri.011G145700
Potra004020g24287	4.23342	6.87425	1.59258	0.231674	-2.10983	0.0106885	0.0393292	Potri.011G145000
Potra001042g08794	1648.58	2676.33	620.826	0.231969	-2.108	2.81179e-96	2.60587e-93	Potri.008G177500
Potra002247g17264	7.6829	12.4713	2.89447	0.23209	-2.10725	0.000922738	0.00471857	Potri.008G155200
Potra006941g25874	7.88975	12.8032	2.97632	0.232467	-2.1049	0.000586649	0.00316201	Potri.003G016200
Potra000762g06024	41.2178	66.8831	15.5525	0.232533	-2.10449	8.47878e-11	1.50643e-09	Potri.006G199500
Potra003820g22981	37.2298	60.3971	14.0625	0.232833	-2.10263	1.25308e-12	2.7411e-11	Potri.016G023200
Potra002138g16553	7.10017	11.5134	2.6869	0.233371	-2.0993	0.00159663	0.00762998	Potri.004G032500
Potra002559g19284	34.4606	55.858	13.0632	0.233865	-2.09625	5.55989e-14	1.40657e-12	Potri.007G134300
Potra003912g23476	287.443	465.89	108.995	0.23395	-2.09573	3.70024e-21	1.78607e-19	Potri.004G068500
Potra001167g10122	413.596	670.335	156.857	0.233999	-2.09543	1.35356e-69	6.60229e-67	Potri.010G038200
Potra000858g06960	101.972	165.264	38.6791	0.234044	-2.09515	1.78351e-15	5.24728e-14	Potri.003G150700
Potra172484g27595	119.702	193.994	45.4103	0.234081	-2.09492	1.1977e-27	8.95155e-26	Potri.015G073600
Potra001100g30554	4.96417	8.04506	1.88328	0.234092	-2.09485	0.00622308	0.0248925	Potri.017G054200
Potra002347g17924	1114.22	1805.37	423.065	0.234338	-2.09334	1.91352e-92	1.61217e-89	Potri.016G113300
Potra000935g07632	89.4055	144.823	33.9883	0.234689	-2.09118	1.3167e-16	4.28166e-15	Potri.003G070600
Potra000743g05857	3.73475	6.04789	1.42161	0.235058	-2.08891	0.013126	0.0467655	Potri.001G405700
Potra002699g19788	42.0245	68.0288	16.0202	0.235491	-2.08625	2.06661e-16	6.61957e-15	Potri.007G018400
Potra001765g31236	98.9925	160.224	37.7613	0.235678	-2.08511	7.46396e-24	4.34143e-22	Potri.010G118000
Potra002386g18173	156.944	253.941	59.9474	0.236069	-2.08272	4.44652e-11	8.20349e-10	Potri.014G074500
Potra193971g34554	6.1335	9.92332	2.34367	0.236178	-2.08205	0.00682782	0.0269039	#N/A
Potra162483g27017	50.1579	81.1449	19.1709	0.236255	-2.08158	3.36812e-05	0.000243484	Potri.004G019900
Potra164328g27166	22.9973	37.1948	8.7997	0.236584	-2.07958	2.26859e-09	3.3337e-08	Potri.T143600
Potra002081g16213	331.196	535.578	126.814	0.236781	-2.07838	2.18043e-32	2.04116e-30	Potri.008G141000
Potra000625g04754	50.2341	81.2262	19.242	0.236894	-2.07769	5.63185e-10	8.94245e-09	Potri.002G019300
Potra001316g11298	61.4335	99.2697	23.5973	0.237709	-2.07273	6.915e-10	1.08805e-08	Potri.011G045000
Potra002667g19707	15.1307	24.4418	5.81954	0.238098	-2.07037	0.00428352	0.018083	Potri.018G098000
Potra007956g26066	8.28636	13.3729	3.19983	0.239277	-2.06325	0.000919829	0.0047063	Potri.015G038800
Potra000924g07478	8.42218	13.592	3.25236	0.239285	-2.0632	0.000874435	0.0045022	Potri.T108100
Potra001022g08539	680.389	1097.58	263.199	0.2398	-2.0601	6.24925e-64	2.71481e-61	Potri.008G156600
Potra000995g08248	196.135	316.385	75.8856	0.239852	-2.05978	6.28935e-27	4.47219e-25	Potri.008G103900
Potra000803g06379	27.6766	44.6263	10.727	0.240373	-2.05665	1.63521e-09	2.43382e-08	Potri.009G044200
Potra000276g01030	17.29	27.8664	6.71356	0.24092	-2.05338	4.21326e-08	5.1718e-07	Potri.017G081600
Potra002900g20266	35.1957	56.6783	13.7131	0.241947	-2.04724	5.45791e-14	1.38202e-12	Potri.006G155000
Potra000509g03351	28.0109	45.102	10.9199	0.242115	-2.04623	1.57606e-06	1.46825e-05	Potri.012G082400
Potra189617g28702	65.5416	105.511	25.5719	0.242361	-2.04477	6.72514e-08	7.9262e-07	Potri.012G081800
Potra165170g34688	220.625	355.145	86.1038	0.242447	-2.04426	1.52723e-37	1.98419e-35	Potri.001G323700
Potra195190g31539	104.466	168.138	40.7931	0.242617	-2.04325	4.80049e-11	8.82141e-10	Potri.002G190800
Potra001747g14242	18.0151	28.9806	7.04952	0.24325	-2.03949	0.0109877	0.0402279	Potri.009G149200
Potra001633g13423	216.302	347.908	84.6954	0.243442	-2.03835	3.02309e-15	8.72802e-14	Potri.010G096100
Potra000682g05279	23.0716	37.1007	9.04258	0.243731	-2.03664	3.09997e-06	2.72695e-05	Potri.006G179400
Potra171125g27572	134.578	216.351	52.8056	0.244074	-2.03461	8.29678e-37	1.05331e-34	Potri.011G129900
Potra000546g03880	4.49107	7.21858	1.76356	0.244308	-2.03323	0.0124409	0.0447875	Potri.011G167500
Potra002041g15958	5.82981	9.36592	2.2937	0.244899	-2.02974	0.00228668	0.0104704	Potri.002G068400
Potra000508g03313	28.7099	46.1227	11.2971	0.244937	-2.02952	1.15645e-06	1.10263e-05	Potri.008G023900
Potra000672g33169	6.82785	10.9688	2.6869	0.244959	-2.02939	0.00126371	0.0062219	Potri.017G132300
Potra187831g28542	22.5561	36.2307	8.88156	0.245139	-2.02833	6.34538e-08	7.52006e-07	Potri.016G124900
Potra001301g11191	69.2416	111.19	27.2928	0.245461	-2.02644	1.51556e-15	4.48746e-14	Potri.001G087900
Potra003830g23026	27.5812	44.2758	10.8867	0.245884	-2.02395	2.40742e-09	3.51911e-08	Potri.009G133600
Potra179435g28016	50.8499	81.6085	20.0913	0.246191	-2.02215	9.11635e-17	3.01381e-15	Potri.002G216000
Potra000770g06076	10.7299	17.217	4.2429	0.246437	-2.02071	7.28967e-05	0.000490263	Potri.006G173700
Potra000823g06564	35.0323	56.2024	13.8622	0.246647	-2.01948	8.40352e-13	1.87364e-11	Potri.001G172300
Potra004238g24715	684.44	1097.57	271.307	0.247188	-2.01632	4.17149e-77	2.5213e-74	Potri.011G159000
Potra195134g29017	6.30932	10.1174	2.50127	0.247225	-2.0161	0.000533951	0.00290973	Potri.002G021400
Potra000537g03767	11.9171	19.1077	4.7265	0.247361	-2.01531	1.46053e-05	0.000113428	Potri.006G221200
Potra180643g28115	68.7281	110.169	27.2867	0.24768	-2.01345	1.171e-13	2.85341e-12	Potri.017G098100
Potra002158g16675	327.584	525.097	130.071	0.247709	-2.01328	1.11665e-16	3.65678e-15	Potri.016G065000
Potra168112g27338	77.3882	124.006	30.77	0.248132	-2.01082	4.63701e-20	2.02709e-18	Potri.002G050400
Potra000832g06672	21.8241	34.9535	8.69464	0.248749	-2.00724	1.37678e-08	1.81588e-07	Potri.007G056300
Potra002152g16648	42.6832	68.3543	17.012	0.24888	-2.00648	1.17155e-14	3.17473e-13	Potri.010G080900
Potra001270g10970	281.613	450.965	112.26	0.248933	-2.00617	7.14706e-39	1.03495e-36	Potri.003G113300
Potra190055g28742	292.426	468.176	116.675	0.249213	-2.00455	2.83205e-32	2.62465e-30	Potri.001G133200
Potra002585g19433	4.88191	7.81335	1.95047	0.249633	-2.00212	0.0137247	0.0484561	Potri.016G034900
Potra001056g09038	110.796	177.303	44.2893	0.249795	-2.00119	1.78043e-25	1.15388e-23	Potri.004G105500
Potra004137g24602	16.2628	26.0196	6.506	0.250042	-1.99976	2.93524e-07	3.13036e-06	Potri.008G161200
Potra000443g02456	150.252	240.299	60.2052	0.250543	-1.99687	5.73844e-26	3.83523e-24	Potri.005G228500
Potra010306g26557	106.335	170.022	42.6473	0.250834	-1.99519	6.84478e-18	2.48117e-16	Potri.001G422600
Potra165169g27207	285.241	456.042	114.439	0.25094	-1.99459	1.01742e-24	6.27211e-23	Potri.001G323700
Potra006322g34019	77.311	123.543	31.0792	0.251566	-1.99099	5.37929e-18	1.98093e-16	Potri.002G258200
Potra002624g19599	42.5938	68.0477	17.14	0.251882	-1.98918	1.16399e-11	2.29521e-10	Potri.001G105800
Potra001781g14491	52	83.0297	20.9702	0.252563	-1.98529	1.09239e-13	2.67356e-12	Potri.010G195700
Potra000858g06950	40.1271	64.0596	16.1946	0.252805	-1.9839	3.11776e-06	2.74031e-05	Potri.003G152300
Potra001105g09671	4.2338	6.75529	1.71231	0.253476	-1.98008	0.00913987	0.0343602	Potri.002G158000
Potra000156g00559	7.18998	11.4696	2.91041	0.253751	-1.97852	0.00277361	0.0124178	Potri.005G074400
Potra196687g29136	89.7362	143.107	36.3652	0.254111	-1.97647	1.16156e-17	4.11923e-16	Potri.T045500
Potra001624g13367	5.95545	9.49746	2.41343	0.254113	-1.97646	0.00288114	0.0128208	Potri.006G207400
Potra000601g04563	24.3435	38.8102	9.8768	0.25449	-1.97432	1.07989e-09	1.65606e-08	Potri.003G038200
Potra148256g30852	7.59166	12.1019	3.08138	0.254619	-1.97359	0.00198561	0.00924566	Potri.012G089800
Potra001444g12162	5.81278	9.26594	2.35961	0.254655	-1.97339	0.00652035	0.0258831	Potri.003G207500
Potra000007g33219	9.65523	15.3889	3.9216	0.254833	-1.97237	0.000114302	0.000734107	Potri.004G090000
Potra000373g01587	13.2778	21.1487	5.40697	0.255665	-1.96768	2.56612e-05	0.000189397	Potri.003G072200
Potra000839g06763	18.478	29.4253	7.53056	0.255921	-1.96623	2.1324e-06	1.93749e-05	Potri.T177100
Potra002057g16051	120.708	192.216	49.2006	0.255965	-1.96598	8.29692e-28	6.23457e-26	Potri.002G099900
Potra001395g11861	14.6462	23.3212	5.97115	0.25604	-1.96556	2.00139e-06	1.82921e-05	Potri.005G185200
Potra002741g19882	20.3915	32.4682	8.31482	0.256092	-1.96527	1.25955e-07	1.41664e-06	Potri.002G086900
Potra001943g15375	143.768	228.911	58.626	0.256109	-1.96517	6.44934e-31	5.60347e-29	Potri.018G039600
Potra002285g17508	4038.45	6428.89	1648	0.256343	-1.96385	1.4029e-55	4.48332e-53	Potri.006G228600
Potra002453g18580	133.579	212.645	54.5124	0.256354	-1.96379	2.23081e-17	7.69518e-16	Potri.009G138900
Potra002108g16381	45.7902	72.8871	18.6933	0.256469	-1.96314	1.36149e-13	3.28875e-12	Potri.007G057200
Potra000991g08210	59.1176	94.0604	24.1747	0.257013	-1.96009	0.000100993	0.000656362	Potri.006G085200
Potra173688g27662	893.83	1421.95	365.711	0.25719	-1.95909	3.47196e-25	2.19388e-23	Potri.002G106800
Potra000792g06273	5.56141	8.84635	2.27648	0.257336	-1.95828	0.0114416	0.0416435	Potri.006G210600
Potra000728g05715	84.7877	134.869	34.7067	0.257337	-1.95827	8.63062e-24	4.95779e-22	Potri.001G072500
Potra000344g01208	19.3334	30.7464	7.92034	0.257602	-1.95678	2.03529e-06	1.85775e-05	Potri.003G128100
Potra002580g31940	36.1595	57.4982	14.8208	0.257761	-1.95589	1.65417e-12	3.56794e-11	Potri.013G156100
Potra002409g18326	156.652	249.058	64.2458	0.257955	-1.95481	8.71302e-37	1.09615e-34	Potri.009G060600
Potra003957g23755	992.968	1577.97	407.97	0.258542	-1.95153	7.25942e-07	7.15976e-06	Potri.001G141700
Potra000840g06781	11.4428	18.181	4.70457	0.258762	-1.9503	0.000190102	0.00116112	Potri.006G114700
Potra000712g05571	6.10313	9.69162	2.51465	0.259466	-1.94638	0.0133255	0.0473588	Potri.011G115100
Potra001684g13792	8.91085	14.143	3.67872	0.26011	-1.94281	0.000376856	0.00213439	Potri.007G006600
Potra000613g04664	102.392	162.485	42.2989	0.260325	-1.94162	2.64722e-29	2.13335e-27	Potri.003G131700
Potra001105g09664	74.722	118.553	30.891	0.260567	-1.94027	1.57286e-19	6.52689e-18	Potri.002G159200
Potra002030g15892	46.9827	74.5025	19.4629	0.261238	-1.93656	6.93454e-15	1.92416e-13	Potri.001G327000
Potra001421g12030	201.753	319.797	83.7087	0.261756	-1.93371	1.58021e-17	5.57545e-16	Potri.009G114300
Potra000626g04773	103.073	163.354	42.7928	0.261964	-1.93256	4.29508e-10	6.93876e-09	Potri.016G069700
Potra003378g21496	13.2658	21.0235	5.50819	0.262002	-1.93235	8.39809e-05	0.000556909	Potri.012G035200
Potra000489g03068	85.5801	135.613	35.5468	0.262118	-1.93171	6.74622e-25	4.21494e-23	Potri.009G022300
Potra000508g03332	6895.57	10924.8	2866.32	0.262368	-1.93034	4.0566e-50	1.00702e-47	Potri.008G026400
Potra000876g07070	290.363	459.969	120.756	0.26253	-1.92945	5.75596e-48	1.28026e-45	Potri.001G000800
Potra001424g12047	73.3776	116.223	30.5318	0.262699	-1.92852	7.76854e-08	9.07134e-07	Potri.004G112700
Potra000689g05349	19.7557	31.2784	8.23297	0.263216	-1.92568	4.23563e-07	4.39088e-06	Potri.012G120400
Potra001542g12787	398.302	630.597	166.006	0.263253	-1.92548	2.09233e-44	3.98446e-42	Potri.007G014200
Potra001076g09297	25.0283	39.6177	10.4388	0.263489	-1.92418	1.88297e-06	1.72779e-05	Potri.005G181600
Potra003647g22278	22.043	34.8784	9.20756	0.26399	-1.92144	1.93096e-07	2.11364e-06	Potri.014G077900
Potra000526g03611	42.3059	66.9332	17.6787	0.264125	-1.92071	1.78737e-13	4.26195e-12	Potri.004G002700
Potra002338g17867	2881.96	4559.3	1204.63	0.264214	-1.92022	5.59163e-36	6.73005e-34	Potri.001G018200
Potra008583g26189	160.122	253.271	66.9731	0.264433	-1.91903	3.82287e-32	3.50783e-30	Potri.005G246800
Potra001611g13276	50.2599	79.4863	21.0336	0.264619	-1.91801	3.07899e-14	8.03051e-13	Potri.001G035500
Potra169457g27442	21.611	34.1647	9.05724	0.265105	-1.91536	0.000102142	0.000663237	Potri.006G082700
Potra000282g01042	71.96	113.757	30.1631	0.265154	-1.9151	1.12596e-17	3.99811e-16	Potri.T059200
Potra001665g13688	10.3143	16.2966	4.33202	0.265824	-1.91146	0.00272339	0.012226	Potri.001G051300
Potra001724g14032	8.02816	12.6842	3.37208	0.265848	-1.91132	0.00128236	0.00630924	Potri.012G079500
Potra002393g18199	10.3311	16.3154	4.34668	0.266415	-1.90825	0.000547117	0.00297216	Potri.017G033600
Potra002456g18616	5.48344	8.65852	2.30837	0.266601	-1.90725	0.00791035	0.030491	#N/A
Potra000346g01237	7.88297	12.4464	3.31955	0.266708	-1.90667	0.00143101	0.00694351	Potri.001G164800
Potra000709g05549	126.971	200.43	53.5114	0.266983	-1.90518	8.92369e-30	7.31874e-28	Potri.004G186900
Potra000789g35348	17.9273	28.2922	7.56245	0.267298	-1.90348	1.97105e-06	1.80207e-05	Potri.018G024200
Potra000876g07060	200.355	316.128	84.5809	0.267553	-1.90211	3.01165e-12	6.3147e-11	Potri.001G002300
Potra187320g28496	71.8337	113.319	30.3487	0.267818	-1.90068	1.48387e-20	6.76327e-19	Potri.008G205200
Potra163525g27101	586.239	924.646	247.833	0.26803	-1.89953	1.13959e-22	6.06971e-21	Potri.004G229000
Potra000548g03927	64.1495	101.179	27.1197	0.268036	-1.8995	0.000107036	0.000691432	Potri.004G134800
Potra000215g00894	253.214	399.37	107.057	0.268065	-1.89935	1.7539e-37	2.25758e-35	Potri.001G191300
Potra002545g19167	179.732	283.423	76.0416	0.268297	-1.8981	3.08542e-32	2.84997e-30	Potri.008G144900
Potra004122g24540	65.5298	103.307	27.7522	0.268638	-1.89627	3.39618e-07	3.5889e-06	Potri.016G132500
Potra196911g29170	265.037	417.571	112.504	0.269424	-1.89205	4.42566e-31	3.86939e-29	Potri.011G037100
Potra004866g25198	693.769	1092.98	294.561	0.269504	-1.89162	2.54035e-50	6.42085e-48	Potri.001G279500
Potra009859g26442	32.4389	51.1	13.7777	0.269623	-1.89098	2.71585e-10	4.50529e-09	Potri.011G033800
Potra175785g27830	100.772	158.722	42.8216	0.269791	-1.89009	6.36606e-24	3.74198e-22	Potri.017G013700
Potra003747g22673	31.4137	49.4283	13.3992	0.271084	-1.88319	1.12534e-10	1.96903e-09	Potri.008G176300
Potra003531g21921	87.4308	137.554	37.3074	0.27122	-1.88246	4.74627e-21	2.27911e-19	Potri.005G186400
Potra002388g18181	7.60514	11.9579	3.25236	0.271984	-1.87841	0.00288263	0.0128254	#N/A
Potra000226g00916	486.712	765.191	208.233	0.272132	-1.87762	1.87477e-57	6.51553e-55	Potri.013G116400
Potra000583g04350	12.3383	19.3894	5.28725	0.272688	-1.87468	5.55144e-05	0.000383184	Potri.012G059600
Potra003836g23057	39.6769	62.3443	17.0095	0.272831	-1.87392	1.29439e-11	2.54151e-10	Potri.004G176800
Potra000413g02048	23.6315	37.1261	10.1369	0.27304	-1.87282	6.74496e-09	9.37183e-08	Potri.002G149000
Potra000410g02010	35.8376	56.2962	15.379	0.27318	-1.87208	8.50374e-08	9.85123e-07	Potri.001G182000
Potra001499g30861	6.17468	9.69777	2.6516	0.273423	-1.87079	0.014166	0.0497106	Potri.004G198500
Potra009201g26306	11.7713	18.4755	5.06717	0.274264	-1.86636	0.000403658	0.00227138	Potri.002G065200
Potra000575g04281	27.1653	42.623	11.7075	0.274677	-1.86419	1.39107e-08	1.83211e-07	#N/A
Potra004487g24975	431.422	676.877	185.968	0.274744	-1.86384	6.46863e-26	4.2923e-24	Potri.001G410300
Potra001931g15302	30.4368	47.7504	13.1232	0.274828	-1.8634	8.35126e-09	1.14154e-07	Potri.014G135900
Potra000979g08092	61.7801	96.9159	26.6442	0.274921	-1.86291	3.57477e-15	1.02252e-13	Potri.006G059600
Potra002231g17147	70.9375	111.241	30.6343	0.275388	-1.86046	5.73369e-18	2.10308e-16	Potri.007G042400
Potra000748g05890	22.9475	35.9803	9.91467	0.275558	-1.85957	1.8505e-08	2.38413e-07	Potri.014G032600
Potra000081g00285	167.577	262.693	72.4597	0.275834	-1.85813	8.45695e-22	4.25187e-20	Potri.004G215400
Potra003367g21465	734.386	1150.97	317.8	0.276114	-1.85666	2.86904e-66	1.32946e-63	Potri.011G167000
Potra002932g20337	9.99813	15.6643	4.33202	0.276554	-1.85436	0.000226813	0.0013561	Potri.016G082700
Potra001467g12309	47.522	74.4209	20.6231	0.277115	-1.85144	9.35132e-13	2.07664e-11	Potri.017G114800
Potra001692g13835	1897.76	2971.58	823.937	0.277272	-1.85063	1.3867e-47	2.98871e-45	Potri.001G401300
Potra000409g01999	28.5421	44.689	12.3953	0.277368	-1.85013	4.97277e-10	7.95959e-09	Potri.001G149100
Potra004476g24962	130.017	203.567	56.4676	0.277391	-1.85001	3.84299e-25	2.42283e-23	Potri.007G039500
Potra005494g25415	34.4834	53.9859	14.981	0.277498	-1.84945	1.39025e-06	1.30762e-05	Potri.004G068100
Potra001520g12654	171.943	269.186	74.7	0.277504	-1.84942	1.14254e-34	1.25558e-32	Potri.005G123200
Potra000604g04584	8.72961	13.6608	3.79845	0.278055	-1.84656	0.00157382	0.00753651	Potri.019G120200
Potra002284g17495	100.761	157.657	43.8651	0.278231	-1.84564	8.4325e-15	2.31212e-13	Potri.015G039700
Potra002115g16429	32.0607	50.1422	13.9793	0.278794	-1.84273	4.22952e-10	6.84478e-09	Potri.009G119900
Potra160899g26891	161.243	252.175	70.3116	0.278821	-1.84259	4.88098e-13	1.11692e-11	Potri.005G084600
Potra001349g11583	44.0304	68.8429	19.2179	0.279156	-1.84086	1.23107e-14	3.32952e-13	Potri.001G154500
Potra002028g15876	66.4389	103.853	29.0249	0.279481	-1.83918	2.90184e-19	1.18299e-17	Potri.002G178300
Potra001700g13886	952.621	1488.68	416.563	0.27982	-1.83743	1.74237e-07	1.92006e-06	Potri.004G167700
Potra001270g10968	84.7677	132.464	37.071	0.279856	-1.83724	2.16991e-22	1.14045e-20	#N/A
Potra182478g28227	155.846	243.517	68.1759	0.279964	-1.83668	3.56367e-17	1.21572e-15	Potri.016G110900
Potra000898g07288	6.90171	10.7746	3.02885	0.281111	-1.83079	0.00699893	0.0274149	Potri.016G143400
Potra002406g18303	251.511	392.497	110.525	0.281594	-1.82831	7.81046e-42	1.30033e-39	Potri.010G130000
Potra001727g14050	50.1195	78.1964	22.0426	0.281888	-1.82681	6.53799e-15	1.8214e-13	Potri.001G112600
Potra001242g10677	5.60236	8.74004	2.46468	0.281998	-1.82624	0.00681159	0.0268552	Potri.014G104700
Potra001534g12742	283.115	441.58	124.649	0.28228	-1.8248	7.36417e-43	1.29586e-40	Potri.003G183200
Potra000806g06399	25.5525	39.8432	11.2618	0.282653	-1.82289	0.000772944	0.00403041	Potri.001G437400
Potra003839g23070	42.3287	65.9942	18.6632	0.282801	-1.82214	1.64582e-10	2.82986e-09	Potri.006G255100
Potra001330g11437	31.7729	49.5286	14.0172	0.283012	-1.82106	7.86626e-10	1.23076e-08	Potri.013G012300
Potra000997g33605	76.4016	119.072	33.7308	0.283279	-1.8197	9.31081e-09	1.26321e-07	Potri.010G208800
Potra189406g28681	32.7199	50.9936	14.4461	0.283293	-1.81963	4.38492e-12	9.07773e-11	Potri.006G057900
Potra148842g26636	12.7079	19.8025	5.61326	0.283462	-1.81877	9.41256e-05	0.000616629	Potri.004G181100
Potra161138g26905	100.031	155.841	44.2217	0.283762	-1.81725	2.46632e-07	2.65883e-06	Potri.002G065300
Potra001056g09040	228.885	356.516	101.255	0.284014	-1.81597	1.18254e-26	8.15836e-25	Potri.004G105700
Potra001215g10494	10.3301	16.09	4.57019	0.284039	-1.81584	0.000756308	0.0039533	Potri.003G148000
Potra002161g16697	37.0937	57.7741	16.4134	0.284096	-1.81555	8.68851e-11	1.5406e-09	Potri.006G091800
Potra003440g21667	80.2564	124.976	35.5366	0.284347	-1.81428	0.00176193	0.00832815	Potri.001G237300
Potra000678g05257	4.87301	7.58798	2.15804	0.284402	-1.814	0.0130137	0.0464585	Potri.001G455500
Potra002014g15800	10.4664	16.2966	4.6361	0.284482	-1.81359	0.001135	0.00565766	Potri.002G194500
Potra001115g09805	8.68951	13.5293	3.8497	0.284545	-1.81327	0.00271067	0.0121772	Potri.004G014000
Potra003680g22411	52.0966	81.095	23.0982	0.284829	-1.81183	4.21909e-06	3.62719e-05	Potri.001G027100
Potra001095g09538	12.6321	19.6523	5.61197	0.285563	-1.80812	0.000223309	0.00133894	Potri.010G109100
Potra001342g11490	8.0568	12.5339	3.57965	0.285596	-1.80795	0.00114297	0.00569192	Potri.010G249500
Potra002388g18182	37.3312	58.062	16.6003	0.285907	-1.80638	1.40172e-08	1.84527e-07	Potri.008G116000
Potra173898g27681	9.15436	14.2368	4.07192	0.286014	-1.80584	0.00175393	0.00829753	Potri.001G352200
Potra002507g18931	44.9388	69.8758	20.0017	0.286247	-1.80467	1.95811e-10	3.31959e-09	Potri.001G111000
Potra003983g23979	12.3006	19.1077	5.49353	0.287504	-1.79835	0.000124926	0.000793899	Potri.014G162600
Potra182098g28206	167.491	260.177	74.8052	0.287516	-1.79828	1.71761e-33	1.73024e-31	Potri.012G067500
Potra004011g24194	45.6187	70.84	20.3975	0.287937	-1.79617	2.66969e-12	5.61463e-11	Potri.008G076300
Potra001791g14536	14.34	22.2631	6.41688	0.288229	-1.79471	2.9626e-05	0.000216533	Potri.004G231100
Potra002846g20121	28.6114	44.4197	12.8032	0.288232	-1.7947	1.69785e-08	2.20277e-07	Potri.006G052700
Potra003875g23282	29.0016	45.0203	12.9828	0.288377	-1.79397	0.00827779	0.0316746	Potri.012G089100
Potra000784g06202	17.6057	27.3217	7.88974	0.288772	-1.792	9.81981e-06	7.87482e-05	Potri.002G139800
Potra001274g11007	76.0844	118.027	34.1421	0.289274	-1.78949	6.53312e-09	9.10022e-08	Potri.006G033500
Potra001789g14524	13.2341	20.5289	5.93926	0.289313	-1.7893	0.000106669	0.000689221	Potri.018G109200
Potra004310g24800	18.0247	27.9542	8.09516	0.289587	-1.78793	3.80711e-07	3.98979e-06	Potri.017G130900
Potra001129g09927	76.5762	118.76	34.3926	0.289598	-1.78788	1.63886e-16	5.29212e-15	Potri.001G248700
Potra000394g01816	9.25529	14.3495	4.16104	0.289978	-1.78599	0.00049139	0.00270323	Potri.003G048600
Potra002104g16355	8.4341	13.0723	3.79588	0.290376	-1.78401	0.00372646	0.0160258	Potri.008G165600
Potra001493g12472	643.064	996.261	289.868	0.290956	-1.78113	3.21067e-30	2.69687e-28	Potri.010G128300
Potra001801g14583	13.6894	21.1988	6.17999	0.291525	-1.77831	0.000134571	0.0008486	Potri.004G185300
Potra003531g21922	188.695	292.163	85.2264	0.291709	-1.7774	3.5109e-33	3.44925e-31	Potri.005G186500
Potra000072g00262	79.5497	123.155	35.9448	0.291867	-1.77662	1.07836e-19	4.57039e-18	Potri.010G024900
Potra000616g04690	61.3287	94.9188	27.7386	0.292235	-1.7748	1.93115e-11	3.72751e-10	Potri.003G063400
Potra000039g00188	20.9458	32.374	9.51763	0.29399	-1.76616	1.26219e-06	1.1977e-05	Potri.001G218400
Potra002241g17223	63.9843	98.8937	29.0749	0.294001	-1.76611	6.59746e-09	9.18523e-08	Potri.003G202100
Potra009332g26339	591.207	913.609	268.806	0.294224	-1.76501	4.66995e-57	1.5834e-54	Potri.019G018100
Potra003782g22835	145.604	224.929	66.2786	0.294664	-1.76286	1.75692e-27	1.3026e-25	Potri.005G158000
Potra167732g27305	34.2339	52.8779	15.59	0.29483	-1.76204	5.35322e-09	7.55511e-08	Potri.006G021400
Potra000569g04206	506.016	781.376	230.655	0.29519	-1.76028	7.01684e-53	2.07542e-50	Potri.014G082100
Potra001453g12239	181.601	280.411	82.791	0.295249	-1.75999	9.19825e-08	1.06028e-06	Potri.006G278000
Potra000921g07466	57.6077	88.9333	26.2821	0.295526	-1.75864	4.65434e-13	1.06737e-11	Potri.005G039900
Potra000864g06976	144.008	222.267	65.7483	0.295807	-1.75727	7.31839e-18	2.64595e-16	Potri.015G009200
Potra183600g28319	16.6278	25.6565	7.59904	0.296184	-1.75544	1.71599e-05	0.000131251	Potri.006G208400
Potra002264g17371	440.822	679.982	201.662	0.296569	-1.75356	8.00801e-47	1.63711e-44	Potri.007G097100
Potra001104g09650	80.6961	124.413	36.9793	0.29723	-1.75035	4.8153e-09	6.83758e-08	Potri.009G002200
Potra006708g25758	93.6286	144.347	42.9103	0.297272	-1.75014	5.20542e-22	2.66041e-20	Potri.T092400
Potra004207g24683	41.3935	63.7905	18.9965	0.297795	-1.74761	8.96112e-06	7.25527e-05	Potri.018G129200
Potra001814g14650	268.178	413.183	123.173	0.298108	-1.74609	2.50543e-39	3.72506e-37	Potri.018G027100
Potra002423g18413	1121.75	1728.24	515.265	0.298144	-1.74592	8.90043e-31	7.66126e-29	Potri.010G188200
Potra000424g02224	59.7117	91.9389	27.4845	0.298943	-1.74206	1.77214e-10	3.03018e-09	Potri.010G053100
Potra002123g16462	8.50891	13.0975	3.92031	0.299318	-1.74025	0.00301146	0.0133198	Potri.001G044200
Potra001713g13941	73.6518	113.356	33.9475	0.299476	-1.73949	0.000733666	0.00384725	Potri.008G041800
Potra001821g14692	30.9514	47.6314	14.2713	0.29962	-1.7388	1.31489e-06	1.24262e-05	Potri.008G020500
Potra001764g14351	67.348	103.596	31.0998	0.300203	-1.73599	1.1138e-15	3.34057e-14	Potri.005G235200
Potra002405g18297	150.61	231.671	69.5487	0.300204	-1.73599	7.24933e-18	2.62439e-16	Potri.018G057000
Potra170266g27502	20.4248	31.4039	9.44573	0.300782	-1.73321	5.99279e-07	6.02377e-06	Potri.011G106200
Potra008915g26256	14.4287	22.1817	6.67569	0.300955	-1.73238	0.000130077	0.000823998	Potri.010G063300
Potra004281g24773	83.2747	128.019	38.5305	0.300975	-1.73229	9.75106e-21	4.53359e-19	Potri.014G044100
Potra000149g00527	94.5198	145.274	43.766	0.301266	-1.73089	3.85526e-14	9.96168e-13	Potri.002G106600
Potra001534g12737	104.081	159.937	48.2252	0.301527	-1.72964	6.89882e-17	2.2971e-15	Potri.003G183700
Potra003967g23823	69.4681	106.745	32.1907	0.301566	-1.72946	3.06537e-18	1.1643e-16	Potri.002G014000
Potra001063g09128	6.87415	10.5619	3.18645	0.301694	-1.72884	0.00208944	0.009666	Potri.011G037000
Potra002894g20250	209.684	322.044	97.3233	0.302205	-1.7264	2.05148e-26	1.40141e-24	Potri.004G213300
Potra001042g08820	18.6987	28.7053	8.69208	0.302804	-1.72354	2.85961e-05	0.000209612	Potri.008G180500
Potra003748g22676	46.2152	70.9339	21.4965	0.30305	-1.72237	2.48578e-12	5.23576e-11	Potri.013G086600
Potra000440g02419	10.0115	15.3638	4.65931	0.303265	-1.72135	0.00013049	0.000826371	Potri.012G069700
Potra002630g19613	213.844	328.161	99.526	0.303284	-1.72126	9.91417e-34	1.02852e-31	Potri.013G112300
Potra002351g34829	12.0623	18.4941	5.63048	0.304447	-1.71573	0.000191154	0.00116652	Potri.001G469700
Potra001633g13431	28.886	44.2883	13.4836	0.304451	-1.71572	1.42408e-07	1.58312e-06	Potri.010G095200
Potra003739g22645	4.87963	7.4815	2.27776	0.304453	-1.71571	0.0121806	0.0439796	Potri.008G123100
Potra001854g14851	58.5515	89.7597	27.3432	0.304627	-1.71488	4.75992e-13	1.09012e-11	Potri.005G216200
Potra000824g06575	50.6718	77.6765	23.6671	0.304688	-1.7146	8.07359e-07	7.89831e-06	Potri.014G026700
Potra001247g10731	6.19597	9.49746	2.89447	0.304762	-1.71424	0.00764494	0.0296035	Potri.008G099000
Potra180495g28103	7.40149	11.3443	3.45864	0.304878	-1.7137	0.00861917	0.0327241	Potri.001G205400
Potra004132g24573	9.37093	14.362	4.37985	0.30496	-1.71331	0.000832902	0.00430671	Potri.019G063600
Potra000582g04347	128.274	196.58	59.9671	0.305051	-1.71288	2.70427e-26	1.83382e-24	Potri.001G228000
Potra001875g35312	68.223	104.535	31.9108	0.305264	-1.71187	1.43734e-08	1.88857e-07	Potri.006G201900
Potra000511g03373	32.737	50.1549	15.3191	0.305436	-1.71106	1.37529e-09	2.07135e-08	Potri.001G152300
Potra003938g23642	97.1415	148.792	45.4907	0.305733	-1.70965	6.04242e-23	3.26209e-21	Potri.014G136800
Potra001448g12193	240.036	367.642	112.429	0.305812	-1.70929	4.36267e-32	3.97689e-30	Potri.001G333300
Potra000908g07365	7.78053	11.9142	3.64684	0.306091	-1.70797	0.00292498	0.0129909	Potri.010G174700
Potra003370g21472	484.183	741.168	227.197	0.306539	-1.70586	7.09026e-51	1.85972e-48	Potri.012G111500
Potra002728g19854	229.532	351.207	107.856	0.307102	-1.70321	1.06029e-25	6.96911e-24	Potri.008G159500
Potra002155g16663	52.7443	80.7006	24.788	0.30716	-1.70294	1.5701e-13	3.75999e-12	Potri.003G200800
Potra001181g10228	16.4183	25.1178	7.71876	0.307302	-1.70227	6.6454e-05	0.000450639	Potri.002G055400
Potra006403g25671	15.092	23.0833	7.10077	0.307616	-1.7008	0.000687483	0.00363893	Potri.001G395200
Potra000033g00170	75.0936	114.853	35.3341	0.307646	-1.70066	3.26135e-18	1.23033e-16	Potri.010G114200
Potra000991g08214	17.0829	26.1197	8.04605	0.308045	-1.69879	6.54906e-05	0.000444649	Potri.006G084700
Potra006145g25575	29.2073	44.6576	13.7571	0.308057	-1.69873	1.70178e-08	2.20683e-07	Potri.011G058000
Potra000891g07196	10.4298	15.9461	4.91342	0.308127	-1.6984	0.000375966	0.00213022	Potri.002G097800
Potra003973g23884	89.5816	136.953	42.21	0.308208	-1.69802	5.63882e-20	2.45346e-18	Potri.009G038400
Potra001215g10507	46.7196	71.416	22.0232	0.308379	-1.69722	2.17126e-11	4.15755e-10	Potri.003G149700
Potra150981g26678	81.0368	123.856	38.2178	0.308567	-1.69634	7.92711e-18	2.85489e-16	Potri.018G106600
Potra000008g00037	10.7775	16.472	5.08311	0.308591	-1.69623	0.00102931	0.00519098	Potri.001G159300
Potra000410g02012	14.6132	22.3259	6.90048	0.30908	-1.69395	1.29753e-05	0.000101792	Potri.001G181300
Potra000665g05147	83.646	127.793	39.4986	0.309082	-1.69394	5.01463e-07	5.12015e-06	Potri.011G148400
Potra003457g21729	62.4146	95.35	29.4791	0.309167	-1.69354	0.00337795	0.0147044	Potri.008G194100
Potra001751g14275	74.5046	113.801	35.2083	0.309386	-1.69252	1.85582e-17	6.47396e-16	Potri.004G034100
Potra004185g24671	10.847	16.5595	5.13436	0.310054	-1.68941	0.00195807	0.0091404	Potri.001G309700
Potra005080g25268	10.5937	16.1715	5.01592	0.310171	-1.68886	0.00256502	0.0115997	Potri.005G030100
Potra002321g17703	96.028	146.588	45.4677	0.310172	-1.68886	5.15247e-20	2.24536e-18	#N/A
Potra002482g18765	136.239	207.968	64.5097	0.31019	-1.68877	5.98457e-18	2.18645e-16	Potri.014G116000
Potra007918g26057	102.071	155.766	48.3767	0.310572	-1.687	6.07092e-20	2.63322e-18	Potri.005G219500
Potra001931g15301	37.5898	57.2981	17.8816	0.312079	-1.68001	2.81087e-09	4.09165e-08	Potri.014G136000
Potra002072g16153	17.9102	27.2968	8.52367	0.312259	-1.67919	3.42213e-06	2.99294e-05	Potri.014G111700
Potra002346g17917	233.256	355.459	111.054	0.312425	-1.67842	3.70687e-34	3.91871e-32	Potri.016G041900
Potra002958g20396	403.769	615.226	192.312	0.312588	-1.67767	1.31771e-12	2.87569e-11	Potri.003G166500
Potra008443g26162	13.6396	20.7792	6.50001	0.312814	-1.67663	0.00249621	0.0113088	Potri.008G193900
Potra002115g16428	620.305	944.986	295.624	0.312834	-1.67653	2.90137e-47	6.06517e-45	Potri.009G120000
Potra000567g04174	31.9826	48.7146	15.2506	0.31306	-1.67549	1.20586e-08	1.60644e-07	Potri.008G133800
Potra010386g26583	96.9025	147.59	46.2148	0.313129	-1.67517	2.73672e-21	1.32329e-19	Potri.019G055200
Potra001353g11599	68.3517	104.091	32.6127	0.31331	-1.67434	2.67169e-09	3.8911e-08	Potri.018G054800
Potra000636g04858	85.9857	130.937	41.0344	0.313391	-1.67397	6.42554e-19	2.55945e-17	Potri.005G071300
Potra000573g04255	26.3153	40.0622	12.5684	0.313722	-1.67244	2.93807e-07	3.13217e-06	Potri.011G129500
Potra003226g21063	6.69991	10.1987	3.20111	0.313874	-1.67174	0.00726789	0.0283447	Potri.014G174800
Potra001861g14895	1084.39	1650.59	518.189	0.313943	-1.67143	2.3563e-35	2.72968e-33	Potri.007G046100
Potra001634g13446	467.937	711.968	223.905	0.314487	-1.66893	4.3884e-29	3.50605e-27	Potri.017G100100
Potra002967g20414	24.2719	36.9193	11.6244	0.31486	-1.66722	1.03647e-06	9.95555e-06	Potri.001G411000
Potra000099g00330	86.3972	131.406	41.388	0.314962	-1.66675	3.04208e-17	1.04418e-15	Potri.005G241200
Potra000783g06181	13.7941	20.9798	6.6085	0.314994	-1.66661	5.70863e-05	0.000392573	Potri.010G211900
Potra190065g28743	367.646	559.031	176.261	0.315297	-1.66522	1.86238e-17	6.4887e-16	Potri.006G087200
Potra000523g32921	8.35072	12.6967	4.00473	0.315415	-1.66468	0.00667459	0.026389	Potri.001G074300
Potra174779g27751	78.8467	119.88	37.8135	0.315428	-1.66462	5.06145e-13	1.15442e-11	Potri.001G066900
Potra004422g24905	63.2201	96.1146	30.3255	0.315514	-1.66422	6.61134e-15	1.83999e-13	Potri.007G033900
Potra001767g14368	60.5799	92.0824	29.0775	0.315777	-1.66302	2.48508e-14	6.54286e-13	Potri.008G114400
Potra002335g17855	1492.3	2268.18	716.433	0.315863	-1.66263	1.34931e-48	3.12624e-46	Potri.014G096100
Potra002607g19561	8.23431	12.5151	3.95348	0.315896	-1.66248	0.00361141	0.0155913	Potri.003G101900
Potra001108g09711	80.0585	121.677	38.4401	0.315919	-1.66237	1.59766e-17	5.62276e-16	Potri.005G125600
Potra184591g34738	34.3328	52.1704	16.4953	0.316181	-1.66118	0.000234206	0.00139495	Potri.002G065300
Potra002572g19354	28.8246	43.7874	13.8617	0.316569	-1.65941	6.57488e-07	6.54499e-06	Potri.017G129300
Potra001116g09813	51.3872	78.0523	24.7221	0.316738	-1.65864	7.8113e-10	1.22285e-08	Potri.006G047300
Potra002063g16085	10.5235	15.9774	5.06973	0.317307	-1.65605	0.0002173	0.00130657	Potri.008G040100
Potra186602g33656	17.744	26.9337	8.55427	0.317605	-1.6547	3.29949e-05	0.000238957	Potri.T045500
Potra000795g06305	43.0859	65.3995	20.7722	0.31762	-1.65463	0.00013162	0.000831929	Potri.007G000700
Potra003767g35391	33.5645	50.9245	16.2046	0.318207	-1.65196	7.42513e-08	8.71059e-07	Potri.008G087100
Potra004127g32553	11.4852	17.411	5.55944	0.319307	-1.64698	0.00136004	0.00664322	Potri.001G286800
Potra174512g27727	111.759	169.414	54.1045	0.319362	-1.64674	1.26369e-15	3.77384e-14	Potri.019G002200
Potra000352g01304	213.281	323.072	103.491	0.320333	-1.64235	1.86324e-33	1.87017e-31	Potri.014G042300
Potra001781g14489	10.3676	15.702	5.03314	0.320542	-1.64142	0.000595197	0.00320268	Potri.010G195900
Potra005232g25329	39.1355	59.2266	19.0444	0.32155	-1.63688	1.9477e-10	3.30395e-09	Potri.009G140400
Potra002272g17419	1396.3	2112.83	679.78	0.321739	-1.63604	9.85247e-61	3.85814e-58	Potri.009G096600
Potra000785g06221	96.4754	145.912	47.0387	0.322377	-1.63318	8.93101e-19	3.53213e-17	Potri.006G108200
Potra001310g11259	43.2557	65.4181	21.0934	0.322439	-1.6329	2.87059e-11	5.42194e-10	Potri.011G075500
Potra002503g18898	169.917	256.946	82.8879	0.322588	-1.63223	1.41038e-27	1.05128e-25	Potri.016G101700
Potra003782g32357	824.759	1247.12	402.396	0.322659	-1.63192	1.5576e-51	4.33059e-49	Potri.002G103300
Potra001218g10529	23.1423	34.9848	11.2997	0.322988	-1.63045	8.74329e-08	1.01119e-06	Potri.003G125600
Potra002594g31951	281.204	425.085	137.323	0.323049	-1.63018	2.07983e-39	3.1089e-37	Potri.016G052100
Potra000554g03988	12.8273	19.3894	6.26527	0.323129	-1.62982	0.000543384	0.00295419	Potri.001G179400
Potra001257g10844	105.3	159.141	51.4593	0.323356	-1.6288	1.23883e-21	6.1287e-20	Potri.009G129400
Potra002253g17305	38.6973	58.4813	18.9134	0.323409	-1.62857	1.07201e-09	1.64531e-08	Potri.009G083800
Potra000640g04878	116.08	175.394	56.7655	0.323645	-1.62751	2.40143e-14	6.33464e-13	Potri.002G110200
Potra000869g06999	16.8543	25.4623	8.24634	0.323865	-1.62654	0.000180148	0.00110787	Potri.002G222700
Potra000797g06321	209.045	315.734	102.355	0.324181	-1.62513	1.54645e-10	2.67056e-09	Potri.002G154100
Potra001002g08335	6.39707	9.66023	3.13392	0.324414	-1.62409	0.0106265	0.0391322	Potri.018G131100
Potra001744g14205	147.238	222.311	72.1641	0.324609	-1.62323	8.63584e-12	1.73109e-10	Potri.002G077900
Potra000888g07175	19.1327	28.8868	9.37854	0.324665	-1.62298	0.000832865	0.00430671	Potri.014G012100
Potra002402g18271	16.9276	25.5564	8.29888	0.324728	-1.62269	8.12417e-05	0.000540969	Potri.005G162500
Potra001204g10396	27.7156	41.8404	13.5908	0.324826	-1.62226	8.24237e-08	9.58839e-07	Potri.002G152200
Potra000542g03824	223.982	338.071	109.893	0.325059	-1.62123	0.000102418	0.000664846	Potri.001G032500
Potra002445g18531	42.1665	63.6402	20.6929	0.325155	-1.6208	3.16603e-07	3.35974e-06	Potri.006G115000
Potra002426g18434	104.498	157.651	51.3454	0.325691	-1.61842	9.6766e-10	1.49549e-08	Potri.001G158000
Potra167069g27254	76.3703	115.191	37.5499	0.32598	-1.61714	2.67747e-12	5.62673e-11	Potri.016G064600
Potra000797g06322	99.4715	150.019	48.9242	0.32612	-1.61653	1.29913e-11	2.54903e-10	Potri.002G154100
Potra000598g04545	195.179	294.316	96.0416	0.326321	-1.61564	1.67892e-28	1.31121e-26	Potri.001G019100
Potra006097g25566	33.1698	50.0106	16.329	0.326511	-1.6148	8.21074e-09	1.12399e-07	Potri.013G126600
Potra002602g19539	9.87188	14.8816	4.86217	0.326724	-1.61386	0.00260899	0.0117756	Potri.017G064100
Potra001161g10075	133.327	200.981	65.6735	0.326764	-1.61368	6.96045e-15	1.92943e-13	Potri.012G014000
Potra000520g03516	325.282	490.296	160.268	0.32688	-1.61317	1.58053e-40	2.54008e-38	Potri.010G125200
Potra000501g03232	188.195	283.634	92.7561	0.327028	-1.61251	0.0028083	0.0125489	Potri.004G084100
Potra002400g18263	11.0246	16.6096	5.43972	0.327505	-1.61041	0.005574	0.0226504	Potri.008G121800
Potra000904g07338	555.052	836.151	273.953	0.327635	-1.60984	1.19349e-50	3.07245e-48	Potri.001G189500
Potra000351g01293	636.324	958.464	314.185	0.3278	-1.60911	2.15037e-24	1.30254e-22	#N/A
Potra000636g04859	337.667	508.57	166.764	0.327907	-1.60864	7.51635e-38	1.0047e-35	Potri.005G071500
Potra002427g18440	90.7537	136.653	44.8548	0.328239	-1.60718	1.6034e-18	6.21749e-17	Potri.011G033000
Potra000365g35021	42.343	63.7404	20.9457	0.32861	-1.60555	1.44352e-09	2.16825e-08	Potri.004G006200
Potra000527g03647	470.525	708.262	232.788	0.328676	-1.60526	2.49837e-44	4.69338e-42	Potri.011G007100
Potra001034g08727	68.0314	102.394	33.6692	0.328821	-1.60463	1.99602e-13	4.71499e-12	Potri.009G166900
Potra000729g05735	218.33	328.498	108.162	0.329264	-1.60269	1.36725e-11	2.67326e-10	Potri.014G018900
Potra004268g24757	174.889	263.131	86.648	0.329296	-1.60254	2.33691e-26	1.59248e-24	Potri.010G063500
Potra000243g00963	8.47716	12.7467	4.20759	0.330092	-1.59906	0.0106995	0.0393595	Potri.011G112000
Potra005449g25400	5.99716	9.01544	2.97888	0.33042	-1.59763	0.0129968	0.0464161	Potri.005G130900
Potra002101g16341	36.4173	54.7248	18.1098	0.330924	-1.59543	1.81315e-09	2.68858e-08	Potri.001G138800
Potra001622g13347	293.12	440.454	145.787	0.330992	-1.59513	5.48351e-30	4.55099e-28	Potri.018G026400
Potra001636g13455	10.5662	15.877	5.25536	0.331004	-1.59508	0.00213581	0.00986246	Potri.006G141100
Potra000736g05800	29.6704	44.5699	14.7709	0.331409	-1.59332	8.11347e-08	9.45427e-07	Potri.006G267300
Potra007987g26074	11.7539	17.6551	5.8527	0.331502	-1.59291	0.00138914	0.00677227	Potri.T079400
Potra174787g27752	60.0951	90.2605	29.9298	0.331593	-1.59251	1.32331e-11	2.59098e-10	Potri.010G002500
Potra003756g22712	329.283	494.264	164.301	0.332415	-1.58894	8.60555e-37	1.08755e-34	Potri.002G075400
Potra000987g08155	796.846	1195.91	397.783	0.33262	-1.58805	1.46033e-32	1.38101e-30	Potri.001G468700
Potra010309g26559	10.454	15.6892	5.21878	0.332635	-1.58799	0.0028237	0.0126015	Potri.003G188800
Potra008967g26265	784.353	1177.02	391.686	0.332777	-1.58737	8.531e-43	1.49175e-40	Potri.017G075500
Potra000575g04280	179.858	269.894	89.8225	0.332807	-1.58724	1.58377e-17	5.58093e-16	Potri.001G248800
Potra000640g04885	265.893	398.971	132.816	0.332896	-1.58685	2.88441e-33	2.87439e-31	Potri.002G109300
Potra001298g11179	28.0185	42.0344	14.0025	0.333121	-1.58588	1.33204e-07	1.49033e-06	Potri.001G240500
Potra008356g26148	16.5907	24.88	8.30144	0.333659	-1.58355	8.26065e-05	0.000549452	Potri.006G204400
Potra000851g06881	268.408	402.35	134.465	0.3342	-1.58122	1.31026e-11	2.56725e-10	Potri.014G113000
Potra194901g28996	94.6112	141.818	47.4048	0.334266	-1.58093	9.48629e-18	3.40319e-16	Potri.011G158400
Potra003454g21718	541.172	811.113	271.231	0.334394	-1.58038	6.51307e-14	1.64024e-12	Potri.002G132900
Potra183594g28318	1360.54	2039.19	681.899	0.334397	-1.58036	5.55831e-56	1.81809e-53	Potri.009G148800
Potra001163g10102	111.819	167.587	56.0511	0.334461	-1.58009	1.36214e-18	5.32651e-17	Potri.013G130000
Potra001259g10864	663.202	993.958	332.447	0.334468	-1.58006	3.65707e-48	8.33423e-46	Potri.005G108700
Potra000640g04880	63.8436	95.6641	32.0232	0.334746	-1.57886	2.61032e-14	6.86609e-13	Potri.002G110000
Potra000957g07856	339.394	508.538	170.249	0.334782	-1.57871	4.92876e-33	4.82515e-31	Potri.017G055000
Potra002263g17364	49.0841	73.5386	24.6296	0.33492	-1.57811	2.05845e-12	4.37882e-11	Potri.002G250000
Potra002246g17253	20.9291	31.3475	10.5107	0.335297	-1.57649	1.44068e-06	1.35094e-05	Potri.001G120000
Potra002765g19933	10.1631	15.2198	5.10632	0.335504	-1.5756	0.000181775	0.00111688	Potri.002G065600
Potra007905g26055	23.1319	34.6407	11.6231	0.335534	-1.57547	1.45911e-06	1.36729e-05	Potri.009G022500
Potra197169g29203	31.1006	46.5612	15.64	0.335901	-1.57389	1.14839e-06	1.0957e-05	Potri.004G236600
Potra000454g02582	95.8191	143.414	48.2238	0.336255	-1.57237	1.19652e-17	4.2378e-16	Potri.003G046800
Potra003170g20890	1278.65	1913.6	643.69	0.336376	-1.57185	1.04011e-18	4.10186e-17	Potri.015G073800
Potra010222g26527	330.316	493.97	166.662	0.337394	-1.56749	2.81252e-36	3.46002e-34	Potri.002G037500
Potra009091g33486	8.91288	13.3228	4.50299	0.337993	-1.56494	0.00326449	0.0142866	Potri.004G219800
Potra002163g16708	138.272	206.629	69.915	0.33836	-1.56337	9.35367e-24	5.36206e-22	Potri.017G084200
Potra001606g13237	32.1565	48.0386	16.2743	0.338775	-1.5616	6.43005e-09	8.96563e-08	Potri.003G210800
Potra191685g28764	1705.31	2547.2	863.417	0.338968	-1.56078	6.67836e-58	2.38049e-55	Potri.003G141900
Potra000832g06669	40.3485	60.2595	20.4375	0.339158	-1.55997	0.000848519	0.0043785	Potri.007G056400
Potra008732g26224	13.1325	19.6086	6.65633	0.339459	-1.55869	0.000542367	0.00294923	Potri.011G131100
Potra181319g28147	10.9401	16.3341	5.54606	0.339539	-1.55835	0.00787418	0.0303646	Potri.001G367500
Potra001247g10734	361.433	539.481	183.385	0.339928	-1.5567	1.3242e-19	5.5447e-18	Potri.008G099400
Potra003974g23900	7.21247	10.7622	3.66278	0.340339	-1.55496	0.00966828	0.0360948	Potri.006G100600
Potra001257g10843	88.5792	132.164	44.9947	0.340447	-1.5545	2.4143e-16	7.68898e-15	Potri.009G129200
Potra000892g07223	16.6842	24.8925	8.47584	0.340498	-1.55428	9.39876e-05	0.00061587	Potri.017G036700
Potra003351g21420	61.495	91.6881	31.3018	0.341395	-1.55049	1.90496e-13	4.52681e-12	Potri.017G059800
Potra001047g08885	61.228	91.2876	31.1683	0.34143	-1.55034	1.45631e-13	3.50257e-12	Potri.012G126500
Potra000571g04219	29.2828	43.6436	14.922	0.341907	-1.54833	7.44544e-07	7.33282e-06	Potri.012G007600
Potra000864g06980	17.5001	26.0821	8.91815	0.341925	-1.54825	2.11233e-05	0.000158516	Potri.006G236800
Potra161077g26900	38.2984	57.0788	19.518	0.341948	-1.54815	2.38377e-09	3.49188e-08	Potri.014G084900
Potra001323g11353	79.1927	118.014	40.3712	0.342088	-1.54756	7.50694e-11	1.34136e-09	Potri.005G243400
Potra000700g05450	99.7692	148.667	50.8715	0.342184	-1.54715	6.33357e-17	2.11395e-15	Potri.018G081200
Potra002277g17459	453.65	675.868	231.432	0.342421	-1.54615	4.81814e-19	1.93303e-17	Potri.004G188600
Potra000982g08122	48.5776	72.3425	24.8126	0.342988	-1.54377	2.03675e-10	3.43614e-09	Potri.019G086200
Potra003910g23469	122.516	182.38	62.6528	0.343529	-1.5415	8.07985e-06	6.60135e-05	Potri.018G125000
Potra000458g02656	66.7185	99.295	34.1421	0.343845	-1.54017	9.16159e-13	2.03776e-11	Potri.001G330800
Potra000959g07875	138.386	205.928	70.8443	0.344024	-1.53942	7.67088e-24	4.43453e-22	Potri.005G114400
Potra001029g08631	11.5322	17.1605	5.90395	0.344043	-1.53934	0.000898453	0.00461275	Potri.012G089400
Potra154050g34489	13.9638	20.773	7.15459	0.344418	-1.53777	0.000364522	0.00207171	Potri.010G002500
Potra001329g11420	23.4361	34.8534	12.0189	0.344842	-1.53599	0.000174529	0.0010764	Potri.014G143400
Potra000009g00045	8.94197	13.2978	4.58613	0.344878	-1.53584	0.00431761	0.0181828	Potri.005G051700
Potra002486g18798	850.769	1264.83	436.703	0.345265	-1.53422	3.82201e-49	9.00538e-47	Potri.014G095800
Potra005431g25392	129.458	192.461	66.4547	0.34529	-1.53412	4.39169e-19	1.77216e-17	Potri.012G078400
Potra000958g07862	58.3636	86.7545	29.9728	0.34549	-1.53329	1.39066e-12	3.02302e-11	Potri.014G051900
Potra000503g03263	24.6134	36.5813	12.6456	0.345683	-1.53248	1.15118e-05	9.1108e-05	Potri.014G156800
Potra003920g23521	99.7126	148.185	51.2406	0.345789	-1.53204	6.28248e-17	2.09942e-15	Potri.012G002200
Potra000405g01943	13.8029	20.5038	7.10206	0.346378	-1.52958	0.000331022	0.00189839	Potri.008G200500
Potra000203g00873	402.062	597.249	206.875	0.34638	-1.52957	4.58444e-38	6.2481e-36	Potri.007G131600
Potra000244g00964	10.613	15.7644	5.46165	0.346454	-1.52926	0.00287465	0.0128001	Potri.009G016600
Potra002035g15909	662.64	984.247	341.034	0.346492	-1.52911	7.87007e-38	1.04695e-35	Potri.003G138100
Potra000678g05258	332.757	494.096	171.418	0.346932	-1.52728	1.6974e-36	2.11627e-34	Potri.011G146300
Potra002384g18152	13.0917	19.4393	6.74417	0.346935	-1.52726	0.00275895	0.0123601	Potri.013G034900
Potra004180g24665	16.699	24.7924	8.60552	0.347103	-1.52657	0.000402191	0.00226404	Potri.004G111100
Potra001586g13113	123.031	182.631	63.4305	0.347315	-1.52568	9.65708e-18	3.45554e-16	Potri.009G074100
Potra001066g09175	588.02	872.738	303.302	0.34753	-1.52479	3.00863e-27	2.16707e-25	Potri.011G154600
Potra002193g16904	224.424	333.089	115.76	0.347535	-1.52477	4.4164e-28	3.3549e-26	Potri.T052100
Potra000353g01333	15.9823	23.7156	8.24891	0.347826	-1.52356	0.00149491	0.00721328	Potri.003G169600
Potra007927g26060	60.889	90.3484	31.4297	0.347872	-1.52337	1.03084e-12	2.27826e-11	Potri.016G061000
Potra003980g23956	16.8387	24.9801	8.6972	0.348165	-1.52216	2.37472e-05	0.000176583	Potri.006G233600
Potra001280g11048	49.1263	72.8748	25.3777	0.348236	-1.52186	1.21778e-09	1.85016e-08	Potri.010G003000
Potra001419g12022	13.3142	19.7339	6.89449	0.349373	-1.51716	0.00050466	0.00276965	Potri.009G149900
Potra004020g24294	12.1178	17.9556	6.27993	0.349747	-1.51561	0.0056295	0.0228425	Potri.011G144300
Potra001519g12647	50.6508	75.0346	26.267	0.350065	-1.5143	2.38253e-05	0.000177116	Potri.017G122400
Potra003337g21387	415.49	615.24	215.74	0.35066	-1.51185	5.47162e-21	2.62289e-19	Potri.012G121700
Potra161458g26941	61.6795	91.3311	32.0279	0.350679	-1.51178	0.00141639	0.00688097	Potri.007G037700
Potra001586g13114	12.3292	18.2561	6.40222	0.350689	-1.51174	0.00102856	0.00518815	Potri.009G074200
Potra001059g09090	141.66	209.741	73.5792	0.35081	-1.51124	1.18706e-16	3.87824e-15	Potri.013G051300
Potra003673g22394	63.0715	93.3787	32.7643	0.350876	-1.51097	8.2027e-13	1.83033e-11	Potri.006G049400
Potra004022g24323	10.0739	14.913	5.23472	0.351016	-1.51039	0.00321707	0.0141168	Potri.T047200
Potra000177g00678	23.675	35.0477	12.3023	0.351017	-1.51039	1.65702e-05	0.000127336	Potri.013G134800
Potra001402g11909	93.0444	137.723	48.3655	0.351179	-1.50972	8.60299e-16	2.59706e-14	Potri.004G161400
Potra001077g09302	140.43	207.806	73.0539	0.35155	-1.5082	4.97123e-23	2.71542e-21	Potri.002G082400
Potra004350g24838	1118.74	1655.04	582.442	0.351921	-1.50668	5.55672e-21	2.6591e-19	Potri.001G449500
Potra000715g05595	40.3019	59.577	21.0267	0.352933	-1.50253	1.1632e-08	1.55557e-07	Potri.016G136500
Potra001684g13783	139.255	205.839	72.6708	0.353046	-1.50207	7.0945e-21	3.36028e-19	Potri.007G005600
Potra002590g19479	2231.01	3295.78	1166.23	0.353856	-1.49876	1.41418e-35	1.66604e-33	Potri.001G455000
Potra002461g31872	8.71002	12.8658	4.55424	0.353981	-1.49826	0.00852911	0.0324487	Potri.001G398400
Potra000889g07183	546.718	807.458	285.978	0.35417	-1.49748	3.87231e-43	6.85744e-41	Potri.006G177700
Potra003787g22861	72.5378	107.115	37.9612	0.354398	-1.49656	2.00311e-13	4.72771e-12	Potri.001G349900
Potra007768g26023	17.3281	25.5876	9.06847	0.354408	-1.49652	8.93578e-05	0.000589282	#N/A
Potra000743g05864	462.457	682.761	242.152	0.354666	-1.49547	2.32187e-37	2.97488e-35	Potri.001G406500
Potra001724g14031	28.2905	41.7589	14.8221	0.354945	-1.49433	3.83604e-07	4.01708e-06	Potri.012G079200
Potra002436g18482	111.445	164.5	58.3901	0.354956	-1.49429	4.24171e-07	4.3939e-06	Potri.019G061700
Potra000602g04571	403.645	595.482	211.808	0.355693	-1.4913	4.15226e-35	4.73136e-33	Potri.002G052300
Potra002674g19721	14.0599	20.7418	7.3781	0.355712	-1.49122	0.000246916	0.00146219	Potri.008G008700
Potra001733g14102	58.3065	85.9782	30.6347	0.356308	-1.4888	1.97773e-07	2.16143e-06	Potri.001G031800
Potra192299g28799	669.746	987.21	352.282	0.356847	-1.48662	4.24433e-39	6.27687e-37	Potri.006G097300
Potra003909g32440	60.9437	89.8168	32.0706	0.357067	-1.48573	2.88302e-10	4.76555e-09	Potri.018G098500
Potra000426g02245	82.0962	120.963	43.229	0.357373	-1.4845	1.92151e-08	2.46761e-07	Potri.016G112600
Potra000740g05836	25.0783	36.9382	13.2183	0.357848	-1.48258	1.85535e-06	1.70376e-05	Potri.015G127400
Potra196068g29083	58.4353	86.0661	30.8044	0.357916	-1.48231	4.65782e-11	8.58763e-10	Potri.005G141400
Potra004111g24522	29.9927	44.1693	15.8161	0.358078	-1.48165	2.16818e-06	1.96743e-05	Potri.015G071900
Potra167387g27272	443.319	652.434	234.203	0.358968	-1.47807	1.47822e-25	9.60256e-24	Potri.014G096000
Potra004014g24229	84.4839	124.325	44.6425	0.359079	-1.47763	1.19474e-12	2.6176e-11	Potri.012G058000
Potra161988g26986	9.39047	13.8176	4.96338	0.359208	-1.47711	0.00358439	0.0154915	#N/A
Potra181399g34792	45.709	67.2526	24.1653	0.359322	-1.47665	1.93824e-09	2.85731e-08	Potri.016G127300
Potra010112g26489	1348.41	1983.87	712.946	0.359372	-1.47645	3.73667e-11	6.95852e-10	Potri.011G158700
Potra000839g06764	73.6928	108.417	38.9685	0.359431	-1.47621	1.03548e-12	2.28488e-11	Potri.011G034400
Potra000869g07001	38.6953	56.8972	20.4935	0.360184	-1.4732	3.77983e-08	4.66448e-07	Potri.002G217900
Potra001878g14983	8.36531	12.2961	4.43452	0.360644	-1.47135	0.00721229	0.0281594	Potri.T027700
Potra000950g07792	616.947	906.723	327.172	0.360829	-1.47061	1.12085e-38	1.5739e-36	Potri.009G136400
Potra000184g00741	10.7484	15.7957	5.7011	0.360927	-1.47022	0.00220029	0.0101165	Potri.006G064900
Potra001553g12866	36.4088	53.4977	19.32	0.361136	-1.46939	8.43125e-06	6.86626e-05	Potri.004G102000
Potra000668g05175	11336.5	16655.6	6017.47	0.361288	-1.46878	3.26995e-50	8.19049e-48	Potri.001G304800
Potra002915g20298	10.5425	15.489	5.59603	0.36129	-1.46877	0.00771456	0.0298149	Potri.001G320200
Potra003767g22760	324.654	476.928	172.381	0.36144	-1.46817	2.10232e-11	4.03666e-10	Potri.008G087600
Potra003440g21670	184	270.207	97.7931	0.36192	-1.46626	4.06626e-18	1.51955e-16	Potri.001G237000
Potra000475g02883	49.2005	72.2487	26.1524	0.361978	-1.46603	4.68238e-10	7.52946e-09	Potri.012G019100
Potra000930g07586	33.1422	48.6583	17.6262	0.362244	-1.46497	3.33968e-07	3.53322e-06	Potri.001G037900
Potra001154g10028	135.203	198.496	71.9095	0.362272	-1.46486	4.30163e-20	1.88641e-18	Potri.015G104800
Potra001085g09394	42.9732	63.0829	22.8634	0.362435	-1.46421	4.82797e-09	6.85207e-08	Potri.002G200000
Potra001160g10067	244.864	359.309	130.418	0.362968	-1.46208	5.17528e-26	3.46719e-24	Potri.010G119400
Potra002580g19394	269.658	395.658	143.658	0.363086	-1.46162	1.14319e-28	8.97854e-27	Potri.013G156200
Potra001328g11413	9.34204	13.7047	4.97933	0.363329	-1.46065	0.00691921	0.0271831	Potri.001G310100
Potra002555g19242	43.7479	64.1661	23.3298	0.363585	-1.45963	2.15264e-09	3.16833e-08	Potri.015G147400
Potra005373g25377	23.7984	34.8975	12.6994	0.363905	-1.45837	2.22985e-06	2.01812e-05	Potri.009G140400
Potra001159g10059	8.91471	13.0723	4.7571	0.363907	-1.45836	0.00562788	0.0228393	Potri.010G230400
Potra002340g17876	29.1229	42.7044	15.5413	0.363927	-1.45828	3.05329e-07	3.24878e-06	Potri.014G070400
Potra000625g04760	447.439	656.047	238.832	0.364047	-1.4578	1.00254e-12	2.21747e-11	Potri.002G018600
Potra003197g20976	122.219	179.169	65.2682	0.364282	-1.45687	6.7833e-12	1.37661e-10	Potri.015G076700
Potra001361g11641	751.989	1102.34	401.641	0.364354	-1.45659	5.45094e-44	1.00366e-41	Potri.013G123800
Potra003882g23316	66.2059	97.0471	35.3647	0.364407	-1.45638	2.91482e-11	5.49801e-10	Potri.006G081600
Potra001821g14689	22.4211	32.8624	11.9797	0.364543	-1.45584	0.000168981	0.00104567	Potri.008G020100
Potra001866g14931	19.6456	28.7865	10.5047	0.364919	-1.45435	0.00220541	0.0101367	Potri.001G299000
Potra000832g06671	25.3308	37.1073	13.5542	0.365271	-1.45296	5.32667e-06	4.4783e-05	Potri.007G056300
Potra002110g16390	97.7099	143.132	52.2876	0.365309	-1.45281	1.22719e-07	1.38416e-06	Potri.012G042200
Potra000762g06019	84.1696	123.292	45.047	0.365368	-1.45258	1.74233e-06	1.60884e-05	Potri.006G198800
Potra001005g08364	95.0704	139.25	50.8906	0.365461	-1.45221	6.01048e-08	7.15979e-07	Potri.017G082700
Potra001624g13358	13.0647	19.1265	7.00298	0.366141	-1.44953	0.00164528	0.00783551	Potri.016G075100
Potra000180g00716	46.4404	67.985	24.8958	0.366195	-1.44932	1.64221e-08	2.13656e-07	Potri.008G068600
Potra003601g22124	104.803	153.4	56.2052	0.366396	-1.44852	1.48229e-13	3.55778e-12	Potri.006G026500
Potra000794g06299	18.9099	27.6722	10.1477	0.366712	-1.44728	0.000686839	0.00363668	Potri.009G153800
Potra001078g09320	18.7583	27.4468	10.0697	0.366881	-1.44662	5.5697e-05	0.00038435	Potri.006G107600
Potra000464g32705	7.68125	11.238	4.12445	0.367008	-1.44611	0.0119481	0.0432488	Potri.008G064300
Potra001989g15644	7.33108	10.7246	3.93754	0.36715	-1.44556	0.0132876	0.0472363	Potri.010G168200
Potra002042g15967	76.7216	112.223	41.2199	0.367303	-1.44496	9.18453e-12	1.82921e-10	Potri.003G198200
Potra002489g18814	71.866	105.111	38.621	0.36743	-1.44446	1.18203e-12	2.59385e-11	Potri.013G150500
Potra002015g15809	10.0939	14.7628	5.42506	0.367481	-1.44426	0.0100367	0.0373011	Potri.006G214400
Potra000366g01493	345.924	505.623	186.226	0.36831	-1.44101	1.16387e-24	7.1433e-23	Potri.001G292800
Potra004513g25013	66.0935	96.5901	35.5968	0.368535	-1.44013	9.55874e-12	1.89965e-10	Potri.017G013300
Potra000441g02436	21.8069	31.8672	11.7467	0.368615	-1.43981	2.7762e-06	2.46919e-05	Potri.015G127800
Potra003955g23744	8.58146	12.5402	4.62272	0.368632	-1.43975	0.00754371	0.0292807	Potri.T021600
Potra005649g36257	7.01878	10.2551	3.78251	0.368843	-1.43892	0.013909	0.048988	#N/A
Potra001356g11621	28.4119	41.5086	15.3152	0.368965	-1.43844	2.2331e-05	0.000166811	Potri.013G052500
Potra006395g25670	156.972	229.311	84.6324	0.369073	-1.43802	4.49961e-23	2.46265e-21	Potri.014G147600
Potra004317g24810	9.52029	13.9049	5.13564	0.369339	-1.43698	0.00508411	0.0209418	Potri.010G002600
Potra002127g16493	20.8702	30.4773	11.2631	0.369558	-1.43613	3.63241e-05	0.000260585	Potri.006G245900
Potra001240g10651	38.1343	55.6829	20.5857	0.369695	-1.43559	8.75103e-07	8.52206e-06	Potri.017G130300
Potra001934g15331	20.8275	30.3957	11.2593	0.370422	-1.43276	0.000240515	0.00142703	Potri.002G182000
Potra000942g07711	206.311	301.047	111.575	0.370624	-1.43197	3.95768e-25	2.48949e-23	Potri.004G156000
Potra001763g14344	832.558	1214.86	450.257	0.370625	-1.43197	1.28302e-10	2.23647e-09	Potri.005G211500
Potra000351g01292	65.1867	95.1125	35.2609	0.370728	-1.43157	1.12225e-11	2.21763e-10	Potri.006G018000
Potra000524g03576	34.4191	50.1924	18.6459	0.371489	-1.42861	3.19237e-08	3.98016e-07	Potri.003G053600
Potra000026g00128	41.7741	60.917	22.6313	0.37151	-1.42853	2.27307e-08	2.89501e-07	Potri.004G235600
Potra000605g04598	622.547	907.805	337.288	0.371543	-1.4284	2.01719e-39	3.03156e-37	Potri.013G041000
Potra002334g17837	7.82873	11.4133	4.24418	0.371863	-1.42716	0.0104141	0.0384163	Potri.008G088500
Potra000982g08121	18.0557	26.3199	9.79152	0.372019	-1.42655	0.00569332	0.0230513	Potri.013G115600
Potra000436g02372	32.2754	47.0431	17.5077	0.372164	-1.42599	6.71566e-07	6.6708e-06	Potri.006G070600
Potra003926g23554	17.5445	25.5688	9.52019	0.372336	-1.42532	9.75121e-05	0.000636714	Potri.010G049600
Potra002497g18860	74.3731	108.373	40.3733	0.372541	-1.42453	8.59162e-08	9.94888e-07	Potri.006G226800
Potra000818g06513	1213.92	1768.83	659.014	0.372571	-1.42441	1.00084e-42	1.73915e-40	Potri.005G222500
Potra001483g12391	41.218	60.0027	22.4332	0.37387	-1.41939	1.57807e-06	1.46887e-05	Potri.017G136000
Potra002128g31652	35.8567	52.1892	19.5241	0.374102	-1.4185	1.47324e-06	1.37961e-05	Potri.002G068100
Potra004022g24316	251.158	365.45	136.865	0.37451	-1.41692	4.47386e-15	1.26153e-13	Potri.005G033600
Potra002662g19694	79.906	116.255	43.5572	0.37467	-1.41631	1.94302e-11	3.74631e-10	Potri.008G168700
Potra003108g20756	119.377	173.678	65.0756	0.37469	-1.41623	1.92172e-16	6.18397e-15	Potri.003G087700
Potra000431g02284	501.346	729.31	273.381	0.374849	-1.41562	6.24416e-35	6.94426e-33	Potri.013G072800
Potra001662g13654	119.94	174.474	65.4051	0.37487	-1.41554	3.02988e-20	1.35e-18	Potri.010G235600
Potra193254g28868	13.3046	19.352	7.25709	0.375004	-1.41502	0.00115002	0.00572554	Potri.017G053600
Potra000582g04348	1449.89	2108.41	791.378	0.375344	-1.41372	2.28143e-45	4.49862e-43	Potri.001G228100
Potra000976g08085	193.044	280.68	105.407	0.375543	-1.41295	4.7412e-19	1.90491e-17	Potri.013G083300
Potra000177g00680	402.129	584.651	219.608	0.375622	-1.41265	1.05851e-33	1.08999e-31	Potri.013G135200
Potra000352g01310	451.432	656.292	246.571	0.375704	-1.41233	9.79679e-27	6.82657e-25	Potri.014G043100
Potra000857g06934	352.122	511.895	192.35	0.37576	-1.41212	6.94245e-33	6.67892e-31	Potri.005G073300
Potra001548g12828	102.443	148.923	55.9633	0.375786	-1.41202	7.38523e-07	7.2761e-06	Potri.008G148000
Potra002480g18759	1926.89	2801.06	1052.72	0.375828	-1.41186	1.91102e-40	3.05357e-38	Potri.007G081000
Potra004042g24370	211.687	307.689	115.685	0.375979	-1.41128	2.68363e-25	1.71131e-23	Potri.009G116300
Potra001607g13245	11.1349	16.1777	6.09215	0.376578	-1.40898	0.00325698	0.014259	Potri.016G017700
Potra001703g13896	25.3573	36.8318	13.8828	0.376924	-1.40765	3.79441e-06	3.2916e-05	Potri.010G115600
Potra002637g19627	42.2186	61.3175	23.1197	0.377049	-1.40718	2.35568e-08	2.99337e-07	Potri.008G192900
Potra000523g03553	10.9078	15.8397	5.97585	0.377271	-1.40633	0.00358596	0.0154959	Potri.001G075000
Potra000945g07746	121.758	176.784	66.732	0.377478	-1.40554	3.61568e-12	7.53574e-11	Potri.018G100500
Potra000013g00068	19.9482	28.956	10.9405	0.377833	-1.40418	8.12534e-05	0.000540969	Potri.012G095600
Potra000498g32778	30.0735	43.6497	16.4974	0.37795	-1.40373	9.81271e-06	7.8714e-05	Potri.005G148200
Potra175986g27849	419.291	608.448	230.133	0.37823	-1.40267	2.68942e-35	3.08984e-33	Potri.008G151000
Potra003115g20776	31.56	45.7845	17.3355	0.378632	-1.40113	1.37524e-05	0.000107283	Potri.016G064300
Potra001028g08623	17.3577	25.1805	9.53485	0.37866	-1.40103	0.00029168	0.00169799	Potri.T035400
Potra179682g28040	259.362	376.225	142.499	0.37876	-1.40064	9.24432e-14	2.29073e-12	Potri.001G105900
Potra001586g13115	1012.7	1468.98	556.43	0.378787	-1.40054	1.71026e-42	2.93521e-40	Potri.009G074300
Potra003836g23052	33.6485	48.8087	18.4883	0.378792	-1.40052	1.81566e-07	1.99607e-06	Potri.004G176100
Potra000404g01935	149.231	216.452	82.0111	0.378889	-1.40015	3.99621e-19	1.61727e-17	Potri.008G006300
Potra198294g29307	9.96675	14.4559	5.47759	0.378917	-1.40005	0.0131283	0.0467655	Potri.004G056500
Potra001813g14643	97.6455	141.567	53.7238	0.379494	-1.39785	2.51514e-13	5.87635e-12	Potri.001G024300
Potra000797g06326	58.1766	84.3446	32.0085	0.379497	-1.39784	1.73255e-11	3.37562e-10	Potri.002G153700
Potra003852g23155	79.6943	115.498	43.8909	0.380015	-1.39587	7.41937e-11	1.32656e-09	Potri.014G113600
Potra001073g09270	86.2384	124.976	47.5004	0.380075	-1.39564	2.29386e-09	3.36728e-08	Potri.013G153400
Potra002240g17218	185.285	268.472	102.098	0.380293	-1.39482	2.49138e-22	1.30448e-20	Potri.018G123100
Potra004135g24581	722.171	1046.36	397.982	0.380349	-1.3946	1.68683e-37	2.18134e-35	Potri.001G046500
Potra000105g00356	157.813	228.615	87.0099	0.380595	-1.39367	0.00172507	0.00817175	Potri.005G015300
Potra003967g32472	82.4428	119.429	45.4564	0.380614	-1.3936	3.7138e-11	6.92056e-10	Potri.002G014200
Potra001939g15353	125.803	182.187	69.4189	0.381032	-1.39202	7.81168e-17	2.58866e-15	Potri.005G113600
Potra000924g07477	105.778	153.181	58.3746	0.381082	-1.39183	7.1843e-16	2.19259e-14	Potri.017G145700
Potra000897g07280	50.8982	73.7074	28.0891	0.381089	-1.3918	2.33458e-09	3.42344e-08	Potri.011G112400
Potra000663g05119	113.166	163.843	62.4895	0.381399	-1.39063	7.76434e-16	2.36184e-14	Potri.016G032000
Potra167218g27265	97.3565	140.928	53.7846	0.381645	-1.3897	9.41038e-14	2.32566e-12	Potri.011G037100
Potra001487g12415	24.6729	35.7109	13.6348	0.381811	-1.38907	0.000218059	0.00131029	Potri.006G105400
Potra000357g01403	12.3147	17.818	6.81136	0.382275	-1.38732	0.00207957	0.00962677	Potri.002G130300
Potra002413g18362	15.6901	22.7014	8.6787	0.382297	-1.38723	0.00052695	0.00287609	Potri.019G078000
Potra000519g03473	9.16494	13.2601	5.06973	0.382328	-1.38712	0.00419495	0.0177658	Potri.014G148500
Potra000687g05336	101.698	147.121	56.2751	0.38251	-1.38643	6.33848e-15	1.77293e-13	Potri.006G097300
Potra002911g20289	565.486	818	312.973	0.382607	-1.38606	4.30487e-35	4.88524e-33	Potri.014G197500
Potra000178g00688	21.9843	31.7981	12.1705	0.382744	-1.38555	0.000318312	0.0018323	Potri.001G042500
Potra002470g18697	12.3941	17.9244	6.86389	0.382936	-1.38483	0.00171199	0.00811541	Potri.002G190300
Potra000549g03941	34.3256	49.6413	19.0099	0.382945	-1.38479	2.12013e-06	1.9276e-05	Potri.001G102300
Potra002748g19897	188.397	272.185	104.609	0.384329	-1.37958	5.26416e-22	2.68549e-20	Potri.018G149100
Potra001057g09053	1644.81	2375.89	913.716	0.384578	-1.37865	2.81215e-44	5.24739e-42	Potri.005G205700
Potra000707g05524	27.157	39.2171	15.0969	0.384956	-1.37724	4.50538e-06	3.84508e-05	Potri.016G134000
Potra008020g26080	313.971	453.357	174.585	0.385094	-1.37672	1.11313e-30	9.52257e-29	Potri.006G094300
Potra003837g23059	149.923	216.428	83.4177	0.38543	-1.37546	1.04085e-10	1.82926e-09	Potri.003G061700
Potra002438g18488	14.0829	20.3286	7.8372	0.385527	-1.3751	0.00210526	0.00973272	Potri.005G083300
Potra002947g20368	81.8583	118.153	45.564	0.385637	-1.37468	6.60679e-14	1.65949e-12	Potri.006G062000
Potra000354g01350	14.7264	21.2551	8.19766	0.38568	-1.37452	0.00440511	0.0185148	Potri.005G219300
Potra001507g12563	76.8173	110.853	42.782	0.385936	-1.37357	3.07248e-12	6.43255e-11	Potri.018G115100
Potra000404g01940	28.0269	40.4441	15.6098	0.385959	-1.37348	4.64368e-05	0.000325702	Potri.008G005800
Potra000915g07427	53.9605	77.8642	30.0568	0.386015	-1.37327	1.98295e-08	2.53947e-07	Potri.009G100200
Potra000372g01579	65.3422	94.2487	36.4358	0.386592	-1.37112	3.10592e-10	5.10065e-09	Potri.002G051600
Potra002061g16076	139.029	200.481	77.577	0.386955	-1.36976	1.24261e-19	5.21879e-18	Potri.003G073800
Potra000112g00369	8.28408	11.9454	4.62272	0.386986	-1.36965	0.00867515	0.0329052	Potri.001G212400
Potra001734g14130	15.2484	21.9877	8.50901	0.386989	-1.36964	0.000112293	0.000722036	Potri.013G051100
Potra001055g09030	11.1327	16.0526	6.21274	0.387024	-1.3695	0.00857402	0.0325801	Potri.009G109400
Potra189742g28715	14.5662	20.9984	8.13389	0.387357	-1.36826	0.00168209	0.0079944	Potri.011G033800
Potra001073g09263	25.4053	36.619	14.1916	0.387548	-1.36755	3.1364e-05	0.000228156	Potri.013G152700
Potra001699g13876	130.861	188.535	73.1876	0.388192	-1.36516	5.8921e-11	1.07141e-09	Potri.006G074900
Potra000439g02404	107.674	155.122	60.225	0.388243	-1.36497	2.83242e-14	7.42222e-13	Potri.005G069200
Potra155372g30918	200.49	288.776	112.203	0.388549	-1.36383	2.45095e-23	1.36835e-21	Potri.010G236500
Potra002283g17493	124.322	178.981	69.6627	0.389219	-1.36135	1.89506e-10	3.22252e-09	Potri.010G043800
Potra003197g20977	451.534	649.962	253.105	0.389416	-1.36062	2.55243e-10	4.24687e-09	Potri.015G076600
Potra001319g11318	18580.5	26742.3	10418.8	0.389599	-1.35994	4.1082e-28	3.14656e-26	Potri.001G036900
Potra000902g07321	99.6236	143.384	55.8634	0.389607	-1.35991	3.28503e-09	4.73968e-08	Potri.006G052100
Potra001079g09328	89.3409	128.539	50.1429	0.390099	-1.35809	1.44112e-13	3.47204e-12	Potri.002G175700
Potra003644g22269	21.506	30.9405	12.0714	0.39015	-1.3579	6.41153e-05	0.000436269	Potri.005G014200
Potra000845g06814	750.835	1080.01	421.658	0.39042	-1.3569	6.85911e-39	9.9845e-37	Potri.004G067000
Potra000833g06683	213.087	306.5	119.674	0.390454	-1.35677	1.00535e-22	5.37533e-21	Potri.001G358200
Potra000417g02133	61.8387	88.927	34.7505	0.390776	-1.35559	5.08411e-11	9.3057e-10	Potri.001G296500
Potra000129g00424	59.076	84.9393	33.2126	0.391016	-1.3547	1.4749e-05	0.000114352	Potri.001G054600
Potra003829g23023	31.7743	45.6658	17.8828	0.391602	-1.35254	1.31109e-06	1.23945e-05	Potri.009G058200
Potra001866g14928	37.3284	53.6417	21.015	0.391767	-1.35193	5.08057e-06	4.28956e-05	Potri.001G298700
Potra007864g26048	54.4823	78.2838	30.6809	0.391919	-1.35137	2.37377e-08	3.00948e-07	Potri.012G137700
Potra002574g19365	95.0051	136.49	53.5201	0.392117	-1.35064	1.54647e-14	4.14224e-13	Potri.002G178700
Potra001563g12928	21.3965	30.7275	12.0654	0.392659	-1.34865	0.000920776	0.00471027	Potri.016G072600
Potra001123g09906	140.116	201.213	79.0197	0.392717	-1.34844	3.9909e-15	1.13223e-13	Potri.017G109000
Potra175505g35164	324.645	466.173	183.118	0.392811	-1.34809	2.32468e-29	1.87887e-27	Potri.009G135200
Potra002839g20100	97.0758	139.363	54.7883	0.393133	-1.34691	1.13116e-13	2.76117e-12	Potri.006G103900
Potra000174g00653	776.355	1113.72	438.993	0.394169	-1.34311	9.40229e-22	4.6848e-20	Potri.006G115400
Potra182478g28226	609.72	874.634	344.807	0.39423	-1.34289	1.80141e-30	1.52697e-28	Potri.016G111000
Potra000700g05448	69.6873	99.9647	39.41	0.394239	-1.34286	2.39478e-10	3.99174e-09	Potri.018G080900
Potra001832g14747	64.0723	91.9073	36.2373	0.394281	-1.3427	2.37845e-09	3.48593e-08	Potri.004G137200
Potra000140g00485	55.2691	79.2794	31.2588	0.394287	-1.34268	1.16725e-08	1.5595e-07	Potri.004G183500
Potra000538g03773	129.837	186.169	73.5047	0.394829	-1.3407	3.10001e-10	5.09395e-09	Potri.001G229100
Potra000488g32753	189.299	271.402	107.197	0.394973	-1.34017	7.12329e-11	1.27691e-09	Potri.007G077500
Potra001036g08738	326.566	468.195	184.936	0.394998	-1.34008	1.07048e-25	7.01944e-24	Potri.007G058500
Potra001300g11186	64.2366	92.0513	36.422	0.39567	-1.33763	1.20743e-09	1.83644e-08	Potri.001G093800
Potra001263g10914	762.024	1091.94	432.11	0.395728	-1.33742	1.01021e-34	1.11456e-32	Potri.012G106100
Potra000089g33466	17.2687	24.7424	9.79495	0.395878	-1.33687	0.000299441	0.00173807	Potri.003G015900
Potra000616g04688	25.8247	37.0008	14.6486	0.395899	-1.3368	2.871e-05	0.000210336	Potri.001G170800
Potra001613g13292	234.374	335.487	133.261	0.397216	-1.332	1.50731e-21	7.41728e-20	Potri.008G067500
Potra000847g06831	237.85	340.407	135.292	0.397442	-1.33119	8.16829e-24	4.71168e-22	Potri.004G049300
Potra004019g24283	27.9144	39.9494	15.8794	0.397488	-1.33102	0.00104441	0.00525666	Potri.003G097300
Potra004014g32515	23.9062	34.1897	13.6227	0.398445	-1.32755	0.000162821	0.00101092	Potri.012G057900
Potra001051g08957	42.5314	60.823	24.2398	0.39853	-1.32724	2.04693e-08	2.61659e-07	Potri.014G100200
Potra001270g10977	739.059	1056.89	421.23	0.398556	-1.32714	5.05793e-22	2.59457e-20	Potri.003G114100
Potra000125g00411	25.3077	36.187	14.4285	0.39872	-1.32655	0.000131628	0.000831929	Potri.018G019400
Potra000613g04665	590.507	844.288	336.726	0.398828	-1.32616	6.77455e-14	1.69993e-12	Potri.003G131600
Potra003426g21633	55.4873	79.3105	31.664	0.399241	-1.32467	7.0819e-09	9.8008e-08	Potri.012G138300
Potra000787g33349	10.4584	14.9444	5.97243	0.399644	-1.32321	0.00923328	0.0346769	Potri.015G115500
Potra001332g11453	81.0756	115.848	46.303	0.399687	-1.32306	1.459e-11	2.85064e-10	Potri.002G188600
Potra004323g24815	195.915	279.936	111.893	0.399711	-1.32297	7.84363e-21	3.68996e-19	Potri.001G086600
Potra173032g27623	261.373	373.464	149.282	0.399723	-1.32293	1.82024e-14	4.84289e-13	Potri.003G031000
Potra000396g01850	70.7493	101.085	40.4133	0.399794	-1.32267	5.20682e-10	8.31507e-09	Potri.001G403900
Potra001020g08515	178.884	255.581	102.187	0.399822	-1.32257	2.27601e-18	8.76454e-17	Potri.009G078200
Potra002037g15928	143.03	204.35	81.7104	0.399855	-1.32245	1.75922e-17	6.1757e-16	Potri.014G130300
Potra000566g04168	26.5089	37.8709	15.1468	0.399959	-1.32207	5.97196e-05	0.000409063	Potri.014G132400
Potra001064g35677	19.4127	27.7224	11.1029	0.400505	-1.32011	0.00999944	0.0371826	Potri.015G000500
Potra002180g16810	112.817	161.107	64.5274	0.400525	-1.32003	1.36616e-14	3.67343e-13	Potri.006G041200
Potra001661g13636	733.82	1047.47	420.173	0.401132	-1.31785	3.42745e-34	3.63715e-32	Potri.006G222200
Potra001247g10709	13.712	19.5708	7.85315	0.401268	-1.31736	0.00483622	0.0200449	Potri.005G134500
Potra166218g34376	9.77312	13.9489	5.59731	0.401272	-1.31735	0.0124456	0.0447987	Potri.T028700
Potra001346g11555	44.8289	63.9783	25.6795	0.401378	-1.31697	0.000653803	0.00348032	Potri.004G140200
Potra003883g23320	112.98	161.126	64.8349	0.402386	-1.31335	6.59576e-13	1.48728e-11	Potri.009G061300
Potra003847g23128	257.847	367.667	148.027	0.402613	-1.31253	9.18115e-11	1.62485e-09	Potri.006G099600
Potra001359g11631	996.269	1420.59	571.952	0.402617	-1.31252	3.12859e-16	9.88456e-15	Potri.018G090300
Potra001520g30884	207.052	295.217	118.887	0.40271	-1.31219	1.41993e-19	5.91879e-18	Potri.005G123500
Potra000531g32953	574.49	819.006	329.973	0.402895	-1.31152	9.53353e-16	2.87173e-14	Potri.008G198000
Potra000950g07775	956.786	1363.79	549.779	0.403126	-1.3107	2.95429e-05	0.000216039	Potri.019G128600
Potra000958g07870	146.791	209.17	84.4111	0.403553	-1.30917	2.00624e-09	2.95443e-08	Potri.002G140500
Potra001501g12519	68.4145	97.4791	39.35	0.403677	-1.30873	3.09118e-10	5.08244e-09	Potri.004G041800
Potra196424g29104	37.7081	53.7168	21.6994	0.403959	-1.30772	9.77545e-07	9.43377e-06	Potri.008G187100
Potra199865g29449	66.6772	94.9815	38.3729	0.404004	-1.30756	3.11385e-10	5.10763e-09	Potri.011G028400
Potra001890g15046	448.393	638.623	258.163	0.404249	-1.30668	8.78085e-16	2.64787e-14	Potri.001G462800
Potra004137g24608	40.0656	57.0603	23.071	0.404327	-1.30641	4.4652e-05	0.000314293	Potri.008G161800
Potra002388g18184	125.836	179.182	72.4896	0.404559	-1.30558	9.0044e-14	2.23526e-12	Potri.008G116500
Potra000591g04467	17.6502	25.1304	10.1701	0.404692	-1.3051	0.000181701	0.00111667	Potri.002G144900
Potra001624g13363	46.1823	65.7497	26.6149	0.404792	-1.30475	8.58446e-05	0.000568136	Potri.006G207900
Potra000997g08293	532.921	758.493	307.349	0.40521	-1.30326	2.57157e-31	2.29895e-29	Potri.010G208300
Potra002124g16474	75.3383	107.215	43.462	0.405374	-1.30268	1.65955e-05	0.000127495	Potri.003G037600
Potra001588g13141	31.2045	44.3883	18.0206	0.405977	-1.30053	7.568e-06	6.21788e-05	Potri.006G169700
Potra001762g14340	9.45926	13.4543	5.46421	0.406131	-1.29998	0.00299744	0.0132703	Potri.019G081500
Potra001249g10745	556.745	791.681	321.809	0.406488	-1.29872	3.25667e-33	3.23376e-31	Potri.002G251600
Potra000849g06857	616.598	876.432	356.764	0.407064	-1.29667	7.42888e-33	7.09777e-31	Potri.010G092300
Potra000952g07814	26.9182	38.2464	15.59	0.407619	-1.29471	0.00145016	0.00702538	Potri.004G117100
Potra000450g02540	48.9647	69.569	28.3604	0.407658	-1.29457	4.23299e-08	5.19372e-07	Potri.012G072400
Potra003793g22877	27.8626	39.5865	16.1386	0.40768	-1.29449	3.63279e-05	0.000260585	Potri.002G142600
Potra199836g29445	14.7669	20.9796	8.55427	0.407742	-1.29427	0.00281681	0.0125788	Potri.010G025500
Potra003945g23692	131.863	187.302	76.4236	0.408023	-1.29328	2.36402e-08	2.99849e-07	Potri.004G190100
Potra003896g23394	33.9527	48.2263	19.6791	0.408058	-1.29315	2.54344e-05	0.000187873	Potri.005G149700
Potra003329g32151	24.4598	34.7155	14.2041	0.409158	-1.28927	0.000144765	0.000905488	Potri.016G038300
Potra004010g24185	249.437	354.012	144.861	0.409196	-1.28913	7.38161e-23	3.97734e-21	Potri.010G216200
Potra001247g10716	338.326	480.114	196.538	0.409357	-1.28857	1.89717e-12	4.06583e-11	Potri.008G097200
Potra001049g08925	898.751	1275.2	522.3	0.409582	-1.28777	1.79715e-36	2.23063e-34	Potri.003G164200
Potra002299g17560	14.3389	20.3412	8.33675	0.409846	-1.28684	0.00198337	0.00923677	Potri.013G065900
Potra001355g11614	36.6747	52.0139	21.3355	0.410188	-1.28564	0.000143393	0.00089832	Potri.013G037300
Potra001343g11533	15.9386	22.6011	9.27604	0.410424	-1.28481	0.00154658	0.00742011	Potri.011G071000
Potra000404g01934	127.366	180.597	74.1356	0.410504	-1.28453	1.97653e-14	5.24366e-13	Potri.008G006300
Potra001089g09474	22.2554	31.554	12.9569	0.410626	-1.2841	0.00275126	0.0123312	Potri.003G105200
Potra196759g29160	28.1734	39.9372	16.4096	0.410884	-1.2832	7.97733e-05	0.000531879	Potri.004G231600
Potra001446g12174	23.9415	33.9331	13.95	0.411103	-1.28243	7.87472e-05	0.000525762	Potri.001G060000
Potra000656g05055	134.538	190.676	78.3994	0.411166	-1.28221	2.27375e-16	7.24967e-15	Potri.012G017100
Potra001572g13021	54.4189	77.0945	31.7433	0.411745	-1.28018	1.40808e-07	1.56596e-06	Potri.T168100
Potra000457g02638	149.862	212.195	87.5292	0.412495	-1.27755	4.21204e-16	1.31433e-14	Potri.004G029100
Potra001355g30770	210.225	297.658	122.791	0.412523	-1.27745	3.83209e-08	4.72477e-07	Potri.010G231600
Potra002482g18767	176.83	250.285	103.375	0.41303	-1.27568	1.10886e-19	4.68534e-18	Potri.014G115600
Potra002054g16021	4370.32	6184.77	2555.87	0.413252	-1.27491	1.44384e-41	2.36136e-39	Potri.016G113600
Potra001086g09422	60.9785	86.2849	35.6722	0.413423	-1.27431	6.90042e-07	6.83966e-06	Potri.001G135500
Potra001809g14629	249.566	353.129	146.003	0.413456	-1.27419	2.76985e-22	1.44214e-20	#N/A
Potra002559g19285	25.0313	35.4167	14.646	0.413534	-1.27392	0.00206399	0.00956579	Potri.007G134400
Potra001917g31457	13.0108	18.4065	7.61498	0.413711	-1.27331	0.00880332	0.0333141	Potri.002G004200
Potra000830g06650	12.8038	18.1124	7.49526	0.413819	-1.27293	0.00635164	0.0253364	Potri.010G244400
Potra002450g18561	65.2914	92.3081	38.2746	0.41464	-1.27007	4.22239e-09	6.04817e-08	Potri.010G086700
Potra003375g21485	854.269	1207.74	500.795	0.414653	-1.27002	3.19644e-13	7.40589e-12	Potri.008G158800
Potra000640g33102	100.124	141.536	58.7113	0.414815	-1.26946	1.93721e-12	4.1431e-11	Potri.004G098300
Potra174083g27696	13.5933	19.2078	7.97886	0.415396	-1.26744	0.00334639	0.0145944	Potri.005G043500
Potra000002g00003	293.66	414.897	172.423	0.41558	-1.2668	1.60365e-09	2.39197e-08	Potri.004G023000
Potra185075g28355	295.742	417.815	173.67	0.415663	-1.26652	2.22635e-10	3.73561e-09	Potri.005G072800
Potra000335g01162	258.551	365.256	151.847	0.415727	-1.26629	1.07795e-20	4.97846e-19	Potri.008G148400
Potra001534g12733	34.3105	48.4704	20.1506	0.415731	-1.26628	0.000953968	0.00485683	Potri.003G184100
Potra003749g22680	90.5264	127.837	53.2156	0.416277	-1.26439	2.36366e-10	3.94696e-09	Potri.008G092700
Potra000594g04503	562.015	793.588	330.442	0.41639	-1.26399	1.58818e-12	3.43895e-11	Potri.006G275000
Potra002154g16660	82.9998	117.182	48.8177	0.416598	-1.26327	9.46684e-12	1.88274e-10	Potri.T011400
Potra004466g24952	139.758	197.3	82.2168	0.41671	-1.26288	2.5219e-15	7.33436e-14	Potri.005G123800
Potra000482g02967	20.2381	28.5612	11.9151	0.417179	-1.26126	0.00375077	0.0161229	Potri.006G184900
Potra003940g23655	15.7235	22.1881	9.25881	0.417288	-1.26089	0.00148923	0.00718838	Potri.001G439100
Potra001205g10409	53.3386	75.2475	31.4298	0.417686	-1.25951	2.44219e-06	2.19458e-05	Potri.011G151200
Potra001452g12208	696.805	982.924	410.687	0.417821	-1.25904	3.56961e-20	1.57533e-18	Potri.009G070400
Potra004251g24733	936.316	1320.65	551.985	0.417965	-1.25855	1.65574e-33	1.67398e-31	Potri.002G187500
Potra003895g23389	231.851	326.991	136.712	0.41809	-1.25811	3.13618e-20	1.39512e-18	Potri.001G319100
Potra000966g07939	47.8408	67.4654	28.2162	0.418232	-1.25762	2.28387e-06	2.06499e-05	Potri.008G058700
Potra001558g12897	22.047	31.0906	13.0034	0.418244	-1.25758	0.000470799	0.00260386	Potri.005G169300
Potra177474g27957	13.3404	18.8071	7.87379	0.418661	-1.25615	0.00422491	0.0178782	#N/A
Potra001226g10555	1290.02	1818	762.045	0.419167	-1.2544	1.40496e-34	1.53184e-32	Potri.012G106100
Potra002306g17586	188.341	265.404	111.277	0.419274	-1.25403	2.80866e-18	1.07265e-16	Potri.005G250800
Potra002229g17130	34.3464	48.3953	20.2975	0.419412	-1.25356	1.64725e-06	1.52866e-05	Potri.015G108600
Potra000930g33525	169.667	239.047	100.287	0.419531	-1.25315	1.52556e-18	5.92566e-17	Potri.001G037400
Potra000515g03407	121.66	171.349	71.9701	0.42002	-1.25147	3.87161e-14	9.99464e-13	Potri.011G053700
Potra001701g13887	29.3826	41.3771	17.388	0.420232	-1.25074	4.53041e-05	0.000318239	Potri.016G114800
Potra003375g21486	491.503	692.123	290.882	0.420275	-1.25059	7.91625e-22	4.00174e-20	Potri.008G158800
Potra002175g16776	254.987	359.046	150.928	0.420358	-1.25031	8.6853e-21	4.04485e-19	Potri.014G000800
Potra002321g17701	802.18	1129.45	474.91	0.42048	-1.24989	8.09951e-09	1.1126e-07	Potri.004G015300
Potra000427g02250	1854.26	2610.63	1097.88	0.420543	-1.24968	9.39748e-39	1.33989e-36	Potri.006G167200
Potra001111g09750	216.169	304.341	127.998	0.420573	-1.24957	1.31212e-20	6.00013e-19	Potri.019G092300
Potra002106g16374	17.0358	23.9786	10.093	0.420918	-1.24839	0.00205884	0.00954668	Potri.001G267300
Potra167299g27267	17.6466	24.8363	10.4569	0.421033	-1.24799	0.00172673	0.00817718	Potri.017G074200
Potra001972g15546	30.6616	43.1488	18.1744	0.421202	-1.24741	0.000124616	0.000792294	Potri.001G265300
Potra003983g23982	984.202	1384.74	583.665	0.421498	-1.2464	5.31428e-35	5.95778e-33	Potri.014G162900
Potra000592g04487	807.802	1136.49	479.109	0.421568	-1.24616	1.39503e-19	5.82374e-18	Potri.015G098400
Potra001682g13769	117.27	164.97	69.5709	0.421719	-1.24564	4.17044e-13	9.58272e-12	Potri.009G042100
Potra002322g17754	70.0574	98.5494	41.5653	0.421771	-1.24547	1.89328e-07	2.07485e-06	Potri.016G006500
Potra002322g17758	866.279	1218.23	514.332	0.422198	-1.24401	6.68004e-19	2.65322e-17	Potri.016G006900
Potra003658g22342	28.7211	40.3878	17.0543	0.422263	-1.24378	0.000777785	0.0040511	Potri.009G162600
Potra001181g10230	72.6395	102.124	43.1545	0.422567	-1.24275	3.91707e-10	6.36507e-09	Potri.002G055600
Potra001117g09849	95.2033	133.841	56.5653	0.42263	-1.24253	8.57849e-11	1.52304e-09	Potri.006G234300
Potra002547g19190	14.8244	20.8357	8.81308	0.422981	-1.24134	0.00471695	0.0196443	Potri.010G158400
Potra004182g24668	228.186	320.673	135.699	0.42317	-1.24069	3.58304e-16	1.12692e-14	Potri.009G143700
Potra002744g19890	76.0141	106.814	45.2144	0.423301	-1.24024	9.006e-06	7.28712e-05	Potri.006G057600
Potra003131g20816	37.1076	52.1394	22.0758	0.423399	-1.23991	1.31942e-06	1.24647e-05	Potri.015G007800
Potra000656g33135	18.4917	25.9756	11.0077	0.423771	-1.23864	0.0010542	0.00530018	Potri.012G016400
Potra000551g03967	16.7941	23.5903	9.99781	0.423809	-1.23851	0.00138859	0.00677078	Potri.014G093400
Potra003884g23330	186.451	261.861	111.042	0.42405	-1.23769	3.56958e-18	1.34115e-16	Potri.016G119400
Potra000500g03228	44.4413	62.4128	26.4698	0.424109	-1.23749	2.28026e-05	0.00017015	Potri.016G093100
Potra001908g15136	45.4998	63.8906	27.1089	0.424302	-1.23684	7.00546e-06	5.78648e-05	Potri.006G038700
Potra001133g09948	74.0225	103.94	44.1046	0.424325	-1.23676	3.11075e-10	5.10557e-09	Potri.017G053900
Potra002322g31787	46.2116	64.8859	27.5374	0.424398	-1.23651	8.22334e-07	8.03915e-06	Potri.016G006100
Potra189633g28706	45.9051	64.4477	27.3626	0.424571	-1.23592	1.16379e-06	1.10811e-05	Potri.010G003800
Potra003926g23553	446.427	626.673	266.181	0.424753	-1.2353	1.80656e-20	8.16714e-19	Potri.008G183400
Potra002509g18939	25.1845	35.348	15.0211	0.42495	-1.23464	0.000436734	0.00243483	Potri.009G031500
Potra002617g19586	26.0242	36.5252	15.5232	0.425001	-1.23446	2.7643e-05	0.000202893	#N/A
Potra001206g10442	90.5156	127.036	53.9947	0.425033	-1.23435	3.79404e-11	7.06061e-10	Potri.002G090700
Potra001218g10530	134.197	188.316	80.0794	0.42524	-1.23365	3.663e-06	3.18755e-05	Potri.003G125700
Potra157685g26806	101.06	141.78	60.3392	0.425583	-1.23249	6.04909e-12	1.23211e-10	Potri.008G068200
Potra000009g00052	36.9807	51.8763	22.0852	0.425728	-1.232	3.01016e-06	2.65434e-05	Potri.005G052400
Potra000757g05970	113.215	158.81	67.6213	0.425801	-1.23175	3.16893e-13	7.3544e-12	#N/A
Potra008127g26100	22.4258	31.4536	13.3979	0.425958	-1.23122	0.00276197	0.0123717	Potri.006G271600
Potra000679g05267	15.6397	21.9314	9.34793	0.426236	-1.23028	0.00182161	0.00856812	Potri.013G104700
Potra000727g05697	13.8525	19.4208	8.28422	0.426564	-1.22916	0.00476937	0.0198122	Potri.008G106600
Potra001524g12678	61.9221	86.8048	37.0395	0.426699	-1.22871	5.5639e-10	8.83961e-09	Potri.003G091400
Potra000492g35194	13.1043	18.3689	7.83977	0.426796	-1.22838	0.00477367	0.0198241	Potri.016G139900
Potra000832g06668	51.5292	72.23	30.8285	0.42681	-1.22833	1.83728e-07	2.01825e-06	Potri.007G063300
Potra002861g20172	273.812	383.745	163.88	0.427054	-1.22751	2.69885e-21	1.30725e-19	Potri.009G150500
Potra002525g19057	195.133	273.475	116.791	0.427062	-1.22748	1.37465e-19	5.74728e-18	Potri.003G144400
Potra000793g06288	420.168	588.709	251.627	0.427423	-1.22626	2.48582e-22	1.30402e-20	Potri.006G076000
Potra002371g18064	66.6875	93.4347	39.9404	0.427469	-1.22611	6.11222e-09	8.5568e-08	Potri.005G102700
Potra005649g25458	1142.82	1600.62	685.018	0.427971	-1.22442	1.82206e-17	6.38019e-16	Potri.004G075800
Potra000983g08125	151.416	212.057	90.7745	0.428066	-1.22409	7.82679e-16	2.37823e-14	Potri.009G030000
Potra001016g08473	315.769	442.175	189.364	0.428254	-1.22346	6.24344e-22	3.17924e-20	Potri.002G073400
Potra001324g11375	25.1735	35.2479	15.099	0.428366	-1.22309	0.000607303	0.00325962	Potri.003G222200
Potra001653g13557	143.643	201.126	86.161	0.428394	-1.22299	4.21803e-14	1.08286e-12	Potri.005G053500
Potra002605g19549	458.662	642.162	275.162	0.428493	-1.22266	4.97746e-27	3.55754e-25	Potri.018G035400
Potra000870g07016	16.7434	23.4402	10.0465	0.4286	-1.2223	0.00363595	0.0156827	Potri.011G093400
Potra002516g18987	20.7261	29.0057	12.4465	0.429106	-1.22059	0.00609833	0.0244641	Potri.010G237300
Potra002509g18940	57.4556	80.4065	34.5047	0.429128	-1.22052	9.24498e-08	1.06478e-06	Potri.001G240400
Potra003839g23069	399.404	558.751	240.056	0.429631	-1.21883	4.85466e-12	9.99808e-11	Potri.006G255200
Potra003343g21403	78.7999	110.232	47.3676	0.429708	-1.21857	3.04302e-10	5.00919e-09	Potri.001G414700
Potra001176g10185	242.884	339.637	146.13	0.430254	-1.21674	1.30328e-19	5.46532e-18	Potri.018G143600
Potra001569g12978	87.1262	121.821	52.4315	0.430398	-1.21626	4.42232e-10	7.13189e-09	Potri.003G129900
Potra002125g31651	41.7299	58.3246	25.1352	0.430954	-1.21439	0.000436064	0.00243305	Potri.011G151600
Potra000411g02018	76.9126	107.49	46.3349	0.431061	-1.21404	3.96395e-09	5.69264e-08	Potri.002G260000
Potra161801g26968	33.5001	46.8178	20.1825	0.431087	-1.21395	4.18551e-06	3.60166e-05	Potri.015G065100
Potra003955g23747	75.2521	105.13	45.3746	0.431606	-1.21221	8.32984e-09	1.13918e-07	Potri.011G128900
Potra001866g14930	34.3176	47.9384	20.6967	0.431736	-1.21178	1.42808e-06	1.34183e-05	Potri.001G298900
Potra003721g35625	16.6203	23.2147	10.0258	0.431875	-1.21131	0.00647667	0.0257318	Potri.005G257700
Potra000008g00038	75.4641	105.38	45.5478	0.432223	-1.21015	1.67452e-08	2.17452e-07	Potri.001G159400
Potra001205g10419	42.6913	59.5954	25.7872	0.432705	-1.20854	0.000461528	0.00255666	Potri.011G150200
Potra000831g06666	44.1078	61.5678	26.6477	0.432818	-1.20817	7.67245e-05	0.000513152	Potri.019G074400
Potra002082g16221	16.3801	22.864	9.89617	0.432827	-1.20814	0.00490955	0.0203155	Potri.010G220600
Potra194917g28997	37.2651	52.0138	22.5164	0.432893	-1.20792	1.78064e-05	0.000135599	Potri.019G100000
Potra002477g18741	1905.46	2659.37	1151.55	0.433018	-1.2075	2.91283e-27	2.10352e-25	Potri.001G403700
Potra001751g14273	25.8815	36.1058	15.6572	0.433647	-1.20541	0.00122602	0.00605991	Potri.004G034300
Potra194532g28964	44.7207	62.3755	27.0659	0.433919	-1.2045	6.84659e-06	5.66565e-05	Potri.002G247700
Potra003098g20733	23.8354	33.2445	14.4263	0.433947	-1.20441	0.000171749	0.0010609	Potri.001G235700
Potra002209g17011	138.47	193.099	83.8414	0.434188	-1.20361	1.91939e-13	4.55289e-12	Potri.017G113200
Potra000565g04136	1030.15	1436.15	624.155	0.434604	-1.20223	3.21516e-26	2.17497e-24	Potri.002G184900
Potra004555g25063	53.9266	75.147	32.7062	0.43523	-1.20015	4.33957e-08	5.31277e-07	Potri.019G103000
Potra001057g09067	62.5833	87.2055	37.9612	0.435307	-1.1999	4.97566e-08	6.02256e-07	Potri.005G207100
Potra000007g00035	364.732	508.22	221.244	0.435332	-1.19981	6.57983e-24	3.85135e-22	Potri.004G089800
Potra000586g04378	11.0936	15.4577	6.72951	0.43535	-1.19975	0.00580516	0.0234492	Potri.006G027200
Potra008527g26177	22.7003	31.6229	13.7777	0.435689	-1.19863	0.000319644	0.00183807	Potri.016G130700
Potra003290g21251	330.121	459.843	200.4	0.435801	-1.19826	1.27783e-14	3.44928e-13	Potri.001G368000
Potra002322g17756	1401.85	1952.43	851.278	0.43601	-1.19757	5.75257e-35	6.42324e-33	Potri.016G006700
Potra002350g17936	23.0673	32.1175	14.0172	0.436435	-1.19616	0.000922406	0.00471774	Potri.001G052500
Potra000711g05567	248.409	345.824	150.994	0.436623	-1.19554	1.72842e-19	7.10878e-18	Potri.004G039100
Potra000059g00229	20.472	28.4987	12.4453	0.436696	-1.1953	0.000907348	0.00465185	Potri.005G068400
Potra001624g13359	14.5777	20.291	8.86433	0.43686	-1.19476	0.00735682	0.0286513	Potri.016G075000
Potra168419g27366	261.731	364.298	159.163	0.436904	-1.19461	9.12585e-20	3.88554e-18	Potri.006G252100
Potra001443g12140	33.4116	46.492	20.3312	0.437304	-1.19329	0.000104077	0.000674357	Potri.014G120100
Potra001546g12814	187.418	260.785	114.051	0.437338	-1.19318	5.26731e-17	1.77943e-15	Potri.008G145900
Potra000623g33073	46.2141	64.2914	28.1369	0.437646	-1.19216	0.000476882	0.00263331	Potri.012G052500
Potra008145g34585	74.7672	104.009	45.5249	0.4377	-1.19199	8.12862e-09	1.11472e-07	#N/A
Potra189189g28664	8009.88	11141	4878.8	0.437915	-1.19128	5.23174e-39	7.65568e-37	Potri.015G034700
Potra000770g06077	24.7811	34.4654	15.0969	0.438029	-1.1909	0.0030283	0.0133842	Potri.006G173700
Potra001507g12573	23.1351	32.1738	14.0965	0.438136	-1.19055	0.00197843	0.00921996	Potri.018G114100
Potra000586g04383	74.336	103.371	45.3014	0.438242	-1.1902	4.24537e-09	6.07484e-08	Potri.006G027700
Potra001169g10132	19.0998	26.558	11.6416	0.438348	-1.18985	0.0011328	0.00565037	Potri.019G002500
Potra000717g05621	35.9882	50.0355	21.941	0.438508	-1.18933	0.000300608	0.00174412	Potri.006G164600
Potra002667g19708	90.0104	125.139	54.8819	0.438568	-1.18913	1.168e-10	2.04238e-09	Potri.018G098100
Potra000997g08300	43.1156	59.9397	26.2915	0.438632	-1.18892	2.91328e-06	2.57627e-05	Potri.006G053500
Potra004030g24346	515.219	715.982	314.456	0.439196	-1.18706	5.1191e-25	3.20555e-23	Potri.001G118300
Potra001493g12466	30.865	42.892	18.8381	0.439198	-1.18706	0.00393684	0.016829	Potri.010G127600
Potra001827g14723	49.7443	69.1119	30.3768	0.43953	-1.18597	6.25269e-07	6.25561e-06	Potri.010G192500
Potra001821g14695	65.2872	90.7053	39.8691	0.439545	-1.18592	5.1063e-08	6.16995e-07	Potri.008G020800
Potra003356g21437	15.7526	21.8812	9.62397	0.439828	-1.18499	0.00217297	0.0100058	Potri.001G406700
Potra001437g12099	42.7382	59.3644	26.112	0.439859	-1.18489	6.59854e-05	0.000447789	Potri.011G151200
Potra002545g19175	23.0494	32.011	14.0878	0.440093	-1.18412	0.000671232	0.00356354	Potri.003G133300
Potra002082g16225	111.621	154.984	68.2591	0.440427	-1.18303	3.59519e-11	6.71754e-10	Potri.010G221000
Potra001663g13664	793.834	1102.01	485.656	0.440699	-1.18213	3.49705e-31	3.09081e-29	Potri.006G194900
Potra000771g06081	22.0417	30.5963	13.487	0.440807	-1.18178	0.00131207	0.00644287	Potri.011G044100
Potra001614g13299	406.173	563.62	248.726	0.441301	-1.18017	3.23297e-19	1.31412e-17	Potri.004G203400
Potra003613g22172	206.732	286.835	126.629	0.44147	-1.17961	1.02748e-15	3.09168e-14	Potri.006G219500
Potra000557g04035	214.211	297.202	131.22	0.441518	-1.17945	2.70308e-14	7.10339e-13	Potri.003G157100
Potra001347g11567	7414.88	10285.1	4544.7	0.441873	-1.1783	1.58508e-23	8.95734e-22	Potri.010G193100
Potra175858g27835	515.279	714.617	315.941	0.442112	-1.17752	1.99483e-21	9.7302e-20	Potri.005G093200
Potra167990g31100	12.1396	16.8351	7.44401	0.442171	-1.17732	0.0124518	0.0448152	Potri.016G059500
Potra000464g02747	19.932	27.641	12.223	0.442206	-1.17721	0.0002301	0.00137285	Potri.010G199100
Potra001855g14860	186.421	258.48	114.362	0.442441	-1.17644	1.49391e-15	4.43279e-14	Potri.003G166300
Potra000844g06804	269.821	374.109	165.532	0.442472	-1.17634	1.15683e-15	3.46587e-14	Potri.009G164300
Potra002306g17595	1348.28	1869.24	827.315	0.442594	-1.17594	5.69254e-33	5.51462e-31	Potri.005G251800
Potra001109g09722	14.5095	20.1156	8.90349	0.442616	-1.17587	0.0025808	0.011662	Potri.006G127400
Potra000444g02476	1232.07	1707.93	756.209	0.442764	-1.17539	6.43611e-19	2.55999e-17	Potri.012G080000
Potra003433g21653	28.9694	40.1563	17.7825	0.442832	-1.17517	0.000149772	0.000935337	Potri.004G092200
Potra000559g04053	11.4845	15.9148	7.05423	0.443251	-1.1738	0.0136795	0.0483171	Potri.001G466100
Potra001797g31274	219.823	304.558	135.087	0.443549	-1.17283	2.14138e-18	8.26899e-17	Potri.014G153900
Potra001323g11351	1224.91	1696.85	752.959	0.443738	-1.17222	3.12154e-32	2.87378e-30	Potri.005G243000
Potra000663g05121	149.428	206.998	91.8581	0.443764	-1.17214	5.80786e-14	1.46663e-12	Potri.016G031700
Potra000942g07709	93.1089	128.958	57.2595	0.444016	-1.17132	1.96018e-11	3.77678e-10	Potri.004G156200
Potra003577g34804	180.216	249.59	110.843	0.444101	-1.17104	1.91071e-13	4.53658e-12	#N/A
Potra000447g32656	29.0695	40.2563	17.8828	0.444225	-1.17064	0.000100056	0.000650426	Potri.016G071700
Potra000914g07410	89.6281	124.093	55.1628	0.444526	-1.16966	0.000702174	0.00370587	Potri.006G060200
Potra001789g14526	2042.86	2827.94	1257.77	0.444766	-1.16888	6.34537e-33	6.12571e-31	Potri.018G108500
Potra183234g28283	13.732	19.0075	8.45647	0.444901	-1.16844	0.0132368	0.0470736	Potri.T180400
Potra001089g09471	47.3327	65.5121	29.1533	0.445007	-1.1681	4.18095e-06	3.59886e-05	Potri.003G105500
Potra002152g16650	462.683	640.315	285.05	0.445172	-1.16757	1.68273e-23	9.48987e-22	Potri.010G080600
Potra000464g02709	265.475	367.341	163.609	0.445387	-1.16687	5.66826e-10	8.99512e-09	Potri.008G064200
Potra003241g21111	54.0163	74.6968	33.3359	0.446283	-1.16397	1.56293e-06	1.45722e-05	Potri.002G167100
Potra000973g08054	272.021	376.131	167.912	0.446418	-1.16353	1.03876e-15	3.12222e-14	Potri.012G144200
Potra001536g12748	197.022	272.329	121.715	0.44694	-1.16185	4.20765e-16	1.31433e-14	Potri.006G081400
Potra000598g04538	444.683	614.602	274.764	0.44706	-1.16146	2.22436e-23	1.24685e-21	Potri.009G054900
Potra002283g17492	23.2406	32.1174	14.3639	0.44723	-1.16091	0.00073716	0.00386338	Potri.010G043900
Potra000479g02933	59.8397	82.6915	36.9878	0.447299	-1.16069	7.89071e-08	9.21014e-07	Potri.015G134700
Potra182477g34654	108.278	149.6	66.9555	0.447565	-1.15983	4.39906e-09	6.28181e-08	Potri.016G111000
Potra001110g09736	597.211	824.749	369.673	0.448225	-1.15771	3.12933e-25	1.98188e-23	Potri.002G238200
Potra000697g05426	13.7097	18.9323	8.48708	0.448287	-1.15751	0.0114577	0.0416852	Potri.011G049600
Potra001651g13547	59.8544	82.6477	37.061	0.448422	-1.15707	4.49354e-08	5.48847e-07	Potri.004G064000
Potra003346g21409	28.1816	38.9041	17.459	0.448771	-1.15595	4.20376e-05	0.00029808	Potri.007G016700
Potra002328g17807	1344.27	1855.67	832.879	0.448829	-1.15576	1.06853e-24	6.57265e-23	#N/A
Potra003067g20665	108.352	149.543	67.1613	0.44911	-1.15486	6.9026e-11	1.24216e-09	Potri.014G150200
Potra002562g19298	16.7075	23.0581	10.357	0.449169	-1.15467	0.00272	0.0122152	Potri.002G118900
Potra001030g30418	52.4355	72.3422	32.5288	0.449652	-1.15312	1.00289e-06	9.66492e-06	Potri.002G173700
Potra002384g18158	40.9263	56.4591	25.3936	0.44977	-1.15274	2.60626e-05	0.000192104	Potri.018G103300
Potra001249g10744	26.0577	35.9428	16.1727	0.449956	-1.15214	0.000518874	0.00283758	Potri.002G251400
Potra002053g16020	181.67	250.559	112.781	0.450115	-1.15163	0.00171223	0.00811541	Potri.019G126400
Potra004014g32516	21.4998	29.6444	13.3552	0.450515	-1.15035	0.00191324	0.00895367	Potri.012G057800
Potra003720g22559	21.7687	30.0139	13.5236	0.45058	-1.15015	0.000939105	0.00479257	Potri.004G172900
Potra002861g20171	22.4273	30.9217	13.9328	0.450582	-1.15014	0.000648192	0.00345611	Potri.010G039000
Potra001039g08779	44.128	60.8417	27.4143	0.450583	-1.15013	2.6149e-06	2.33844e-05	Potri.004G073400
Potra001414g12000	32.3603	44.6138	20.1068	0.450685	-1.14981	9.345e-05	0.00061307	Potri.001G070400
Potra003566g22037	66.7461	92.0073	41.4849	0.450886	-1.14916	6.21836e-08	7.38212e-07	Potri.007G143800
Potra002497g18861	292.813	403.609	182.017	0.450974	-1.14888	3.15754e-18	1.19518e-16	Potri.006G226700
Potra003875g23280	24.4412	33.689	15.1934	0.450989	-1.14883	0.00103131	0.00519921	Potri.012G088900
Potra181369g28150	44.3741	61.1608	27.5874	0.451063	-1.1486	0.000290026	0.00168977	Potri.002G031900
Potra169834g27474	814.717	1122.74	506.692	0.451298	-1.14785	0.000166967	0.00103436	Potri.009G030800
Potra001770g14385	48.325	66.5954	30.0546	0.451302	-1.14784	1.15641e-06	1.10263e-05	Potri.003G075000
Potra002517g18997	33.8434	46.6236	21.0633	0.451773	-1.14633	7.65196e-05	0.000511904	Potri.015G109600
Potra002152g16644	433.5	597.129	269.872	0.451949	-1.14577	5.28031e-17	1.78166e-15	Potri.010G081300
Potra000979g08095	23.8599	32.8623	14.8574	0.452111	-1.14525	0.00079091	0.00411099	Potri.006G059200
Potra001235g30674	288.085	396.722	179.449	0.452328	-1.14456	2.03334e-15	5.94459e-14	Potri.012G135100
Potra170784g27547	973.688	1340.66	606.72	0.452555	-1.14384	5.25962e-16	1.63389e-14	Potri.013G066600
Potra003935g23621	40.0293	55.1129	24.9457	0.45263	-1.1436	0.00523274	0.021467	Potri.018G104800
Potra000180g31277	42.0911	57.9493	26.233	0.452689	-1.14341	0.00040038	0.00225613	Potri.008G068500
Potra186954g28469	30.8009	42.4038	19.1981	0.452745	-1.14323	0.000214519	0.00129181	Potri.019G050500
Potra003559g22020	784.358	1079.12	489.595	0.453698	-1.1402	7.90764e-27	5.55192e-25	Potri.013G042800
Potra003734g22624	41.4728	57.0412	25.9044	0.454135	-1.13881	4.99144e-05	0.000347725	Potri.013G089600
Potra000548g03932	13.7223	18.8697	8.57492	0.454428	-1.13788	0.008202	0.0314148	Potri.004G135500
Potra002063g16086	95.3275	131.062	59.5933	0.454697	-1.13702	2.92742e-10	4.82746e-09	Potri.008G040000
Potra001018g08493	140.56	193.237	87.883	0.454794	-1.13672	1.06316e-13	2.60431e-12	Potri.010G113000
Potra001523g12667	757.708	1041.08	474.334	0.455617	-1.13411	2.49785e-27	1.81325e-25	Potri.014G091800
Potra007898g26051	28.3438	38.9416	17.7459	0.455705	-1.13383	0.000320889	0.00184409	Potri.019G018800
Potra003805g22921	53.5324	73.5136	33.5511	0.456394	-1.13165	7.06102e-07	6.97638e-06	Potri.013G159800
Potra148962g26639	934.312	1282.83	585.792	0.456639	-1.13087	1.7677e-18	6.84502e-17	Potri.002G239500
Potra004011g24203	515.899	707.937	323.862	0.457473	-1.12824	3.33556e-23	1.84005e-21	Potri.010G180500
Potra001270g10967	11.1006	15.2322	6.96895	0.457513	-1.12811	0.0099473	0.0370135	#N/A
Potra000673g05217	81.3649	111.622	51.1075	0.457861	-1.12702	7.8086e-09	1.07476e-07	Potri.008G130100
Potra182729g28252	35.5456	48.7398	22.3514	0.458586	-1.12474	0.000343869	0.00196397	Potri.014G136100
Potra002445g18534	372.426	510.593	234.259	0.458797	-1.12407	1.66762e-15	4.91672e-14	Potri.003G148400
Potra001061g09099	446.002	611.384	280.619	0.458991	-1.12346	1.68536e-22	8.92536e-21	Potri.008G072100
Potra001488g12417	34.8764	47.7945	21.9582	0.459429	-1.12209	7.61794e-05	0.00051012	Potri.001G305800
Potra003940g23654	191.804	262.838	120.77	0.459484	-1.12191	2.26012e-16	7.21447e-15	Potri.001G439600
Potra001327g30749	13.808	18.9201	8.69592	0.459612	-1.12151	0.0102255	0.0378661	Potri.010G197900
Potra000896g07270	189.513	259.657	119.368	0.459713	-1.1212	2.65975e-15	7.71105e-14	Potri.013G120300
Potra160510g26863	158.558	217.234	99.8821	0.45979	-1.12095	1.48952e-13	3.57011e-12	Potri.004G089500
Potra001735g14134	76.8763	105.324	48.4285	0.459804	-1.12091	2.0368e-08	2.60603e-07	Potri.015G073200
Potra150260g26667	79.8556	109.4	50.3113	0.459885	-1.12066	1.54338e-08	2.01363e-07	Potri.015G083400
Potra000998g08308	6626.93	9078.33	4175.53	0.459944	-1.12047	1.43026e-33	1.45129e-31	Potri.005G061600
Potra001695g13852	25.0416	34.3024	15.7808	0.460048	-1.12014	0.000311294	0.00179712	Potri.006G123100
Potra002559g19283	183.388	251.124	115.651	0.460535	-1.11862	1.75933e-14	4.68979e-13	Potri.007G134500
Potra001819g14677	105.166	144.003	66.3298	0.460615	-1.11837	1.11508e-09	1.70625e-08	Potri.007G127300
Potra000468g02804	354.785	485.762	223.809	0.460737	-1.11798	6.69102e-20	2.88867e-18	Potri.004G157000
Potra000947g07765	68.0906	93.2221	42.959	0.460824	-1.11771	4.72368e-08	5.74507e-07	Potri.005G078600
Potra006783g25796	14.2046	19.4459	8.96341	0.460942	-1.11734	0.0102208	0.0378588	Potri.T180100
Potra001912g15179	19.8821	27.2152	12.549	0.461104	-1.11684	0.00189822	0.00888939	Potri.010G163100
Potra000524g03557	132.624	181.498	83.7509	0.461442	-1.11578	3.45276e-12	7.21783e-11	Potri.001G185900
Potra186376g28435	126.827	173.553	80.1015	0.461539	-1.11548	7.57611e-11	1.35198e-09	Potri.010G085700
Potra000003g00024	77.3068	105.781	48.8323	0.461635	-1.11517	9.02867e-09	1.2269e-07	Potri.002G095100
Potra000783g06183	293.994	402.163	185.826	0.462067	-1.11383	5.34801e-18	1.97203e-16	Potri.010G212200
Potra002114g16420	384.923	526.545	243.3	0.46207	-1.11382	5.70308e-21	2.71977e-19	Potri.009G115600
Potra001463g12296	235.954	322.69	149.218	0.46242	-1.11273	1.32661e-14	3.57054e-13	Potri.012G070900
Potra001682g13757	194.8	266.381	123.219	0.462569	-1.11226	6.36019e-15	1.77721e-13	Potri.009G040600
Potra001092g09507	268.31	366.809	169.81	0.462939	-1.11111	2.19021e-17	7.56454e-16	Potri.T030000
Potra001247g10724	30.235	41.333	19.1369	0.462993	-1.11094	0.00857161	0.0325792	Potri.008G097900
Potra002210g17020	124.988	170.861	79.1148	0.463036	-1.1108	9.75528e-12	1.93595e-10	Potri.014G045500
Potra003908g23460	20.1767	27.5783	12.7751	0.463231	-1.1102	0.00184528	0.00866042	Potri.010G074700
Potra000418g02150	115.387	157.714	73.0596	0.463241	-1.11016	4.20602e-12	8.72036e-11	Potri.007G135400
Potra001698g13871	329.053	449.638	208.468	0.463634	-1.10894	5.51584e-13	1.256e-11	Potri.016G118300
Potra003119g20785	98.2809	134.273	62.2884	0.463892	-1.10814	1.62744e-09	2.42355e-08	Potri.011G044900
Potra003723g22578	50.2977	68.7173	31.8781	0.463902	-1.10811	0.0041061	0.0174453	Potri.014G125300
Potra001645g13488	38.4448	52.5146	24.375	0.464157	-1.10732	4.4777e-05	0.000314934	Potri.002G126700
Potra000541g03810	218.885	298.987	138.784	0.464181	-1.10724	2.76966e-14	7.27148e-13	Potri.007G011700
Potra000987g08160	19.9348	27.2216	12.6481	0.464636	-1.10583	0.00119707	0.00593581	Potri.001G468100
Potra000687g05333	1460.55	1994.07	927.032	0.464895	-1.10502	9.09111e-22	4.53789e-20	Potri.006G096800
Potra002060g16071	730.618	997.377	463.86	0.46508	-1.10445	4.97417e-27	3.55754e-25	Potri.001G009100
Potra000760g06009	59.7953	81.6209	37.9697	0.465196	-1.10409	1.57635e-06	1.46825e-05	Potri.003G215200
Potra001919g15228	284.046	387.689	180.403	0.46533	-1.10367	1.14705e-11	2.26501e-10	Potri.017G110200
Potra179937g28056	361.266	493.076	229.457	0.465359	-1.10358	9.91498e-22	4.93142e-20	Potri.019G019800
Potra003114g20769	938.507	1280.9	596.115	0.465387	-1.1035	5.48734e-23	2.98561e-21	Potri.016G030900
Potra001981g15599	68.6095	93.6039	43.615	0.465952	-1.10175	3.68412e-07	3.86819e-06	Potri.010G228000
Potra003893g23381	102.314	139.583	65.0442	0.46599	-1.10163	1.69401e-10	2.90373e-09	Potri.003G116200
Potra002565g19317	46.312	63.1706	29.4534	0.466252	-1.10082	1.38865e-05	0.000108239	Potri.016G030100
Potra001684g13796	71.1322	97.0221	45.2423	0.46631	-1.10064	2.12372e-06	1.93023e-05	Potri.007G007100
Potra001024g08552	216.137	294.755	137.52	0.466558	-1.09987	1.26219e-15	3.77342e-14	Potri.016G078200
Potra001999g15694	78.3212	106.795	49.8474	0.466758	-1.09925	9.31403e-09	1.26321e-07	Potri.008G144300
Potra168282g33767	38.4426	52.4144	24.4707	0.466869	-1.09891	0.000592605	0.00319059	Potri.015G067000
Potra001282g11067	15.0253	20.4851	9.56545	0.466947	-1.09867	0.0110779	0.040521	Potri.009G084800
Potra002479g18754	178.765	243.692	113.838	0.467141	-1.09807	1.72699e-09	2.56493e-08	Potri.004G126800
Potra000016g00081	56.8654	77.5014	36.2295	0.467469	-1.09706	1.2861e-06	1.21831e-05	Potri.008G138000
Potra001115g09806	282.984	385.565	180.403	0.467891	-1.09576	1.85142e-17	6.4667e-16	Potri.004G014100
Potra001703g13894	80.9867	110.314	51.6596	0.468297	-1.0945	5.54623e-09	7.7919e-08	Potri.010G115800
Potra001206g10433	935.539	1274.28	596.795	0.468339	-1.09438	1.10523e-26	7.66304e-25	Potri.002G091700
Potra003976g23916	67.2973	91.6321	42.9624	0.468858	-1.09278	4.66322e-08	5.67651e-07	Potri.019G090500
Potra001006g08370	172.516	234.883	110.15	0.468958	-1.09247	5.67703e-13	1.29058e-11	Potri.015G067000
Potra001534g12734	273.121	371.843	174.399	0.469013	-1.0923	6.10403e-17	2.0447e-15	Potri.003G184000
Potra000195g00845	200.504	272.899	128.109	0.469436	-1.091	2.06227e-07	2.24764e-06	Potri.016G087000
Potra175317g27787	71.9651	97.9493	45.981	0.469437	-1.091	2.33201e-05	0.000173639	Potri.001G170100
Potra002006g15739	297.332	404.574	190.091	0.469854	-1.08972	4.59826e-17	1.56099e-15	Potri.011G058400
Potra000747g05884	1382.49	1880.98	883.999	0.469968	-1.08936	4.15101e-28	3.17062e-26	Potri.018G083700
Potra000850g06874	57.2358	77.8709	36.6008	0.470019	-1.08921	4.17223e-06	3.59357e-05	Potri.015G029200
Potra177094g27929	25.5323	34.7343	16.3303	0.470149	-1.08881	0.0086105	0.0327046	Potri.015G006200
Potra001324g11365	941.323	1280.57	602.074	0.470161	-1.08877	3.93728e-22	2.03472e-20	#N/A
Potra000577g04303	36.7829	50.0297	23.5361	0.470443	-1.08791	3.39638e-05	0.000245399	Potri.009G024100
Potra002104g16362	35.3053	48.0198	22.5908	0.470448	-1.08789	8.70338e-05	0.000575321	Potri.008G164800
Potra003405g21572	219.585	298.648	140.522	0.470527	-1.08765	8.47384e-12	1.70107e-10	Potri.014G178100
Potra001056g09044	40.1008	54.5246	25.6769	0.470923	-1.08644	1.50763e-05	0.000116824	Potri.017G109300
Potra004009g24166	211.183	287.109	135.257	0.4711	-1.0859	2.14218e-14	5.6669e-13	Potri.008G085600
Potra173766g27671	61.6982	83.8621	39.5344	0.471421	-1.08491	3.67964e-07	3.86494e-06	Potri.013G025800
Potra001079g09322	41.7312	56.7219	26.7406	0.471434	-1.08487	0.00176944	0.00835666	Potri.002G176300
Potra001053g09003	66.3673	90.2044	42.5301	0.471485	-1.08472	3.8345e-07	4.01698e-06	Potri.013G023200
Potra001051g08941	43.3013	58.8507	27.7519	0.471565	-1.08447	8.76399e-05	0.00057864	Potri.014G102000
Potra001083g09384	351.745	477.899	225.591	0.472046	-1.083	1.14242e-18	4.49897e-17	Potri.018G005600
Potra001989g15629	31.7581	43.13	20.3862	0.47267	-1.08109	0.000362647	0.00206189	Potri.010G169900
Potra000351g01280	229.928	312.228	147.629	0.472824	-1.08063	1.23446e-05	9.72282e-05	Potri.006G016200
Potra001248g10743	151.61	205.859	97.3606	0.472949	-1.08024	1.74018e-12	3.74765e-11	Potri.008G150200
Potra007457g25970	30.5216	41.4334	19.6098	0.473285	-1.07922	0.000561226	0.00303989	Potri.003G018600
Potra001477g12353	74.6294	101.292	47.9664	0.473543	-1.07843	1.2803e-07	1.43765e-06	Potri.010G038100
Potra001421g12032	281.915	382.63	181.199	0.473561	-1.07838	8.67753e-09	1.18207e-07	Potri.009G113600
Potra000643g33113	213.157	289.276	137.037	0.473724	-1.07788	1.84804e-11	3.58305e-10	Potri.013G147700
Potra000178g00694	127.909	173.585	82.2324	0.473729	-1.07787	8.35421e-06	6.8095e-05	Potri.001G041800
Potra002580g19403	15.4607	20.9795	9.94185	0.473884	-1.07739	0.0083594	0.0319034	Potri.013G155100
Potra002563g19308	22.4044	30.4019	14.407	0.473884	-1.07739	0.00284501	0.0126844	Potri.005G101700
Potra003829g23022	100.262	136.046	64.4787	0.473949	-1.0772	2.50341e-10	4.1678e-09	Potri.009G058100
Potra000556g04013	888.854	1206.07	571.635	0.473964	-1.07715	5.49941e-27	3.92051e-25	Potri.006G114400
Potra003849g23144	12.3449	16.7476	7.94227	0.474234	-1.07633	0.0114651	0.0417014	Potri.001G381500
Potra001405g11932	30.6111	41.5272	19.6951	0.474269	-1.07622	0.00110991	0.00554617	Potri.001G253300
Potra001939g15352	36.7965	49.9166	23.6765	0.474321	-1.07607	7.4694e-05	0.000501622	Potri.005G113400
Potra002827g20072	72.7548	98.6626	46.847	0.47482	-1.07455	1.329e-07	1.48753e-06	Potri.016G020100
Potra001346g11556	22.6287	30.6712	14.5861	0.475562	-1.07229	0.00216804	0.00998809	Potri.004G140100
Potra003902g23430	38.7981	52.5773	25.0189	0.47585	-1.07142	0.000112373	0.000722381	Potri.001G467400
Potra002498g18879	229.307	310.739	147.876	0.475884	-1.07132	2.15516e-16	6.89526e-15	Potri.002G234700
Potra001405g11927	30.9416	41.9281	19.9552	0.475938	-1.07115	0.000303772	0.00175844	Potri.009G047100
Potra000525g03593	82.1819	111.359	53.0046	0.475979	-1.07103	1.71465e-05	0.000131184	Potri.007G023300
Potra001323g11361	51.7	70.0508	33.3493	0.476072	-1.07075	0.00677608	0.0267379	Potri.005G244500
Potra170384g27515	108.06	146.369	69.7509	0.476541	-1.06933	3.53683e-10	5.77419e-09	Potri.004G044800
Potra000974g08066	41.2445	55.8582	26.6309	0.476758	-1.06867	5.88061e-05	0.000403203	Potri.017G148700
Potra002279g17471	385.651	522.288	249.015	0.476777	-1.06861	7.29454e-20	3.13462e-18	Potri.004G212600
Potra010016g26471	598.942	811.019	386.865	0.477011	-1.0679	1.49813e-15	4.44057e-14	Potri.001G354900
Potra000025g00125	121.469	164.394	78.5433	0.477774	-1.0656	1.7245e-10	2.95417e-09	Potri.017G086800
Potra000494g03159	22.3499	30.2395	14.4604	0.478195	-1.06433	0.00275161	0.0123312	Potri.008G117900
Potra000537g03758	54.3303	73.5009	35.1597	0.478357	-1.06384	1.68043e-06	1.55684e-05	Potri.006G220200
Potra000849g06856	68.5622	92.7338	44.3906	0.478688	-1.06284	1.92404e-07	2.10773e-06	Potri.010G092200
Potra000554g04001	55.3709	74.8908	35.851	0.47871	-1.06278	4.23525e-06	3.63996e-05	Potri.010G185800
Potra005572g25431	34.7032	46.9366	22.4698	0.478727	-1.06273	0.000407081	0.00228925	Potri.008G131500
Potra002601g19532	34.0427	46.0414	22.0439	0.478784	-1.06255	5.74564e-05	0.000394727	Potri.009G038600
Potra003682g22422	24.8528	33.595	16.1106	0.479553	-1.06024	0.000460762	0.00255412	Potri.009G118300
Potra002210g17018	55.3608	74.8341	35.8875	0.479561	-1.06021	4.19673e-06	3.60909e-05	Potri.014G045600
Potra000820g06548	14.886	20.122	9.64987	0.479567	-1.0602	0.00964884	0.0360428	Potri.001G114400
Potra000775g06113	230.012	310.87	149.155	0.479797	-1.0595	4.35952e-16	1.35883e-14	Potri.T022600
Potra003788g22864	19.0389	25.7316	12.3462	0.479806	-1.05948	0.00294754	0.0130744	Potri.001G058200
Potra000827g06591	36.3932	49.1844	23.602	0.479868	-1.05929	9.61404e-05	0.000629235	Potri.008G109200
Potra001623g13350	213.225	288.143	138.307	0.479993	-1.05891	7.73735e-15	2.12781e-13	Potri.013G036300
Potra001741g14194	105.364	142.382	68.3465	0.480023	-1.05882	4.9837e-10	7.97249e-09	Potri.002G023800
Potra003274g21195	141.987	191.853	92.12	0.480159	-1.05842	4.35224e-11	8.04022e-10	Potri.002G230700
Potra001110g09738	23.4597	31.6981	15.2213	0.480195	-1.05831	0.00060186	0.00323228	Potri.002G238500
Potra001406g11934	85.8075	115.892	55.723	0.480818	-1.05644	4.38085e-07	4.52791e-06	Potri.017G000100
Potra003413g21589	18.309	24.7236	11.8945	0.481098	-1.0556	0.00590924	0.0238039	Potri.007G096400
Potra001253g10790	14.6192	19.7401	9.49826	0.481167	-1.05539	0.0076858	0.0297367	Potri.004G174800
Potra000182g00731	19.4181	26.2199	12.6162	0.48117	-1.05538	0.00482779	0.020019	Potri.010G099000
Potra187402g28502	105.071	141.855	68.288	0.481394	-1.05471	9.90759e-06	7.94292e-05	Potri.016G134600
Potra002311g17626	24104.3	32536.9	15671.8	0.481663	-1.0539	7.40812e-23	3.98391e-21	Potri.007G016400
Potra003012g20532	40.8321	55.113	26.5512	0.481758	-1.05362	9.71785e-05	0.000634878	Potri.008G078900
Potra000626g04770	61.742	83.3304	40.1536	0.481861	-1.05331	4.23169e-07	4.38842e-06	Potri.016G070200
Potra000310g01111	62.4355	84.2571	40.6139	0.482024	-1.05282	1.00979e-07	1.1544e-06	Potri.006G046700
Potra001354g11606	30.6959	41.4147	19.9771	0.482367	-1.0518	0.000153545	0.000957821	Potri.001G166800
Potra193566g28891	15.1629	20.4538	9.8721	0.482654	-1.05094	0.0137266	0.0484561	Potri.004G147000
Potra000997g08294	129.186	174.248	84.1234	0.482779	-1.05056	1.47696e-10	2.5601e-09	Potri.008G052500
Potra000997g08280	352.84	475.864	229.817	0.482946	-1.05007	8.26026e-16	2.50174e-14	Potri.010G209900
Potra166681g27226	21.5873	29.1122	14.0625	0.483043	-1.04978	0.00580277	0.0234465	Potri.015G014000
Potra000434g02353	35.6968	48.1323	23.2613	0.48328	-1.04907	8.39242e-05	0.000556751	Potri.002G103500
Potra002031g15898	630.602	850.156	411.047	0.483496	-1.04842	1.02746e-23	5.87786e-22	Potri.016G066500
Potra000522g03532	53.7647	72.48	35.0495	0.483574	-1.04819	4.3895e-05	0.000309592	Potri.017G094500
Potra004107g24517	47.7277	64.3414	31.1141	0.483578	-1.04818	4.31644e-05	0.000304981	Potri.001G192200
Potra001750g14269	31.2388	42.1094	20.3682	0.483696	-1.04783	0.000330953	0.00189839	Potri.015G099700
Potra003675g22401	230.235	310.275	150.195	0.484071	-1.04671	2.66891e-06	2.38291e-05	Potri.006G134300
Potra003512g21860	32.8133	44.2193	21.4074	0.484119	-1.04657	0.000670787	0.00356186	Potri.014G110600
Potra002532g19085	596.149	803.362	388.936	0.484135	-1.04652	8.31357e-21	3.87822e-19	Potri.006G230800
Potra000151g00536	14.0876	18.9823	9.1929	0.484287	-1.04607	0.00722251	0.0281875	Potri.009G151400
Potra000354g01365	486.458	655.215	317.702	0.484882	-1.0443	6.97487e-21	3.30925e-19	Potri.005G217800
Potra002228g31708	45.0152	60.6036	29.4267	0.48556	-1.04228	0.000790042	0.00410724	Potri.002G072000
Potra001957g15455	44.3412	59.6958	28.9866	0.485573	-1.04224	0.000600609	0.00322618	Potri.001G190100
Potra001570g12999	11837.6	15932	7743.29	0.486022	-1.04091	1.77327e-30	1.50771e-28	Potri.003G161900
Potra003776g22806	18.0957	24.3542	11.8372	0.486045	-1.04084	0.0126576	0.0454499	Potri.001G246300
Potra004043g24373	156.78	210.999	102.562	0.48608	-1.04073	1.03662e-10	1.82298e-09	Potri.007G043900
Potra000487g03018	159.052	214.041	104.063	0.486183	-1.04043	4.95097e-12	1.01738e-10	Potri.003G217700
Potra002395g18221	2465.7	3318.15	1613.25	0.48619	-1.04041	2.09131e-27	1.53416e-25	Potri.015G142000
Potra000279g01038	21.8156	29.3564	14.2747	0.486256	-1.04021	0.00387665	0.0166069	Potri.004G095700
Potra001414g11999	146.426	197.006	95.8468	0.486517	-1.03944	8.8042e-06	7.13862e-05	Potri.003G160500
Potra198679g29340	15.9891	21.5054	10.4729	0.486987	-1.03804	0.0131165	0.0467478	Potri.010G025800
Potra004391g24880	65.1604	87.6253	42.6955	0.487251	-1.03726	1.15923e-05	9.17187e-05	Potri.011G068500
Potra001646g13498	87.172	117.225	57.1187	0.487256	-1.03725	3.59052e-08	4.44467e-07	Potri.004G172000
Potra005676g25462	23.0696	31.0155	15.1236	0.487614	-1.03619	0.00656244	0.0260242	Potri.011G166800
Potra001524g30891	42.1548	56.6722	27.6373	0.48767	-1.03602	4.61497e-05	0.000323933	Potri.003G091800
Potra002788g19972	272.425	366.12	178.731	0.488176	-1.03453	1.92223e-10	3.26274e-09	Potri.013G002200
Potra001151g10023	21.2483	28.5552	13.9415	0.488228	-1.03437	0.00631065	0.0251982	Potri.001G349100
Potra002464g31875	13.7486	18.4754	9.02193	0.488322	-1.03409	0.0139379	0.0490683	Potri.006G028500
Potra000972g08020	145.114	194.996	95.2328	0.488383	-1.03392	1.81846e-11	3.52816e-10	Potri.017G063000
Potra001796g14561	1106.18	1486.24	726.108	0.488552	-1.03342	2.93114e-23	1.62339e-21	Potri.008G139700
Potra000493g03140	373.439	501.558	245.321	0.489117	-1.03175	2.27983e-11	4.35943e-10	Potri.007G046900
Potra001112g09770	1229.38	1650.42	808.344	0.489781	-1.02979	3.44287e-24	2.06298e-22	Potri.004G217800
Potra003240g21107	93.2665	125.19	61.3435	0.490005	-1.02913	1.14894e-08	1.53724e-07	Potri.001G058600
Potra173075g27626	33.9095	45.5155	22.3036	0.490021	-1.02908	0.000434618	0.00242654	Potri.003G030400
Potra000945g07741	997.216	1338.49	655.942	0.490061	-1.02897	1.10167e-20	5.07956e-19	Potri.018G099800
Potra004163g24643	526.3	706.317	346.284	0.490267	-1.02836	6.41675e-21	3.04966e-19	Potri.007G031500
Potra002943g20363	1451.8	1947.93	955.678	0.490613	-1.02734	1.91388e-26	1.31063e-24	Potri.011G156100
Potra000915g07418	337.568	452.911	222.226	0.49066	-1.0272	1.98964e-12	4.24544e-11	Potri.004G140600
Potra000941g07702	74.3948	99.8086	48.981	0.490749	-1.02694	6.73182e-07	6.68445e-06	Potri.003G108000
Potra001647g13503	680.808	913.061	448.555	0.491265	-1.02543	9.30039e-11	1.64386e-09	Potri.005G045800
Potra003619g22189	20.164	27.0339	13.2941	0.491758	-1.02398	0.00519764	0.0213393	Potri.019G118600
Potra000454g02591	51.0329	68.4172	33.6485	0.491814	-1.02382	1.86129e-05	0.000141276	Potri.010G077300
Potra004489g24978	16.9241	22.6889	11.1593	0.491841	-1.02373	0.00501897	0.0207159	Potri.T112500
Potra000397g01851	21.7436	29.15	14.3372	0.491844	-1.02373	0.0056762	0.0229917	Potri.002G213200
Potra003868g23245	253.363	339.544	167.182	0.492373	-1.02218	4.43178e-15	1.2522e-13	Potri.001G266000
Potra000531g03706	32.3199	43.3117	21.3281	0.492432	-1.022	6.73278e-05	0.000456008	Potri.008G198800
Potra001650g13528	59.2957	79.4486	39.1428	0.49268	-1.02128	2.29601e-05	0.000171096	Potri.003G082600
Potra003561g22025	91.1364	122.077	60.1954	0.493092	-1.02007	9.07286e-08	1.04713e-06	Potri.002G263000
Potra000689g05355	127.519	170.799	84.2397	0.49321	-1.01973	2.60785e-10	4.3339e-09	Potri.015G121400
Potra001049g08921	60.0711	80.4562	39.686	0.493262	-1.01957	4.50458e-06	3.84508e-05	Potri.003G163600
Potra001604g13226	636.961	853.092	420.831	0.493301	-1.01946	4.0141e-20	1.76589e-18	Potri.006G063700
Potra004072g24437	59.8617	80.1684	39.555	0.493399	-1.01917	2.53956e-06	2.27839e-05	Potri.005G235700
Potra003237g21094	75.4808	101.073	49.8888	0.493593	-1.01861	6.07892e-07	6.09932e-06	Potri.006G013000
Potra001824g14708	422.197	565.267	279.127	0.493797	-1.01801	2.63974e-17	9.08325e-16	Potri.002G049800
Potra000829g06638	75.1496	100.61	49.6894	0.493882	-1.01776	3.00215e-07	3.19558e-06	#N/A
Potra001734g14123	19.6419	26.295	12.9888	0.493965	-1.01752	0.00897704	0.0338634	Potri.014G077000
Potra001977g31564	82.9253	110.997	54.8539	0.494194	-1.01685	1.4647e-05	0.000113656	Potri.003G187500
Potra001020g08523	24.0192	32.1487	15.8898	0.494259	-1.01666	0.0134503	0.0476987	Potri.009G077500
Potra007560g34156	26.3301	35.2416	17.4186	0.494262	-1.01665	0.00203316	0.00944021	Potri.005G043400
Potra002526g19060	19.4184	25.9883	12.8484	0.494392	-1.01627	0.00556931	0.0226379	Potri.001G148500
Potra000123g00399	46.2312	61.8681	30.5942	0.494506	-1.01594	5.25787e-06	4.42447e-05	Potri.003G205800
Potra000740g05834	19.3691	25.9131	12.8251	0.494928	-1.01471	0.00163397	0.00778831	Potri.015G127100
Potra001363g11663	30.8671	41.2894	20.4448	0.495157	-1.01404	0.000383313	0.00216743	Potri.018G038400
Potra001058g09074	173.199	231.671	114.726	0.495212	-1.01388	1.02573e-10	1.80495e-09	Potri.013G040000
Potra000623g36129	24.985	33.4197	16.5504	0.495228	-1.01384	0.00224167	0.0102915	#N/A
Potra001091g09502	275.495	368.481	182.509	0.4953	-1.01362	5.99044e-12	1.22106e-10	Potri.007G091600
Potra000927g07528	57.7636	77.2572	38.2699	0.495358	-1.01346	1.09281e-05	8.69592e-05	Potri.007G099700
Potra001285g11083	92.0684	123.086	61.0507	0.496	-1.01159	6.32629e-09	8.83565e-08	Potri.016G050900
Potra003896g23391	73.3783	98.099	48.6575	0.496004	-1.01158	4.54523e-07	4.67522e-06	Potri.005G150100
Potra000651g05010	44.051	58.888	29.214	0.496094	-1.01131	0.0022394	0.0102844	Potri.003G204700
Potra000040g00193	243.944	326.089	161.798	0.496179	-1.01107	9.37491e-15	2.56042e-13	Potri.017G016000
Potra001145g09981	199.38	266.512	132.248	0.496218	-1.01095	1.33663e-13	3.23432e-12	Potri.002G168600
Potra009107g26289	273.043	364.974	181.113	0.496235	-1.0109	2.82829e-10	4.68344e-09	Potri.004G074000
Potra000795g06316	28.8056	38.5036	19.1076	0.496255	-1.01085	0.000274433	0.00160701	Potri.014G010300
Potra001379g11763	86.0968	115.078	57.1153	0.496316	-1.01067	7.54227e-08	8.82938e-07	Potri.004G053500
Potra003430g21640	388.762	519.29	258.234	0.497284	-1.00786	3.33969e-18	1.25817e-16	Potri.006G086000
Potra003430g21643	115.698	154.521	76.8753	0.497507	-1.00721	1.96383e-10	3.32524e-09	Potri.006G086300
Potra001553g12873	60.4894	80.7824	40.1963	0.497588	-1.00698	0.00168591	0.00800644	Potri.004G102800
Potra001450g12202	382.866	511.281	254.452	0.497675	-1.00672	7.35916e-08	8.64779e-07	Potri.010G043300
Potra003609g22165	70.9791	94.7684	47.1898	0.497949	-1.00593	1.89109e-07	2.07327e-06	Potri.007G047700
Potra000893g07240	23.0719	30.8028	15.341	0.498039	-1.00567	0.000852321	0.00439649	Potri.018G113400
Potra160729g30978	45.5687	60.8353	30.3022	0.498103	-1.00549	2.0256e-05	0.000152747	Potri.015G034800
Potra000358g01439	422.826	564.461	281.19	0.498156	-1.00533	5.10004e-19	2.0373e-17	Potri.009G147800
Potra001107g09682	23.5946	31.4977	15.6916	0.498184	-1.00525	0.0026211	0.0118207	Potri.001G021000
Potra008321g26140	295.194	393.943	196.445	0.498665	-1.00386	5.40744e-15	1.52015e-13	Potri.002G048600
Potra000961g07904	286.886	382.836	190.936	0.49874	-1.00364	3.68849e-15	1.05289e-13	Potri.011G119800
Potra002589g19465	135.905	181.335	90.4739	0.498932	-1.00309	8.70855e-10	1.35492e-08	Potri.014G140200
Potra001205g30655	109.554	146.132	72.9753	0.499381	-1.00179	6.18215e-08	7.3454e-07	Potri.011G150800
Potra000545g03871	48.2319	64.3101	32.1537	0.499979	-1.00006	0.000182824	0.00112258	Potri.010G066600
Potra000529g03661	646.616	862.063	431.168	0.500159	-0.999543	9.32255e-20	3.96323e-18	Potri.010G134200
Potra002472g18715	128.957	171.919	85.9953	0.500208	-0.999399	4.43234e-06	3.78848e-05	Potri.002G006400
Potra002024g15855	98.3712	131.137	65.6058	0.500286	-0.999176	2.83042e-08	3.55118e-07	Potri.008G022300
Potra000643g04915	52.1859	69.5626	34.8092	0.500401	-0.998845	2.1978e-05	0.000164331	Potri.013G148400
Potra000455g02610	103.696	138.212	69.1807	0.500541	-0.998439	8.5055e-09	1.16092e-07	Potri.016G141900
Potra003687g22444	330.791	440.716	220.865	0.501151	-0.996682	6.84249e-13	1.54167e-11	Potri.001G053400
Potra003760g22725	32.0446	42.6856	21.4035	0.501423	-0.9959	0.00297935	0.0132008	Potri.019G010600
Potra003213g21014	40.6092	54.0926	27.1257	0.501468	-0.995771	7.33763e-05	0.00049325	Potri.008G071300
Potra183829g28339	26.6612	35.5046	17.8178	0.501844	-0.994689	0.00126344	0.00622163	Potri.008G125400
Potra003996g24059	18.2098	24.2479	12.1718	0.501974	-0.994316	0.00414359	0.0175857	#N/A
Potra175723g27822	19.7662	26.32	13.2123	0.501986	-0.994281	0.00694792	0.0272689	Potri.005G012400
Potra002038g15931	79.3076	105.6	53.0154	0.502042	-0.994121	3.60422e-07	3.79187e-06	Potri.013G027800
Potra002352g17946	87.8564	116.868	58.8444	0.50351	-0.989909	2.67234e-07	2.87164e-06	Potri.001G324800
Potra000399g01878	31.9725	42.529	21.4159	0.503561	-0.989762	0.000541192	0.0029442	Potri.004G047700
Potra001519g12651	109.543	145.705	73.381	0.503627	-0.989572	5.38221e-05	0.000372521	Potri.017G122900
Potra000878g07089	37.5869	49.9917	25.1821	0.503725	-0.989291	0.00112067	0.0055929	Potri.016G080700
Potra002322g17729	36.975	49.1654	24.7846	0.504107	-0.988199	0.000106253	0.000686852	#N/A
Potra003410g21583	19.5843	26.0381	13.1304	0.504278	-0.987708	0.00491329	0.020328	Potri.016G103600
Potra001401g11901	163	216.689	109.31	0.504456	-0.987199	2.14032e-11	4.10395e-10	Potri.011G053100
Potra000645g04935	19.6532	26.1261	13.1804	0.504493	-0.987095	0.00769485	0.0297593	Potri.004G113400
Potra001598g13200	33.0673	43.9503	22.1843	0.504758	-0.986337	0.000232363	0.00138486	Potri.005G096400
Potra000736g05804	177.037	235.277	118.796	0.50492	-0.985873	1.89816e-12	4.06583e-11	Potri.006G267700
Potra000384g01730	77.9289	103.546	52.3116	0.505201	-0.98507	9.95426e-08	1.13986e-06	#N/A
Potra000884g07139	320.658	426.066	215.25	0.505203	-0.985064	8.70461e-15	2.38438e-13	Potri.002G180800
Potra001247g10733	11125.6	14782.8	7468.47	0.505214	-0.985033	5.96272e-26	3.97558e-24	Potri.008G099300
Potra000858g06943	218.613	290.472	146.753	0.505223	-0.985008	9.69577e-14	2.38982e-12	Potri.T154600
Potra009934g26451	31.5141	41.8714	21.1567	0.505278	-0.984852	0.00155398	0.00745178	Potri.010G070700
Potra001934g15332	30.2634	40.2064	20.3203	0.5054	-0.984502	0.000445879	0.00247836	Potri.002G181900
Potra179921g28053	27.6825	36.7754	18.5895	0.505488	-0.984252	0.00171199	0.00811541	Potri.004G039700
Potra001105g09660	24.6672	32.7685	16.5659	0.505543	-0.984096	0.0055791	0.0226662	Potri.002G159700
Potra181763g28181	2370.07	3147.71	1592.43	0.505902	-0.98307	1.33956e-21	6.61524e-20	Potri.004G188100
Potra003776g22805	378.014	501.959	254.068	0.506153	-0.982355	2.61763e-15	7.6048e-14	Potri.001G246200
Potra002239g17201	121.469	161.289	81.6502	0.506237	-0.982116	4.59933e-09	6.54428e-08	Potri.001G136200
Potra003376g21489	107.313	142.488	72.1376	0.506272	-0.982016	1.08205e-09	1.65845e-08	Potri.001G250500
Potra000754g05938	17.2678	22.9206	11.615	0.506751	-0.980652	0.0120156	0.0434647	Potri.018G145600
Potra001660g13629	574.434	762.462	386.406	0.506787	-0.980548	4.35842e-19	1.7613e-17	Potri.002G242700
Potra174349g27713	5560.61	7380.03	3741.19	0.506935	-0.980129	5.66769e-20	2.46217e-18	Potri.008G038200
Potra170475g27521	211.217	280.316	142.118	0.506992	-0.979965	7.71649e-08	9.01815e-07	Potri.010G100600
Potra004110g24520	21.7845	28.9058	14.6632	0.507275	-0.979159	0.00898427	0.033876	Potri.005G166400
Potra000989g08185	1352.82	1795.03	910.602	0.50729	-0.979116	4.53722e-09	6.46583e-08	Potri.012G039000
Potra000931g07591	67.8371	89.9977	45.6765	0.50753	-0.978436	4.30478e-06	3.69233e-05	Potri.003G140600
Potra002175g16777	26.3147	34.9095	17.72	0.507598	-0.978242	0.00692424	0.0271952	Potri.014G000700
Potra003864g23219	18.3725	24.3729	12.3721	0.507616	-0.97819	0.0140452	0.0493676	Potri.015G138900
Potra180645g28117	21.3262	28.286	14.3664	0.507899	-0.977387	0.007725	0.029851	Potri.018G106700
Potra001849g14835	40.6234	53.8796	27.3672	0.507932	-0.977292	6.36953e-05	0.000433943	Potri.006G037100
Potra001061g09106	229.363	304.177	154.55	0.508091	-0.976842	1.991e-13	4.70712e-12	Potri.018G032900
Potra002465g18670	71.2477	94.4867	48.0086	0.508099	-0.976817	0.00232445	0.0106224	Potri.003G126800
Potra001319g11317	48.258	63.9971	32.5189	0.50813	-0.97673	4.47063e-05	0.000314517	Potri.001G037000
Potra002416g18376	214.356	284.186	144.525	0.508558	-0.975517	1.07219e-06	1.02829e-05	Potri.017G070300
Potra001631g13410	36.8365	48.8337	24.8393	0.50865	-0.975255	9.22313e-05	0.00060583	Potri.001G098300
Potra008949g26261	208.34	276.142	140.538	0.508932	-0.974455	1.5571e-12	3.37428e-11	Potri.001G148700
Potra000423g02206	948.417	1257.06	639.775	0.508946	-0.974415	2.01455e-19	8.26112e-18	Potri.015G058400
Potra000527g03643	17.8823	23.6967	12.068	0.50927	-0.973496	0.0110563	0.0404537	Potri.011G006700
Potra001338g11475	26.0134	34.4713	17.5555	0.509279	-0.973471	0.00287646	0.0128061	Potri.010G045500
Potra003627g22209	42.3853	56.1647	28.6058	0.509321	-0.973354	0.000104482	0.00067666	Potri.006G057400
Potra001791g14537	14.4288	19.114	9.7437	0.509768	-0.972088	0.0102176	0.0378521	Potri.004G231000
Potra000435g02365	66.6893	88.3073	45.0713	0.510392	-0.970321	5.21423e-06	4.3904e-05	Potri.013G058300
Potra001745g14221	577.589	764.804	390.375	0.510424	-0.970232	6.15535e-18	2.2459e-16	Potri.008G018400
Potra000384g01731	25595.8	33888.7	17303	0.510581	-0.969787	7.62383e-19	3.01945e-17	Potri.002G189200
Potra004140g24620	29.57	39.1483	19.9918	0.510667	-0.969544	0.000950944	0.00484757	Potri.005G173100
Potra001329g11427	37.3032	49.3846	25.2218	0.510721	-0.969392	0.000620092	0.00331738	Potri.014G142800
Potra000071g00260	42.6304	56.4278	28.8329	0.510969	-0.968692	0.00724508	0.0282637	Potri.013G016900
Potra000865g06989	94.1667	124.619	63.7139	0.511268	-0.967848	1.60631e-06	1.49366e-05	Potri.005G133700
Potra003906g23445	112.772	149.237	76.3083	0.511324	-0.967691	5.47828e-08	6.58507e-07	Potri.006G262100
Potra002768g19939	66.2014	87.6063	44.7966	0.51134	-0.967646	6.00606e-06	5.02064e-05	Potri.018G023000
Potra000709g05542	26.1015	34.5403	17.6628	0.511367	-0.96757	0.00234614	0.0107076	Potri.004G187500
Potra003836g23055	24.0654	31.8358	16.295	0.511844	-0.966223	0.00302845	0.0133842	Potri.004G176400
Potra000579g04331	404.768	535.459	274.077	0.511855	-0.966194	1.06992e-16	3.51537e-15	Potri.001G373400
Potra002540g19130	96.6145	127.8	65.4288	0.511962	-0.965891	8.82714e-08	1.02004e-06	Potri.002G038000
Potra002000g15699	15.9363	21.0798	10.7928	0.511996	-0.965796	0.00541956	0.0221068	Potri.014G014300
Potra001485g12398	2054.97	2717.97	1391.97	0.512136	-0.965402	8.52743e-22	4.27186e-20	Potri.002G113100
Potra001140g09968	113.047	149.512	76.5813	0.512209	-0.965195	9.76804e-09	1.32028e-07	Potri.014G167800
Potra000967g07962	83.6719	110.658	56.6855	0.512257	-0.965059	1.95666e-06	1.78996e-05	Potri.001G471400
Potra003195g20969	21.3425	28.2234	14.4616	0.5124	-0.964659	0.00796506	0.0306424	Potri.007G105800
Potra188350g28594	806.637	1066.64	546.629	0.512475	-0.964445	1.45043e-15	4.3176e-14	Potri.002G059800
Potra004578g25086	54.4813	72.042	36.9207	0.512488	-0.964409	1.89693e-05	0.000143863	Potri.009G027800
Potra002176g16788	55.3843	73.2253	37.5433	0.51271	-0.963785	6.87213e-06	5.68479e-05	Potri.004G160800
Potra002322g17750	479.859	634.43	325.288	0.512724	-0.963745	1.94655e-18	7.52712e-17	Potri.016G006200
Potra001613g13291	327.281	432.678	221.884	0.512814	-0.963491	7.2439e-15	1.99804e-13	Potri.010G189900
Potra000654g05033	125.758	166.253	85.2621	0.512846	-0.963402	1.12745e-05	8.93452e-05	Potri.009G048700
Potra000349g35458	220.382	291.33	149.433	0.512935	-0.963152	6.31181e-12	1.28374e-10	Potri.009G011800
Potra001607g13251	90.8807	120.137	61.6248	0.512956	-0.963093	1.80978e-07	1.9904e-06	Potri.016G018400
Potra000890g07192	24.0829	31.8356	16.3303	0.512956	-0.963092	0.00449402	0.0188253	Potri.005G105400
Potra002783g19963	85.0615	112.43	57.6928	0.513144	-0.962564	4.87882e-07	4.98881e-06	Potri.019G020900
Potra000404g01913	655.131	865.795	444.466	0.513362	-0.961952	1.95195e-20	8.81009e-19	Potri.008G009500
Potra177213g27939	109.373	144.541	74.204	0.513377	-0.96191	4.48216e-08	5.47769e-07	Potri.014G066100
Potra001286g11098	15.3892	20.3348	10.4435	0.513579	-0.961342	0.0122359	0.0441395	Potri.006G202900
Potra000727g05696	17.8257	23.5529	12.0986	0.513679	-0.961062	0.00830641	0.0317535	Potri.008G106500
Potra001734g14110	33.2551	43.9315	22.5787	0.513953	-0.960292	0.000199087	0.00121025	Potri.008G181400
Potra002057g16045	5151.35	6804.82	3497.88	0.514029	-0.960077	7.04276e-25	4.38054e-23	Potri.002G099200
Potra001773g14431	60.0675	79.3294	40.8057	0.514382	-0.959087	1.00073e-05	8.01821e-05	Potri.003G140900
Potra001935g15337	630.358	832.482	428.234	0.514406	-0.95902	1.41059e-18	5.50051e-17	Potri.009G006900
Potra003213g21013	67.3191	88.902	45.7363	0.514458	-0.958876	7.66283e-06	6.29208e-05	Potri.008G071500
Potra003646g22276	35.7985	47.2744	24.3225	0.514496	-0.958768	0.00492012	0.0203502	Potri.010G011400
Potra000963g07913	389.397	514.218	264.577	0.514523	-0.958692	4.05032e-16	1.26957e-14	Potri.014G088800
Potra002373g18081	280.487	370.384	190.589	0.514572	-0.958554	2.79035e-14	7.31888e-13	Potri.005G258900
Potra001038g08762	35.3404	46.6611	24.0197	0.514769	-0.958003	0.00319285	0.0140261	Potri.012G031100
Potra002096g16310	28.8082	38.0337	19.5826	0.514875	-0.957705	0.00179904	0.00847777	Potri.004G090200
Potra000141g00492	93.9327	124.006	63.8594	0.514971	-0.957438	1.15468e-07	1.30814e-06	Potri.007G023700
Potra006965g33208	35.7461	47.1868	24.3053	0.515086	-0.957115	0.00875843	0.0331804	Potri.004G079700
Potra001095g33704	30.93	40.82	21.04	0.515433	-0.956144	0.000212357	0.00128017	Potri.010G107900
Potra000938g07662	269.787	356.021	183.552	0.515565	-0.955773	2.18063e-13	5.12927e-12	Potri.007G028800
Potra001570g13008	334.909	441.956	227.863	0.515577	-0.95574	6.40066e-15	1.78672e-13	Potri.003G162700
Potra000796g06317	33.3505	44.0063	22.6946	0.515713	-0.95536	0.00255409	0.0115541	Potri.014G166800
Potra001443g12129	30.8627	40.7199	21.0055	0.515854	-0.954966	0.000313759	0.00180951	Potri.014G118800
Potra001534g12735	6655.65	8781.27	4530.02	0.515872	-0.954914	1.57043e-24	9.57517e-23	Potri.003G183900
Potra004484g24973	109.26	144.153	74.3668	0.515888	-0.954872	2.41279e-08	3.05339e-07	Potri.010G192600
Potra000353g01346	61.7271	81.4392	42.015	0.515906	-0.954819	7.75517e-06	6.36226e-05	Potri.003G167900
Potra002196g16917	72.6577	95.8516	49.4637	0.516045	-0.954432	3.02078e-06	2.66287e-05	Potri.007G085700
Potra001604g13229	293.442	387.113	199.771	0.516053	-0.954409	4.50056e-14	1.14903e-12	Potri.006G064200
Potra167914g27321	41.1586	54.2931	28.0241	0.516164	-0.954099	0.00142024	0.00689729	Potri.015G124500
Potra002472g18714	34.8859	46.0161	23.7558	0.516249	-0.953861	0.00153265	0.00736471	Potri.002G006300
Potra000739g35383	22.8208	30.1015	15.54	0.516254	-0.953848	0.0080736	0.0310042	Potri.009G110400
Potra001506g30866	17.9696	23.6969	12.2424	0.516625	-0.952811	0.00624364	0.0249521	Potri.008G156900
Potra001806g14608	44.6435	58.8569	30.4302	0.51702	-0.951709	0.00130409	0.00640483	Potri.009G033300
Potra002407g18314	31.8727	42.0095	21.736	0.517406	-0.950631	0.00293546	0.0130271	Potri.006G213000
Potra001304g11213	199.85	263.401	136.299	0.51746	-0.950481	1.26522e-11	2.48953e-10	Potri.014G068300
Potra000786g06227	99.3318	130.893	67.7708	0.517758	-0.94965	6.28833e-08	7.4588e-07	Potri.005G038100
Potra000508g03312	712.667	939.101	486.232	0.517763	-0.949636	3.40588e-20	1.50786e-18	Potri.010G236500
Potra001488g12418	105.675	139.238	72.1118	0.517902	-0.94925	5.85287e-08	7.00203e-07	Potri.001G305900
Potra002198g16923	26.3914	34.7721	18.0107	0.517964	-0.949077	0.0018588	0.00871947	Potri.001G239100
Potra007866g26050	96.268	126.824	65.7122	0.518138	-0.948591	3.88813e-07	4.06413e-06	Potri.018G101200
Potra000414g02070	91.1124	120.017	62.2074	0.518319	-0.948087	1.98948e-05	0.000150146	Potri.017G090300
Potra000516g03422	65.3925	86.1348	44.6502	0.518376	-0.947929	1.04143e-05	8.32039e-05	Potri.014G016400
Potra003195g20972	378.144	497.978	258.309	0.518717	-0.946981	1.75288e-14	4.67708e-13	Potri.007G106100
Potra197528g29230	48.6571	64.0723	33.2419	0.518819	-0.946698	0.000182146	0.00111867	Potri.011G036100
Potra002550g19203	55.9132	73.6258	38.2006	0.518848	-0.946616	0.000315053	0.0018158	#N/A
Potra001393g11835	244.334	321.718	166.95	0.518933	-0.94638	3.75643e-07	3.94114e-06	Potri.005G021900
Potra002483g18777	144.816	190.664	98.9688	0.519075	-0.945986	1.733e-05	0.000132333	Potri.009G087100
Potra004509g25008	19.7344	25.9818	13.487	0.519096	-0.945927	0.0102692	0.0379978	Potri.003G030500
Potra000598g04537	394.339	518.945	269.732	0.51977	-0.944055	1.45261e-16	4.70161e-15	Potri.009G055100
Potra001915g15194	374.339	492.606	256.072	0.519831	-0.943885	1.99837e-14	5.29654e-13	Potri.014G047500
Potra001242g10676	98.4587	129.547	67.3707	0.52005	-0.943278	8.93887e-07	8.68673e-06	Potri.014G104800
Potra002390g18192	34.5443	45.4466	23.642	0.520216	-0.942818	0.000704621	0.00371626	Potri.005G072100
Potra001161g10086	80.7304	106.201	55.26	0.520335	-0.942486	8.93732e-07	8.68673e-06	Potri.012G015100
Potra172818g27605	358.646	471.775	245.517	0.520412	-0.942273	6.09627e-05	0.000417269	Potri.016G132200
Potra003688g22445	45.6488	60.0461	31.2514	0.520458	-0.942147	0.00924923	0.034718	Potri.001G183700
Potra001962g15494	101.976	134.136	69.8164	0.52049	-0.942058	1.97383e-08	2.52936e-07	Potri.005G127900
Potra000448g02512	50.6959	66.6766	34.7152	0.52065	-0.941613	2.39928e-05	0.000178123	Potri.006G153600
Potra001274g11008	122.885	161.602	84.1687	0.520841	-0.941085	0.0010372	0.00522509	Potri.006G033400
Potra001667g13699	65.4441	86.0472	44.841	0.521121	-0.940311	8.55264e-06	6.95697e-05	Potri.012G016100
Potra001448g12195	29.7846	39.161	20.4082	0.521136	-0.940269	0.000815169	0.00422681	Potri.001G333500
Potra000365g01475	2992.31	3933.7	2050.92	0.521372	-0.939614	7.03805e-19	2.79143e-17	Potri.004G007600
Potra003752g22693	460.312	605.092	315.531	0.521459	-0.939375	5.13474e-17	1.73675e-15	Potri.003G166900
Potra002176g31676	71.8824	94.4868	49.2781	0.521534	-0.939167	2.07279e-06	1.88888e-05	Potri.004G160700
Potra000862g06971	167.584	220.277	114.892	0.521578	-0.939046	1.90159e-10	3.23165e-09	Potri.006G203200
Potra002050g16004	28.4003	37.3264	19.4741	0.521726	-0.938636	0.00238495	0.0108543	Potri.017G049300
Potra002150g31658	64.1464	84.3067	43.9861	0.521739	-0.938599	1.27782e-05	0.000100416	Potri.008G091600
Potra003761g22732	37.4184	49.1779	25.6588	0.521756	-0.938554	0.000434602	0.00242654	Potri.005G054900
Potra003696g22473	26.2313	34.4713	17.9913	0.521921	-0.938096	0.00241453	0.0109745	Potri.002G112100
Potra194552g31515	1819.81	2391.24	1248.37	0.522061	-0.93771	1.26634e-23	7.21477e-22	Potri.006G233300
Potra001734g14111	29.0801	38.1966	19.9637	0.522658	-0.936061	0.00249825	0.0113162	Potri.008G181500
Potra002457g18624	24.8055	32.5809	17.0301	0.522702	-0.935939	0.0038246	0.0164072	Potri.006G276400
Potra002402g18269	6178.63	8114.48	4242.79	0.522867	-0.935484	5.97645e-16	1.83809e-14	Potri.005G162800
Potra000429g02263	26.5644	34.8847	18.2442	0.522984	-0.935162	0.00287776	0.0128099	Potri.002G155700
Potra181140g28133	159.649	209.583	109.715	0.523492	-0.933762	5.26593e-09	7.44703e-08	Potri.014G130100
Potra007861g26046	368.191	483.315	253.067	0.523608	-0.933442	1.23496e-14	3.33679e-13	Potri.008G186900
Potra000801g06349	160.554	210.742	110.366	0.523702	-0.933181	1.96319e-10	3.32524e-09	Potri.019G057700
Potra002576g19378	224.674	294.848	154.501	0.524002	-0.932355	5.21745e-09	7.38223e-08	Potri.005G230900
Potra000524g03562	31.1229	40.8384	21.4074	0.524197	-0.931819	0.00444371	0.0186486	Potri.003G052200
Potra002325g17784	321.063	421.259	220.868	0.524305	-0.931521	1.46023e-13	3.50897e-12	Potri.014G050000
Potra001259g10861	20.7327	27.2028	14.2626	0.524307	-0.931515	0.00327351	0.0143148	Potri.005G109000
Potra000803g06375	63.8512	83.7622	43.9401	0.524582	-0.930761	1.6217e-05	0.000124932	Potri.009G043800
Potra001039g08772	36.9876	48.5205	25.4547	0.524617	-0.930664	0.000509465	0.00279161	Potri.004G072500
Potra002123g16469	41.4218	54.3367	28.5069	0.524634	-0.930618	0.000965191	0.00490948	Potri.001G044900
Potra001730g14077	82.377	108.06	56.6942	0.524655	-0.930558	2.01631e-06	1.84212e-05	Potri.002G011400
Potra001821g14694	29.0901	38.1591	20.0211	0.524674	-0.930505	0.00645305	0.0256636	Potri.008G020700
Potra001884g15004	34.2474	44.9206	23.5741	0.524795	-0.930175	0.00616611	0.0246884	Potri.005G085400
Potra000669g05184	76.6677	100.56	52.7759	0.524822	-0.9301	7.8156e-07	7.67292e-06	Potri.016G056400
Potra002050g16002	117.333	153.851	80.8151	0.525283	-0.928834	4.47345e-08	5.46945e-07	Potri.017G050100
Potra000423g02204	80.6072	105.693	55.521	0.525303	-0.928779	4.33213e-06	3.71289e-05	Potri.015G058200
Potra186017g28402	97.734	128.144	67.3238	0.525375	-0.928581	0.00105577	0.00530678	Potri.009G051100
Potra000266g01008	73.4123	96.2458	50.5787	0.525516	-0.928195	3.45422e-06	3.01815e-05	Potri.005G134900
Potra001872g14971	747.746	980.09	515.402	0.525872	-0.927216	4.21735e-18	1.57178e-16	Potri.002G034600
Potra167834g27315	34.0384	44.6139	23.4629	0.525911	-0.92711	0.000994033	0.00503683	Potri.019G095500
Potra004018g24264	35.78	46.893	24.667	0.526027	-0.92679	0.000809722	0.00420327	Potri.003G079800
Potra155151g26757	355.773	466.223	245.323	0.526192	-0.926338	1.98394e-11	3.81879e-10	Potri.019G078400
Potra003850g23150	1041.52	1364.64	718.391	0.526432	-0.925682	7.34599e-12	1.48647e-10	Potri.006G062800
Potra000470g02835	68.0303	89.1151	46.9456	0.526798	-0.924678	2.61087e-06	2.33634e-05	Potri.011G137100
Potra000446g02496	24.4438	32.0112	16.8764	0.527202	-0.923573	0.0031204	0.0137469	Potri.001G309100
Potra001956g15444	23.7182	31.0595	16.3768	0.527272	-0.92338	0.00475612	0.0197689	Potri.019G033800
Potra001569g12976	175.987	230.451	121.522	0.527325	-0.923237	1.53181e-05	0.000118566	Potri.003G130100
Potra001016g08482	160.745	210.448	111.043	0.52765	-0.922346	1.06393e-09	1.63427e-08	Potri.002G074800
Potra003930g23588	104.389	136.665	72.1119	0.527653	-0.922337	3.88828e-07	4.06413e-06	Potri.010G093700
Potra000489g03064	42.2836	55.3511	29.2161	0.527833	-0.921846	0.000390405	0.00220394	Potri.009G021800
Potra000436g02375	93.9234	122.948	64.8991	0.527859	-0.921774	4.01218e-07	4.17636e-06	Potri.018G132000
Potra194336g28946	60.4518	79.1226	41.7811	0.528056	-0.921238	0.000380647	0.00215542	Potri.001G301400
Potra000424g02227	27.5342	36.0366	19.0318	0.528125	-0.921049	0.00565248	0.022919	Potri.010G052700
Potra001083g09362	348.422	455.843	241.002	0.528696	-0.919489	5.03299e-14	1.28026e-12	Potri.018G008200
Potra155715g26772	62.3281	81.5395	43.1167	0.528783	-0.919253	5.10427e-05	0.000355051	Potri.008G191800
Potra003987g24018	50.1954	65.6561	34.7346	0.529038	-0.918557	4.26022e-05	0.000301486	Potri.004G148300
Potra003295g21265	232.783	304.459	161.106	0.529157	-0.918232	3.65355e-11	6.81743e-10	Potri.015G012800
Potra003590g22102	87.4217	114.339	60.5042	0.529164	-0.918213	2.17015e-06	1.96845e-05	Potri.005G083300
Potra001230g10586	101.89	133.259	70.5209	0.5292	-0.918114	2.87821e-08	3.60788e-07	Potri.008G042100
Potra007457g25971	338.178	442.275	234.08	0.529263	-0.917944	9.41942e-13	2.09009e-11	Potri.003G018500
Potra003111g20761	33.6903	44.0568	23.3238	0.529404	-0.917559	0.000906383	0.00464906	Potri.019G047000
Potra001937g15342	4064.22	5313.83	2814.61	0.529676	-0.916818	5.04705e-22	2.59377e-20	Potri.007G107200
Potra003865g23230	56.2357	73.5258	38.9456	0.529686	-0.91679	2.03326e-05	0.0001532	Potri.007G020600
Potra001056g09039	43.7941	57.254	30.3341	0.529816	-0.916437	0.000233205	0.00138929	Potri.004G105600
Potra149531g26650	44.131	57.6862	30.5758	0.530037	-0.915835	0.00595737	0.0239665	Potri.004G089400
Potra161548g30990	191.641	250.503	132.78	0.530054	-0.915789	2.85484e-08	3.58021e-07	Potri.002G054700
Potra000756g05963	21.3631	27.9166	14.8096	0.530494	-0.914592	0.0111368	0.0406775	Potri.001G418800
Potra189842g28721	422.524	552.063	292.984	0.530708	-0.914009	2.86925e-12	6.02065e-11	Potri.005G202000
Potra004004g24117	60.2314	78.6973	41.7656	0.530712	-0.913999	3.32076e-05	0.000240435	Potri.007G070600
Potra000471g02841	298.843	390.45	207.237	0.530764	-0.913857	1.76001e-10	3.01129e-09	Potri.011G102500
Potra002088g16269	315.174	411.754	218.594	0.530884	-0.913531	2.14738e-11	4.11464e-10	Potri.003G061800
Potra002425g18423	28.992	37.8712	20.1128	0.531084	-0.912989	0.00166638	0.0079259	Potri.014G178000
Potra000354g01377	470.061	613.996	326.126	0.531154	-0.912799	2.8223e-11	5.33437e-10	Potri.019G101900
Potra001696g13859	144.539	188.786	100.293	0.531251	-0.912534	1.4405e-08	1.89184e-07	Potri.015G076200
Potra002205g33785	47.2349	61.693	32.7768	0.531289	-0.912431	0.00023842	0.00141641	Potri.017G012400
Potra000649g04998	131.285	171.468	91.1015	0.531302	-0.912396	1.20569e-08	1.60644e-07	Potri.008G016000
Potra003998g24070	154.295	201.495	107.095	0.531499	-0.91186	3.1047e-09	4.4935e-08	Potri.006G145100
Potra006293g25641	35.7722	46.711	24.8333	0.531636	-0.911488	0.00196348	0.0091626	Potri.002G028400
Potra005496g25416	680.11	888.045	472.175	0.531702	-0.911311	3.26308e-16	1.02978e-14	Potri.006G228800
Potra002929g20335	311.256	406.414	216.099	0.53172	-0.911261	1.96388e-07	2.14714e-06	Potri.007G089200
Potra003159g20870	31.0148	40.488	21.5417	0.532051	-0.910364	0.000572925	0.00309964	Potri.004G141400
Potra001291g11144	38.2589	49.9416	26.5762	0.532146	-0.910106	0.00087751	0.00451553	Potri.010G131800
Potra004003g24107	27.5255	35.9239	19.1271	0.532433	-0.909328	0.0129561	0.0462945	Potri.011G089500
Potra000864g06978	20.4391	26.6706	14.2075	0.532704	-0.908593	0.0115916	0.0421118	#N/A
Potra002576g19377	163.977	213.948	114.007	0.532873	-0.908137	4.30453e-10	6.95e-09	Potri.005G230800
Potra002089g16277	120.352	157.025	83.6795	0.532905	-0.908049	9.13536e-08	1.0539e-06	Potri.001G062700
Potra001401g11903	377.508	492.336	262.681	0.533542	-0.906328	4.21483e-11	7.81233e-10	Potri.011G052600
Potra000475g02878	28.1986	36.7693	19.6279	0.533811	-0.905598	0.00353929	0.015318	Potri.012G019700
Potra000936g07646	133.258	173.753	92.7634	0.533879	-0.905414	1.88154e-08	2.41798e-07	Potri.015G032500
Potra002497g18872	31.5561	41.1454	21.9667	0.533881	-0.905411	0.000898559	0.00461275	Potri.006G225200
Potra001895g15073	330.569	431.006	230.131	0.53394	-0.905251	9.19534e-11	1.62632e-09	Potri.012G062300
Potra000490g03095	80.6827	105.187	56.1786	0.534083	-0.904864	2.45565e-05	0.000181726	Potri.006G006000
Potra002340g17881	86.7915	113.131	60.4521	0.534354	-0.904131	1.07496e-06	1.03024e-05	Potri.014G070900
Potra000187g00763	659.938	860.212	459.664	0.534361	-0.904113	1.68491e-15	4.96246e-14	Potri.002G036200
Potra003219g21043	124.002	161.627	86.3776	0.534427	-0.903936	2.49628e-07	2.68904e-06	Potri.012G022300
Potra002237g17194	150.979	196.694	105.265	0.53517	-0.90193	1.33812e-06	1.26243e-05	Potri.014G095300
Potra004432g24918	566.28	737.726	394.833	0.535203	-0.901841	3.38844e-16	1.06813e-14	Potri.015G085700
Potra001422g12037	23.8277	31.0344	16.621	0.535566	-0.900863	0.00663495	0.0262593	Potri.001G376800
Potra002351g17944	170.241	221.68	118.803	0.535922	-0.899905	2.88792e-10	4.77082e-09	Potri.001G469600
Potra000915g07425	41.3585	53.8483	28.8686	0.53611	-0.8994	0.000405934	0.00228326	Potri.009G100400
Potra001272g10994	10442.8	13592.6	7293.02	0.536544	-0.898231	5.98144e-17	2.00848e-15	Potri.013G061800
Potra000993g08223	170.631	222.055	119.207	0.536837	-0.897445	9.90443e-09	1.33806e-07	Potri.006G041800
Potra000454g02585	220.336	286.691	153.982	0.5371	-0.896737	4.77717e-10	7.66858e-09	Potri.010G076700
Potra001603g13224	22.0039	28.6303	15.3776	0.53711	-0.896711	0.00289517	0.012875	Potri.003G174400
Potra158683g26822	21.1471	27.5095	14.7847	0.537437	-0.895831	0.0117588	0.0426636	Potri.003G212900
Potra000892g07209	89.1375	115.955	62.3203	0.537453	-0.895789	1.66576e-06	1.5448e-05	Potri.007G121800
Potra001522g12664	23.1984	30.1703	16.2265	0.53783	-0.894778	0.00913136	0.0343359	Potri.001G412000
Potra001232g10598	79.2915	103.12	55.4628	0.537846	-0.894736	3.63485e-05	0.000260665	Potri.005G020600
Potra001163g10104	47.3508	61.5803	33.1213	0.537856	-0.894708	4.27634e-05	0.000302414	Potri.013G130300
Potra001774g14449	70.6886	91.9259	49.4512	0.537946	-0.894466	0.000114631	0.000735879	Potri.002G124000
Potra001180g10223	147.394	191.659	103.128	0.53808	-0.894108	1.26226e-08	1.67676e-07	Potri.012G074700
Potra000666g05151	335.903	436.741	235.066	0.538226	-0.893715	1.04398e-13	2.56184e-12	Potri.003G159200
Potra004538g25043	31.4411	40.8763	22.006	0.538356	-0.893366	0.00232912	0.0106403	Potri.002G177500
Potra000536g03748	33.5198	43.5746	23.4651	0.538504	-0.892972	0.00274369	0.0123017	Potri.001G356400
Potra002056g16037	91.2947	118.672	63.9177	0.538609	-0.892689	7.56392e-06	6.21636e-05	Potri.010G091200
Potra001240g10648	74.4043	96.7092	52.0994	0.538722	-0.892387	4.339e-06	3.71763e-05	Potri.017G130000
Potra000189g00774	24.3102	31.5915	17.0288	0.539032	-0.891557	0.0100991	0.0374931	Potri.018G142100
Potra176251g27870	55.2208	71.7604	38.6812	0.539033	-0.891555	0.0010259	0.00517567	Potri.014G022600
Potra183763g28330	3127.12	4063.58	2190.65	0.539094	-0.89139	7.91861e-21	3.71894e-19	Potri.006G232900
Potra003255g21138	114.243	148.454	80.0324	0.539106	-0.891359	8.70737e-09	1.18556e-07	Potri.002G093300
Potra002993g20490	131.523	170.905	92.14	0.53913	-0.891296	1.38323e-08	1.82352e-07	Potri.010G189900
Potra001265g10942	79.7347	103.609	55.8608	0.539152	-0.891235	1.11748e-05	8.86425e-05	Potri.003G121900
Potra002153g16655	56.3407	73.1814	39.4999	0.539754	-0.889626	0.00142062	0.00689792	Potri.016G062500
Potra002374g18092	24.3032	31.5664	17.0399	0.539812	-0.88947	0.0110915	0.0405652	Potri.009G106200
Potra002552g19221	89.5882	116.349	62.8273	0.53999	-0.888996	1.6868e-05	0.000129267	Potri.004G061800
Potra000508g03315	26.7612	34.7533	18.769	0.540065	-0.888794	0.00683349	0.0269186	Potri.008G024100
Potra003966g23814	43.5715	56.578	30.565	0.540228	-0.88836	0.00339194	0.0147515	Potri.008G046800
Potra002493g18841	43.2277	56.1273	30.3281	0.540345	-0.888048	0.000250989	0.00148315	Potri.009G045400
Potra002267g17389	133.161	172.877	93.4447	0.540528	-0.88756	1.13262e-07	1.28406e-06	Potri.016G048600
Potra000536g03755	2835.9	3681.72	1990.08	0.540529	-0.887555	3.23112e-20	1.43277e-18	Potri.001G355600
Potra000188g00770	29.7643	38.635	20.8936	0.540795	-0.886847	0.00754539	0.0292831	Potri.005G002200
Potra172726g27602	480.257	623.347	337.167	0.540899	-0.88657	1.59258e-05	0.000122893	Potri.006G105100
Potra002276g17450	175.672	228.01	123.335	0.540921	-0.886511	1.21302e-07	1.37096e-06	Potri.010G219600
Potra000294g01074	44.4255	57.6487	31.2023	0.54125	-0.885633	0.000307896	0.00178046	Potri.014G134900
Potra006358g25664	121.362	157.432	85.2915	0.541767	-0.884256	8.14093e-06	6.64931e-05	Potri.005G141800
Potra003849g23146	43.042	55.8269	30.2571	0.54198	-0.883689	0.000369129	0.00209532	Potri.001G381700
Potra004493g24986	1189.54	1542.71	836.38	0.54215	-0.883235	1.72536e-19	7.10878e-18	Potri.003G059200
Potra000783g06176	52.732	68.3858	37.0783	0.542193	-0.883123	8.30129e-05	0.000551627	Potri.010G211400
Potra002348g17928	47.0575	61.0232	33.0917	0.542281	-0.882888	0.000610568	0.00327272	Potri.012G055500
Potra003828g23019	186.638	242.002	131.275	0.542452	-0.882431	1.31855e-09	1.99238e-08	Potri.008G057400
Potra003808g22934	481.735	624.624	338.846	0.54248	-0.882357	2.41572e-05	0.000179248	Potri.018G030200
Potra001246g10693	74.9176	97.135	52.7001	0.542545	-0.882185	6.77274e-06	5.60925e-05	Potri.010G180200
Potra002386g18174	118.372	153.462	83.2819	0.542686	-0.88181	3.1484e-07	3.34358e-06	Potri.014G074400
Potra177346g27949	27.8327	36.0806	19.5848	0.542806	-0.881492	0.00821868	0.03147	Potri.005G122100
Potra001259g10862	277.569	359.809	195.329	0.542869	-0.881324	4.18894e-11	7.7747e-10	Potri.005G108900
Potra003179g20910	428.882	555.845	301.92	0.543173	-0.880518	6.23046e-14	1.5705e-12	Potri.001G274900
Potra002151g16640	37.9275	49.153	26.7019	0.54324	-0.880338	0.000243057	0.00144149	Potri.016G053800
Potra001525g12683	668.559	866.413	470.705	0.543281	-0.88023	6.38542e-09	8.90786e-08	Potri.003G094500
Potra008535g26179	569.726	738.296	401.157	0.543356	-0.880031	1.89041e-15	5.5442e-14	Potri.019G087000
Potra001115g09804	171.163	221.805	120.52	0.54336	-0.880019	4.85643e-09	6.88895e-08	Potri.004G013900
Potra166535g27222	31.9622	41.4081	22.5162	0.543764	-0.878946	0.00748661	0.0291078	Potri.003G101200
Potra169691g27460	79.8518	103.446	56.2578	0.543839	-0.878748	5.48504e-06	4.60498e-05	Potri.001G273000
Potra002376g18106	508.155	658.176	358.133	0.544129	-0.877979	1.88781e-15	5.54242e-14	Potri.009G070400
Potra003795g22883	36.9439	47.8505	26.0374	0.544141	-0.877949	0.000523922	0.00286181	Potri.014G146100
Potra001484g12392	101.354	131.237	71.4706	0.544593	-0.87675	1.76932e-06	1.63213e-05	Potri.017G077300
Potra001274g11010	80.2055	103.797	56.6145	0.545436	-0.874517	5.65257e-06	4.73796e-05	Potri.006G033200
Potra001941g15356	102.426	132.533	72.3181	0.54566	-0.873926	6.3864e-07	6.37333e-06	Potri.007G096800
Potra001869g14938	74.982	97.0222	52.9418	0.545667	-0.873906	5.18151e-05	0.000359884	Potri.009G160900
Potra001309g11247	534.643	691.571	377.715	0.546169	-0.872581	1.25739e-15	3.7631e-14	Potri.004G217700
Potra001413g11984	132.401	171.256	93.5462	0.546237	-0.872401	1.31256e-08	1.73943e-07	Potri.002G027300
Potra004029g24344	153.915	199.078	108.751	0.546275	-0.8723	3.02539e-08	3.78215e-07	Potri.006G116000
Potra000059g34983	37.7715	48.8523	26.6908	0.546357	-0.872084	0.00436807	0.0183729	Potri.005G067800
Potra003798g22893	47.6088	61.5678	33.6498	0.546549	-0.871578	0.000279095	0.00163121	Potri.014G167400
Potra000671g05203	82.5687	106.776	58.3612	0.546575	-0.871509	5.01997e-06	4.24742e-05	Potri.004G152800
Potra000593g04497	45.2921	58.5692	32.0151	0.54662	-0.871391	0.000183843	0.00112809	Potri.002G185300
Potra000499g03195	9859.35	12749.3	6969.44	0.546654	-0.871301	5.05918e-14	1.28574e-12	Potri.013G004100
Potra000605g04599	54.1756	70.0136	38.3376	0.547573	-0.868876	0.000185306	0.00113607	Potri.013G040900
Potra001735g14131	106.166	137.198	75.1346	0.547638	-0.868706	5.94568e-07	5.98507e-06	Potri.010G062700
Potra001948g15398	684.201	884.108	484.295	0.547778	-0.868337	6.75771e-17	2.25281e-15	Potri.013G158800
Potra001732g14093	218.238	281.989	154.486	0.547844	-0.868162	1.59458e-10	2.74514e-09	Potri.017G044700
Potra001507g12576	18.2094	23.5278	12.891	0.547905	-0.868003	0.0138026	0.0486715	Potri.002G151200
Potra001065g09153	535.722	692.179	379.265	0.547929	-0.867939	6.64218e-15	1.84672e-13	Potri.006G102100
Potra004115g24527	450.713	582.214	319.213	0.548274	-0.867031	3.54161e-14	9.18539e-13	Potri.003G087800
Potra000556g04030	236.373	305.336	167.41	0.548281	-0.867012	1.36901e-10	2.38338e-09	Potri.006G112400
Potra002124g16470	111.463	143.978	78.9472	0.548329	-0.866886	3.90261e-07	4.07604e-06	Potri.003G037000
Potra192956g28843	36.4409	47.0679	25.8139	0.548439	-0.866597	0.00104871	0.00527638	Potri.002G120200
Potra003186g20937	1194.28	1542.42	846.145	0.548584	-0.866216	4.35544e-18	1.61675e-16	Potri.005G089200
Potra001917g15224	53.9208	69.6065	38.2351	0.549303	-0.864325	0.000103629	0.000671924	Potri.002G004500
Potra002796g32018	28.9446	37.3639	20.5253	0.549336	-0.86424	0.00749577	0.0291272	Potri.013G093200
Potra002658g19679	47.4959	61.3109	33.6808	0.549345	-0.864217	0.000285569	0.00166555	Potri.014G170300
Potra000589g04444	40.5999	52.4083	28.7915	0.549369	-0.864153	0.000481731	0.00265587	Potri.018G003000
Potra000723g05653	76.5378	98.7755	54.3001	0.549732	-0.863199	1.36611e-05	0.000106691	Potri.001G121300
Potra003883g23321	125.276	161.67	88.8818	0.549772	-0.863096	1.31064e-07	1.46816e-06	Potri.009G061500
Potra000532g03707	156.326	201.739	110.912	0.549778	-0.863078	7.54015e-05	0.000505641	Potri.013G008200
Potra000460g02668	59.7751	77.1385	42.4116	0.549811	-0.862992	0.000104032	0.000674217	Potri.002G216900
Potra000577g04307	132.957	171.575	94.3396	0.549844	-0.862907	1.55186e-06	1.44932e-05	Potri.009G024600
Potra001280g11049	525.789	678.256	373.321	0.550413	-0.861414	1.98473e-11	3.81879e-10	Potri.010G003100
Potra002387g18179	18.3752	23.703	13.0473	0.550449	-0.86132	0.0125876	0.0452454	Potri.005G232200
Potra001899g15087	147.796	190.645	104.948	0.550487	-0.86122	1.64679e-08	2.14152e-07	Potri.006G067700
Potra002906g20277	21.0471	27.1464	14.9478	0.550637	-0.860827	0.00917428	0.0344786	Potri.014G103300
Potra000792g06272	357.18	460.67	253.689	0.550697	-0.860669	4.43222e-12	9.16883e-11	Potri.006G210500
Potra003275g21200	95.8709	123.643	68.0989	0.550771	-0.860475	8.61269e-06	7.00171e-05	Potri.001G010500
Potra001443g12127	214.521	276.661	152.38	0.550783	-0.860444	3.34096e-10	5.46084e-09	Potri.014G118500
Potra001567g12957	27.2212	35.104	19.3385	0.55089	-0.860163	0.00447883	0.0187779	Potri.004G207400
Potra001989g15645	79.7647	102.858	56.6717	0.550972	-0.85995	3.92383e-06	3.39329e-05	Potri.010G168100
Potra000621g04718	376.098	484.974	267.221	0.551	-0.859875	4.95206e-13	1.13225e-11	Potri.002G064000
Potra002539g19125	666.83	859.797	473.863	0.551134	-0.859526	3.75685e-15	1.0713e-13	Potri.004G087300
Potra002135g16536	34.4958	44.4762	24.5154	0.551203	-0.859345	0.00192601	0.00900588	Potri.018G045500
Potra000544g03848	52.9342	68.248	37.6205	0.551232	-0.859268	0.000181874	0.00111724	Potri.002G046800
Potra002003g15717	543.248	700.381	386.116	0.551294	-0.859106	3.88081e-14	1.00091e-12	Potri.011G011100
Potra000706g05510	58.9178	75.955	41.8806	0.551387	-0.858862	7.40706e-05	0.000497677	Potri.004G183900
Potra000586g04376	43.4604	56.0273	30.8936	0.551402	-0.858824	0.000321159	0.00184525	Potri.006G027000
Potra000352g01302	84.9924	109.569	60.4163	0.551402	-0.858823	9.00529e-06	7.28712e-05	Potri.014G042000
Potra003239g21098	79.0573	101.912	56.2027	0.551484	-0.85861	2.64905e-05	0.000195051	Potri.019G024200
Potra174689g27745	664.824	856.949	472.699	0.551606	-0.858289	5.01604e-16	1.55997e-14	Potri.014G185300
Potra002063g16080	554.173	714.23	394.117	0.551808	-0.857762	3.3456e-15	9.58946e-14	Potri.008G040700
Potra001953g15429	713.888	920.018	507.758	0.551901	-0.857519	9.51738e-14	2.35001e-12	Potri.018G058600
Potra186774g28456	140.668	181.254	100.082	0.552167	-0.856824	1.79384e-08	2.31327e-07	Potri.018G023300
Potra163547g34958	217.074	279.697	154.45	0.552206	-0.856722	1.83327e-09	2.71263e-08	Potri.006G219200
Potra162249g27002	497.235	640.565	353.905	0.55249	-0.85598	2.62446e-07	2.82274e-06	Potri.001G088800
Potra154203g26742	31.2714	40.2813	22.2614	0.552648	-0.855567	0.00481365	0.0199752	#N/A
Potra001768g14371	160.48	206.716	114.244	0.552659	-0.85554	2.7719e-07	2.97098e-06	#N/A
Potra000551g03961	95.6804	123.242	68.1188	0.552725	-0.855367	0.0105192	0.0387783	Potri.014G094200
Potra002204g16970	22.5787	29.0813	16.0762	0.5528	-0.85517	0.00949989	0.0355581	Potri.001G366700
Potra000808g06430	208.792	268.885	148.699	0.553019	-0.854598	1.90407e-09	2.80991e-08	Potri.008G036700
Potra004311g24802	86.7892	111.76	61.8186	0.553137	-0.854291	1.30014e-05	0.000101968	Potri.015G019100
Potra002594g19501	3112.04	4007.39	2216.7	0.553152	-0.854253	3.82739e-19	1.55121e-17	Potri.016G051500
Potra003348g21413	1099.61	1415.94	783.275	0.553185	-0.854166	5.69623e-18	2.09211e-16	Potri.T115200
[truncated: 4,196 more rows]

## Sheet: S2
S2: Gene list of DRGs identified in TW compared to NW in pLMX5::etr1-1 trees.
DRGs (pAdj<0.05; log2FC<0.5>) in LMX5::etr1-1(Nw vs. TW)
id	baseMean	baseMeanA	baseMeanB	foldChange	log2FoldChange	pval	padj
Potra000526g03613	28.9284	56.8736	0.983178	0.0172871	-5.85416	6.41e-22	8.12e-20
Potra001790g14530	44.7969	87.999	1.59471	0.0181219	-5.78612	4.92e-08	1.26e-06
Potra000187g00757	28.0612	55.0272	1.09524	0.0199035	-5.65083	2.34e-06	4.34e-05
Potra009826g26439	11.0567	21.5177	0.595757	0.0276868	-5.17466	9.5e-08	2.29e-06
Potra001200g30653	8.87869	17.2579	0.499478	0.028942	-5.11069	0.000736017	0.00668225
Potra000792g06278	28.8564	55.9254	1.78727	0.0319581	-4.96767	2.57e-20	2.83e-18
Potra003283g21229	8.13901	15.6823	0.595757	0.0379892	-4.71827	0.00178401	0.0140958
Potra003644g22268	47.2684	91.0231	3.51373	0.0386026	-4.69516	4.93e-19	4.97e-17
Potra199575g29414	6.41481	12.3459	0.483699	0.0391789	-4.67378	0.000111734	0.00133087
Potra000633g04834	12.496	24.0087	0.983178	0.0409508	-4.60996	2.19e-07	5e-06
Potra195780g29065	12.3508	23.7026	0.998957	0.0421454	-4.56848	4.78e-09	1.44e-07
Potra001741g14196	5.68478	10.8859	0.483699	0.0444337	-4.4922	0.000247158	0.00266352
Potra004022g24317	113.394	216.62	10.168	0.0469392	-4.41306	3.09e-14	1.81e-12
Potra000475g02877	5.38646	10.2734	0.499478	0.0486184	-4.36235	0.000428045	0.00425386
Potra002148g16617	5.06943	9.65516	0.483699	0.0500975	-4.31912	0.000472103	0.0046224
Potra161556g34094	4.98319	9.48268	0.483699	0.0510087	-4.29311	0.000618745	0.00580302
Potra001784g14503	22.1995	42.24	2.15891	0.0511106	-4.29023	6.64e-05	0.000846372
Potra197674g29244	69.6178	131.709	7.52694	0.0571484	-4.12914	1.48e-28	3e-26
Potra002676g19724	9.91305	18.7467	1.07946	0.0575813	-4.11826	4.75e-06	8.24e-05
Potra000033g00173	4.50264	8.5058	0.499478	0.0587221	-4.08995	0.00347354	0.0244412
Potra000602g04572	8.65937	16.3513	0.967399	0.0591633	-4.07915	1.04e-05	0.000166067
Potra002581g19409	5.25992	9.92408	0.595757	0.0600315	-4.05814	0.000663407	0.00613333
Potra198814g29359	8.66026	16.3373	0.983178	0.0601798	-4.05458	0.00348836	0.0244983
Potra001967g15523	4.20628	7.91309	0.499478	0.0631206	-3.98575	0.00169122	0.0134352
Potra006534g25705	3.78073	7.07777	0.483699	0.0683406	-3.87111	0.00468557	0.0311409
Potra001609g13264	219.687	410.661	28.7136	0.0699204	-3.83814	9.02e-37	3.06e-34
Potra002434g18471	3.81863	7.13778	0.499478	0.0699767	-3.83698	0.00516644	0.033562
Potra004172g24656	3.67149	6.85927	0.483699	0.0705176	-3.82587	0.00640927	0.0397789
Potra010177g26513	49.2836	91.8797	6.68738	0.0727841	-3.78023	6.57e-12	2.96e-10
Potra003842g23089	14.8146	27.5824	2.04685	0.0742088	-3.75227	0.000549004	0.00524436
Potra161949g26981	197.983	367.67	28.2969	0.0769628	-3.69969	7.14e-33	1.95e-30
Potra003736g22630	27.8235	51.6338	4.01321	0.0777245	-3.68549	1.53e-05	0.000232322
Potra166111g27214	14.7503	27.3418	2.15891	0.0789603	-3.66273	1.26e-08	3.56e-07
Potra000430g02276	17.5395	32.5011	2.57789	0.079317	-3.65623	7.32e-06	0.000121944
Potra001926g15273	94.9415	175.864	14.0195	0.0797178	-3.64895	2.52e-09	7.88e-08
Potra004030g24345	24.5213	45.289	3.75363	0.0828816	-3.5928	1e-12	4.97e-11
Potra000869g33442	6.06284	11.1583	0.967399	0.0866977	-3.52786	0.000573484	0.00544086
Potra000449g02531	41.7364	76.6576	6.81522	0.0889047	-3.4916	2.8e-06	5.12e-05
Potra004507g25006	85.8035	157.251	14.3556	0.091291	-3.45338	6.5e-20	6.9e-18
Potra001342g11490	9.69883	17.7067	1.69099	0.0955003	-3.38835	1.06e-05	0.000168208
Potra000551g03971	78.7842	143.706	13.8624	0.0964634	-3.37387	9.27e-12	4.06e-10
Potra001320g11329	8.24344	15.0358	1.4511	0.0965097	-3.37318	4.03e-05	0.000544255
Potra002412g18358	2602.9	4745.82	459.977	0.0969224	-3.36703	1.18e-22	1.62e-20
Potra001655g13591	955.082	1735.45	174.719	0.100677	-3.3122	0.000259275	0.0027737
Potra001777g14467	16.6024	30.159	3.04581	0.100992	-3.30769	9.47e-09	2.73e-07
Potra001118g09878	289.425	525.271	53.5795	0.102004	-3.29331	8.4e-10	2.81e-08
Potra001089g09466	22.3463	40.4395	4.2531	0.105172	-3.24918	1.33e-05	0.000205232
Potra000440g02419	19.0254	34.3934	3.65735	0.106339	-3.23326	7.39e-09	2.17e-07
Potra003422g32179	5.08668	9.19018	0.983178	0.106981	-3.22457	0.00623797	0.0389349
Potra002228g17115	364.464	657.854	71.075	0.108041	-3.21035	2.96e-56	2.5e-53
Potra003079g20688	19.6356	35.4056	3.86568	0.109183	-3.19518	7.04e-08	1.74e-06
Potra000156g00559	5.56267	10.0301	1.09524	0.109195	-3.19502	0.00152483	0.0123244
Potra170901g31146	5.93874	10.686	1.19151	0.111503	-3.16485	0.00564229	0.0360309
Potra000365g01473	42.1482	75.7902	8.50621	0.112234	-3.15542	1.73e-07	4.02e-06
Potra003968g23830	10.1069	18.167	2.04685	0.112669	-3.14984	4.91e-05	0.000645358
Potra001033g08671	10.2381	18.3979	2.07841	0.11297	-3.14598	5.61e-05	0.000728617
Potra001421g12029	57.0256	102.432	11.619	0.113432	-3.1401	0.000213323	0.00234613
Potra001843g14799	7.63762	13.7121	1.56316	0.113998	-3.13292	0.00041661	0.00415655
Potra003005g20514	14.2958	25.642	2.94953	0.115027	-3.11995	1.5e-05	0.000228669
Potra160621g26872	25.0824	44.96	5.20472	0.115763	-3.11075	6.36e-11	2.48e-09
Potra004957g34453	5.22444	9.35365	1.09524	0.117092	-3.09429	0.00155136	0.012517
Potra009454g26363	4.60754	8.23191	0.983178	0.119435	-3.0657	0.00588106	0.0371727
Potra002410g18334	15.2987	27.3276	3.26993	0.119657	-3.06303	4.12e-07	8.93e-06
Potra001342g30760	14.5692	25.9001	3.23837	0.125033	-2.99962	3.16e-06	5.7e-05
Potra000167g00628	7.57888	13.4668	1.69099	0.125568	-2.99346	0.00516603	0.033562
Potra001967g34311	4.38812	7.79307	0.983178	0.126161	-2.98667	0.00756772	0.0452244
Potra002063g16085	12.1317	21.5087	2.75467	0.128072	-2.96497	3.66e-06	6.52e-05
Potra179677g28038	54.4979	96.5861	12.4097	0.128483	-2.96035	1.26e-20	1.44e-18
Potra001707g13908	15.9411	28.2249	3.65735	0.129579	-2.9481	1.8e-07	4.18e-06
Potra002279g17468	436.295	772.359	100.23	0.129771	-2.94595	8.25e-12	3.64e-10
Potra003243g21117	8.88139	15.7159	2.04685	0.130241	-2.94075	0.000126564	0.00148239
Potra169402g27438	6.84398	12.109	1.57893	0.130393	-2.93906	0.00116979	0.00987629
Potra151473g26686	5.09247	8.99342	1.19151	0.132487	-2.91607	0.00248061	0.0184973
Potra010284g26551	27.1529	47.9253	6.38046	0.133133	-2.90906	6.14e-10	2.11e-08
Potra007506g25981	181.291	319.837	42.7456	0.133648	-2.90349	0.000206393	0.00228163
Potra002187g16844	4.51889	7.94254	1.09524	0.137895	-2.85836	0.00635578	0.0395263
Potra002232g17150	37.3007	65.3676	9.23371	0.141258	-2.82359	9.97e-07	2.01e-05
Potra000787g33349	12.2478	21.4498	3.04581	0.141997	-2.81606	8.17e-05	0.00101259
Potra169381g31122	17.0236	29.8098	4.23733	0.142146	-2.81456	3.49e-07	7.68e-06
Potra003887g23344	135.87	237.758	33.983	0.142931	-2.80661	6.78e-39	2.59e-36
Potra000552g03983	5.83316	10.1994	1.46688	0.143819	-2.79767	0.00475408	0.0315157
Potra002311g17635	28.044	48.9997	7.08827	0.14466	-2.78927	6.29e-10	2.15e-08
Potra001199g10361	14.7063	25.6906	3.72207	0.14488	-2.78706	6.32e-06	0.000106961
Potra000395g01825	152.712	266.656	38.7672	0.145382	-2.78207	1.65e-05	0.000247681
Potra001819g14682	122.706	214.088	31.3246	0.146317	-2.77283	6.27e-25	1e-22
Potra003625g22203	185.854	324.079	47.6299	0.14697	-2.7664	3.27e-19	3.34e-17
Potra001741g14195	449.307	781.194	117.419	0.150308	-2.73401	6.01e-25	9.66e-23
Potra000436g32630	6.02467	10.4704	1.57893	0.1508	-2.72929	0.00308548	0.0221897
Potra001227g10560	10.9805	19.0588	2.9022	0.152276	-2.71524	0.00609129	0.0382661
Potra001458g12261	29.1204	50.474	7.76684	0.153878	-2.70014	4.85e-11	1.92e-09
Potra000997g08284	57.0279	98.8449	15.211	0.153887	-2.70005	8.65e-09	2.52e-07
Potra000440g02417	19.2081	33.2762	5.14	0.154465	-2.69465	2.12e-07	4.86e-06
Potra001094g09525	62.3021	107.926	16.6779	0.15453	-2.69404	3.2e-05	0.000443902
Potra176308g27875	22.3545	38.7136	5.99535	0.154864	-2.69092	1.32e-05	0.000204684
Potra001923g15251	22.5306	39.0011	6.06007	0.155382	-2.68611	0.00290762	0.0211654
Potra001493g12460	172.485	298.465	46.5047	0.155813	-2.68211	2.02e-29	4.45e-27
Potra002838g20091	9.4111	16.2759	2.54633	0.156448	-2.67624	0.000187503	0.00210118
Potra000571g04219	32.5087	56.1868	8.83051	0.157163	-2.66966	9.75e-12	4.25e-10
Potra001206g10421	25.9883	44.8861	7.09058	0.157968	-2.66229	0.00061596	0.00577886
Potra000220g00906	30.2173	52.1683	8.26632	0.158455	-2.65786	2.6e-10	9.32e-09
Potra003397g21551	441.282	761.589	120.975	0.158845	-2.65431	0.000261651	0.00279179
Potra007792g26029	398.183	687.119	109.246	0.158992	-2.65298	5.11e-16	3.69e-14
Potra004017g24249	160.903	277.414	44.3909	0.160016	-2.64371	1.58e-17	1.36e-15
Potra005494g25415	39.4671	67.9938	10.9405	0.160904	-2.63573	3.15e-08	8.34e-07
Potra002456g18616	14.2312	24.5138	3.94849	0.161072	-2.63422	8.11e-05	0.00100561
Potra000525g03578	251.773	433.69	69.8565	0.161075	-2.6342	9.18e-13	4.59e-11
Potra010212g26525	18.0587	31.0917	5.02564	0.161639	-2.62915	8.32e-07	1.7e-05
Potra001493g12462	14.4182	24.8233	4.01321	0.161671	-2.62886	2.35e-05	0.000338645
Potra002758g19915	3207.87	5520.48	895.256	0.16217	-2.62442	1.73e-60	1.66e-57
Potra000466g02778	25.9805	44.5817	7.37942	0.165526	-2.59487	0.00293807	0.0213424
Potra002232g17149	157.909	270.91	44.9084	0.165769	-2.59276	7.64e-39	2.84e-36
Potra000980g08109	36.5425	62.6913	10.3937	0.165791	-2.59256	2.48e-12	1.17e-10
Potra001612g13285	378.69	648.472	108.908	0.167945	-2.57394	7.9e-14	4.42e-12
Potra000680g05272	9.23343	15.7927	2.67417	0.16933	-2.56209	0.0021125	0.0161682
Potra000627g04787	41.0289	70.1183	11.9394	0.170276	-2.55406	5.94e-08	1.49e-06
Potra000802g06352	15.9931	27.3298	4.6563	0.170375	-2.55322	9.62e-06	0.000155272
Potra002104g16364	21.3689	36.5025	6.23524	0.170817	-2.54948	9.14e-06	0.000148412
Potra000502g03245	8.7783	14.9787	2.57789	0.172104	-2.53865	0.000626888	0.00586163
Potra001556g12882	5.04651	8.61036	1.48266	0.172194	-2.53789	0.00788172	0.0467395
Potra000991g08214	10.6167	18.107	3.12631	0.172657	-2.53402	4.66e-05	0.000617538
Potra000757g05971	297.956	507.922	87.9902	0.173236	-2.52919	1.84e-49	1.22e-46
Potra199816g29441	3822	6513.23	1130.77	0.173612	-2.52606	1.92e-13	1.03e-11
Potra002247g17258	64.3678	109.592	19.1437	0.174681	-2.5172	4.37e-08	1.13e-06
Potra000997g08286	38.7062	65.8722	11.5402	0.17519	-2.51301	0.00532059	0.0343231
Potra009289g26325	10.4643	17.8022	3.12631	0.175614	-2.50952	6.86e-05	0.000869294
Potra000544g03840	8.54805	14.534	2.56211	0.176284	-2.50403	0.00110648	0.00940493
Potra001760g14315	455.681	773.931	137.43	0.177574	-2.4935	1.8e-08	4.94e-07
Potra001488g12419	23.7104	40.2497	7.17108	0.178165	-2.48871	1.72e-08	4.72e-07
Potra199698g29428	220.361	373.928	66.7933	0.178626	-2.48498	3.09e-19	3.16e-17
Potra002279g17473	19.8182	33.6096	6.0269	0.179321	-2.47938	1.23e-05	0.000191687
Potra001958g15467	361.289	612.215	110.364	0.180269	-2.47177	1.64e-53	1.27e-50
Potra000927g07548	18.78	31.7595	5.80048	0.182638	-2.45294	9.44e-07	1.91e-05
Potra001620g13327	48.7451	82.4245	15.0658	0.182783	-2.4518	3.34e-14	1.95e-12
Potra189637g28707	232.805	393.615	71.9941	0.182905	-2.45083	1.06e-09	3.51e-08
Potra000439g35484	12.4797	21.0938	3.86568	0.183262	-2.44802	0.00517295	0.0335964
Potra002292g17538	34.4837	58.1862	10.7811	0.185286	-2.43217	1.96e-09	6.2e-08
Potra169811g27472	52.5617	88.687	16.4364	0.18533	-2.43183	3.33e-15	2.2e-13
Potra002984g20461	3821.29	6425.64	1216.93	0.189387	-2.40059	4.35e-27	8.19e-25
Potra000927g07531	47.261	79.3891	15.1328	0.190615	-2.39126	0.00119393	0.0100345
Potra001016g08474	100.408	168.574	32.2415	0.19126	-2.38639	3.41e-22	4.41e-20
Potra000354g01350	12.3911	20.7847	3.99743	0.192325	-2.37838	0.000322249	0.00333214
Potra000803g06364	880.253	1475.83	284.681	0.192896	-2.3741	2.43e-61	2.61e-58
Potra000573g04262	14.2291	23.8335	4.62475	0.194044	-2.36554	1.37e-05	0.00021071
Potra002586g19438	29.4047	49.2198	9.58958	0.194832	-2.3597	9.24e-08	2.24e-06
Potra004041g24369	106.707	178.528	34.8857	0.195408	-2.35544	0.00102496	0.00881943
Potra178904g27979	5.94682	9.94305	1.95058	0.196175	-2.34979	0.00787764	0.0467253
Potra002920g20310	70.2439	117.427	23.0606	0.196382	-2.34826	1.04e-11	4.52e-10
Potra002041g15958	10.6749	17.8361	3.51373	0.197001	-2.34372	0.00104409	0.00895082
Potra003038g20591	37.3146	62.3339	12.2953	0.197249	-2.34191	1.6e-06	3.08e-05
Potra008641g26202	13.6875	22.8623	4.51269	0.197385	-2.34091	3.61e-05	0.000493496
Potra006337g25656	10.2034	17.0405	3.36621	0.197541	-2.33977	0.000140744	0.00163216
Potra000573g04253	18.4561	30.8049	6.1074	0.198261	-2.33453	0.00124687	0.0104103
Potra002277g17463	136.589	227.722	45.4561	0.199613	-2.32473	2.16e-09	6.83e-08
Potra002336g17857	36.6835	61.1349	12.2322	0.200085	-2.32131	5.35e-07	1.14e-05
Potra000532g03709	749.436	1248.92	249.953	0.200136	-2.32095	1.32e-05	0.000204684
Potra000247g00980	17.3828	28.9651	5.80048	0.200258	-2.32007	4.09e-06	7.21e-05
Potra002287g17521	150.808	251.215	50.4004	0.200626	-2.31742	0.000472986	0.00462528
Potra003883g23318	101.791	169.549	34.0327	0.200725	-2.31671	0.000220807	0.00241508
Potra001380g11778	16.6908	27.7894	5.59215	0.201233	-2.31306	0.000166481	0.00189326
Potra000182g00732	153.799	255.974	51.6235	0.201675	-2.3099	4.43e-08	1.14e-06
Potra003576g32273	9.33445	15.511	3.15787	0.203589	-2.29627	0.00240316	0.0180163
Potra000340g01171	63.3305	105.179	21.4817	0.204239	-2.29167	1.53e-10	5.62e-09
Potra000612g04649	10.443	17.3407	3.54529	0.204449	-2.29019	0.000458474	0.00451915
Potra003413g21587	82.1482	136.336	27.9607	0.205087	-2.28569	0.000121488	0.00143113
Potra001328g11412	6.62481	10.9786	2.27097	0.206854	-2.27332	0.00507429	0.0330791
Potra004222g24700	384.278	636.656	131.899	0.207175	-2.27108	2.12e-11	8.8e-10
Potra000682g05282	7.77254	12.8709	2.67417	0.207769	-2.26695	0.00106018	0.00905809
Potra000514g03401	185.117	306.507	63.7278	0.207917	-2.26592	3.48e-12	1.62e-10
Potra000982g08122	55.8578	92.4124	19.3031	0.20888	-2.25926	9.9e-15	6.18e-13
Potra000572g04250	7.68457	12.7107	2.65839	0.209145	-2.25742	0.00652508	0.0403717
Potra001436g12093	80.1149	132.373	27.8566	0.21044	-2.24852	0.000259786	0.00277703
Potra009091g33486	8.88297	14.6728	3.09315	0.210809	-2.24599	0.00115848	0.00979272
Potra002860g20170	8.96637	14.8064	3.12631	0.211146	-2.24369	0.00665303	0.0410084
Potra001069g09226	116.016	191.525	40.5078	0.211502	-2.24126	1.29e-05	0.000200678
Potra001645g13490	29.8534	49.2659	10.441	0.211932	-2.23833	2.85e-09	8.85e-08
Potra001095g09538	16.0011	26.3943	5.60792	0.212467	-2.23469	2.12e-05	0.000309611
Potra003155g20863	22.1297	36.4767	7.78262	0.213359	-2.22865	0.000223287	0.00244029
Potra001765g31236	102.79	169.405	36.1742	0.213537	-2.22744	5.25e-19	5.28e-17
Potra196736g29139	10.6532	17.5528	3.75363	0.213848	-2.22534	0.000361984	0.00368417
Potra000445g02484	17.0303	27.9847	6.07584	0.217113	-2.20348	3.27e-05	0.000452132
Potra001515g12629	10.4994	17.2452	3.75363	0.217662	-2.19984	0.000832997	0.00739149
Potra000523g03553	10.121	16.6004	3.64157	0.219367	-2.18858	0.000842136	0.0074436
Potra187831g28542	14.4041	23.6036	5.20472	0.220506	-2.18111	0.000137386	0.00159744
Potra000135g00456	18.5914	30.4638	6.71894	0.220555	-2.18079	7.41e-05	0.000928657
Potra000526g03618	182.377	298.539	66.2156	0.221799	-2.17267	1.17e-30	2.78e-28
Potra003652g22310	8.21679	13.3878	3.04581	0.227507	-2.13602	0.00118492	0.00996781
Potra002765g19933	11.164	18.1869	4.14105	0.227694	-2.13483	0.000579343	0.00549271
Potra001781g14489	8.28567	13.494	3.07737	0.228055	-2.13255	0.00490783	0.0322432
Potra009351g26341	13.962	22.735	5.18895	0.228236	-2.1314	0.00148716	0.0120796
Potra000571g33009	10.0058	16.2895	3.72207	0.228495	-2.12976	0.00134543	0.0111198
Potra001053g08992	12.6632	20.6054	4.72103	0.229116	-2.12585	0.000732708	0.00665872
Potra002588g19459	52.4988	85.128	19.8696	0.233408	-2.09907	1.01e-08	2.89e-07
Potra002122g16460	8475.87	13736.4	3215.38	0.234078	-2.09494	8.11e-61	8.07e-58
Potra000299g01090	1050.28	1701.66	398.891	0.234413	-2.09288	2.39e-71	4.44e-68
Potra183680g35307	116.037	187.878	44.196	0.235238	-2.08781	2.34e-18	2.17e-16
Potra002128g31653	12.2134	19.7705	4.6563	0.235518	-2.08609	0.00065072	0.0060358
Potra004020g32522	23.2938	37.694	8.89363	0.235943	-2.08349	3.76e-06	6.69e-05
Potra003469g21770	49.6731	80.3793	18.9669	0.235968	-2.08334	1.86e-11	7.79e-10
Potra000238g00947	9.72561	15.7292	3.72207	0.236635	-2.07927	0.00433444	0.0292229
Potra002765g19935	29.961	48.37	11.552	0.238826	-2.06597	2.95e-08	7.83e-07
Potra000373g01587	6.37572	10.2856	2.46583	0.239737	-2.06048	0.00614828	0.0385394
Potra000832g06669	37.7048	60.7944	14.6152	0.240404	-2.05647	7.17e-05	0.000905297
Potra000008g00037	14.4477	23.2874	5.60792	0.240814	-2.05401	0.000212132	0.0023358
Potra008024g26081	525.888	847.474	204.302	0.241072	-2.05247	8.46e-08	2.05e-06
Potra001542g12785	506.081	814.934	197.227	0.242016	-2.04682	1.12e-32	3.04e-30
Potra000661g05097	397.984	640.212	155.755	0.243287	-2.03927	3.72e-14	2.16e-12
Potra196068g29083	52.1053	83.7627	20.448	0.244118	-2.03435	7.53e-12	3.35e-10
Potra163736g27118	136.58	219.262	53.8983	0.245817	-2.02435	2.38e-12	1.13e-10
Potra001655g13592	188.467	302.468	74.4655	0.246193	-2.02214	0.000299384	0.0031306
Potra003275g21199	11.8465	19.0034	4.68947	0.246769	-2.01877	0.0013866	0.0114025
Potra001042g08819	195.106	312.914	77.2967	0.247022	-2.01729	1.32e-16	1.03e-14
Potra000464g02730	1517.23	2432.61	601.86	0.247413	-2.015	1.02e-10	3.83e-09
Potra000659g05079	46.8395	75.0679	18.611	0.247923	-2.01204	2.75e-11	1.13e-09
Potra001089g09468	229.364	367.473	91.2561	0.248334	-2.00964	1.26e-17	1.09e-15
Potra003586g22096	11.6233	18.6219	4.62475	0.24835	-2.00955	0.00218264	0.0166136
Potra000024g00118	41.9485	67.2049	16.692	0.248375	-2.00941	0.00284579	0.0207642
Potra003902g23429	59.5364	95.3257	23.7471	0.249116	-2.00511	1.36e-06	2.66e-05
Potra002551g19215	158.479	253.732	63.226	0.249184	-2.00472	2.05e-06	3.87e-05
Potra010386g26583	172.29	275.821	68.759	0.249288	-2.00411	2.75e-26	4.84e-24
Potra003816g22972	154.911	247.958	61.8632	0.249491	-2.00294	2.72e-11	1.12e-09
Potra000665g05146	90.8826	145.414	36.351	0.249982	-2.0001	5.75e-18	5.13e-16
Potra002400g18263	9.08225	14.5229	3.64157	0.250746	-1.9957	0.00400728	0.0274205
Potra001929g15287	12.6661	20.2395	5.09267	0.25162	-1.99068	0.000906318	0.00795264
Potra001428g12064	320.931	512.634	129.227	0.252085	-1.98802	2.84e-21	3.49e-19
Potra001453g12220	11.1221	17.7632	4.48113	0.252271	-1.98695	0.00851856	0.0497585
Potra002284g17495	116.91	186.656	47.1643	0.25268	-1.98462	7.48e-14	4.2e-12
Potra002935g20345	10.457	16.6924	4.22155	0.252902	-1.98335	0.00418108	0.0284072
Potra007728g26012	233.193	372.234	94.1528	0.25294	-1.98314	1.64e-18	1.55e-16
Potra002472g18709	4054.51	6469.38	1639.64	0.253446	-1.98025	7.03e-34	2.06e-31
Potra001753g14287	103.469	164.76	42.1791	0.256004	-1.96576	7.92e-06	0.000130276
Potra000177g00676	15.1605	24.1015	6.21946	0.258053	-1.95426	0.000180249	0.00203052
Potra001875g14977	33.609	53.3911	13.8269	0.258974	-1.94912	7.14e-08	1.76e-06
Potra001520g30885	10.5287	16.7237	4.3336	0.259129	-1.94826	0.00140489	0.0115359
Potra161135g26904	223.658	354.751	92.5659	0.260932	-1.93825	0.000246821	0.00266161
Potra001265g10922	594.576	942.999	246.153	0.261032	-1.9377	1.29e-11	5.52e-10
Potra000616g04688	29.9567	47.506	12.4074	0.261175	-1.93691	3.67e-07	8.04e-06
Potra003350g21416	26.2623	41.6473	10.8774	0.261178	-1.93689	0.000827023	0.00735261
Potra007918g26057	107.374	170.13	44.6173	0.262254	-1.93096	5.27e-18	4.74e-16
Potra002877g20209	2152.68	3410.15	895.221	0.262517	-1.92952	4.07e-65	5.66e-62
Potra000955g07838	445.133	704.983	185.283	0.26282	-1.92785	0.00123614	0.01033
Potra176450g27885	188.097	297.673	78.5221	0.263787	-1.92256	4.04e-12	1.86e-10
Potra003933g23606	9.213	14.5603	3.86568	0.265495	-1.91325	0.00622018	0.0388435
Potra000132g00443	20.8392	32.8969	8.78157	0.266942	-1.9054	0.00133862	0.01107
Potra000672g33169	8.47697	13.3771	3.57685	0.267386	-1.903	0.00847989	0.0495895
Potra180643g28115	101.073	159.443	42.7022	0.26782	-1.90066	5.76e-11	2.25e-09
Potra003601g22126	28.4853	44.9192	12.0515	0.268293	-1.89812	1.4e-06	2.73e-05
Potra003144g20842	1377.2	2171.38	583.014	0.2685	-1.89701	1.88e-08	5.12e-07
Potra002386g18172	897.987	1415.6	380.376	0.268703	-1.89591	1.36e-14	8.36e-13
Potra001449g12196	27.5675	43.4512	11.6838	0.268894	-1.89489	0.000166799	0.00189511
Potra002574g19365	101.049	159.21	42.8885	0.269383	-1.89227	1.53e-18	1.45e-16
Potra003980g23956	17.1938	27.0555	7.33208	0.271001	-1.88363	0.000156139	0.00179081
Potra000561g04064	189.648	298.385	80.9097	0.271159	-1.88279	0.000167265	0.00189808
Potra000019g00100	64.083	100.77	27.3965	0.271873	-1.87899	1.18e-11	5.09e-10
Potra000489g03068	79.067	124.246	33.8874	0.272744	-1.87438	1.05e-14	6.52e-13
Potra000582g04347	142.973	224.592	61.3543	0.273181	-1.87207	1.46e-22	1.98e-20
Potra001844g14801	773.716	1215.21	332.224	0.273389	-1.87097	3.59e-11	1.45e-09
Potra002499g18883	119.068	186.907	51.2281	0.274083	-1.86732	5.91e-07	1.25e-05
Potra001952g15416	34.8367	54.6077	15.0658	0.275891	-1.85783	7e-05	0.000886251
Potra003202g20988	132.931	208.243	57.6204	0.276698	-1.85361	1.44e-14	8.79e-13
Potra000611g04646	2671.23	4179.34	1163.13	0.278304	-1.84526	1.72e-47	1.04e-44
Potra001734g14122	50.4622	78.9155	22.0088	0.278891	-1.84223	1.33e-05	0.000205232
Potra003440g21667	101.334	158.465	44.2022	0.27894	-1.84197	0.000917869	0.00803907
Potra001740g14180	569.892	891.022	248.762	0.279187	-1.84069	1.06e-07	2.54e-06
Potra004009g24159	473.839	740.573	207.105	0.279654	-1.83828	7.22e-05	0.000909805
Potra186381g28436	176.533	275.643	77.423	0.280881	-1.83197	6.2e-07	1.3e-05
Potra152237g26704	228.74	357.037	100.443	0.281325	-1.82969	9.94e-13	4.93e-11
Potra002041g15949	164.134	256.117	72.1511	0.281712	-1.82771	0.000261913	0.00279227
Potra000353g32240	88.061	137.372	38.7505	0.282085	-1.8258	2.02e-08	5.48e-07
Potra000443g02456	155.297	242.199	68.3944	0.282389	-1.82425	3.39e-17	2.81e-15
Potra004001g24088	231.573	361.125	102.021	0.282508	-1.82363	8.7e-16	6.08e-14
Potra002108g16381	44.13	68.7777	19.4822	0.283263	-1.81979	5.75e-09	1.71e-07
Potra189617g28702	76.5999	119.346	33.8536	0.283659	-1.81777	8.85e-06	0.000144222
Potra009420g26351	220.584	343.647	97.5215	0.283784	-1.81714	3.49e-06	6.25e-05
Potra000927g07547	10.4239	16.2389	4.60897	0.283823	-1.81694	0.00485406	0.0320032
Potra164328g27166	23.551	36.6768	10.4252	0.284246	-1.81479	1.39e-05	0.00021331
Potra002559g19284	43.4659	67.6129	19.3189	0.285727	-1.80729	9.52e-09	2.74e-07
Potra001065g09170	69.6733	108.379	30.9672	0.285729	-1.80728	6.63e-11	2.57e-09
Potra182237g28213	310.842	483.404	138.281	0.286057	-1.80563	1.1e-33	3.16e-31
Potra000845g06813	15.8737	24.6725	7.0748	0.286748	-1.80214	0.004379	0.0294572
Potra003711g22519	11.9328	18.533	5.33256	0.287734	-1.79719	0.000962387	0.00837157
Potra000915g07420	9.43333	14.6293	4.23733	0.289646	-1.78764	0.00583408	0.0369421
Potra001507g12563	82.8029	128.388	37.2182	0.289889	-1.78643	6.49e-14	3.68e-12
Potra003647g22278	19.3238	29.9466	8.70107	0.290553	-1.78312	8.49e-05	0.0010465
Potra002313g17641	174.839	270.918	78.7604	0.290717	-1.78231	1.71e-12	8.27e-11
Potra007259g25924	74.3198	115.014	33.6255	0.292361	-1.77418	3.24e-07	7.19e-06
Potra002538g19121	21.4135	33.1292	9.69772	0.292724	-1.77238	0.00665034	0.0410026
Potra000072g00262	88.8558	137.458	40.2537	0.292844	-1.7718	2.76e-14	1.63e-12
Potra000508g03313	31.884	49.3003	14.4677	0.29346	-1.76876	6.32e-05	0.000807136
Potra000623g33074	36.4056	56.2809	16.5303	0.293711	-1.76753	2.49e-08	6.68e-07
Potra000855g33429	17.7443	27.4148	8.07376	0.294504	-1.76364	0.000429431	0.00426611
Potra001105g09664	79.7907	123.268	36.3132	0.294587	-1.76323	1.21e-13	6.62e-12
Potra002155g16663	51.5083	79.5252	23.4915	0.295397	-1.75927	1.63e-09	5.25e-08
Potra004568g25075	34.4555	53.169	15.742	0.296075	-1.75597	0.000701174	0.00642035
Potra001178g10216	2431.38	3751.41	1111.35	0.296247	-1.75513	6.19e-09	1.83e-07
Potra000678g05264	18.7846	28.9802	8.58902	0.296376	-1.7545	0.000462552	0.00455129
Potra001612g13284	31.9351	49.2565	14.6136	0.296684	-1.753	4.32e-06	7.57e-05
Potra000995g08248	236.426	364.567	108.284	0.297022	-1.75136	8.13e-17	6.44e-15
Potra001458g12260	48.1921	74.3106	22.0735	0.297044	-1.75125	2.73e-09	8.49e-08
Potra000739g05828	11.1445	17.1806	5.10845	0.297338	-1.74982	0.00505878	0.0330167
Potra000520g32907	13.5534	20.8873	6.21946	0.297763	-1.74776	0.00153577	0.012402
Potra000443g02453	15.8942	24.4896	7.29892	0.298042	-1.74641	0.00254983	0.0189475
Potra003906g23454	39.632	61.0246	18.2394	0.298886	-1.74233	7.29e-08	1.79e-06
Potra001325g11390	37.4756	57.6792	17.272	0.299449	-1.73962	4.07e-07	8.85e-06
Potra001259g10864	543.169	835.925	250.413	0.299564	-1.73907	4.97e-42	2.06e-39
Potra001164g10105	498.015	765.674	230.356	0.300853	-1.73287	1.35e-18	1.3e-16
Potra182478g28227	203.122	312.279	93.9657	0.300903	-1.73263	6.23e-13	3.17e-11
Potra001103g09637	24.2918	37.3227	11.2609	0.301717	-1.72873	2.27e-05	0.000328145
Potra194430g28953	36.9855	56.8229	17.1481	0.301781	-1.72843	1.58e-06	3.04e-05
Potra004014g32516	12.0133	18.4503	5.57637	0.302237	-1.72625	0.00205107	0.0157797
Potra196911g29170	309.779	475.74	143.818	0.302304	-1.72593	5.25e-22	6.73e-20
Potra002394g18207	12.0845	18.5453	5.6237	0.303242	-1.72146	0.00688394	0.0420406
Potra000433g02317	253.98	389.675	118.284	0.303546	-1.72001	1.93e-09	6.12e-08
Potra002051g16006	131.478	201.717	61.2384	0.303586	-1.71982	6.76e-13	3.43e-11
Potra001762g14340	14.4141	22.0935	6.73472	0.304828	-1.71393	0.00196729	0.0152806
Potra000494g32768	16.4508	25.2017	7.69981	0.305527	-1.71063	0.00567592	0.0362041
Potra001978g15586	477.734	731.595	223.873	0.306007	-1.70836	6.85e-27	1.28e-24
Potra000947g07755	8.24055	12.6154	3.86568	0.306426	-1.70639	0.00497954	0.0325898
Potra000625g04754	50.8301	77.8113	23.8489	0.306497	-1.70605	7.97e-06	0.000130878
Potra001281g11064	14.772	22.5971	6.94696	0.307427	-1.70168	0.00121669	0.0101889
Potra007207g34632	29.8256	45.6003	14.051	0.308135	-1.69837	0.00581222	0.0368792
Potra000669g05183	221.297	338.325	104.269	0.308191	-1.6981	1.51e-18	1.44e-16
Potra000190g00789	55.2894	84.5078	26.071	0.308504	-1.69664	4.43e-09	1.34e-07
Potra000784g06202	15.75	24.0535	7.44644	0.309579	-1.69162	0.00118957	0.0100008
Potra160899g26891	118.404	180.823	55.984	0.309606	-1.69149	1.18e-09	3.89e-08
Potra000526g03611	55.0548	83.9597	26.1499	0.311457	-1.68289	2.7e-09	8.42e-08
Potra001424g12047	80.6	122.864	38.3363	0.312023	-1.68028	7.11e-06	0.00011869
Potra000736g05800	31.1696	47.5133	14.8259	0.312036	-1.68022	2.39e-06	4.43e-05
Potra001713g13941	95.2874	145.246	45.329	0.312085	-1.67999	0.000640492	0.00595681
Potra002338g17867	2626.9	4002.45	1251.36	0.312649	-1.67739	1.63e-25	2.69e-23
Potra001056g09038	116.645	177.712	55.5775	0.312739	-1.67697	1.44e-14	8.79e-13
Potra171125g27572	179.355	273.167	85.5441	0.313157	-1.67504	3.24e-21	3.92e-19
Potra002057g16051	160.865	244.948	76.7815	0.31346	-1.67365	9.81e-19	9.68e-17
Potra002213g17041	29.1174	44.2801	13.9547	0.315147	-1.6659	2.07e-05	0.000302481
Potra001042g08799	391.754	595.465	188.042	0.315791	-1.66296	4.4e-19	4.45e-17
Potra172484g27595	141.076	214.414	67.7387	0.315925	-1.66235	3.27e-15	2.17e-13
Potra000858g06948	125.977	191.448	60.5068	0.316048	-1.66178	9.13e-16	6.36e-14
Potra002688g19756	296.17	449.587	142.753	0.317519	-1.65508	2.71e-24	4.1e-22
Potra000819g06527	41.7211	63.313	20.1292	0.317931	-1.65321	4.53e-06	7.9e-05
Potra002563g19308	17.3494	26.3203	8.37837	0.318323	-1.65144	0.000321793	0.0033299
Potra002535g19101	220.366	334.234	106.498	0.318633	-1.65003	7.8e-20	8.17e-18
Potra000527g03650	1580.76	2397.03	764.491	0.318932	-1.64868	5.13e-52	3.76e-49
Potra007462g25973	19.2416	29.1707	9.31261	0.319246	-1.64726	0.00066356	0.00613333
Potra001311g11262	30.7836	46.6624	14.9048	0.319417	-1.64649	0.00523536	0.0339305
Potra169457g27442	24.9951	37.8875	12.1027	0.319439	-1.64639	0.00279817	0.0205082
Potra002161g16699	304.374	461.31	147.438	0.319607	-1.64563	0.000103778	0.00124623
Potra007760g26019	6272	9502.29	3041.71	0.320103	-1.64339	6.59e-29	1.38e-26
Potra000710g05559	126.089	190.854	61.3251	0.32132	-1.63792	8.14e-11	3.1e-09
Potra000803g06379	25.7167	38.914	12.5194	0.32172	-1.63612	5.39e-05	0.000702047
Potra000626g04773	79.2384	119.789	38.6874	0.322961	-1.63057	2.06e-06	3.88e-05
Potra000672g05208	78.1806	118.165	38.1967	0.32325	-1.62928	1.37e-11	5.85e-10
Potra001422g12039	15.7453	23.7886	7.70212	0.323774	-1.62694	0.00155209	0.0125192
Potra001265g10935	16.5364	24.9832	8.08954	0.323799	-1.62683	0.00255686	0.0189895
Potra000409g01999	35.0874	52.9832	17.1915	0.324471	-1.62384	3e-06	5.44e-05
Potra001055g09029	103.405	156.024	50.7855	0.325499	-1.61928	7.1e-14	4e-12
Potra001342g11491	1283.15	1934.19	632.1	0.326803	-1.61351	1.87e-37	6.5e-35
Potra000282g01042	67.8465	102.239	33.4543	0.327217	-1.61168	7e-09	2.06e-07
Potra000771g06085	38.8013	58.4589	19.1437	0.327473	-1.61055	0.000167562	0.00190068
Potra002000g15699	19.5554	29.4582	9.65269	0.327674	-1.60967	0.00133642	0.0110585
Potra000508g03332	8139.66	12259.7	4019.66	0.327877	-1.60878	1.96e-32	5.24e-30
Potra001018g08495	241.1	363.027	119.174	0.328278	-1.60701	3.13e-10	1.11e-08
Potra199790g29440	15.6785	23.606	7.75106	0.328351	-1.60669	0.00103683	0.00889404
Potra001171g10147	15.8938	23.9244	7.86312	0.328665	-1.60531	0.000961369	0.00836794
Potra002133g16529	379.017	570.332	187.702	0.329111	-1.60336	8.24e-27	1.53e-24
Potra003791g22872	210.021	315.904	104.139	0.329653	-1.60098	6.84e-16	4.88e-14
Potra000548g03927	78.8638	118.609	39.1191	0.329817	-1.60026	0.00112553	0.00955189
Potra004042g24370	250.296	376.364	124.228	0.330075	-1.59913	2.04e-24	3.11e-22
Potra004413g24898	73.9852	111.249	36.721	0.330078	-1.59912	5.35e-11	2.11e-09
Potra001174g10173	798.242	1199.76	396.728	0.330674	-1.59652	6.25e-05	0.000799309
Potra001647g13505	409.716	615.672	203.761	0.330957	-1.59529	3.88e-21	4.64e-19
Potra001108g09711	105.628	158.711	52.5451	0.331075	-1.59477	3.02e-13	1.59e-11
Potra001746g14232	23.8689	35.8615	11.8763	0.331172	-1.59435	0.00361147	0.0252332
Potra002264g17371	468.079	703.163	232.994	0.331351	-1.59357	9.67e-31	2.32e-28
Potra000583g04350	23.2477	34.9078	11.5875	0.331945	-1.59098	0.00173645	0.013763
Potra004419g24903	405.099	608.2	201.998	0.332125	-1.5902	0.00439685	0.0295416
Potra004011g24194	42.1742	63.2872	21.0611	0.332786	-1.58733	3.31e-07	7.34e-06
Potra001310g11259	63.8508	95.7948	31.9069	0.333076	-1.58608	4.38e-09	1.33e-07
Potra175785g27830	113.334	169.961	56.7059	0.33364	-1.58364	2.61e-14	1.55e-12
Potra002590g19477	147.442	221.055	73.8287	0.333983	-1.58215	2.26e-10	8.16e-09
Potra003910g23470	105.765	158.535	52.9957	0.334284	-1.58086	2.49e-09	7.8e-08
Potra001332g11453	88.2352	132.16	44.3104	0.335278	-1.57657	1.76e-11	7.39e-10
Potra001520g12654	150.205	224.627	75.7825	0.33737	-1.5676	2.56e-17	2.16e-15
Potra002030g15892	53.4771	79.953	27.0013	0.337715	-1.56612	9.42e-09	2.72e-07
Potra001089g09474	21.2842	31.8204	10.7479	0.337769	-1.56589	0.00239704	0.0179801
Potra000577g04303	33.7602	50.4528	17.0676	0.338288	-1.56368	6.49e-06	0.000109551
Potra000509g03351	26.4009	39.3956	13.4063	0.3403	-1.55512	0.000918099	0.00803907
Potra001764g14351	56.4372	84.2137	28.6607	0.340333	-1.55498	3.9e-09	1.19e-07
Potra001650g13528	53.8635	80.3382	27.3887	0.340917	-1.55251	1.23e-07	2.91e-06
Potra000794g06299	16.3328	24.352	8.31365	0.341394	-1.55049	0.000596702	0.00563426
Potra001700g13886	1044.26	1556.2	532.313	0.342059	-1.54768	1.04e-05	0.000165543
Potra183808g28334	12.167	18.1304	6.20368	0.34217	-1.54722	0.0034795	0.024477
Potra000682g05287	268.002	399.335	136.668	0.342239	-1.54693	3.52e-17	2.9e-15
Potra006708g25758	117.829	175.525	60.1343	0.342597	-1.54541	1.56e-13	8.43e-12
Potra000935g07632	99.784	148.636	50.9314	0.342658	-1.54516	1.48e-08	4.12e-07
Potra001572g34885	245.673	365.842	125.504	0.343054	-1.54349	2.01e-16	1.54e-14
Potra002256g17336	13.0361	19.4007	6.6716	0.343885	-1.54	0.00648179	0.0401395
Potra003395g21547	17.0191	25.3197	8.71846	0.344335	-1.53812	0.00141678	0.0116266
Potra161138g26905	98.197	145.982	50.4121	0.345332	-1.53395	0.00012951	0.00151345
Potra003680g22411	46.0853	68.5048	23.6659	0.345464	-1.53339	0.000269515	0.00286344
Potra001726g14041	35.5281	52.7695	18.2867	0.34654	-1.52891	2.3e-06	4.29e-05
Potra002482g18765	122.664	182.183	63.1455	0.346605	-1.52864	4.43e-10	1.54e-08
Potra002967g20414	26.4391	39.2477	13.6304	0.347292	-1.52578	7.26e-05	0.000913398
Potra004207g24683	48.2865	71.6777	24.8952	0.347322	-1.52566	0.000609789	0.00573192
Potra000864g06976	137.323	203.819	70.8279	0.347504	-1.5249	1.02e-11	4.41e-10
Potra003260g21148	88.0833	130.708	45.4584	0.347786	-1.52373	1.83e-05	0.000270735
Potra001117g09861	14.4093	21.3761	7.44253	0.34817	-1.52214	0.00397337	0.0272488
Potra000876g07061	92.5034	137.214	47.7925	0.348306	-1.52157	7.59e-08	1.86e-06
Potra004317g24810	14.2538	21.1282	7.37942	0.349269	-1.51759	0.0080567	0.0475443
Potra001116g09813	56.2705	83.4061	29.1349	0.349313	-1.51741	2.09e-06	3.94e-05
Potra002161g16697	36.8373	54.5996	19.0751	0.349363	-1.5172	2.98e-06	5.42e-05
Potra002240g17217	126.948	188.138	65.7589	0.349525	-1.51653	1.63e-14	9.82e-13
Potra007987g26074	17.7844	26.3509	9.21793	0.349815	-1.51534	0.0037178	0.0258388
Potra001066g09176	103.066	152.62	53.5132	0.350631	-1.51197	0.000215668	0.00236818
Potra000858g06950	36.3141	53.744	18.8841	0.351371	-1.50893	0.00083745	0.00741452
Potra000934g07628	352.785	521.47	184.1	0.353041	-1.50209	3.13e-14	1.84e-12
Potra001634g13446	552.366	816.123	288.609	0.353634	-1.49967	1.93e-21	2.39e-19
Potra000760g06009	64.3949	95.1169	33.6729	0.354016	-1.49811	4.66e-08	1.2e-06
Potra002678g19729	859.937	1270.05	449.824	0.354178	-1.49745	0.00310286	0.0222951
Potra000488g03047	12.2556	18.0991	6.41202	0.354273	-1.49707	0.00500157	0.0327047
Potra000119g00391	558.642	824.718	292.566	0.354746	-1.49514	1.5e-11	6.35e-10
Potra002841g20103	14.3996	21.2565	7.54272	0.354843	-1.49475	0.00533209	0.0343733
Potra002175g16777	29.7464	43.8961	15.5968	0.355312	-1.49284	0.000599109	0.00565315
Potra000797g06322	106.41	156.862	55.9587	0.356738	-1.48706	3.19e-08	8.44e-07
Potra000436g02372	44.5239	65.6329	23.4149	0.356755	-1.48699	2.32e-06	4.32e-05
Potra003682g22423	23.3903	34.4538	12.3269	0.35778	-1.48286	0.00042458	0.00422697
Potra000520g03516	409.309	602.703	215.915	0.358245	-1.48098	1.25e-26	2.28e-24
Potra000443g02459	32.1286	47.3057	16.9516	0.358342	-1.48059	3.59e-05	0.000491234
Potra193688g34304	15.8856	23.377	8.39415	0.359077	-1.47763	0.00184863	0.014528
Potra000226g00916	503.679	741.083	266.276	0.359306	-1.47671	4.47e-29	9.42e-27
Potra001316g11298	90.6807	133.354	48.0071	0.359997	-1.47394	4.22e-05	0.000565841
Potra195190g31539	101.958	149.898	54.0175	0.360362	-1.47248	1.4e-05	0.000214629
Potra000366g01493	371.489	546.159	196.819	0.360369	-1.47245	3.31e-20	3.58e-18
Potra002050g16004	35.7269	52.5225	18.9314	0.360445	-1.47215	1.62e-05	0.000242749
Potra000082g00290	91.724	134.82	48.6282	0.36069	-1.47117	3.58e-11	1.45e-09
Potra196538g29116	26.3042	38.6418	13.9666	0.361438	-1.46818	3.59e-05	0.000491249
Potra001824g14705	19.8017	29.0661	10.5373	0.362528	-1.46383	0.00109271	0.0093074
Potra005431g25392	142.293	208.744	75.8417	0.363323	-1.46067	1.38e-14	8.43e-13
Potra002407g18315	86.4791	126.862	46.096	0.363355	-1.46055	4.22e-11	1.69e-09
Potra003956g23750	172.559	253.131	91.9876	0.3634	-1.46037	9.63e-17	7.55e-15
Potra001042g08794	1859.97	2728.34	991.604	0.363446	-1.46019	4.32e-42	1.82e-39
Potra001346g11555	37.0423	54.3152	19.7694	0.363975	-1.45809	0.00121643	0.0101889
Potra000531g03700	265.697	389.524	141.87	0.364215	-1.45714	7.43e-16	5.28e-14
Potra003820g22981	31.0803	45.5001	16.6605	0.366163	-1.44944	6.26e-05	0.000799802
Potra000919g07449	504.009	737.432	270.586	0.366929	-1.44643	1.09e-10	4.11e-09
Potra162483g27017	53.6517	78.4754	28.8279	0.36735	-1.44477	0.00715271	0.0433563
Potra000827g06591	38.3987	56.1592	20.6382	0.367495	-1.44421	1.61e-06	3.08e-05
Potra003493g21821	699.286	1022.71	375.857	0.367509	-1.44415	2.8e-05	0.000395238
Potra002005g15735	19.3275	28.263	10.3921	0.367691	-1.44343	0.00152481	0.0123244
Potra002412g18355	1243.26	1817.56	668.965	0.368057	-1.442	3.85e-36	1.23e-33
Potra001008g08390	1054.06	1540.11	568.023	0.36882	-1.43901	1.12e-09	3.69e-08
Potra000149g00527	87.9724	128.476	47.4682	0.36947	-1.43647	3.64e-08	9.54e-07
Potra000355g01382	38.1632	55.7018	20.6247	0.370271	-1.43335	4.31e-05	0.000575785
Potra000424g02224	47.1331	68.7926	25.4736	0.370295	-1.43325	1.19e-05	0.000185789
Potra150981g26678	83.5263	121.838	45.2146	0.371105	-1.4301	9.2e-10	3.06e-08
Potra001553g12866	34.2569	49.9477	18.566	0.371709	-1.42775	9.63e-05	0.00116681
Potra001682g13769	120.733	176.027	65.4385	0.371752	-1.42759	7.64e-12	3.39e-10
Potra184591g34738	32.0328	46.6935	17.3722	0.372048	-1.42644	0.00328469	0.0233642
Potra000762g06024	54.808	79.8405	29.7756	0.372939	-1.42299	3.38e-05	0.000465345
Potra001247g10724	34.2482	49.8853	18.611	0.373077	-1.42246	0.00198299	0.0153799
Potra000682g05279	18.0884	26.3354	9.84134	0.373692	-1.42008	0.00543755	0.034956
Potra006357g25663	20.6129	30.0099	11.2158	0.373739	-1.4199	0.00320923	0.0228915
Potra000623g33073	27.395	39.8537	14.9363	0.374778	-1.41589	0.00120243	0.0100877
Potra001149g10016	189.764	275.964	103.564	0.375282	-1.41395	1.01e-15	6.92e-14
Potra000945g07746	113.114	164.399	61.8285	0.376089	-1.41085	2.24e-09	7.05e-08
Potra000967g07959	91.2582	132.6	49.9167	0.376446	-1.40948	0.000174078	0.00197137
Potra001734g14121	295.396	429.117	161.675	0.376761	-1.40828	1.07e-09	3.52e-08
Potra001477g12369	92.2703	134.027	50.514	0.376896	-1.40776	2.6e-07	5.89e-06
Potra000656g33135	23.8954	34.6914	13.0994	0.377598	-1.40508	0.000815481	0.00726624
Potra002580g19403	23.9827	34.8013	13.1641	0.378265	-1.40253	0.00138377	0.0113983
Potra001414g11999	152.243	220.86	83.6259	0.378637	-1.40111	1e-07	2.41e-06
Potra000869g06999	21.1348	30.6528	11.6167	0.378978	-1.39982	0.000936875	0.00818802
Potra000154g00549	189.363	274.623	104.103	0.379077	-1.39944	2.26e-05	0.000327524
Potra000915g07427	68.5943	99.4497	37.7389	0.379478	-1.39791	4.83e-07	1.04e-05
Potra000858g06960	130.459	189.131	71.7874	0.379563	-1.39759	3.61e-07	7.9e-06
Potra004513g25013	91.985	133.295	50.675	0.380172	-1.39527	9.29e-10	3.09e-08
Potra001237g10627	22.7697	32.9883	12.551	0.380467	-1.39416	0.000650163	0.00603466
Potra000832g06671	36.1266	52.2896	19.9636	0.381788	-1.38916	4.32e-05	0.000576134
Potra000870g07016	14.473	20.9393	8.00673	0.382377	-1.38693	0.00424803	0.0287709
Potra003896g23394	28.7482	41.5792	15.9172	0.382816	-1.38528	3.67e-05	0.000498989
Potra003784g22850	4039.75	5838.27	2241.24	0.383888	-1.38124	2.28e-42	1.01e-39
Potra002932g20336	51.2691	74.0842	28.454	0.384076	-1.38053	0.000252274	0.00270609
Potra004140g24620	25.5757	36.9568	14.1946	0.384087	-1.38049	0.000189915	0.00212564
Potra004014g24229	91.0648	131.584	50.5456	0.384132	-1.38033	2.95e-10	1.05e-08
Potra000689g05349	16.488	23.8228	9.15321	0.38422	-1.37999	0.00719088	0.0435142
Potra003028g20565	21.7604	31.4377	12.0831	0.384349	-1.37951	0.00510134	0.0332244
Potra000987g08155	798.298	1152.91	443.691	0.384846	-1.37765	3.12e-22	4.06e-20
Potra000869g07001	45.4221	65.5955	25.2488	0.384916	-1.37738	3.28e-06	5.9e-05
Potra001123g09905	179.154	258.707	99.6007	0.384995	-1.37709	2.5e-13	1.33e-11
Potra165170g34688	268.782	388.129	149.435	0.385015	-1.37701	1.65e-15	1.12e-13
Potra003920g23521	114.64	165.506	63.7728	0.38532	-1.37587	3.22e-12	1.5e-10
Potra001508g12585	39.2782	56.6731	21.8833	0.386131	-1.37284	4.14e-05	0.000555092
Potra001067g09194	1375.03	1982.14	767.915	0.387417	-1.36804	5.34e-35	1.62e-32
Potra167387g27272	539.81	778.054	301.566	0.38759	-1.3674	7.81e-20	8.17e-18
Potra001781g14491	58.2086	83.8513	32.5658	0.388375	-1.36448	2.91e-05	0.000407611
Potra194532g28964	45.9296	66.1615	25.6977	0.388409	-1.36435	2.33e-06	4.33e-05
Potra001053g09003	73.478	105.821	41.1351	0.388724	-1.36318	1.19e-08	3.38e-07
Potra000700g05448	70.8248	101.996	39.6541	0.388782	-1.36297	2.93e-08	7.78e-07
Potra199865g29449	73.6016	105.966	41.2369	0.389151	-1.3616	7.45e-08	1.83e-06
Potra002152g16648	47.6361	68.574	26.6983	0.389336	-1.36091	2.43e-06	4.49e-05
Potra003384g21516	41.8817	60.2878	23.4757	0.389394	-1.3607	5.82e-06	9.93e-05
Potra001633g13431	12.0728	17.3777	6.76788	0.389457	-1.36046	0.00260048	0.0192415
Potra000569g04206	602.974	867.844	338.104	0.389591	-1.35997	2.22e-27	4.24e-25
Potra000178g00690	52.2781	75.1972	29.359	0.390426	-1.35688	1.38e-06	2.69e-05
Potra001099g09584	18.5025	26.5813	10.4236	0.392141	-1.35056	0.002472	0.0184659
Potra000797g06321	202.282	290.562	114.002	0.39235	-1.34979	1.3e-06	2.56e-05
Potra003628g22212	52.9248	76.0108	29.8388	0.392559	-1.34902	8.98e-06	0.000146169
Potra181399g34792	44.7667	64.2665	25.2669	0.393158	-1.34682	1.31e-05	0.000203162
Potra186647g28448	92.4716	132.724	52.2192	0.393442	-1.34578	3.83e-09	1.17e-07
Potra000513g03387	12.6418	18.144	7.13952	0.393491	-1.3456	0.00715389	0.0433563
Potra002436g18482	154.678	221.781	87.5744	0.394869	-1.34055	4.78e-06	8.28e-05
Potra007622g26002	15.3916	22.0489	8.73424	0.39613	-1.33596	0.00795447	0.0470725
Potra199344g29396	18.7695	26.8738	10.6651	0.396859	-1.3333	0.0016756	0.0133454
Potra000566g04168	27.054	38.7353	15.3727	0.396865	-1.33328	0.000552023	0.00526931
Potra000556g04027	41.2531	59.0464	23.4599	0.397313	-1.33165	1.95e-05	0.000287628
Potra006306g25646	3537.8	5063.45	2012.15	0.397387	-1.33138	3.75e-28	7.52e-26
Potra002072g16153	25.6107	36.6551	14.5663	0.397388	-1.33138	0.00156782	0.0126169
Potra000762g06017	17.4748	25.0081	9.94153	0.397533	-1.33086	0.00273027	0.0200792
Potra003847g23128	311.35	445.542	177.158	0.397623	-1.33053	2.65e-10	9.5e-09
Potra003627g22209	37.585	53.7727	21.3973	0.397921	-1.32945	1.32e-05	0.000204684
Potra000656g05055	164.924	235.934	93.9139	0.398052	-1.32897	1.34e-13	7.29e-12
Potra000276g01030	19.9321	28.4913	11.3729	0.399173	-1.32492	0.0015444	0.0124681
Potra006097g25566	46.7305	66.7943	26.6667	0.399236	-1.32469	1.23e-05	0.000192686
Potra001875g35312	103.793	148.258	59.3279	0.400166	-1.32133	2.49e-05	0.000355507
Potra183594g28318	1659.92	2370.61	949.233	0.400417	-1.32043	1.36e-33	3.83e-31
Potra001890g15045	669.264	955.633	382.895	0.400671	-1.31951	2.7e-26	4.79e-24
Potra003839g23070	27.4554	39.1863	15.7246	0.401279	-1.31732	0.000133504	0.0015549
Potra000374g01591	163.199	232.903	93.4955	0.401436	-1.31676	5.58e-08	1.41e-06
Potra002246g17253	32.0043	45.6729	18.3357	0.401456	-1.31669	0.000257825	0.00276105
Potra001181g10228	21.3415	30.4548	12.2283	0.401522	-1.31645	0.00197809	0.0153505
Potra000527g03647	541.821	773.062	310.579	0.401751	-1.31563	1.13e-24	1.77e-22
Potra000783g06181	20.0981	28.6599	11.5362	0.402522	-1.31286	0.00378499	0.0262283
Potra001301g11191	77.3138	110.225	44.4027	0.402837	-1.31173	5.48e-07	1.17e-05
Potra007768g26023	19.7524	28.1438	11.3611	0.40368	-1.30872	0.00381388	0.0263825
Potra001022g08539	782.221	1114.41	450.034	0.403832	-1.30817	1.9e-24	2.91e-22
Potra001133g09948	82.2214	117.136	47.3072	0.403867	-1.30805	9.48e-09	2.73e-07
Potra000310g01111	49.8186	70.9726	28.6646	0.403883	-1.30799	4.66e-06	8.09e-05
Potra001059g09090	130.289	185.595	74.9825	0.404012	-1.30753	4.14e-10	1.45e-08
Potra000864g06982	313.955	447.224	180.686	0.404017	-1.30751	1.46e-05	0.000222901
Potra000710g34723	34.435	49.0343	19.8357	0.404528	-1.30569	0.00013932	0.00161656
Potra002497g18860	56.9217	81.0512	32.7922	0.404586	-1.30548	2.14e-05	0.000311449
Potra001453g12239	246.351	350.727	141.974	0.404799	-1.30472	6.77e-05	0.000860077
Potra004487g24975	431.961	614.834	249.087	0.405129	-1.30355	5.32e-12	2.41e-10
Potra001355g11614	32.3664	46.0586	18.6742	0.405443	-1.30243	0.001024	0.00881391
Potra003440g21670	195.274	277.836	112.712	0.405678	-1.30159	7.56e-12	3.36e-10
Potra002900g20266	44.7812	63.6863	25.8761	0.406306	-1.29936	1.68e-05	0.000251143
Potra001270g10970	285.73	406.287	165.173	0.406542	-1.29853	7.6e-15	4.8e-13
Potra002409g18326	191.466	272.1	110.832	0.407323	-1.29576	1.06e-14	6.58e-13
Potra001051g08957	37.0661	52.6742	21.4581	0.407374	-1.29557	1.61e-05	0.000242749
Potra000179g00696	21.538	30.6039	12.4721	0.407533	-1.29501	0.00490159	0.032225
Potra001507g12582	51.1109	72.6237	29.5982	0.407555	-1.29493	1.35e-05	0.000208539
Potra003115g20776	38.07	54.0838	22.0561	0.407814	-1.29402	7.15e-05	0.000904002
Potra002503g18898	200.092	284.203	115.981	0.408092	-1.29303	7.46e-15	4.74e-13
Potra001009g08392	46.6009	66.1784	27.0233	0.40834	-1.29216	1.42e-05	0.000218091
Potra002545g19175	22.6102	32.1052	13.1152	0.408507	-1.29157	0.000780261	0.00700624
Potra001733g14102	164.257	233.226	95.2875	0.408563	-1.29137	4.01e-06	7.08e-05
Potra000757g05970	119.851	170.173	69.5283	0.408574	-1.29133	2.89e-11	1.18e-09
Potra001975g15567	54.2759	77.0536	31.4982	0.408783	-1.29059	2.34e-06	4.34e-05
Potra003938g23642	108.069	153.408	62.7288	0.408901	-1.29018	5.48e-10	1.89e-08
Potra001078g30516	21.3335	30.2755	12.3916	0.409294	-1.28879	0.00484366	0.0319649
Potra000876g07060	221.996	315.031	128.962	0.409363	-1.28855	2.86e-06	5.22e-05
Potra001051g08950	33.0216	46.8562	19.1871	0.40949	-1.2881	0.000167762	0.00190216
Potra000557g04042	24.0139	34.0731	13.9547	0.409553	-1.28788	0.00144439	0.0118183
Potra002346g17917	320.427	454.638	186.217	0.409594	-1.28773	4.21e-18	3.83e-16
Potra001751g14275	95.5696	135.597	55.542	0.40961	-1.28768	7.58e-09	2.22e-07
Potra002081g16213	350.013	496.449	203.577	0.410067	-1.28607	1.81e-10	6.61e-09
Potra000492g03122	1420.58	2014.76	826.396	0.41017	-1.2857	2.08e-25	3.41e-23
Potra003682g22422	26.4054	37.4405	15.3704	0.410528	-1.28445	0.000749389	0.00677272
Potra000602g04571	405.796	574.97	236.622	0.411538	-1.2809	1.86e-21	2.31e-19
Potra000439g02400	22.1572	31.3761	12.9384	0.412365	-1.278	0.00283048	0.0206742
Potra001323g11353	85.8505	121.56	50.1408	0.412477	-1.27761	1.2e-06	2.38e-05
Potra000785g06208	2102.04	2976.28	1227.81	0.412531	-1.27743	1.15e-33	3.27e-31
Potra000537g03758	40.5704	57.4411	23.6998	0.412593	-1.27721	1.16e-05	0.0001823
Potra002283g17493	141.752	200.654	82.8511	0.412906	-1.27612	7.09e-08	1.75e-06
Potra000831g06666	40.4032	57.1856	23.6209	0.413057	-1.27559	9.74e-05	0.001178
Potra196687g29136	72.124	102.078	42.1695	0.413109	-1.27541	5.09e-06	8.78e-05
Potra003926g23554	17.8754	25.2783	10.4726	0.414291	-1.27128	0.00429377	0.0290101
Potra002158g16675	369.583	522.586	216.58	0.414438	-1.27077	2.74e-07	6.18e-06
Potra003940g23654	217.997	308.223	127.77	0.41454	-1.27042	7.32e-15	4.66e-13
Potra000545g03871	48.4475	68.49	28.405	0.414733	-1.26975	2.61e-05	0.000370747
Potra009913g26449	95.3381	134.766	55.9097	0.414864	-1.26929	3.51e-06	6.27e-05
Potra002306g17586	219.867	310.545	129.189	0.416008	-1.26532	4.38e-15	2.86e-13
Potra000601g04563	35.0326	49.3916	20.6737	0.418567	-1.25647	0.000378053	0.00382394
Potra003240g21107	80.3091	113.142	47.4762	0.419616	-1.25286	2.45e-08	6.57e-07
Potra004009g24162	20.6177	29.0387	12.1967	0.420016	-1.25148	0.00356825	0.0249751
Potra000544g03847	18.1414	25.5507	10.7321	0.420033	-1.25143	0.00586035	0.0370747
Potra000424g02233	99.971	140.76	59.182	0.420446	-1.25001	8.79e-09	2.55e-07
Potra001821g14692	34.9836	49.2524	20.7148	0.420584	-1.24953	0.000752844	0.00679953
Potra001866g14930	44.5957	62.7843	26.4071	0.420601	-1.24948	7.27e-05	0.000913871
Potra001388g11813	98.6905	138.941	58.4396	0.420606	-1.24946	1.22e-08	3.43e-07
Potra002263g17364	64.5103	90.8138	38.2069	0.420717	-1.24908	1.13e-06	2.25e-05
Potra002947g20368	107.61	151.458	63.7617	0.420987	-1.24815	1.48e-09	4.77e-08
Potra001741g31191	72.7381	102.338	43.1385	0.421532	-1.24629	1.25e-06	2.46e-05
Potra000215g00894	263.201	370.302	156.099	0.421545	-1.24624	2.85e-14	1.68e-12
Potra001406g11934	67.6027	95.1031	40.1023	0.421672	-1.24581	2.36e-07	5.36e-06
Potra002482g18767	159.627	224.553	94.7013	0.421732	-1.2456	4.96e-13	2.56e-11
Potra004476g24962	152.665	214.721	90.6091	0.421985	-1.24474	1.62e-10	5.9e-09
Potra004058g24401	59.6334	83.8698	35.397	0.422047	-1.24452	1.93e-05	0.000285134
Potra001450g12202	432.579	608.056	257.102	0.422827	-1.24186	6.19e-10	2.12e-08
Potra000857g06934	417.375	586.511	248.24	0.423248	-1.24042	3.04e-20	3.32e-18
Potra010306g26557	156.709	220.21	93.2084	0.423271	-1.24035	1.23e-08	3.46e-07
Potra000668g05175	13822.8	19415	8230.66	0.423934	-1.23809	4.09e-31	1e-28
Potra002662g19694	105.055	147.514	62.5955	0.424336	-1.23672	1.82e-08	4.98e-07
Potra001684g13796	61.0848	85.7713	36.3983	0.424364	-1.23662	3.62e-06	6.45e-05
Potra002624g19599	45.4201	63.7387	27.1015	0.425196	-1.2338	8.29e-05	0.00102485
Potra002405g18297	144.169	202.257	86.0816	0.425605	-1.23241	5.12e-09	1.53e-07
Potra001247g10734	462.495	648.79	276.2	0.425715	-1.23204	3.37e-11	1.37e-09
Potra000673g05217	68.676	96.3131	41.0388	0.426098	-1.23074	5.07e-07	1.09e-05
Potra000151g00536	38.1399	53.4511	22.8287	0.427094	-1.22737	0.000391499	0.00393705
Potra167069g27254	77.7649	108.933	46.5971	0.42776	-1.22513	2.51e-06	4.63e-05
Potra000352g01304	260.722	365.135	156.309	0.428085	-1.22403	1.32e-15	9.06e-14
Potra183028g28276	38.6962	54.1882	23.2042	0.428216	-1.22359	7.25e-05	0.00091263
Potra001161g10075	127.046	177.863	76.2298	0.428588	-1.22234	2.19e-07	5e-06
Potra183351g28297	28.1593	39.4182	16.9004	0.428745	-1.22181	0.00185805	0.0145774
Potra002285g17508	5411.72	7574.57	3248.87	0.428918	-1.22123	4.17e-20	4.47e-18
Potra001814g14650	298.432	417.512	179.352	0.429574	-1.21902	1.54e-16	1.19e-14
Potra001339g11480	29.9377	41.8443	18.0311	0.430909	-1.21455	0.00714155	0.0433004
Potra002839g20100	76.3091	106.633	45.9856	0.431253	-1.21339	3.08e-07	6.85e-06
Potra003108g20756	105.598	147.538	63.6592	0.431478	-1.21264	2.6e-09	8.11e-08
Potra002347g17924	1683.77	2352.35	1015.19	0.431563	-1.21236	2.89e-29	6.3e-27
Potra003912g23476	355.976	497.313	214.64	0.4316	-1.21223	5.77e-08	1.46e-06
Potra000845g06814	849.172	1185.92	512.423	0.432089	-1.2106	1.33e-24	2.07e-22
Potra002272g17419	1780.4	2486.14	1074.66	0.432262	-1.21002	4.03e-29	8.63e-27
Potra002128g16499	36.9297	51.5287	22.3308	0.433367	-1.20634	0.00020559	0.00227456
Potra002630g19613	239.084	333.591	144.576	0.433393	-1.20625	1.35e-14	8.3e-13
Potra003673g22394	77.1131	107.584	46.6421	0.433542	-1.20576	4.15e-07	9e-06
Potra000665g05147	113.331	158.103	68.5593	0.433637	-1.20544	0.000327915	0.00338696
Potra190055g28742	508.757	709.669	307.845	0.433787	-1.20494	1.58e-11	6.66e-10
Potra000458g02642	1348.68	1880.59	816.774	0.434319	-1.20317	1.62e-27	3.14e-25
Potra002748g19897	233.513	325.593	141.433	0.434387	-1.20295	1.01e-14	6.29e-13
Potra001967g15516	76.0261	106.003	46.0494	0.434417	-1.20285	0.000346629	0.00354864
Potra004111g24522	33.272	46.3849	20.1591	0.434605	-1.20222	0.00163418	0.0130603
Potra003641g22253	174.743	243.402	106.083	0.435834	-1.19815	1.28e-11	5.48e-10
Potra003046g20616	29.1238	40.5589	17.6887	0.436123	-1.19719	0.000268709	0.00285706
Potra003967g32472	76.1178	105.979	46.257	0.436475	-1.19603	5.16e-07	1.11e-05
Potra004323g24815	200.957	279.701	122.213	0.436941	-1.19449	2.36e-13	1.26e-11
Potra196424g29104	43.9152	61.1163	26.7141	0.437102	-1.19396	5.07e-05	0.00066278
Potra002486g18798	925.618	1288.08	563.154	0.437204	-1.19362	3.46e-25	5.63e-23
Potra002104g16362	39.0529	54.3406	23.7652	0.437338	-1.19318	7.92e-05	0.000984381
Potra199836g29445	18.3988	25.5975	11.2001	0.437546	-1.19249	0.00685639	0.0419455
Potra001727g14050	75.8732	105.552	46.1939	0.437639	-1.19219	6.51e-07	1.36e-05
Potra000780g33337	53.817	74.8654	32.7686	0.4377	-1.19198	4.96e-05	0.000650055
Potra001813g14643	105.004	146.053	63.9542	0.437884	-1.19138	4.57e-08	1.18e-06
Potra002465g18670	62.2604	86.591	37.9299	0.438035	-1.19088	0.000187386	0.00210118
Potra002493g18841	45.0207	62.5999	27.4416	0.438364	-1.1898	3.36e-05	0.000462345
Potra001622g13347	304.223	422.918	185.529	0.438689	-1.18873	3.76e-15	2.47e-13
Potra002455g18605	32.9653	45.8235	20.1072	0.438796	-1.18838	0.000377119	0.00381588
Potra002229g17130	37.7697	52.4844	23.0551	0.439276	-1.1868	0.00022634	0.00246881
Potra003957g23755	1207.79	1678.23	737.351	0.439361	-1.18652	0.00281333	0.0205856
Potra194917g28997	52.0924	72.378	31.8067	0.439453	-1.18622	1.29e-05	0.000199856
Potra000246g00972	27.9713	38.8632	17.0794	0.439476	-1.18614	0.000962045	0.00837121
Potra002115g16428	740.568	1028.8	452.337	0.439675	-1.18549	4.61e-21	5.49e-19
Potra004137g24602	22.754	31.6006	13.9074	0.440099	-1.1841	0.00434091	0.0292434
Potra003962g23785	112.094	155.668	68.5199	0.440166	-1.18388	3.44e-09	1.06e-07
Potra001047g08873	50.2006	69.7071	30.6941	0.440329	-1.18334	1.43e-05	0.000218637
Potra000827g06596	60.3977	83.8448	36.9506	0.440703	-1.18212	6.54e-06	0.000110266
Potra001448g12193	272.899	378.789	167.009	0.440904	-1.18146	8.83e-14	4.89e-12
Potra152638g26711	280.882	389.804	171.959	0.441142	-1.18068	1.45e-14	8.81e-13
Potra003767g22760	296.852	411.86	181.843	0.441517	-1.17946	3.42e-07	7.55e-06
Potra000026g00128	22.0332	30.5637	13.5026	0.441785	-1.17858	0.00225895	0.0171103
Potra000488g32753	228.397	316.822	139.971	0.441797	-1.17855	9.44e-08	2.28e-06
Potra001005g08364	102.915	142.736	63.095	0.442041	-1.17775	3.65e-05	0.000497867
Potra000567g04178	498.067	690.757	305.377	0.44209	-1.17759	2.92e-16	2.2e-14
Potra001064g09144	30.6318	42.4758	18.7878	0.442318	-1.17684	0.000838323	0.00741989
Potra000818g06513	1193.97	1655.39	732.545	0.44252	-1.17619	4.54e-26	7.95e-24
Potra000178g00694	120.795	167.473	74.1176	0.442565	-1.17604	9.61e-06	0.000155272
Potra195133g29015	13.966	19.3611	8.57093	0.442688	-1.17564	0.00824628	0.0484678
Potra000904g07338	661.433	916.896	405.971	0.442767	-1.17538	6.97e-22	8.78e-20
Potra003119g20785	92.9961	128.887	57.1051	0.443063	-1.17442	5.79e-08	1.46e-06
Potra002480g18759	2158.6	2991.53	1325.66	0.443139	-1.17417	1.49e-25	2.48e-23
Potra003329g32151	27.6266	38.2723	16.9809	0.443685	-1.17239	0.00136833	0.0112789
Potra000897g07280	59.1363	81.924	36.3487	0.443688	-1.17238	2.54e-06	4.69e-05
Potra000945g07744	590.601	818.123	363.078	0.443794	-1.17204	0.000104979	0.00125956
Potra003935g23621	47.443	65.7179	29.168	0.443837	-1.1719	0.00567853	0.0362125
Potra000930g33525	216.994	300.538	133.449	0.444035	-1.17126	1.8e-12	8.66e-11
Potra003601g22127	63.555	88.0201	39.0899	0.444101	-1.17104	3.49e-06	6.25e-05
Potra000823g06564	41.142	56.9737	25.3103	0.444245	-1.17057	0.000226981	0.00247484
Potra002954g20386	29.1634	40.3746	17.9522	0.44464	-1.16929	0.00744658	0.0447116
Potra001077g09302	194.863	269.769	119.957	0.444667	-1.1692	2.77e-12	1.3e-10
Potra000950g07775	826.083	1142.97	509.195	0.445502	-1.1665	0.000185955	0.00208972
Potra000640g04885	327.304	452.638	201.971	0.446209	-1.16421	6.22e-16	4.46e-14
Potra002426g18434	70.7493	97.8155	43.683	0.446586	-1.16299	7.57e-05	0.000947017
Potra000454g02582	94.8328	131.078	58.5878	0.446969	-1.16175	2.86e-07	6.4e-06
Potra006965g33208	39.7858	54.9833	24.5883	0.447195	-1.16102	0.00144146	0.0117995
Potra001633g13423	299.012	413.195	184.83	0.447319	-1.16062	8.74e-06	0.000142587
Potra004122g24540	79.3249	109.615	49.0353	0.447343	-1.16055	0.00448945	0.0300332
Potra001520g30884	193.231	266.988	119.474	0.447489	-1.16008	3.78e-12	1.75e-10
Potra001443g12140	37.2126	51.404	23.0212	0.447849	-1.15892	0.000379981	0.003837
Potra008145g34585	70.5389	97.4137	43.6641	0.448233	-1.15768	2.15e-06	4.03e-05
Potra001684g13783	135.888	187.654	84.1222	0.448282	-1.15752	3.4e-10	1.2e-08
Potra000405g01946	37.4906	51.7516	23.2296	0.448867	-1.15564	0.000336768	0.00345914
Potra006293g25641	23.578	32.5423	14.6136	0.449065	-1.15501	0.00200585	0.0155002
Potra002665g19705	35.9897	49.662	22.3173	0.449384	-1.15398	0.000283716	0.00299375
Potra000177g00680	473.885	653.868	293.901	0.44948	-1.15367	1.35e-18	1.3e-16
Potra004440g24924	31.4398	43.3502	19.5295	0.450506	-1.15038	0.000802886	0.00717238
Potra000701g05464	53.3153	73.5006	33.13	0.450744	-1.14962	0.000832101	0.00738831
Potra173688g27662	984.082	1356.49	611.677	0.450927	-1.14903	1.46e-09	4.74e-08
Potra001534g12733	49.4736	68.1844	30.7627	0.451169	-1.14826	0.00813314	0.0479141
Potra001273g10997	65.5972	90.3678	40.8266	0.451783	-1.1463	4.61e-06	8.02e-05
Potra001300g11187	27.2029	37.47	16.9358	0.451984	-1.14566	0.000984109	0.00852057
Potra001066g09175	578.459	796.587	360.332	0.452344	-1.14451	8.39e-14	4.67e-12
Potra001204g10396	39.3054	54.1187	24.492	0.452561	-1.14382	0.000481701	0.0046949
Potra157685g26806	91.3743	125.808	56.9402	0.452595	-1.14371	2.77e-08	7.36e-07
Potra001117g35796	208.581	287.153	130.009	0.452753	-1.14321	5.19e-07	1.11e-05
Potra002037g15928	167.957	231.186	104.729	0.453008	-1.14239	1.01e-10	3.82e-09
Potra003829g23023	37.3273	51.358	23.2966	0.453612	-1.14047	0.000466658	0.00457859
Potra000942g07711	232.903	320.284	145.522	0.454354	-1.13811	4.33e-13	2.24e-11
Potra000958g07862	65.7848	90.448	41.1216	0.454644	-1.13719	1.1e-05	0.000174199
Potra001611g13276	51.5725	70.8563	32.2888	0.455694	-1.13386	3.53e-05	0.000482958
Potra003875g23280	30.4237	41.7881	19.0593	0.456093	-1.1326	0.00140262	0.0115206
Potra003613g22172	199.489	273.944	125.035	0.456425	-1.13155	8.42e-11	3.2e-09
Potra001002g08341	340.221	467.017	213.424	0.456995	-1.12975	4.07e-08	1.06e-06
Potra191685g28764	2065.07	2832.33	1297.82	0.458216	-1.1259	2.54e-26	4.56e-24
Potra001057g09053	1897.09	2601.93	1192.25	0.458219	-1.12589	5.49e-26	9.55e-24
Potra003793g22877	31.9399	43.8043	20.0756	0.458303	-1.12563	0.00105032	0.00899586
Potra000679g05266	70.9305	97.2633	44.5976	0.458524	-1.12493	1.07e-06	2.15e-05
Potra001770g14385	50.0527	68.6253	31.4801	0.458724	-1.1243	3.12e-05	0.000432905
Potra003976g23916	86.683	118.843	54.5233	0.458786	-1.12411	2.35e-07	5.34e-06
Potra001734g14129	279.861	383.594	176.129	0.459154	-1.12295	9.01e-14	4.98e-12
Potra001446g12174	27.3401	37.469	17.2112	0.459344	-1.12235	0.00398837	0.027318
Potra003983g23982	993.303	1360.95	625.655	0.459718	-1.12118	2e-22	2.65e-20
Potra002597g19513	53.0462	72.6436	33.4488	0.46045	-1.11888	9.68e-05	0.00117148
Potra198679g29340	24.7702	33.9104	15.63	0.46092	-1.11741	0.0067926	0.0416473
Potra001697g13866	662.822	906.981	418.662	0.461599	-1.11529	1.09e-07	2.6e-06
Potra190065g28743	382.69	523.62	241.761	0.46171	-1.11494	6.48e-08	1.62e-06
Potra001854g14851	54.4184	74.4562	34.3807	0.461758	-1.11479	4.96e-05	0.000649729
Potra001300g11186	78.4057	107.202	49.6098	0.46277	-1.11163	1.62e-06	3.11e-05
Potra000417g02133	68.8744	94.162	43.5868	0.462891	-1.11126	8.05e-06	0.000132022
Potra175505g35164	404.556	552.988	256.123	0.463163	-1.11041	3.61e-16	2.66e-14
Potra001534g12742	252.621	345.246	159.997	0.463429	-1.10958	3.75e-13	1.95e-11
Potra000573g04255	19.965	27.2851	12.645	0.463439	-1.10955	0.00317425	0.0227052
Potra001846g14816	34.2854	46.8019	21.7689	0.465129	-1.1043	0.00119725	0.0100563
Potra003426g21633	57.3987	78.3524	36.4449	0.465141	-1.10426	1.14e-05	0.000179593
Potra001701g13887	29.4347	40.1755	18.6939	0.465305	-1.10375	0.00291991	0.0212326
Potra170784g27547	1076.77	1469.31	684.233	0.465683	-1.10258	7.54e-14	4.22e-12
Potra003882g23316	92.6958	126.481	58.9105	0.465765	-1.10232	6.79e-06	0.000113809
Potra006322g34019	44.4653	60.6669	28.2637	0.465884	-1.10196	0.000604771	0.00569499
Potra000484g02984	36.3986	49.66	23.1372	0.465913	-1.10187	0.00320886	0.0228915
Potra001586g13113	121.584	165.873	77.2951	0.46599	-1.10163	9.7e-08	2.33e-06
Potra001567g12957	34.2165	46.6759	21.757	0.46613	-1.1012	0.00578702	0.0367686
Potra001257g10844	126.302	172.286	80.3189	0.466196	-1.10099	6.46e-09	1.91e-07
Potra000354g01377	542.917	740.29	345.543	0.466768	-1.09922	1.02e-12	5.02e-11
Potra001493g12472	609.829	831.241	388.416	0.467272	-1.09766	3.25e-11	1.32e-09
Potra002152g16650	631.922	861.317	402.527	0.467339	-1.09746	1.32e-18	1.28e-16
Potra001298g11179	26.0673	35.523	16.6115	0.467627	-1.09657	0.00211439	0.0161782
Potra000059g34983	36.6976	49.9889	23.4064	0.468231	-1.09471	0.000320812	0.00332098
Potra001652g13550	134.597	183.33	85.8637	0.468356	-1.09432	0.00134823	0.011133
Potra001104g09650	69.0277	93.9005	44.1549	0.470231	-1.08856	0.0016258	0.0130008
Potra001016g08464	32.9658	44.8412	21.0904	0.470335	-1.08824	0.00767877	0.0457211
Potra000736g05804	187.478	255.014	119.942	0.470335	-1.08824	1.19e-10	4.44e-09
Potra003644g22269	24.226	32.9515	15.5005	0.470403	-1.08803	0.00311274	0.0223484
Potra003812g22952	40.6105	55.2322	25.9889	0.470538	-1.08762	0.000782915	0.00702554
Potra002559g19285	28.0967	38.2096	17.9837	0.47066	-1.08724	0.00705438	0.0429024
Potra000849g06856	81.2461	110.46	52.0322	0.47105	-1.08605	1.11e-05	0.000174874
Potra000265g01006	28.3225	38.5042	18.1408	0.471138	-1.08578	0.00364444	0.0254218
Potra001488g12417	31.8773	43.327	20.4276	0.471475	-1.08475	0.000981588	0.00850404
Potra000740g05836	29.6258	40.257	18.9946	0.471832	-1.08365	0.00168142	0.0133802
Potra003197g20977	485.797	659.97	311.623	0.472177	-1.0826	1.03e-06	2.07e-05
Potra002193g16904	274.296	372.511	176.08	0.472683	-1.08105	1.02e-12	5.02e-11
Potra002240g17218	231.859	314.845	148.873	0.472846	-1.08056	2.59e-11	1.07e-09
Potra000785g06221	98.8666	134.252	63.4817	0.472856	-1.08053	2.42e-07	5.49e-06
Potra000700g05450	78.3781	106.423	50.3334	0.472957	-1.08022	5.7e-07	1.21e-05
Potra000715g05595	47.138	64.0008	30.2751	0.473043	-1.07996	0.000349043	0.00357073
Potra001488g12418	91.9853	124.871	59.0991	0.47328	-1.07923	2.14e-07	4.91e-06
Potra001323g11351	1177.91	1598.93	756.9	0.47338	-1.07893	4.28e-22	5.51e-20
Potra000396g01850	59.4961	80.7419	38.2503	0.473735	-1.07785	1.45e-05	0.000221784
Potra001324g11365	931.696	1264.38	599.015	0.473763	-1.07776	9.81e-18	8.64e-16
Potra002241g17223	98.6661	133.896	63.4367	0.473777	-1.07772	0.000368839	0.00374571
Potra000598g04545	234.652	318.436	150.868	0.473779	-1.07771	1.56e-11	6.58e-10
Potra002277g17459	388.358	527.014	249.701	0.473803	-1.07764	3.28e-09	1.01e-07
Potra003367g21465	864.94	1173.73	556.154	0.473836	-1.07754	1.28e-20	1.46e-18
Potra167218g27265	109.051	147.979	70.1224	0.473867	-1.07745	1.66e-07	3.87e-06
Potra002497g18859	299.062	405.582	192.542	0.474731	-1.07482	3.03e-05	0.000422314
Potra001534g12737	131.388	178.169	84.6082	0.474877	-1.07437	6.57e-07	1.38e-05
Potra002637g19627	65.1003	88.2614	41.9392	0.475171	-1.07348	5.89e-05	0.000760394
Potra001355g30770	250.368	339.31	161.425	0.475743	-1.07175	4.6e-06	8e-05
Potra000958g07870	142.436	192.977	91.8953	0.476197	-1.07037	2e-05	0.000293088
Potra001463g12296	282.508	382.747	182.269	0.476213	-1.07032	8.71e-11	3.3e-09
Potra000991g08202	63.1418	85.5382	40.7454	0.476341	-1.06993	0.00434085	0.0292434
Potra001542g12787	388.812	526.601	251.022	0.476683	-1.0689	1.46e-12	7.13e-11
Potra000475g02883	54.3257	73.5725	35.079	0.476795	-1.06856	5.71e-05	0.00073981
Potra003895g23389	301.483	408.106	194.86	0.477476	-1.0665	9.83e-13	4.89e-11
Potra200155g29473	68.7605	93.0708	44.4501	0.477594	-1.06614	1.56e-05	0.00023613
Potra004137g24608	46.9691	63.5628	30.3753	0.477879	-1.06528	0.00313749	0.0224859
Potra001342g11516	58.5059	79.1528	37.859	0.478302	-1.064	3.09e-05	0.000430254
Potra001972g15547	41.0251	55.501	26.5491	0.478355	-1.06385	0.0068713	0.0419911
Potra002507g18931	59.9554	81.0916	38.8191	0.478707	-1.06279	0.000251443	0.00269925
Potra003903g23434	80.8983	109.415	52.3818	0.478745	-1.06267	4.64e-06	8.07e-05
Potra001205g10409	45.4636	61.4838	29.4434	0.47888	-1.06226	0.00175934	0.0139247
Potra188231g28578	34.6711	46.8853	22.457	0.478979	-1.06197	0.000972371	0.00844173
Potra165169g27207	385.96	521.884	250.037	0.479103	-1.06159	1.35e-07	3.18e-06
Potra000592g04487	953.781	1289.52	618.041	0.479279	-1.06106	5.18e-13	2.66e-11
Potra006777g25793	65.8193	88.9876	42.6509	0.479291	-1.06103	2.04e-05	0.000299194
Potra002534g19093	23.0727	31.1933	14.9521	0.479337	-1.06089	0.00583571	0.036944
Potra002386g18173	213.031	287.933	138.128	0.479721	-1.05973	0.000755443	0.00681807
Potra003836g23057	36.0882	48.7323	23.4441	0.48108	-1.05565	0.00070821	0.00647634
Potra000902g07326	1161.81	1568.82	754.805	0.481129	-1.0555	5.05e-09	1.51e-07
Potra001572g13022	90.4709	122.153	58.7883	0.481266	-1.05509	4.64e-07	9.98e-06
Potra000586g04383	77.4158	104.493	50.3389	0.481745	-1.05366	1.62e-05	0.000242749
Potra002306g17595	1185.14	1598.88	771.396	0.482462	-1.05151	1.1e-20	1.27e-18
Potra162822g27041	60.0652	81.027	39.1033	0.482596	-1.05111	5.78e-05	0.000747667
Potra002594g31951	440.295	593.647	286.944	0.483358	-1.04884	7.89e-15	4.97e-13
Potra000997g08299	359.784	485.092	234.476	0.483364	-1.04882	3.37e-09	1.04e-07
Potra002590g19479	2701.99	3642.52	1761.46	0.483584	-1.04816	1.69e-16	1.31e-14
Potra000431g02284	401.117	540.708	261.526	0.483672	-1.0479	2.37e-15	1.6e-13
Potra001832g14747	53.5249	72.1365	34.9133	0.48399	-1.04695	3.86e-05	0.000522277
Potra002605g19549	485.479	653.691	317.268	0.485348	-1.04291	8.85e-16	6.17e-14
Potra003729g22605	38.3316	51.6063	25.0569	0.48554	-1.04234	0.00592578	0.0373867
Potra000616g04690	74.6077	100.428	48.7876	0.485797	-1.04157	6.8e-05	0.000862974
Potra000849g06857	686.075	923.355	448.795	0.486048	-1.04083	1.13e-17	9.88e-16
Potra003967g23823	115.185	155.015	75.3557	0.486118	-1.04062	4.2e-07	9.1e-06
Potra002210g17020	132.692	178.554	86.8295	0.486292	-1.0401	7.49e-08	1.84e-06
Potra001501g12519	78.8467	106.086	51.6077	0.486472	-1.03957	1.67e-05	0.000250206
Potra001695g13852	30.9944	41.7003	20.2886	0.486533	-1.03939	0.00746511	0.0447649
Potra001056g09040	319.772	430.154	209.39	0.486779	-1.03866	1.2e-09	3.92e-08
Potra000771g06081	29.7954	40.0755	19.5153	0.486964	-1.03811	0.00824375	0.0484631
Potra002373g18081	297.974	400.736	195.213	0.487135	-1.03761	4.33e-13	2.24e-11
Potra000477g02910	23.0586	31.0041	15.1131	0.487455	-1.03666	0.00798215	0.0471844
Potra168419g27366	329.949	443.638	216.26	0.48747	-1.03661	1.77e-13	9.52e-12
Potra002210g17018	62.2095	83.6397	40.7792	0.487558	-1.03635	4.88e-05	0.000640962
Potra000242g00958	33.6039	45.1673	22.0404	0.487971	-1.03513	0.00117343	0.00988903
Potra001319g11318	21427.2	28795.6	14058.9	0.488232	-1.03436	3.35e-15	2.2e-13
Potra001569g12976	162.784	218.706	106.862	0.488612	-1.03324	2.15e-05	0.000312787
Potra001884g15004	37.651	50.5835	24.7184	0.488667	-1.03308	0.00320479	0.0228858
Potra002894g20250	256.534	344.573	168.495	0.488998	-1.0321	3.31e-10	1.17e-08
Potra001073g09263	26.5806	35.6966	17.4646	0.48925	-1.03136	0.00364339	0.0254218
Potra003741g22657	24.1077	32.3748	15.8406	0.489287	-1.03125	0.00796562	0.0471194
Potra002248g17269	51.3875	69.0043	33.7708	0.489401	-1.03091	0.00117095	0.00987787
Potra001782g14496	30.8841	41.4701	20.2981	0.489465	-1.03072	0.00113424	0.00961648
Potra000441g02436	33.4598	44.9251	21.9946	0.489585	-1.03037	0.00448183	0.0300039
Potra003749g22680	98.3929	132.057	64.7291	0.490161	-1.02867	6.87e-06	0.000115007
Potra004003g24107	28.7231	38.5462	18.8999	0.490317	-1.02821	0.00378382	0.0262267
Potra003748g22676	62.4092	83.7171	41.1012	0.490954	-1.02634	5.25e-05	0.0006852
Potra170840g27550	47.0846	63.1508	31.0184	0.49118	-1.02568	0.000191759	0.00214369
Potra001111g09750	286.823	384.655	188.991	0.491325	-1.02525	7.11e-12	3.18e-10
Potra001280g11048	55.6081	74.559	36.6572	0.491653	-1.02429	0.000298808	0.00312692
Potra001031g08653	41.7281	55.942	27.5142	0.491835	-1.02375	0.000403251	0.00404064
Potra003531g21922	193.316	259.133	127.499	0.492023	-1.0232	2.94e-10	1.05e-08
Potra000927g07528	56.7002	75.9858	37.4146	0.49239	-1.02213	0.000140782	0.00163216
Potra000404g01935	158.685	212.658	104.713	0.492402	-1.02209	4.25e-09	1.29e-07
Potra001655g13583	850.768	1140.06	561.48	0.492502	-1.0218	1.5e-18	1.43e-16
Potra003809g22942	50.8427	68.1049	33.5805	0.49307	-1.02013	0.000245713	0.00265103
Potra001361g11641	1008.68	1351.12	666.236	0.493099	-1.02005	1.07e-18	1.05e-16
Potra003787g22861	91.9075	123.072	60.7428	0.493554	-1.01872	3.46e-06	6.2e-05
Potra000950g07784	277.169	371.141	183.198	0.493608	-1.01856	1.03e-11	4.45e-10
Potra001160g10067	225.05	301.242	148.857	0.494143	-1.017	7.74e-11	2.97e-09
Potra003756g22712	351.762	470.779	232.745	0.494383	-1.0163	1.35e-12	6.59e-11
Potra199507g29406	33.2407	44.4868	21.9946	0.494408	-1.01623	0.00200018	0.0154701
Potra004011g24203	535.115	715.927	354.303	0.494886	-1.01483	3.75e-16	2.75e-14
Potra001042g08825	28.5917	38.2519	18.9314	0.494915	-1.01475	0.00737951	0.0443759
Potra000832g06672	30.5139	40.8221	20.2058	0.494971	-1.01458	0.00517965	0.0336164
Potra178896g27978	39.4142	52.7235	26.1048	0.495127	-1.01413	0.00444973	0.0298405
Potra002348g17928	48.9447	65.4434	32.4459	0.495785	-1.01221	0.000164791	0.00187689
Potra001123g09906	108.475	145.031	71.9193	0.495888	-1.01191	2.66e-07	6.02e-06
Potra001981g15599	64.2917	85.9498	42.6335	0.496028	-1.01151	2.58e-05	0.000367011
Potra003170g20890	1322.35	1767.24	877.468	0.496519	-1.01008	5.95e-08	1.5e-06
Potra001703g13896	28.3738	37.9125	18.8352	0.496806	-1.00924	0.00349194	0.0245149
Potra003375g21485	828.801	1107.03	550.576	0.497347	-1.00768	4.11e-08	1.07e-06
Potra000847g06831	311.675	416.208	207.143	0.497691	-1.00668	3.85e-12	1.78e-10
Potra001763g14344	686.504	916.136	456.872	0.498695	-1.00377	1.96e-05	0.000288931
Potra002322g17754	62.8164	83.7899	41.8429	0.499379	-1.00179	0.000445018	0.00440367
Potra004010g24185	318.11	424.145	212.075	0.500006	-0.999983	2.95e-12	1.38e-10
Potra000594g04503	615.184	820.123	410.245	0.500224	-0.999353	2.73e-07	6.15e-06
Potra000511g03373	37.6372	50.1551	25.1193	0.500833	-0.997599	0.00109448	0.00931968
Potra002231g17147	63.1374	84.1257	42.1491	0.501026	-0.997043	4.1e-05	0.000551888
Potra002180g16810	120.665	160.735	80.595	0.501416	-0.995921	3.39e-07	7.49e-06
Potra001536g12748	197.945	263.636	132.255	0.501658	-0.995225	8.52e-10	2.85e-08
Potra173766g27671	72.1109	96.0143	48.2076	0.502088	-0.993988	9.16e-05	0.00112015
Potra003303g21292	298.467	397.345	199.589	0.502306	-0.99336	4.58e-11	1.82e-09
Potra003257g21144	35.5873	47.3747	23.8	0.502378	-0.993156	0.00201447	0.0155461
Potra001263g10914	737.745	982.062	493.428	0.502441	-0.992974	8.04e-17	6.39e-15
Potra000294g01074	49.7633	66.2081	33.3186	0.503241	-0.990678	0.000438933	0.00435274
Potra000203g00873	468.246	622.939	313.552	0.503343	-0.990387	6.66e-14	3.77e-12
Potra003837g23059	155.075	206.288	103.861	0.503474	-0.99001	1.85e-05	0.000273098
Potra001086g09422	58.3838	77.6635	39.104	0.503506	-0.989919	0.000426952	0.00424906
Potra004268g24757	229.103	304.723	153.483	0.503681	-0.989419	6.23e-10	2.13e-08
Potra002104g16360	79.8017	106.126	53.4778	0.50391	-0.988763	9.46e-06	0.000153106
Potra003815g22964	67.6664	89.9761	45.3567	0.504097	-0.988227	0.000747231	0.0067598
Potra003346g21409	33.8981	45.0503	22.7459	0.5049	-0.985931	0.0011572	0.00978785
Potra001167g10122	639.624	849.876	429.371	0.505216	-0.985027	3.33e-15	2.2e-13
Potra001699g13876	124.657	165.52	83.7939	0.506245	-0.982092	2.95e-05	0.00041262
Potra002580g31940	48.1432	63.9195	32.367	0.506372	-0.981732	0.000478773	0.00467619
Potra000039g00188	27.747	36.8378	18.6561	0.506438	-0.981543	0.00614864	0.0385394
Potra000582g04348	1656.6	2199.21	1113.98	0.506538	-0.981257	1.78e-19	1.85e-17
Potra009332g26339	641.182	851.057	431.307	0.50679	-0.98054	9.75e-16	6.71e-14
Potra003952g23730	33.6733	44.6931	22.6535	0.506868	-0.980319	0.00261101	0.0193092
Potra000961g07901	1911.83	2536.3	1287.36	0.507573	-0.978313	7.57e-15	4.8e-13
Potra000636g04858	115.446	153.144	77.7473	0.507673	-0.97803	2.79e-06	5.11e-05
Potra000786g06227	87.372	115.887	58.8569	0.507882	-0.977434	3.94e-06	6.97e-05
Potra196759g29160	39.579	52.4928	26.6651	0.507976	-0.977167	0.00353151	0.0247428
Potra182478g28226	870.714	1154.67	586.756	0.508158	-0.976651	1.28e-14	7.86e-13
Potra001270g34046	31.1445	41.2965	20.9925	0.508336	-0.976147	0.00422707	0.0286568
Potra008583g26189	151.453	200.777	102.128	0.508665	-0.975211	1.84e-07	4.26e-06
Potra002024g15855	95.6976	126.814	64.5808	0.509255	-0.973541	7.84e-06	0.000129166
Potra002423g18413	1210.65	1603.98	817.315	0.509553	-0.972696	8.99e-10	3e-08
Potra185075g28355	260.353	344.811	175.895	0.510121	-0.971089	4.14e-06	7.3e-05
Potra002744g19890	61.7685	81.8038	41.7332	0.510162	-0.970973	0.00229933	0.0173594
Potra000479g02933	59.7524	79.0933	40.4115	0.510935	-0.968789	0.000203896	0.00226122
Potra000914g07410	100.051	132.425	67.6772	0.511061	-0.968432	0.00470745	0.0312737
Potra002489g18814	108.019	142.951	73.087	0.511274	-0.967833	3.07e-06	5.56e-05
Potra000833g06683	293.768	388.751	198.784	0.51134	-0.967646	3.83e-11	1.54e-09
Potra154203g26742	28.8559	38.1845	19.5272	0.51139	-0.967504	0.00395699	0.0271565
Potra008831g26235	66.3071	87.7081	44.9061	0.511995	-0.965799	0.00627299	0.03909
Potra001789g14526	2241.22	2964.27	1518.17	0.512156	-0.965343	2.18e-20	2.43e-18
Potra003966g23814	49.9222	66.0161	33.8282	0.512424	-0.964591	0.00389796	0.0268175
Potra001632g13416	420.638	556.167	285.11	0.512633	-0.964001	3.44e-05	0.000471833
Potra000797g06326	98.1429	129.742	66.5433	0.512888	-0.963286	1.96e-05	0.000288415
Potra010222g26527	382.033	504.956	259.109	0.513132	-0.962599	9.28e-12	4.06e-10
Potra003767g35391	27.3208	36.111	18.5305	0.513155	-0.962532	0.00414365	0.0282011
Potra001695g13849	55.3944	73.2148	37.574	0.513203	-0.962398	0.000506229	0.00488606
Potra002328g17807	1516.45	2004.17	1028.74	0.513299	-0.962129	2.42e-15	1.62e-13
Potra001661g13636	696.83	920.682	472.977	0.513724	-0.960933	3.23e-16	2.39e-14
Potra001483g12391	41.5831	54.9379	28.2283	0.513822	-0.960661	0.00275102	0.0201945
Potra003782g32357	1144.39	1511.52	777.255	0.514222	-0.959537	3.07e-17	2.56e-15
Potra003442g21677	69.9092	92.3322	47.4863	0.514299	-0.959321	9.34e-05	0.00113877
Potra001586g13115	1213.04	1602.07	824.009	0.51434	-0.959205	7.8e-18	6.91e-16
Potra001001g08332	84.2665	111.288	57.2449	0.514384	-0.959082	1.59e-05	0.00023991
Potra002031g15898	805.108	1063.12	547.094	0.51461	-0.958447	4.11e-16	2.99e-14
Potra000843g06798	52.7772	69.6714	35.883	0.515033	-0.957264	0.000429972	0.00426871
Potra181369g28150	53.866	71.1079	36.624	0.515049	-0.957219	0.00458373	0.030612
Potra001741g31197	107.206	141.503	72.9087	0.515243	-0.956675	4.21e-06	7.4e-05
Potra000839g06764	84.7961	111.883	57.7089	0.515795	-0.955131	1.51e-05	0.000229821
Potra002545g19167	269.712	355.74	183.683	0.516342	-0.953602	5.37e-08	1.37e-06
Potra000471g02841	334.455	440.925	227.986	0.517064	-0.951585	1.19e-08	3.36e-07
Potra000957g07856	459.538	605.696	313.38	0.517389	-0.950679	1.42e-11	6.03e-10
Potra000003g00024	74.5726	98.2792	50.866	0.517566	-0.950184	4.92e-05	0.000645358
Potra001673g13730	104.038	137.049	71.0267	0.518259	-0.948254	1.61e-05	0.000242749
Potra003697g22475	61.7371	81.3228	42.1514	0.518322	-0.948078	0.00155866	0.0125541
Potra000931g07591	59.3753	78.2096	40.541	0.518363	-0.947965	0.000232297	0.00252488
Potra003055g20635	51.6052	67.9704	35.24	0.51846	-0.947695	0.00024912	0.00267948
Potra000444g02476	1089.4	1434.23	744.564	0.519138	-0.945811	9.49e-12	4.14e-10
Potra001206g10442	94.2367	124.057	64.4159	0.519243	-0.945519	7.26e-06	0.000120964
Potra001049g08925	1168.07	1537.39	798.748	0.519548	-0.944671	3.48e-17	2.87e-15
Potra009107g26289	278.734	366.812	190.656	0.519766	-0.944066	7.92e-08	1.94e-06
Potra197473g30288	257.626	338.994	176.258	0.519945	-0.943569	3.82e-09	1.17e-07
Potra001819g14677	130.089	171.16	89.0184	0.520089	-0.943171	5.48e-07	1.17e-05
Potra000945g07741	1044.23	1373.88	714.588	0.520124	-0.943071	8.39e-15	5.26e-13
Potra000967g07962	84.6869	111.413	57.9605	0.52023	-0.94278	6.83e-05	0.000865989
Potra000529g03661	685.528	901.845	469.211	0.520279	-0.942642	5.53e-15	3.57e-13
Potra002187g16852	41.8543	55.0439	28.6646	0.520759	-0.941312	0.00144166	0.0117995
Potra162945g27052	290.238	381.614	198.862	0.521108	-0.940347	2.86e-10	1.02e-08
Potra002463g18662	94.7628	124.576	64.9493	0.521361	-0.939645	6.41e-06	0.000108274
Potra004866g25198	903.603	1187.82	619.383	0.521444	-0.939417	2.49e-12	1.17e-10
Potra000458g02656	78.9237	103.741	54.1067	0.521556	-0.939105	3.28e-05	0.000452912
Potra001274g11007	117.707	154.684	80.73	0.521904	-0.938144	0.00260115	0.0192415
Potra004466g24952	150.433	197.668	103.199	0.522083	-0.937649	1.17e-07	2.8e-06
Potra002576g19378	304.539	400.124	208.954	0.522224	-0.937259	1.55e-08	4.29e-07
Potra000889g07183	693.059	909.672	476.446	0.523756	-0.933032	2.69e-14	1.6e-12
Potra003290g21251	308.965	405.515	212.415	0.523816	-0.932867	8.66e-08	2.1e-06
Potra001735g14134	62.962	82.6299	43.294	0.523951	-0.932496	7.55e-05	0.000944599
Potra000687g05336	114.157	149.807	78.507	0.524055	-0.932209	6.65e-06	0.000111781
Potra003159g20870	30.3634	39.8449	20.882	0.524083	-0.932133	0.00761213	0.0454604
Potra001073g09270	63.565	83.4137	43.7162	0.524089	-0.932117	0.000171168	0.0019392
Potra155924g26781	326.267	428.14	224.393	0.524112	-0.932054	2.88e-09	8.95e-08
Potra001651g13547	62.4125	81.8907	42.9342	0.524287	-0.93157	0.000141865	0.00164402
Potra001797g31274	269.125	353.105	185.145	0.524334	-0.931441	1.56e-09	5.04e-08
Potra001861g14895	1312.76	1722.06	903.464	0.524641	-0.930597	4.78e-11	1.89e-09
Potra001226g10555	1381.81	1812.54	951.079	0.524723	-0.930373	6.01e-17	4.83e-15
Potra000743g05864	491.427	644.56	338.295	0.524846	-0.930034	1.65e-12	8e-11
Potra001774g14447	188.616	247.291	129.941	0.525459	-0.92835	1.15e-06	2.28e-05
Potra002911g20289	658.744	863.36	454.128	0.526002	-0.926861	4.18e-14	2.42e-12
Potra001342g11500	1039.77	1362.04	717.488	0.526773	-0.924747	2.28e-10	8.23e-09
Potra002170g16752	110.394	144.603	76.1857	0.52686	-0.924507	1.8e-05	0.000266723
Potra004281g24773	122.042	159.799	84.2848	0.527441	-0.922918	1.36e-06	2.67e-05
Potra000140g00485	57.9657	75.89	40.0415	0.527626	-0.922414	0.000166569	0.00189326
Potra001633g13427	113.463	148.543	78.3825	0.527677	-0.922274	2.39e-06	4.43e-05
Potra003332g21380	430.394	563.357	297.431	0.527963	-0.921492	2.6e-11	1.07e-09
Potra002124g16470	101.818	133.272	70.3639	0.527974	-0.921461	4.5e-06	7.85e-05
Potra001353g11599	79.1098	103.539	54.681	0.528121	-0.921058	0.00436302	0.0293639
Potra000972g08020	142.055	185.854	98.256	0.528672	-0.919554	9.92e-07	2e-05
Potra001548g12828	110.223	144.147	76.2994	0.529318	-0.917794	0.00183489	0.0144323
Potra001999g15694	66.4171	86.8518	45.9824	0.529435	-0.917475	0.000101451	0.00122251
Potra002580g19394	319.897	418.319	221.475	0.529441	-0.917457	3.27e-11	1.33e-09
Potra001525g12683	382.963	500.776	265.15	0.529478	-0.917356	4.72e-07	1.02e-05
Potra000353g01324	57.1032	74.6699	39.5365	0.529484	-0.917342	0.000307169	0.00319879
Potra004238g24715	1066.72	1394.38	739.062	0.530031	-0.915852	2.61e-15	1.75e-13
Potra006571g25718	107.744	140.832	74.6566	0.530112	-0.91563	2.08e-06	3.91e-05
Potra002667g19708	95.8887	125.33	66.447	0.530175	-0.915459	6.99e-06	0.000116797
Potra000636g04859	408.183	533.488	282.877	0.530241	-0.915281	1.62e-11	6.83e-10
Potra000435g02365	71.647	93.6235	49.6706	0.530535	-0.914479	2.95e-05	0.00041262
Potra000174g00653	776.115	1014.11	538.116	0.530626	-0.914232	1.03e-09	3.42e-08
Potra001205g10419	54.2278	70.85	37.6056	0.530777	-0.913821	0.00663176	0.0409316
Potra001163g10102	107.584	140.53	74.6383	0.531119	-0.912892	6.84e-06	0.000114619
Potra003839g23069	502.516	656.285	348.747	0.531396	-0.91214	1.09e-06	2.19e-05
Potra000025g00125	94.2645	123.083	65.4464	0.531728	-0.911239	2.33e-05	0.000335358
Potra002176g16788	54.8701	71.6334	38.1067	0.531968	-0.910589	0.00048537	0.00472405
Potra005649g25458	1386.54	1810.1	962.969	0.531996	-0.910511	1.37e-09	4.46e-08
Potra004350g24838	1050.24	1370.51	729.97	0.532625	-0.908809	7.14e-08	1.76e-06
Potra000974g08068	32.9204	42.9592	22.8815	0.532634	-0.908783	0.00800001	0.0472698
Potra001623g13350	232.498	303.373	161.623	0.532754	-0.908458	5.59e-09	1.66e-07
Potra002104g16356	113.666	148.253	79.0785	0.533401	-0.906707	6.08e-06	0.000103515
Potra175858g27835	519.714	677.85	361.578	0.533418	-0.90666	1.34e-10	4.95e-09
Potra001018g08493	151.059	197.013	105.105	0.533492	-0.906461	9.52e-07	1.93e-05
Potra003375g21486	516.219	673.101	359.338	0.533855	-0.90548	1.04e-09	3.45e-08
Potra191712g28766	186.238	242.828	129.648	0.533911	-0.90533	1.23e-07	2.92e-06
Potra000490g03095	102.745	133.958	71.5319	0.533989	-0.905119	0.000225751	0.00246335
Potra002035g15909	825.953	1076.7	575.211	0.534237	-0.904449	5.53e-13	2.83e-11
Potra002099g16330	101.26	131.998	70.521	0.534257	-0.904395	1.04e-05	0.000166184
Potra001413g11984	146.962	191.55	102.373	0.534449	-0.903877	6.31e-07	1.32e-05
Potra003114g20769	1042.38	1358.59	726.176	0.534508	-0.903717	7.32e-14	4.12e-12
Potra001448g12195	28.4447	37.0711	19.8183	0.534604	-0.903459	0.00761822	0.0454773
Potra198817g29360	481.668	627.654	335.682	0.53482	-0.902876	7.22e-06	0.000120395
Potra002279g17471	440.966	574.379	307.553	0.535453	-0.901169	1.77e-11	7.43e-10
Potra002272g17420	41.3935	53.9141	28.873	0.535537	-0.900942	0.00170921	0.0135626
Potra001824g14710	23.3264	30.3821	16.2707	0.535537	-0.900941	0.00755739	0.0451918
Potra007535g25986	77.4534	100.82	54.087	0.536472	-0.898425	5.96e-05	0.000766723
Potra000618g04695	33.5483	43.6526	23.4441	0.537062	-0.89684	0.00764599	0.045601
Potra001691g13826	115.8	150.664	80.9367	0.537201	-0.896465	1.29e-05	0.000200557
Potra000571g04227	164.568	214.107	115.029	0.537249	-0.896338	3.93e-07	8.57e-06
Potra001698g13871	361.607	470.364	252.85	0.537564	-0.895493	6.9e-08	1.71e-06
Potra001663g13664	670.57	872.24	468.901	0.537583	-0.89544	1.65e-13	8.91e-12
Potra000698g05436	35.5782	46.2627	24.8936	0.538092	-0.894074	0.00515985	0.0335348
Potra002326g17790	43.3541	56.3722	30.3359	0.538136	-0.893956	0.00170302	0.0135212
Potra010112g26489	1698.59	2208.59	1188.59	0.538166	-0.893878	9.36e-05	0.00114048
Potra003991g24036	322.84	419.771	225.91	0.538174	-0.893855	7.96e-06	0.000130772
Potra187320g28496	80.5814	104.76	56.403	0.538403	-0.893242	3.34e-05	0.000460806
Potra001285g11083	103.276	134.252	72.2987	0.538529	-0.892905	7.91e-06	0.000130165
Potra003767g22767	157.14	204.244	110.035	0.538746	-0.892324	1.4e-06	2.72e-05
Potra000180g00716	37.6849	48.9785	26.3914	0.538835	-0.892084	0.00286638	0.0208925
Potra010199g26520	86.5696	112.489	60.6504	0.539168	-0.891192	3.76e-05	0.000510626
Potra000351g01293	797.085	1035.63	558.54	0.539325	-0.890774	2.65e-08	7.06e-07
Potra170475g27521	256.724	333.533	179.915	0.539421	-0.890516	4.95e-05	0.000649295
Potra002175g16776	336.409	437.055	235.762	0.539434	-0.890482	3.42e-10	1.2e-08
Potra002601g19532	34.2208	44.4546	23.987	0.539585	-0.890078	0.00213576	0.0163058
Potra002406g18303	331.795	430.942	232.649	0.539861	-0.889341	2.75e-10	9.83e-09
Potra002510g18941	30.1227	39.1235	21.1219	0.539878	-0.889295	0.00835059	0.0489362
Potra003399g21557	49.5882	64.4043	34.772	0.539902	-0.889231	0.00168033	0.0133754
Potra000469g02809	42.4597	55.1439	29.7756	0.539963	-0.889067	0.00407191	0.0277672
Potra001110g09736	657.26	853.596	460.923	0.539978	-0.889027	3.11e-13	1.64e-11
Potra000793g06288	537.089	697.52	376.658	0.539995	-0.888982	7.65e-11	2.94e-09
Potra000349g35458	202.4	262.853	141.947	0.540025	-0.888903	7.55e-08	1.85e-06
Potra000426g02245	82.0172	106.5	57.5344	0.540229	-0.888356	0.00138445	0.0113983
Potra000358g01439	493.719	641.057	346.381	0.540327	-0.888095	5.01e-12	2.28e-10
Potra174779g27751	102.315	132.835	71.7953	0.540484	-0.887676	0.000178663	0.00201428
Potra000033g00170	84.0379	109.075	59.0006	0.540916	-0.886523	2.8e-05	0.000395187
Potra194552g31515	2016.23	2615.4	1417.06	0.541815	-0.884128	7.19e-17	5.75e-15
Potra002216g17061	244.286	316.858	171.713	0.541925	-0.883836	1.29e-09	4.22e-08
Potra006836g25828	234.531	304.098	164.964	0.54247	-0.882385	3.09e-05	0.000430254
Potra003687g22443	47.0607	61.011	33.1103	0.542694	-0.88179	0.00403707	0.0275837
Potra007905g26055	37.8699	49.0888	26.6509	0.542913	-0.881207	0.00495233	0.0324589
Potra001248g10743	188.109	243.831	132.388	0.542952	-0.881103	6.15e-07	1.29e-05
Potra000452g02561	96.5644	125.136	67.9928	0.543351	-0.880044	2.44e-05	0.000350011
Potra000531g03706	45.9949	59.6032	32.3867	0.543372	-0.879988	0.0034314	0.0242305
Potra169834g27474	591.361	766.227	416.496	0.543568	-0.879469	0.00583347	0.0369421
Potra002532g19085	719.302	931.311	507.293	0.544708	-0.876444	1.14e-12	5.61e-11
Potra001154g10028	189.726	245.601	133.85	0.544987	-0.875707	2.26e-07	5.15e-06
Potra174512g27727	141.742	183.482	100.001	0.545019	-0.87562	8.49e-05	0.00104668
Potra001218g10530	131.939	170.752	93.1263	0.545388	-0.874644	0.00149195	0.0121043
Potra000613g04664	164.888	213.347	116.428	0.545723	-0.873759	1.02e-06	2.06e-05
Potra001858g14883	40.9565	52.9911	28.9219	0.545788	-0.873588	0.00267087	0.01971
Potra000997g08293	587.49	760.105	414.876	0.545814	-0.873517	1.68e-12	8.09e-11
Potra002477g18741	2430.21	3143.83	1716.58	0.546016	-0.872986	3.44e-13	1.8e-11
Potra003251g21133	45.4623	58.8087	32.1159	0.546108	-0.872741	0.00259574	0.019227
Potra000081g00285	231.857	299.894	163.819	0.546257	-0.872349	1.17e-05	0.000184511
Potra002483g18777	123.333	159.522	87.1451	0.54629	-0.87226	0.000252083	0.00270509
Potra000427g02250	2342.55	3029.25	1655.86	0.546624	-0.87138	1.08e-16	8.43e-15
Potra001524g12678	98.7746	127.72	69.829	0.546734	-0.871089	4.09e-05	0.000550556
Potra179435g28016	78.8969	102.013	55.7812	0.546806	-0.870899	0.000488884	0.00475326
Potra003903g23436	181.511	234.687	128.336	0.546841	-0.870806	1.36e-07	3.2e-06
Potra004017g24250	97.652	126.257	69.0469	0.546875	-0.870716	0.000459857	0.00452878
Potra001631g13410	40.6313	52.5333	28.7294	0.546879	-0.870707	0.00607032	0.0381516
Potra000836g06722	126.103	163.039	89.1659	0.546898	-0.870656	0.00408102	0.0278056
Potra160510g26863	145.2	187.653	102.747	0.547539	-0.868967	3.51e-07	7.71e-06
Potra002249g17289	121.152	156.523	85.78	0.548034	-0.867663	5.64e-06	9.64e-05
Potra000945g07747	60.4828	78.1373	42.8284	0.548118	-0.867443	0.00059068	0.00558308
Potra004578g25086	48.1203	62.1449	34.0958	0.54865	-0.866043	0.00128679	0.0106955
Potra002124g16474	78.2175	101.007	55.4276	0.548748	-0.865783	0.00583047	0.0369389
Potra003747g22673	41.8538	54.0464	29.6613	0.548811	-0.865618	0.00311909	0.0223828
Potra001645g13488	44.9082	57.99	31.8264	0.548826	-0.865579	0.00348078	0.0244798
Potra004115g24527	458.163	591.6	324.727	0.548896	-0.865395	2.46e-11	1.02e-09
Potra000678g05258	464.007	599.059	328.955	0.549119	-0.864809	1.09e-10	4.09e-09
Potra179726g28044	46.3607	59.8509	32.8704	0.549205	-0.864584	0.00448452	0.0300083
Potra003137g20823	50.4654	65.1464	35.7845	0.549293	-0.864351	0.000740307	0.00671244
Potra002321g17703	139.693	180.241	99.1452	0.55007	-0.862313	3.74e-06	6.65e-05
Potra000613g04665	893.424	1152.72	634.125	0.55011	-0.862207	1.22e-06	2.43e-05
Potra179937g28056	492.617	635.505	349.729	0.550316	-0.861668	7.43e-11	2.86e-09
Potra000423g02206	1059.21	1366.34	752.079	0.550433	-0.86136	1.56e-12	7.59e-11
Potra004133g24578	45.3189	58.4476	32.1902	0.550754	-0.860521	0.00168217	0.0133824
Potra005177g25308	191.49	246.949	136.031	0.550846	-0.860279	0.000231043	0.00251224
Potra000921g07466	73.6005	94.8996	52.3013	0.551122	-0.859556	0.000648788	0.00602591
Potra001461g12282	115.521	148.937	82.1046	0.551272	-0.859163	1.64e-05	0.000246355
Potra000549g03941	34.6008	44.5974	24.6041	0.551693	-0.858063	0.00592859	0.0373952
Potra001016g08473	352.01	453.698	250.322	0.551737	-0.857948	2.97e-10	1.05e-08
Potra000484g02988	45.7171	58.9039	32.5303	0.552261	-0.856578	0.00402701	0.0275351
Potra001270g10968	127.756	164.594	90.9193	0.552387	-0.856249	1.34e-05	0.000206233
Potra001181g10230	64.498	83.0932	45.9028	0.552425	-0.85615	0.000217653	0.00238621
Potra002209g17011	144.93	186.641	103.219	0.553034	-0.85456	2.32e-06	4.32e-05
Potra000626g04770	79.0933	101.822	56.3642	0.553554	-0.853204	0.000992698	0.00858693
Potra001034g08727	65.8828	84.8149	46.9507	0.553566	-0.853171	0.00020553	0.00227456
Potra006203g25609	101.463	130.613	72.3129	0.553644	-0.852969	0.000242436	0.00261771
Potra161077g26900	38.7489	49.8796	27.6183	0.5537	-0.852822	0.00555828	0.0356334
Potra001939g15353	137.721	177.278	98.163	0.553722	-0.852765	4.59e-06	8e-05
Potra001551g12856	52.9697	68.1594	37.7801	0.55429	-0.851287	0.00177051	0.0139971
Potra000786g06235	65.0834	83.7458	46.421	0.554309	-0.851237	0.000595214	0.00562211
Potra001319g11315	105.894	136.251	75.5371	0.554397	-0.851009	8.11e-06	0.000132952
Potra176723g27907	89.7529	115.471	64.0347	0.554552	-0.850606	0.00503182	0.0328716
Potra000913g07396	41.6925	53.637	29.748	0.554617	-0.850437	0.00588371	0.0371727
Potra002589g19467	112.96	145.315	80.6044	0.554689	-0.850249	0.00134686	0.011125
Potra001962g15494	109.34	140.602	78.0779	0.555311	-0.848633	2e-05	0.000293939
Potra003955g23747	86.0018	110.585	61.4191	0.555403	-0.848393	0.000110578	0.00131822
Potra001977g31564	87.1247	111.993	62.2561	0.555891	-0.847125	0.00272745	0.0200638
Potra004484g24973	92.2821	118.583	65.9814	0.556416	-0.845763	5.93e-05	0.000764697
Potra004002g24101	115.288	148.113	82.4621	0.556751	-0.844897	9.83e-06	0.00015833
Potra002038g15931	84.2415	108.224	60.2591	0.5568	-0.844768	7.31e-05	0.000917233
Potra000413g02048	35.6119	45.7486	25.4752	0.556852	-0.844635	0.0083071	0.0487224
Potra003849g23142	488.158	626.968	349.348	0.557202	-0.843729	6.56e-11	2.55e-09
Potra001319g11314	39.5567	50.8047	28.3088	0.557207	-0.843714	0.00454625	0.0303913
Potra003041g20603	118.433	152.102	84.7646	0.557289	-0.843502	0.000223718	0.00244404
Potra001334g11460	130.839	168.032	93.6455	0.557307	-0.843456	3.35e-06	6.03e-05
Potra001176g10185	266.175	341.83	190.52	0.557353	-0.843337	2.05e-08	5.54e-07
Potra001081g09350	370.194	475.406	264.982	0.55738	-0.843267	7.43e-10	2.53e-08
Potra000589g04447	133.401	171.305	95.4975	0.557469	-0.843035	5.39e-06	9.25e-05
Potra004135g24581	785.978	1009.16	562.8	0.557693	-0.842457	1.52e-12	7.42e-11
Potra001002g08342	551.589	708.132	395.046	0.557871	-0.841997	7.59e-11	2.92e-09
Potra004072g24437	64.913	83.3268	46.4992	0.558034	-0.841574	0.00035006	0.00357719
Potra000997g08300	41.6979	53.52	29.8758	0.558219	-0.841098	0.00839686	0.0491453
Potra003197g20976	115.708	148.488	82.9284	0.558485	-0.840409	0.000266254	0.00283529
Potra003987g24018	38.9594	49.9935	27.9253	0.558578	-0.84017	0.00492011	0.0322952
Potra001767g14368	80.0915	102.755	57.4278	0.558881	-0.839387	0.0003925	0.00394427
Potra001613g13292	255.907	328.285	183.529	0.559053	-0.838942	5.17e-08	1.32e-06
Potra001274g11008	135.609	173.915	97.3037	0.559489	-0.837817	0.00534232	0.0344313
Potra001103g09633	42.599	54.6318	30.5663	0.559496	-0.8378	0.00314177	0.0225108
Potra002088g16269	284.779	365.207	204.352	0.559549	-0.837662	1.54e-07	3.61e-06
Potra000586g04376	46.5545	59.6917	33.4172	0.55983	-0.836939	0.00478725	0.0316828
Potra001452g12208	822.599	1054.67	590.529	0.559919	-0.836709	1.03e-08	2.93e-07
Potra001824g14708	449.637	576.392	322.882	0.560178	-0.836044	7.94e-10	2.67e-08
Potra000997g08294	125.2	160.493	89.9069	0.560193	-0.836005	1.27e-05	0.000197064
Potra002461g18649	63.8466	81.8237	45.8696	0.560591	-0.83498	0.00196358	0.0152634
Potra000745g05874	275.684	353.286	198.081	0.560681	-0.834748	2.04e-08	5.54e-07
Potra188143g28567	60.709	77.7879	43.6302	0.560887	-0.834219	0.000669064	0.00617304
Potra001859g14892	67.7096	86.7216	48.6975	0.561538	-0.832543	0.00591537	0.0373379
Potra002154g16660	98.2441	125.813	70.6748	0.561742	-0.832019	8.8e-05	0.00108092
Potra000979g08092	55.8566	71.5298	40.1835	0.561773	-0.831941	0.00250361	0.0186438
Potra000538g03773	131.891	168.877	94.904	0.56197	-0.831435	0.000382251	0.00385799
Potra001393g11835	259.896	332.696	187.096	0.562364	-0.830425	3.43e-05	0.000471182
Potra000700g05455	60.2279	77.0963	43.3594	0.562406	-0.830316	0.00558141	0.0357405
Potra002371g18064	79.4997	101.764	57.2353	0.562431	-0.830251	0.000385774	0.00388932
Potra002041g15955	56.8291	72.7338	40.9245	0.562661	-0.829662	0.00229154	0.01731
Potra001256g10817	91.7095	117.371	66.0477	0.562724	-0.8295	6.75e-05	0.000858495
Potra003343g21403	89.8709	115.003	64.7386	0.562929	-0.828974	0.000102983	0.00123721
Potra176251g27870	67.3706	86.2031	48.5381	0.563067	-0.828622	0.00330193	0.023453
Potra000531g32953	711.269	910.077	512.461	0.563096	-0.828547	8.22e-07	1.69e-05
Potra175986g27849	610.407	781.005	439.808	0.563131	-0.828457	5.38e-11	2.11e-09
Potra000448g02512	44.4256	56.8362	32.0151	0.563286	-0.82806	0.0026911	0.0198436
Potra000365g35021	42.0645	53.7876	30.3414	0.564097	-0.825984	0.00476113	0.0315549
Potra001634g13447	162.326	207.554	117.097	0.564177	-0.82578	3.8e-05	0.000514718
Potra175317g27787	75.7274	96.8059	54.6489	0.56452	-0.824903	0.00382801	0.0264545
Potra003371g21477	45.3302	57.9375	32.7229	0.564796	-0.824199	0.00381658	0.0263946
Potra002453g18580	119.168	152.306	86.0288	0.56484	-0.824085	0.000323375	0.00334254
Potra001882g14990	333.008	425.606	240.41	0.564865	-0.824022	4.37e-07	9.43e-06
Potra001257g10843	106.73	136.403	77.0568	0.564922	-0.823877	2.89e-05	0.000406305
Potra000924g07477	132.951	169.904	95.9978	0.565012	-0.823647	1.53e-05	0.000231906
Potra004182g24668	233.481	298.331	168.63	0.565242	-0.823059	7.49e-07	1.55e-05
Potra000097g00324	67.6019	86.3673	48.8365	0.565451	-0.822525	0.00058281	0.00552182
Potra001020g08515	201.678	257.658	145.697	0.565468	-0.822481	5.18e-07	1.11e-05
Potra000554g03996	129.287	165.146	93.4286	0.565733	-0.821806	4.85e-06	8.39e-05
Potra002463g18660	55.362	70.6842	40.0399	0.566462	-0.81995	0.00118534	0.00996836
Potra000466g02783	40.4919	51.6896	29.2943	0.566734	-0.819255	0.00624111	0.0389436
Potra001405g11927	33.0458	42.1835	23.9081	0.566765	-0.819177	0.0079864	0.0471995
Potra000358g01431	34.7412	44.3473	25.1351	0.566779	-0.819141	0.00664751	0.0410016
Potra002267g17389	129.983	165.901	94.0653	0.566998	-0.818584	1.07e-05	0.000169988
Potra167732g27305	37.9759	48.4644	27.4873	0.567164	-0.818162	0.00587762	0.0371671
Potra174787g27752	78.4072	100.049	56.7651	0.567371	-0.817635	0.000836065	0.00740461
Potra002026g15863	59.9633	76.5047	43.4219	0.567571	-0.817127	0.00379991	0.0263054
Potra000993g08233	96.7024	123.368	70.0373	0.567713	-0.816767	3.74e-05	0.000508316
Potra002699g19788	63.0288	80.4082	45.6494	0.567721	-0.816746	0.00166331	0.0132589
Potra003649g22298	72.7659	92.7664	52.7653	0.568798	-0.814012	0.000511814	0.00493313
Potra001493g12463	45.9085	58.5253	33.2917	0.568843	-0.813897	0.00733728	0.0441959
Potra001611g13277	83.2045	106.069	60.3396	0.56887	-0.81383	0.000179951	0.00202798
Potra001201g10373	41.5805	53.0018	30.1592	0.569021	-0.813446	0.0048552	0.0320032
Potra001163g10104	54.5242	69.4884	39.5601	0.569305	-0.812726	0.00405979	0.0277049
Potra001614g13299	365.925	466.321	265.53	0.569414	-0.812449	3.35e-08	8.84e-07
Potra001459g12269	440.17	560.904	319.437	0.569504	-0.812223	7.5e-10	2.54e-08
Potra001827g14723	57.5487	73.3317	41.7656	0.569544	-0.81212	0.00123502	0.0103268
Potra003658g32302	48.7946	62.1741	35.4151	0.569612	-0.811949	0.00294996	0.0214064
Potra001954g15437	81.0739	103.292	58.8553	0.569794	-0.811489	0.000267287	0.0028452
Potra002352g17946	83.8483	106.824	60.8722	0.569835	-0.811384	0.000167172	0.0018978
Potra003930g23588	117.698	149.936	85.4596	0.569975	-0.811029	4.42e-05	0.000588629
Potra002152g16644	476.578	607.011	346.145	0.570245	-0.810346	1.38e-07	3.25e-06
Potra000524g03576	50.0841	63.7879	36.3802	0.570331	-0.810129	0.00317462	0.0227052
Potra000372g01579	67.2155	85.6056	48.8254	0.570352	-0.810075	0.000771955	0.0069451
Potra000942g07709	110.48	140.673	80.2881	0.570745	-0.809083	4.67e-05	0.00061768
Potra001270g10977	979.875	1247.54	712.212	0.570894	-0.808705	1.36e-08	3.82e-07
Potra003531g21921	112.053	142.594	81.5119	0.571636	-0.80683	4.97e-05	0.000650754
Potra000414g02070	101.481	129.131	73.8303	0.571749	-0.806546	0.00201938	0.0155754
Potra001166g10117	177.387	225.689	129.085	0.571961	-0.806012	7.49e-07	1.55e-05
Potra001115g09804	182.387	232.023	132.751	0.572145	-0.805547	1.79e-06	3.41e-05
Potra000673g05213	68.5344	87.1561	49.9128	0.572682	-0.804193	0.000188516	0.00211169
Potra000941g07694	55.5198	70.6012	40.4385	0.572773	-0.803964	0.00105207	0.00900695
Potra001943g15375	219.907	279.563	160.251	0.573221	-0.802836	1.84e-05	0.000272945
Potra166880g27235	55.1676	70.1005	40.2347	0.573958	-0.800982	0.00193126	0.0150753
Potra000729g05735	307.361	390.395	224.327	0.574614	-0.799334	0.00147698	0.0120179
Potra003700g22485	458.254	581.69	334.819	0.575597	-0.79687	1.63e-09	5.24e-08
Potra002717g19822	70.661	89.6851	51.6369	0.575758	-0.796465	0.000214669	0.00236001
Potra148962g26639	979.326	1242.91	715.738	0.575855	-0.796223	4.36e-09	1.32e-07
Potra194113g28928	68.4637	86.8647	50.0626	0.576329	-0.795037	0.00080429	0.00718031
Potra000884g07139	672.902	853.611	492.192	0.5766	-0.794357	1.83e-10	6.66e-09
Potra000998g08308	7282.26	9232.46	5332.07	0.577535	-0.79202	1.4e-15	9.53e-14
Potra001948g15398	819.069	1038.37	599.766	0.577602	-0.791852	3.13e-11	1.28e-09
Potra001606g13237	53.3033	67.5476	39.059	0.578245	-0.790248	0.00674702	0.0414353
Potra000709g05549	177.628	225.076	130.18	0.578383	-0.789902	4.14e-05	0.000555325
Potra002525g19057	247.774	313.938	181.61	0.578489	-0.789639	7.13e-07	1.48e-05
Potra001421g12030	250.752	317.691	183.813	0.57859	-0.789388	0.000917943	0.00803907
Potra003846g23120	52.2365	66.1738	38.2992	0.578767	-0.788945	0.00318966	0.0227835
Potra001024g08552	254.03	321.807	186.253	0.578774	-0.788929	1.55e-07	3.61e-06
Potra001049g08921	58.0258	73.4946	42.557	0.579049	-0.788243	0.00331618	0.0235183
Potra004615g25120	49.2246	62.3444	36.1049	0.579119	-0.788067	0.00190071	0.0148744
Potra001249g10745	659.216	834.897	483.536	0.579156	-0.787976	6.52e-11	2.54e-09
Potra000698g05434	42.6144	53.9706	31.2583	0.579173	-0.787933	0.0065031	0.0402625
Potra003850g23150	1069.81	1354.62	784.996	0.579495	-0.787133	1.17e-07	2.8e-06
Potra002596g19505	108.44	137.308	79.5717	0.579514	-0.787084	5.98e-05	0.000769702
Potra000892g07209	70.6336	89.4347	51.8325	0.579557	-0.786978	0.000534192	0.00512574
Potra000812g06469	43.8864	55.5628	32.2099	0.579703	-0.786614	0.00685871	0.0419455
Potra000941g07702	76.3451	96.6527	56.0376	0.579783	-0.786416	0.000611555	0.0057416
Potra000666g05151	437.836	554.178	321.493	0.580126	-0.785561	9.63e-09	2.77e-07
Potra001605g13235	123.752	156.621	90.8839	0.580281	-0.785178	1.68e-05	0.00025094
Potra002322g17736	40.3657	51.0836	29.6478	0.580378	-0.784935	0.00602615	0.0379082
Potra001569g12978	102.36	129.476	75.2444	0.581145	-0.783031	0.000150489	0.001731
Potra000436g02375	91.0326	115.138	66.9275	0.581283	-0.782688	0.000257894	0.00276105
Potra001235g30674	312.281	394.913	229.648	0.581516	-0.782109	7.07e-07	1.47e-05
Potra003237g21094	77.097	97.4643	56.7296	0.582055	-0.780772	0.000495909	0.00480477
Potra000829g06638	88.2077	111.502	64.9138	0.582178	-0.780468	0.000375655	0.00380522
Potra000040g00193	332.971	420.809	245.133	0.582528	-0.7796	5.38e-08	1.37e-06
Potra168167g27344	158.249	199.932	116.565	0.583021	-0.778379	9.64e-06	0.000155555
Potra003956g23749	46.0476	58.1763	33.919	0.583038	-0.778337	0.00812712	0.0478887
Potra001877g14981	128.043	161.759	94.3272	0.583136	-0.778096	0.000796406	0.00712364
Potra001061g09099	582.652	736.051	429.253	0.583184	-0.777978	4.71e-10	1.64e-08
Potra001727g14059	120.607	152.357	88.8567	0.583214	-0.777902	3.57e-05	0.000489155
Potra002196g16917	59.3867	75.0154	43.758	0.583321	-0.777639	0.000706113	0.00646345
Potra003736g22631	454.454	574.001	334.908	0.583462	-0.777291	7.35e-08	1.81e-06
Potra003945g23692	141.863	179.06	104.666	0.584529	-0.774653	0.0067007	0.0412656
Potra002827g20072	83.9362	105.934	61.9382	0.584686	-0.774266	0.000663659	0.00613333
Potra002958g20396	425.185	536.611	313.758	0.584702	-0.774227	0.00128661	0.0106955
Potra001451g12205	119.377	150.647	88.1078	0.584862	-0.773831	7.34e-05	0.000921249
Potra001247g10716	299.21	377.508	220.912	0.585184	-0.773038	4.99e-05	0.000652858
Potra001809g14629	236.57	298.399	174.742	0.585597	-0.772019	1.85e-07	4.27e-06
Potra001016g08476	114.127	143.94	84.3132	0.585751	-0.771642	0.000109484	0.00130623
Potra001895g15073	370.551	467.073	274.03	0.586695	-0.769316	6.5e-07	1.36e-05
Potra186376g28435	93.5324	117.879	69.1859	0.586924	-0.768755	0.000284225	0.00299759
Potra000656g05057	97.1679	122.459	71.8765	0.586943	-0.768708	0.000591389	0.00558788
Potra004251g24733	1211.31	1526.43	896.19	0.587115	-0.768284	4.27e-12	1.96e-10
Potra001028g08627	63.3595	79.837	46.882	0.587222	-0.768022	0.000943076	0.00822414
Potra005496g25416	776.063	977.592	574.534	0.587703	-0.76684	6.21e-10	2.13e-08
Potra001609g13268	399.231	502.844	295.617	0.58789	-0.766381	6.57e-09	1.94e-07
Potra000532g03710	72.0064	90.6826	53.3302	0.588098	-0.765872	0.000755631	0.00681807
Potra003940g23656	54.6101	68.7613	40.4589	0.588396	-0.765142	0.00487139	0.0320719
Potra170384g27515	125.629	158.177	93.0799	0.588452	-0.765003	6.08e-05	0.000778941
Potra003796g22888	84.8875	106.873	62.9017	0.588563	-0.764731	0.000809898	0.00722343
Potra000927g07529	226.726	285.43	168.022	0.588661	-0.76449	1.58e-06	3.04e-05
Potra003337g21387	374.65	471.651	277.649	0.588676	-0.764455	1.05e-05	0.000166699
Potra000896g07270	244.282	307.503	181.06	0.588806	-0.764136	1.39e-06	2.72e-05
Potra175325g27791	623.881	785.319	462.444	0.588861	-0.764	4.13e-10	1.44e-08
Potra001855g14860	212.159	266.946	157.373	0.589529	-0.762366	2.34e-06	4.34e-05
Potra000470g02835	81.3383	102.323	60.3538	0.589836	-0.761613	0.000463376	0.00455617
Potra002728g19854	235.171	295.832	174.51	0.589895	-0.76147	5.8e-05	0.00074927
Potra002276g17450	184.534	231.983	137.086	0.590929	-0.758942	0.000154858	0.00177758
Potra000989g08185	1372.23	1724.9	1019.56	0.591085	-0.758562	1.42e-05	0.000217962
Potra168443g31109	168.8	212.15	125.449	0.591323	-0.757981	4.09e-06	7.21e-05
Potra000876g07070	379.893	477.455	282.332	0.591327	-0.757972	1.74e-08	4.78e-07
Potra001084g09387	196.274	246.675	145.873	0.591355	-0.757903	2.86e-06	5.22e-05
Potra001086g09433	200.797	252.318	149.275	0.591615	-0.75727	4.51e-06	7.87e-05
Potra002445g18534	476.136	598.237	354.035	0.591798	-0.756824	3.77e-06	6.7e-05
Potra001083g09382	61.0322	76.6715	45.3928	0.592043	-0.756226	0.0032487	0.0231518
Potra001184g10269	150.029	188.468	111.59	0.592088	-0.756116	1.51e-05	0.000229142
Potra000729g05733	148.991	187.152	110.831	0.592196	-0.755853	5.7e-05	0.000738884
Potra186017g28402	97.8159	122.867	72.7643	0.592218	-0.755799	0.00671814	0.0413182
Potra003906g23445	121.115	152.127	90.1034	0.592289	-0.755627	7.08e-05	0.000895485
Potra003454g21718	828.756	1040.7	616.809	0.592684	-0.754664	0.00128063	0.0106602
Potra001912g15168	225.194	282.737	167.651	0.592958	-0.753998	9.79e-07	1.98e-05
Potra003967g23827	77.3754	97.1416	57.6092	0.593044	-0.753789	0.00240501	0.0180253
Potra006172g25592	56.182	70.533	41.8311	0.59307	-0.753725	0.00618928	0.0386969
Potra000728g05715	118.352	148.564	88.1409	0.593288	-0.753196	0.000194527	0.00216767
Potra001006g08370	156.006	195.824	116.189	0.593331	-0.75309	7.87e-06	0.000129705
Potra002416g18376	228.795	287.161	170.429	0.593497	-0.752688	0.00037164	0.00376866
Potra004004g24117	54.1563	67.9619	40.3507	0.593725	-0.752133	0.00610412	0.0383294
Potra002929g20335	367.68	461.338	274.022	0.593972	-0.751534	0.000212983	0.00234363
Potra000943g34720	48.2239	60.5024	35.9455	0.594116	-0.751182	0.00771784	0.0458968
Potra002590g19478	179.038	224.618	133.458	0.594155	-0.751088	1.09e-05	0.000173282
Potra179682g28040	356.817	447.588	266.047	0.594401	-0.750492	0.00039693	0.00398304
Potra001112g09770	1253.87	1572.31	935.423	0.594935	-0.749196	2.34e-11	9.67e-10
Potra000273g01024	781.941	980.53	583.352	0.594935	-0.749195	8.72e-11	3.3e-09
Potra001771g14397	56.0971	70.3204	41.8738	0.595471	-0.747897	0.00285032	0.0207864
Potra000663g05119	149.054	186.824	111.284	0.595664	-0.74743	8.6e-05	0.00105884
Potra188350g28593	227.932	285.646	170.217	0.595901	-0.746856	1.92e-06	3.65e-05
Potra160729g30978	47.2889	59.2551	35.3228	0.596113	-0.746342	0.00753016	0.0450773
Potra001774g14449	50.3419	63.0759	37.6079	0.596232	-0.746054	0.00394399	0.027094
Potra001281g11059	117.248	146.895	87.6012	0.596354	-0.745759	0.000688524	0.00632325
Potra000538g03779	87.2627	109.314	65.2112	0.596548	-0.745289	0.000724197	0.00659645
Potra001475g12344	72.5304	90.8563	54.2046	0.596597	-0.745173	0.00350212	0.0245678
Potra000963g07913	478.202	598.972	357.432	0.596743	-0.744818	5.85e-09	1.74e-07
Potra002114g16420	407.314	510.169	304.459	0.596781	-0.744728	1.2e-08	3.4e-07
Potra000660g05081	278.541	348.864	208.217	0.596843	-0.744577	7.01e-07	1.46e-05
Potra002322g17758	975.175	1221.08	729.269	0.597232	-0.743637	1.84e-07	4.25e-06
Potra001267g10952	46.4395	58.1448	34.7343	0.597375	-0.74329	0.00422855	0.0286598
Potra000335g01162	255.835	320.305	191.364	0.597444	-0.743125	1.14e-06	2.27e-05
Potra188350g28594	741.684	928.43	554.938	0.597717	-0.742466	3.43e-08	9.02e-07
Potra001817g14666	216.096	270.486	161.706	0.597837	-0.742177	2.91e-06	5.31e-05
Potra000851g06881	224.176	280.542	167.809	0.598159	-0.741398	0.00294822	0.0213994
Potra001083g09362	379.396	474.766	284.026	0.598244	-0.741193	3.9e-08	1.02e-06
Potra001057g09067	62.5833	78.2941	46.8725	0.598672	-0.740162	0.00372393	0.0258695
Potra001062g09110	45.7053	57.1712	34.2394	0.598892	-0.739632	0.00737213	0.0443507
Potra001739g14166	236.998	296.446	177.55	0.598928	-0.739545	1.64e-05	0.000246482
Potra001773g14435	70.3697	88.0168	52.7226	0.599006	-0.739357	0.00188101	0.0147368
Potra000691g05372	79.8692	99.888	59.8504	0.599175	-0.73895	0.000794545	0.00711582
Potra004030g24346	635.187	794.312	476.062	0.599339	-0.738556	3.77e-09	1.16e-07
Potra001265g10942	93.1524	116.472	69.8329	0.599568	-0.738004	0.000453268	0.00447735
Potra003075g20681	338.299	422.889	253.71	0.599944	-0.7371	0.000459939	0.00452878
Potra000748g05893	151.988	189.985	113.991	0.600001	-0.736963	2.72e-05	0.000385871
Potra000597g04532	296.13	370.137	222.123	0.600112	-0.736697	3.42e-05	0.000469514
Potra186362g28434	120.285	150.344	90.2257	0.600127	-0.736659	7.19e-05	0.000907387
Potra000844g06804	284.321	355.325	213.318	0.600346	-0.736134	2.91e-06	5.31e-05
Potra002783g19963	93.806	117.225	70.387	0.600443	-0.7359	0.000194434	0.00216751
Potra001900g15098	457.784	571.936	343.632	0.600823	-0.734989	1.88e-08	5.13e-07
Potra001230g10586	118.418	147.942	88.8945	0.600874	-0.734865	0.000160298	0.00183172
Potra175260g27785	169.232	211.414	127.049	0.60095	-0.734684	2.75e-05	0.000388696
Potra000902g07321	115.544	144.34	86.7467	0.600988	-0.734593	0.00529302	0.0342166
Potra002082g16223	59.0001	73.6899	44.3104	0.601309	-0.733822	0.0054774	0.0351797
Potra002341g17887	147.34	184.001	110.678	0.601504	-0.733355	7.45e-05	0.000933399
Potra003884g23330	228.549	285.389	171.709	0.601666	-0.732965	3.38e-06	6.08e-05
Potra000579g04331	428.777	535.393	322.16	0.601726	-0.732822	1.85e-08	5.04e-07
Potra000950g07792	823.856	1028.52	619.196	0.602028	-0.732098	3.04e-09	9.42e-08
Potra003049g20625	123.629	154.337	92.9212	0.602066	-0.732007	6.19e-05	0.000792347
Potra166692g27228	203.295	253.771	152.819	0.602192	-0.731705	7.06e-06	0.000117965
Potra007866g26050	84.1803	105.052	63.3088	0.602644	-0.730622	0.000783375	0.0070274
Potra000563g04104	74.8326	93.3855	56.2798	0.602661	-0.730582	0.00186016	0.0145816
Potra001018g08501	447.069	557.882	336.255	0.602735	-0.730404	9.9e-06	0.000159044
Potra001523g12667	932.426	1163.49	701.36	0.602806	-0.730235	3.87e-10	1.36e-08
Potra182098g28206	228.16	284.656	171.663	0.603055	-0.729639	4.89e-06	8.45e-05
Potra001922g31464	118.028	147.229	88.8275	0.603327	-0.728988	0.000157972	0.0018081
Potra002331g17825	74.8216	93.3129	56.3303	0.603671	-0.728166	0.00114918	0.00973183
Potra000569g04208	599.752	747.934	451.57	0.603757	-0.72796	8.34e-10	2.8e-08
Potra002050g16005	133.467	166.443	100.492	0.603761	-0.727952	2.91e-05	0.000408241
Potra000439g02404	137.701	171.663	103.739	0.604318	-0.72662	0.000572149	0.0054319
Potra002427g18440	122.137	152.251	92.0231	0.604416	-0.726386	0.000355414	0.00362393
Potra001537g12770	59.7227	74.4445	45.0008	0.604487	-0.726216	0.00514404	0.0334398
Potra000516g03422	72.9239	90.8874	54.9604	0.604709	-0.725688	0.00164645	0.0131433
Potra002525g19055	140.476	175.067	105.885	0.604825	-0.72541	3.31e-05	0.000456634
Potra002788g19972	256.004	319.021	192.987	0.604936	-0.725145	3.66e-05	0.000498989
Potra174622g27740	62.9682	78.4682	47.4682	0.604936	-0.725145	0.00712967	0.04327
Potra199374g29399	54.9517	68.462	41.4413	0.605318	-0.724234	0.00727523	0.043872
Potra000418g02150	125.339	156.144	94.5333	0.605422	-0.723986	0.000275659	0.00291537
Potra194691g28978	171.328	213.433	129.223	0.605451	-0.723918	2.87e-05	0.000403415
Potra155715g26772	63.9026	79.5953	48.2099	0.605688	-0.723353	0.00636946	0.0395936
Potra003567g22047	60.7299	75.6414	45.8184	0.605731	-0.723251	0.00274315	0.020142
Potra162249g27002	487.714	607.315	368.113	0.606131	-0.722298	5.59e-05	0.000725705
Potra003892g23375	271.757	338.391	205.123	0.606171	-0.722204	0.000147781	0.00170619
Potra003951g32462	1096.15	1364.85	827.446	0.606253	-0.722009	1.36e-10	5.02e-09
Potra001175g10178	51.2906	63.863	38.7182	0.60627	-0.721968	0.00634679	0.039488
Potra003468g21767	66.2893	82.5278	50.0507	0.606471	-0.721489	0.00749461	0.0449107
Potra179135g27992	48.9508	60.939	36.9625	0.606549	-0.721303	0.00719853	0.0435277
Potra002176g16789	47.7296	59.4151	36.044	0.606648	-0.721068	0.00639351	0.0397077
Potra003216g21027	67.4034	83.8895	50.9172	0.606956	-0.720336	0.00373223	0.0259081
Potra001304g11213	218.18	271.518	164.843	0.607116	-0.719956	2.98e-06	5.41e-05
Potra001096g09541	105.279	131.006	79.5519	0.60724	-0.719662	0.000550483	0.00525669
Potra000411g02018	114.749	142.768	86.7294	0.607485	-0.719079	0.000942214	0.00822178
Potra001115g09806	298.095	370.871	225.32	0.607544	-0.718938	4.38e-07	9.46e-06
Potra189189g28664	10026.7	12474.5	7578.9	0.607551	-0.718923	5.17e-13	2.66e-11
Potra004075g24452	228.727	284.56	172.894	0.607586	-0.718839	3.46e-06	6.2e-05
Potra000817g06509	61.4572	76.4585	46.4558	0.607595	-0.718818	0.00601515	0.0378562
Potra000508g03312	808.14	1005.26	611.022	0.607827	-0.718266	2.3e-09	7.24e-08
Potra000671g05203	88.0349	109.494	66.5755	0.608028	-0.71779	0.000685202	0.00629481
Potra002073g16165	119.291	148.356	90.2257	0.608168	-0.717457	0.000147095	0.00169898
Potra186473g31380	186.777	232.276	141.279	0.608236	-0.717297	0.00011283	0.00134162
Potra003998g24070	137.505	170.988	104.022	0.608356	-0.717013	7.48e-05	0.000935774
Potra001682g13757	205.992	256.13	155.854	0.608495	-0.716684	6.63e-06	0.000111554
Potra002330g17817	114.655	142.558	86.7513	0.608533	-0.716592	0.00027876	0.00294481
Potra004009g24166	249.817	310.611	189.022	0.608549	-0.716553	8.14e-06	0.000133258
Potra001240g10648	97.0371	120.651	73.4232	0.608559	-0.716531	0.000867331	0.00763778
Potra001667g13699	54.2254	67.4158	41.0349	0.608684	-0.716234	0.00258427	0.0191675
Potra000470g02817	71.3131	88.6513	53.9749	0.608845	-0.715852	0.00190439	0.0148948
Potra001061g09106	308.587	383.493	233.68	0.609346	-0.714667	1.09e-06	2.19e-05
Potra001252g10778	85.2305	105.915	64.5461	0.609415	-0.714504	0.00148875	0.0120854
Potra002006g15739	338.315	420.36	256.271	0.609647	-0.713955	3.33e-07	7.37e-06
Potra003452g21708	63.1722	78.4865	47.858	0.609761	-0.713685	0.00297073	0.0215232
Potra199773g29437	88.4561	109.896	67.0158	0.609809	-0.713571	0.0060994	0.0383084
Potra000607g04621	354.666	440.602	268.73	0.609916	-0.713316	6.9e-07	1.44e-05
Potra004043g24373	187.11	232.394	141.826	0.610284	-0.712447	4.73e-05	0.000624599
Potra001744g14205	177.362	220.28	134.444	0.610333	-0.712331	0.0042956	0.0290154
Potra001890g15046	558.097	692.992	423.202	0.610687	-0.711494	5.54e-05	0.000720069
Potra002322g17756	1597.12	1982.99	1211.25	0.610824	-0.711172	3.98e-11	1.6e-09
Potra002306g17583	99.1244	123.053	75.1954	0.611079	-0.710569	0.000859274	0.00757882
Potra000404g01913	812.397	1008.35	616.447	0.611344	-0.709944	2.76e-09	8.59e-08
Potra001692g13835	3103.88	3852.1	2355.66	0.611526	-0.709515	4.33e-07	9.35e-06
Potra001380g11777	259.775	322.382	197.168	0.611597	-0.709348	8.41e-07	1.72e-05
Potra001696g13859	141.755	175.874	107.637	0.612015	-0.708361	6.77e-05	0.000859503
Potra004012g24206	128.348	159.237	97.4599	0.612045	-0.708291	0.000145757	0.00168562
Potra002322g17750	553.99	687.175	420.804	0.612369	-0.707527	2.39e-08	6.43e-07
Potra000266g01008	85.7565	106.36	65.153	0.61257	-0.707052	0.000540158	0.00517743
Potra163525g27101	985.214	1221.83	748.598	0.612686	-0.706781	0.000502442	0.00485642
Potra000016g00081	55.9684	69.4003	42.5366	0.612917	-0.706238	0.00476942	0.0315723
Potra003805g22921	58.5427	72.5842	44.5013	0.6131	-0.705807	0.00774473	0.0460056
Potra003675g22401	281.181	348.62	213.742	0.61311	-0.705781	0.00109238	0.0093074
Potra000808g06441	6287.74	7792.83	4782.64	0.613723	-0.704342	1.92e-12	9.18e-11
Potra003629g22214	497.782	616.848	378.717	0.613955	-0.703796	3.86e-08	1.01e-06
Potra000468g02804	343.793	425.986	261.6	0.614106	-0.703441	2.92e-07	6.54e-06
Potra193869g28907	327.946	406.147	249.746	0.614916	-0.701539	5.3e-07	1.13e-05
Potra000352g01310	512.531	634.626	390.436	0.615222	-0.700821	6.55e-07	1.37e-05
Potra001821g14695	87.5373	108.387	66.6876	0.615273	-0.7007	0.00230925	0.0174199
Potra003370g21472	754.397	933.949	574.845	0.615499	-0.700172	4.35e-09	1.32e-07
Potra000577g04307	127.578	157.935	97.2209	0.615577	-0.699989	0.000343893	0.00352582
Potra001444g12159	92.4913	114.499	70.484	0.615588	-0.699963	0.000693229	0.00636016
Potra000873g07024	183.689	227.383	139.995	0.615679	-0.69975	0.000108138	0.0012919
Potra001519g12651	117.215	145.093	89.3364	0.615718	-0.699659	0.00745868	0.0447553
Potra002497g18861	217.016	268.629	165.403	0.61573	-0.69963	2.68e-06	4.94e-05
Potra000234g00934	82.563	102.193	62.9333	0.615829	-0.699397	0.00222147	0.0168677
Potra002092g16283	375.482	464.702	286.263	0.616014	-0.698966	7.65e-05	0.000954791
Potra004311g24802	67.5052	83.5447	51.4657	0.616025	-0.698939	0.00251064	0.0186861
Potra002082g16222	408.233	505.193	311.273	0.616146	-0.698655	5.93e-08	1.49e-06
Potra001699g13880	78.3985	97.0154	59.7816	0.616208	-0.698511	0.00225158	0.0170683
Potra165035g27200	227.33	281.31	173.351	0.616226	-0.698469	3.47e-06	6.21e-05
Potra001051g08941	62.432	77.2544	47.6095	0.616269	-0.698367	0.00463801	0.0308934
Potra000353g01347	75.9162	93.9068	57.9257	0.616843	-0.697025	0.00150262	0.0121803
Potra000973g08054	313.198	387.301	239.095	0.617336	-0.695871	5.77e-06	9.86e-05
Potra003782g22835	179.481	221.898	137.064	0.61769	-0.695044	3.93e-05	0.000531929
Potra000002g00014	94.1984	116.456	71.9413	0.617757	-0.694889	0.000998571	0.00862433
Potra000376g01612	101.756	125.772	77.7401	0.618103	-0.69408	0.00106501	0.00909094
Potra001247g10733	13343	16490.8	10195.1	0.618233	-0.693778	3.25e-11	1.32e-09
Potra000812g06471	539.658	666.911	412.404	0.61838	-0.693435	9.7e-08	2.33e-06
Potra000166g00619	74.4543	91.9826	56.9261	0.618879	-0.692271	0.00574896	0.0365695
Potra000457g02638	140.61	173.703	107.517	0.618969	-0.69206	0.000117382	0.00138922
Potra000521g03529	444.528	549.099	339.957	0.619117	-0.691716	8.99e-08	2.18e-06
Potra002054g16021	5435.51	6713	4158.02	0.619398	-0.691061	7.95e-12	3.51e-10
Potra000983g08125	147.438	182.079	112.796	0.619492	-0.690842	7.18e-05	0.000906409
Potra004022g24316	296.84	366.56	227.121	0.619602	-0.690587	0.000129961	0.00151745
Potra001108g09712	67.0843	82.8324	51.3362	0.61976	-0.690218	0.00467157	0.0310724
Potra000653g05029	788.727	973.874	603.58	0.619773	-0.690188	5.9e-09	1.75e-07
Potra008967g26265	1301.05	1606.34	995.752	0.619888	-0.689919	8.43e-08	2.05e-06
Potra000747g05884	1500.9	1853.06	1148.74	0.619914	-0.689859	3.72e-10	1.31e-08
Potra001347g11567	9175.79	11324.7	7026.88	0.620491	-0.688518	6.54e-08	1.63e-06
Potra001961g15492	62.1531	76.6982	47.6079	0.620718	-0.68799	0.00431677	0.0291442
Potra000531g03696	184.41	227.53	141.29	0.620974	-0.687395	4.52e-05	0.000600048
Potra000605g04598	639.914	789.476	490.352	0.621111	-0.687076	6.95e-09	2.05e-07
Potra004608g25111	272.225	335.806	208.644	0.621324	-0.686583	0.000263424	0.0028073
Potra000851g06886	78.8371	97.2422	60.432	0.621459	-0.68627	0.00306639	0.0220844
Potra000637g04868	391.12	482.416	299.823	0.621503	-0.686167	4.19e-06	7.38e-05
Potra001344g11543	385.77	475.811	295.728	0.621525	-0.686116	1.36e-06	2.66e-05
Potra001351g11591	2704.32	3335.22	2073.42	0.621672	-0.685774	4.25e-07	9.2e-06
Potra003559g22020	871.896	1075.11	668.677	0.621959	-0.685108	3.38e-09	1.04e-07
Potra000711g05567	328.216	404.618	251.815	0.622353	-0.684196	1.48e-06	2.86e-05
Potra002203g16961	73.7573	90.9106	56.6041	0.622635	-0.683543	0.00389127	0.0267847
Potra000865g06988	333.342	410.859	255.824	0.622657	-0.68349	7.59e-07	1.57e-05
Potra000267g01010	86.5306	106.65	66.4115	0.622707	-0.683374	0.00194427	0.0151472
Potra003067g20665	115.953	142.904	89.0026	0.622815	-0.683125	0.000334033	0.00343739
Potra004111g24521	85.2734	105.085	65.4615	0.622937	-0.682841	0.00214754	0.0163868
Potra003430g21643	145.458	179.251	111.666	0.622961	-0.682786	0.000443795	0.00439469
Potra002390g18190	353.756	435.873	271.639	0.623207	-0.682217	0.00113257	0.00960576
Potra198429g29316	84.4575	104.045	64.8704	0.623487	-0.681569	0.00155758	0.012549
Potra004117g24533	104.619	128.872	80.3663	0.623614	-0.681275	0.000455203	0.00449328
Potra002335g17855	2120.27	2611.78	1628.76	0.623619	-0.681263	9.88e-09	2.83e-07
Potra001176g10184	164.782	202.96	126.603	0.62378	-0.680892	0.00012007	0.00141622
Potra004422g24905	88.2375	108.676	67.7995	0.623871	-0.68068	0.00255324	0.0189677
Potra002861g20172	338.166	416.442	259.891	0.624076	-0.680206	1.09e-06	2.19e-05
Potra000575g04280	186.458	229.616	143.3	0.624084	-0.680187	0.00135834	0.0112031
Potra002924g20325	213.663	263.115	164.21	0.624102	-0.680146	3.62e-05	0.000494626
Potra001703g13894	83.3813	102.679	64.0837	0.624117	-0.680111	0.00130565	0.0108254
Potra167471g27278	81.7728	100.675	62.8709	0.624495	-0.679238	0.00108168	0.00922475
Potra000587g04402	217.732	268.002	167.462	0.624852	-0.678415	1.6e-05	0.000240678
Potra001453g12222	1812.14	2230.4	1393.88	0.624945	-0.678198	1.18e-10	4.4e-09
Potra000706g05510	65.2739	80.3288	50.219	0.625168	-0.677684	0.00625617	0.0390113
Potra002550g19204	755.183	929.146	581.221	0.625543	-0.676819	1.15e-05	0.000181017
Potra001598g13198	65.9739	81.1623	50.7855	0.625728	-0.676393	0.00583093	0.0369389
Potra002321g17701	827.725	1018.27	637.183	0.625753	-0.676335	0.00465732	0.0309924
Potra001201g10374	92.9101	114.283	71.5374	0.625968	-0.67584	0.000877267	0.00771064
Potra170366g31142	125.701	154.603	96.7994	0.626117	-0.675497	0.000766389	0.00689949
Potra000961g07904	352.662	433.731	271.592	0.626177	-0.675357	8.58e-07	1.75e-05
Potra000718g05625	310.635	382.021	239.25	0.626274	-0.675133	1.47e-06	2.84e-05
Potra000891g07201	228.17	280.532	175.807	0.62669	-0.674176	1.09e-05	0.000173298
Potra194271g28943	131.008	161.07	100.946	0.626721	-0.674104	0.000269433	0.00286344
Potra003580g22075	180.033	221.322	138.744	0.626888	-0.673721	4.1e-05	0.000551888
Potra000473g02865	107.757	132.45	83.064	0.627136	-0.673149	0.00492038	0.0322952
Potra000524g03557	134.683	165.536	103.829	0.62723	-0.672934	0.000496527	0.00480909
Potra000580g04336	146.146	179.621	112.671	0.627272	-0.672836	0.000588972	0.00557231
Potra002269g17398	68.3734	84.0265	52.7203	0.627425	-0.672485	0.00514174	0.0334327
Potra172818g27605	402.393	494.512	310.273	0.627433	-0.672466	0.00488183	0.0321179
Potra003213g21013	82.0727	100.856	63.2891	0.627518	-0.67227	0.00233684	0.0175806
Potra163547g34958	250.457	307.757	193.158	0.627631	-0.672012	8.46e-06	0.000138244
Potra000353g01346	70.5919	86.7393	54.4444	0.627679	-0.671901	0.00792131	0.046941
Potra001342g11515	63.3373	77.8177	48.8569	0.627838	-0.671536	0.00615118	0.0385437
Potra001741g14194	106.854	131.281	82.4266	0.627864	-0.671476	0.000294237	0.00308605
Potra001421g12026	770.557	946.386	594.729	0.628421	-0.670197	1.82e-08	4.98e-07
Potra161871g26977	70.9084	87.0812	54.7356	0.628558	-0.669881	0.00659141	0.0407187
Potra003667g22375	702.479	862.608	542.351	0.628734	-0.669479	2.26e-08	6.11e-07
Potra000499g03212	169.467	208.092	130.842	0.62877	-0.669395	2.19e-05	0.000317155
Potra000175g00663	131.507	161.46	101.554	0.628972	-0.668932	0.000318452	0.003299
Potra002186g16836	78.2668	96.0622	60.4714	0.629502	-0.667717	0.00491093	0.032256
Potra000436g02378	125.489	153.976	97.0021	0.629983	-0.666616	0.000379367	0.00383444
Potra001566g12950	442.214	542.489	341.94	0.630317	-0.665851	2.33e-07	5.31e-06
Potra002028g15876	102.517	125.741	79.293	0.630605	-0.665192	0.00343915	0.0242667
Potra007861g26046	372.359	456.59	288.127	0.631042	-0.664193	1.22e-06	2.42e-05
Potra162920g27049	155.153	190.205	120.102	0.631431	-0.663304	0.000156868	0.00179647
Potra002634g19623	144.848	177.569	112.126	0.631452	-0.663255	0.000220246	0.00241084
Potra003829g23022	114.872	140.819	88.9253	0.631488	-0.663174	0.00128277	0.0106748
Potra000838g06760	240.301	294.528	186.075	0.631775	-0.662518	5.38e-06	9.24e-05
Potra006395g25670	204.201	250.195	158.208	0.63234	-0.661227	4.66e-05	0.000617223
Potra001586g13121	277.763	340.304	215.222	0.63244	-0.661	7.6e-06	0.000125848
Potra000858g06943	266.95	327.05	206.849	0.632469	-0.660934	7.51e-06	0.000124723
Potra160416g26856	60.4229	74.024	46.8219	0.632524	-0.660808	0.00828032	0.0485858
Potra000947g07765	79.0123	96.7491	61.2754	0.633344	-0.65894	0.00495601	0.0324601
Potra000008g00038	98.3454	120.422	76.2687	0.633344	-0.658939	0.00199818	0.0154633
Potra000496g03167	102.332	125.29	79.3735	0.63352	-0.658538	0.00235941	0.0177312
Potra001047g08885	90.1083	110.301	69.9157	0.633863	-0.657756	0.00529595	0.0342183
Potra181140g28133	161.514	197.702	125.327	0.633918	-0.657632	0.00021079	0.00232471
Potra190179g28749	66.6937	81.6322	51.7552	0.634005	-0.657435	0.00645181	0.0399717
Potra002005g15736	520.105	636.511	403.699	0.634237	-0.656907	1.42e-07	3.35e-06
Potra000151g00533	65.3016	79.9139	50.6892	0.634298	-0.656768	0.00639219	0.0397077
Potra000819g06525	86.4463	105.773	67.1194	0.634559	-0.656175	0.00296875	0.0215156
Potra003785g22852	84.8859	103.851	65.9206	0.63476	-0.655718	0.0023764	0.0178397
Potra003808g22934	378.111	462.569	293.653	0.634831	-0.655556	0.00342685	0.0242044
Potra000454g02591	62.7711	76.7862	48.756	0.634958	-0.655266	0.0077179	0.0458968
Potra002089g16277	126.139	154.283	97.9941	0.635157	-0.654814	0.000309748	0.00322203
Potra002926g20331	159.883	195.553	124.213	0.635187	-0.654746	0.000132756	0.00154813
Potra003202g20991	110.939	135.664	86.2141	0.635499	-0.654038	0.000493075	0.00478398
Potra000515g03407	158.41	193.712	123.108	0.635521	-0.653987	0.000156561	0.00179491
Potra001373g11735	121.223	148.23	94.2152	0.635599	-0.653811	0.00158391	0.012721
Potra004033g24350	106.122	129.749	82.4959	0.635812	-0.653328	0.000917795	0.00803907
Potra173170g27632	94.226	115.204	73.248	0.635812	-0.653328	0.000820264	0.00730418
Potra001036g08738	310.015	379.004	241.026	0.635947	-0.653022	3.15e-06	5.69e-05
Potra000858g06947	145.589	177.979	113.2	0.636033	-0.652826	0.000274063	0.002904
Potra002395g18221	2775.4	3392.81	2157.99	0.636046	-0.652797	1.37e-10	5.06e-09
Potra001024g08560	56.7896	69.4179	44.1612	0.636165	-0.652528	0.00747698	0.0448264
Potra001206g10433	1103.17	1348.42	857.912	0.636234	-0.652371	1.46e-08	4.08e-07
Potra002246g17255	886.056	1082.85	689.262	0.636526	-0.651708	5.85e-08	1.48e-06
Potra000874g07029	150.761	184.233	117.289	0.636631	-0.651471	0.00041144	0.00410938
Potra000391g01793	98.4526	120.289	76.6166	0.63694	-0.650771	0.00135782	0.0112022
Potra001658g13616	223.777	273.385	174.17	0.637085	-0.650441	2.17e-05	0.000315055
Potra001733g14104	72.7053	88.8127	56.5978	0.637272	-0.650019	0.00795111	0.0470725
Potra002433g18458	165.561	202.211	128.911	0.637506	-0.649489	0.00026609	0.00283463
Potra000759g05994	109.657	133.902	85.4107	0.637858	-0.648693	0.000737535	0.00669166
Potra003648g22285	89.6261	109.419	69.8329	0.638214	-0.647888	0.00266708	0.0196888
Potra000569g04194	114.867	140.215	89.5195	0.638444	-0.647369	0.000427675	0.0042517
Potra003590g22103	109.794	134.021	85.5671	0.638459	-0.647334	0.000557164	0.00531138
Potra003577g34804	240.615	293.701	187.529	0.638505	-0.64723	0.000235136	0.00255076
Potra000516g03427	98.3456	120.042	76.6488	0.638514	-0.647209	0.00270677	0.019938
Potra001079g09328	110.619	135.015	86.2226	0.638617	-0.646978	0.00185648	0.0145692
Potra001953g15429	661.55	807.21	515.89	0.639102	-0.645881	1.52e-06	2.94e-05
Potra003898g23397	149.381	182.269	116.492	0.639123	-0.645834	0.000206235	0.00228079
Potra001235g10610	72.6876	88.689	56.6862	0.639156	-0.645759	0.00746143	0.0447573
Potra008928g26258	122.9	149.953	95.8471	0.639181	-0.645703	0.000462956	0.00455366
Potra001653g13557	143.523	175.107	111.939	0.639261	-0.645524	0.000311952	0.00324011
Potra000351g01280	261.925	319.548	204.302	0.639347	-0.645329	0.00704548	0.0428861
Potra001091g09502	321.349	392.044	250.654	0.639353	-0.645316	4.09e-05	0.000550908
Potra000007g00035	438.473	534.78	342.166	0.639827	-0.644247	2.01e-06	3.8e-05
Potra002683g19746	394.334	480.887	307.781	0.640029	-0.643791	7.29e-07	1.51e-05
Potra010375g26576	71.5542	87.2595	55.8489	0.640032	-0.643783	0.00737898	0.0443759
Potra002386g18174	134.119	163.554	104.685	0.640062	-0.643715	0.000727832	0.00662305
Potra172950g27614	261.294	318.637	203.951	0.640073	-0.643692	4.64e-05	0.000615062
Potra000409g01998	60.2142	73.4258	47.0026	0.640138	-0.643545	0.00749587	0.0449107
Potra002768g19939	62.9514	76.7634	49.1395	0.640143	-0.643534	0.00379803	0.026299
Potra002061g16076	220.27	268.576	171.964	0.640282	-0.643222	9.03e-05	0.00110626
Potra169691g27460	92.3373	112.577	72.0977	0.640431	-0.642886	0.00101499	0.00875259
Potra002057g16045	6077.06	7408.78	4745.33	0.640501	-0.642727	1.2e-10	4.46e-09
Potra170040g27489	141.262	172.206	110.319	0.640622	-0.642455	0.00236081	0.0177322
Potra001477g12353	75.5846	92.1212	59.0479	0.640981	-0.641648	0.0058757	0.0371634
Potra003843g23091	222.605	271.306	173.904	0.64099	-0.641626	4.68e-05	0.000619058
Potra002437g18487	108.123	131.76	84.4853	0.641204	-0.641144	0.00433122	0.0292134
Potra002042g15967	104.105	126.861	81.3495	0.641249	-0.641044	0.00635412	0.0395247
Potra000997g08285	540.381	658.456	422.306	0.641358	-0.640798	2.75e-07	6.19e-06
Potra000988g33594	602.286	733.795	470.776	0.641563	-0.640338	1.36e-05	0.000209934
Potra000487g03016	729.161	888.185	570.137	0.641912	-0.639552	2.18e-07	4.99e-06
Potra002311g17626	29367.7	35767.3	22968.1	0.642155	-0.639007	2.35e-08	6.32e-07
Potra003430g21640	451.792	550.204	353.38	0.642271	-0.638746	1.04e-06	2.09e-05
Potra001368g11696	153.606	186.998	120.215	0.64287	-0.637401	0.000246884	0.00266161
Potra185768g28384	458.41	558.039	358.78	0.64293	-0.637267	0.000259017	0.00277201
Potra001604g13229	334.768	407.435	262.101	0.643296	-0.636444	2.39e-06	4.43e-05
Potra000423g02204	93.4911	113.77	73.2126	0.643516	-0.635952	0.00226786	0.0171591
Potra001062g09122	207.474	252.447	162.501	0.643701	-0.635537	0.000163508	0.00186457
Potra000545g03875	3027.85	3684.16	2371.55	0.643715	-0.635506	2.83e-10	1.01e-08
Potra001872g14971	872.057	1061.07	683.049	0.643739	-0.635452	4.71e-08	1.21e-06
Potra000417g02113	104.589	127.243	81.9356	0.64393	-0.635025	0.0010001	0.00863489
Potra004197g24679	514.121	625.465	402.778	0.643965	-0.634945	8.72e-07	1.78e-05
Potra000548g03931	276.629	336.521	216.737	0.644051	-0.634754	9.92e-06	0.000159392
Potra001381g11788	252.896	307.614	198.177	0.64424	-0.634331	1.53e-05	0.000231906
Potra000678g05254	67.1195	81.63	52.6089	0.64448	-0.633792	0.00539876	0.0347387
Potra001052g08982	79.7567	96.9946	62.5189	0.644561	-0.633611	0.00301157	0.0217402
Potra001019g08511	182.717	222.159	143.275	0.644922	-0.632804	0.000133373	0.00155402
Potra002407g18304	128.929	156.732	101.126	0.645215	-0.632148	0.00126021	0.0105122
Potra001732g14093	186.322	226.475	146.17	0.645415	-0.631701	4.68e-05	0.000619072
Potra002505g18920	129.865	157.788	101.943	0.646072	-0.630233	0.000422665	0.00421092
Potra003360g21448	64.5332	78.4064	50.66	0.64612	-0.630125	0.00837266	0.0490333
Potra001828g14729	145.379	176.621	114.136	0.646221	-0.6299	0.000465748	0.00457304
Potra003351g21420	77.6697	94.3513	60.9882	0.646395	-0.629512	0.00582561	0.0369225
Potra170016g27487	223.472	271.376	175.569	0.646958	-0.628257	3.8e-05	0.000514625
Potra000772g06089	149.616	181.661	117.571	0.6472	-0.627716	0.000113068	0.00134388
Potra001413g11990	228.015	276.84	179.19	0.647269	-0.627564	6e-05	0.00077042
Potra000707g05529	1176.23	1428.02	924.433	0.647353	-0.627375	1.65e-08	4.55e-07
Potra000269g01014	89.1364	108.213	70.0593	0.647418	-0.62723	0.00213511	0.0163053
Potra001393g11840	160.741	195.142	126.34	0.647426	-0.627212	0.000312276	0.00324226
Potra002003g15725	746.78	906.52	587.04	0.647575	-0.626881	1.28e-07	3.03e-06
Potra000672g05209	126.938	154.065	99.8107	0.647846	-0.626278	0.00459495	0.0306637
Potra001429g12067	67.0087	81.3129	52.7045	0.648169	-0.625558	0.0036544	0.0254819
Potra000775g06113	262.663	318.693	206.632	0.648373	-0.625105	2.31e-05	0.000333721
Potra003687g22444	346.359	420.202	272.517	0.648537	-0.624739	5.19e-06	8.93e-05
Potra001647g13503	806.764	978.551	634.976	0.648894	-0.623944	0.00017665	0.00199806
Potra003274g21195	142.753	173.124	112.381	0.649137	-0.623406	0.000299353	0.0031306
Potra000065g00247	123.049	149.211	96.8877	0.649334	-0.622967	0.00190305	0.0148885
Potra161383g26932	106.679	129.342	84.0148	0.649553	-0.62248	0.00156119	0.0125708
Potra001012g08440	292.821	354.991	230.651	0.649738	-0.622071	2.03e-05	0.000297895
Potra002488g18808	348.095	421.947	274.242	0.649943	-0.621614	1.09e-05	0.000173309
Potra003767g22766	259.674	314.756	204.591	0.649997	-0.621495	6.07e-05	0.000777918
Potra000954g07828	282.508	342.364	222.651	0.650334	-0.620748	1.93e-05	0.000284116
Potra001054g09018	89.8134	108.824	70.8026	0.650615	-0.620125	0.00325501	0.0231908
Potra000391g01795	270.948	328.098	213.798	0.65163	-0.617875	5.56e-05	0.00072242
Potra002063g16080	643.361	778.996	507.725	0.651769	-0.617568	5.29e-07	1.13e-05
Potra000089g00301	216.434	262.045	170.823	0.651884	-0.617313	0.000107175	0.0012826
Potra000618g04698	126.676	153.371	99.9802	0.651884	-0.617313	0.000976322	0.00846633
Potra002322g17741	175.97	213.038	138.901	0.652002	-0.617052	0.000365853	0.00372082
Potra000454g02585	217.282	263.017	171.548	0.652233	-0.616541	0.000105894	0.00126891
Potra000936g07646	124.472	150.644	98.3011	0.65254	-0.615862	0.000684543	0.00629292
Potra000808g06411	99.6282	120.543	78.7131	0.652986	-0.614876	0.00282275	0.0206231
Potra000141g00492	88.4732	107.017	69.9292	0.653439	-0.613875	0.00201784	0.0155678
Potra000862g06971	163.467	197.723	129.211	0.653497	-0.613748	0.000631051	0.00588868
Potra002641g19639	7675.34	9282.9	6067.79	0.653652	-0.613405	2.2e-08	5.95e-07
Potra001546g12814	231.12	279.434	182.805	0.654198	-0.612202	9.57e-05	0.00116316
Potra002540g19130	101.687	122.937	80.4372	0.654297	-0.611981	0.0033275	0.0235841
Potra002317g17672	1478.74	1787.05	1170.42	0.654948	-0.610547	9.48e-09	2.73e-07
Potra000926g07522	123.676	149.46	97.8922	0.654971	-0.610496	0.00311349	0.0223484
Potra001180g10223	148.124	178.975	117.273	0.655249	-0.609885	0.000329494	0.00339948
Potra001607g13251	100.335	121.172	79.4975	0.656073	-0.608072	0.0038532	0.0266016
Potra003547g21985	2915.2	3520.32	2310.09	0.656215	-0.607759	4.65e-09	1.4e-07
Potra192299g28799	914.901	1104.75	725.051	0.656302	-0.607568	4.09e-07	8.89e-06
Potra001077g09303	302.823	365.646	240	0.656372	-0.607414	7.96e-05	0.000989102
Potra001246g10698	126.844	153.154	100.535	0.656433	-0.607281	0.00118457	0.00996781
Potra000404g01934	121.883	147.162	96.6046	0.656451	-0.60724	0.00162525	0.0130001
Potra001064g09152	82.6709	99.8132	65.5285	0.656512	-0.607108	0.00625015	0.0389826
Potra001178g10202	223.169	269.439	176.9	0.656549	-0.607026	4.47e-05	0.000595075
Potra002325g17784	347.243	419.157	275.33	0.656867	-0.606328	1.32e-05	0.000204394
Potra000657g05065	1130.13	1364.13	896.131	0.656923	-0.606204	1.52e-06	2.94e-05
Potra193682g28899	151.902	183.321	120.483	0.657224	-0.605543	0.000289133	0.00304054
Potra004458g24942	76.4297	92.2309	60.6284	0.657355	-0.605256	0.00378886	0.0262486
Potra004018g24268	81.5858	98.4494	64.7221	0.657415	-0.605123	0.00527968	0.0341621
Potra001083g09384	433.309	522.754	343.864	0.657792	-0.604298	4.68e-06	8.13e-05
Potra002163g16708	201.667	243.227	160.108	0.658268	-0.603253	0.000230422	0.00250646
Potra001570g13008	366.8	442.384	291.216	0.658287	-0.603211	5.79e-06	9.9e-05
Potra001665g13689	152.479	183.897	121.061	0.658308	-0.603166	0.000868785	0.00764816
Potra001237g10616	544.755	656.901	432.61	0.658562	-0.60261	9.44e-07	1.91e-05
Potra002176g31676	79.1665	95.4605	62.8725	0.658623	-0.602475	0.00805966	0.0475516
Potra000824g06571	188.532	227.25	149.814	0.659249	-0.601105	0.000340527	0.0034926
Potra174349g27713	7072.5	8524.64	5620.35	0.659307	-0.600978	2e-07	4.6e-06
Potra003383g21512	172.519	207.911	137.126	0.659543	-0.600462	0.000403502	0.0040417
Potra002115g16426	159.652	192.371	126.933	0.659836	-0.599821	0.000531686	0.00510697
Potra001920g15237	202.624	244.139	161.109	0.659906	-0.599668	0.000148275	0.0017106
Potra002255g17314	79.9249	96.2925	63.5574	0.660045	-0.599364	0.00532485	0.0343426
Potra003299g21278	613.121	738.354	487.889	0.660779	-0.59776	7.59e-06	0.000125848
Potra001646g13498	120.112	144.633	95.5914	0.660923	-0.597446	0.00119454	0.0100366
Potra001805g35577	83.4673	100.503	66.4312	0.660986	-0.597309	0.00853704	0.0498295
Potra003609g22165	89.1841	107.36	71.0086	0.661409	-0.596385	0.00677254	0.0415426
Potra000759g05995	158.241	190.484	125.998	0.661459	-0.596276	0.000465495	0.00457217
Potra003807g22930	500.692	602.527	398.857	0.661974	-0.595154	2.92e-06	5.31e-05
Potra000531g03697	676.159	813.56	538.758	0.662223	-0.594611	9.15e-07	1.86e-05
Potra002505g18910	112.038	134.796	89.2796	0.662333	-0.594372	0.0055322	0.0354989
Potra002943g20363	1746.29	2100.92	1391.66	0.662405	-0.594216	1.94e-08	5.27e-07
Potra003348g21413	1261.7	1517.89	1005.51	0.662435	-0.59415	1.04e-07	2.48e-06
Potra000660g05085	119.505	143.749	95.2615	0.662693	-0.593588	0.00280628	0.0205513
Potra001311g11278	332.385	399.727	265.043	0.663061	-0.592787	3.22e-05	0.00044677
Potra001359g11631	1173.7	1411.36	936.034	0.663215	-0.592451	0.0013311	0.011021
Potra001796g14561	1386.91	1667.36	1106.46	0.663598	-0.59162	5.38e-08	1.37e-06
Potra001660g13629	693.971	834.3	553.641	0.6636	-0.591614	9.14e-07	1.86e-05
Potra001368g11687	83.2196	100.023	66.4162	0.664008	-0.590727	0.00727011	0.0438618
Potra003123g20799	138.948	166.99	110.907	0.664156	-0.590406	0.00258683	0.0191763
Potra003875g23278	82.6015	99.2509	65.9521	0.664499	-0.589661	0.00715867	0.0433759
Potra001178g10211	80.798	97.0815	64.5145	0.66454	-0.589572	0.00620526	0.0387721
Potra002020g15836	5884.58	7070.46	4698.7	0.664553	-0.589544	7.9e-09	2.31e-07
Potra000915g07418	270.205	324.656	215.753	0.664558	-0.589534	0.00033611	0.00345365
Potra000389g01777	161.56	194.111	129.009	0.664612	-0.589415	0.00077305	0.0069527
Potra000354g01365	479.983	576.679	383.288	0.664647	-0.58934	3.72e-06	6.62e-05
Potra002818g20041	172.446	207.137	137.755	0.665046	-0.588475	0.000363243	0.00369563
Potra001171g10140	183.903	220.794	147.013	0.665836	-0.586761	0.000498348	0.00482505
Potra188707g28630	127.776	153.4	102.151	0.665911	-0.586599	0.0021269	0.0162471
Potra002589g19465	158.822	190.647	126.997	0.666138	-0.586106	0.000464003	0.00456073
Potra002760g19924	207.359	248.88	165.838	0.666335	-0.58568	0.000216129	0.0023723
Potra000093g00312	80.4772	96.5574	64.3969	0.666929	-0.584394	0.00671364	0.0413074
Potra003370g21471	298.894	358.6	239.189	0.667009	-0.584223	4.85e-05	0.000638259
Potra003831g23039	84.0659	100.851	67.2811	0.667135	-0.583949	0.00495514	0.0324601
Potra001065g09153	580.641	696.568	464.715	0.667149	-0.583919	2.05e-06	3.87e-05
Potra187073g28479	384.237	460.894	307.581	0.667358	-0.583468	9.68e-06	0.000155981
Potra000656g05061	2817.05	3378.93	2255.18	0.667423	-0.583326	9.77e-09	2.8e-07
Potra000792g06272	389.509	467.195	311.823	0.667436	-0.583299	7.49e-06	0.000124511
Potra000532g03711	200.762	240.766	160.758	0.667692	-0.582745	0.000398856	0.00399948
Potra170668g27534	88.1386	105.701	70.5762	0.667696	-0.582736	0.00612	0.0384031
Potra003510g21853	144.819	173.672	115.966	0.66773	-0.582663	0.0011705	0.00987787
Potra001546g12821	134.931	161.79	108.072	0.667978	-0.582128	0.0030459	0.0219539
Potra000669g05184	81.8463	98.1364	65.5562	0.668011	-0.582056	0.00531631	0.0343114
Potra002376g18106	667.261	800.003	534.519	0.668146	-0.581764	1.86e-06	3.53e-05
Potra009301g26332	268.406	321.678	215.134	0.668787	-0.580381	0.000136757	0.00159146
Potra001027g08593	134.525	161.222	107.827	0.668807	-0.580339	0.000929839	0.00813164
Potra000455g02610	143.748	172.24	115.256	0.669159	-0.57958	0.00196584	0.0152767
Potra001053g08987	106.275	127.3	85.2506	0.669683	-0.578449	0.0029925	0.0216219
Potra161143g26908	146.856	175.868	117.844	0.670072	-0.577612	0.000679253	0.00625254
Potra001298g11178	103.22	123.608	82.8321	0.670117	-0.577516	0.00349504	0.0245305
Potra001242g10676	99.3444	118.958	79.731	0.670247	-0.577236	0.00394288	0.0270931
Potra000592g04479	119.544	143.134	95.9542	0.670378	-0.576953	0.00503826	0.0329002
Potra002587g19448	160.732	192.448	129.016	0.670396	-0.576914	0.00068191	0.00627492
Potra000689g05355	131.252	157.131	105.374	0.67061	-0.576455	0.0012853	0.0106894
Potra001832g14743	170.536	204.146	136.927	0.670731	-0.576193	0.000559584	0.00532532
Potra002539g19125	748.607	896.128	601.085	0.670757	-0.576137	6.74e-07	1.41e-05
Potra000640g33102	86.0867	103.022	69.1511	0.671225	-0.575131	0.00345036	0.0243222
Potra003673g22392	197.535	236.362	158.708	0.671461	-0.574625	0.000446472	0.00441609
Potra000697g05427	208.925	249.96	167.891	0.671672	-0.574171	0.000337746	0.00346791
Potra000943g07718	172.503	206.339	138.667	0.672035	-0.573393	0.000725394	0.00660519
Potra001650g13529	537.524	642.9	432.148	0.672185	-0.573069	0.000366813	0.00372922
Potra000588g04417	128.841	154.06	103.622	0.672605	-0.572168	0.00162154	0.0129817
Potra002060g16071	983.7	1176.05	791.348	0.672885	-0.571567	9.27e-07	1.88e-05
Potra001983g15611	171.228	204.655	137.801	0.673334	-0.570606	0.00137727	0.0113492
Potra000391g01797	114.339	136.641	92.0382	0.673579	-0.570082	0.00317723	0.0227101
Potra000536g03755	3372.34	4029.24	2715.44	0.673934	-0.569321	5.36e-08	1.37e-06
Potra003645g22275	124.306	148.511	100.101	0.674032	-0.569112	0.00277302	0.0203506
Potra004072g24439	194.954	232.871	157.037	0.674349	-0.568432	0.000446591	0.00441609
Potra003590g22102	82.3327	98.3359	66.3294	0.674519	-0.568069	0.00795152	0.0470725
Potra001556g12885	268.952	321.206	216.697	0.674637	-0.567817	0.000102196	0.00122936
Potra000493g03142	172.543	206.05	139.036	0.674769	-0.567534	0.000574224	0.00544603
Potra003433g21652	156.001	186.274	125.728	0.674962	-0.567122	0.00084346	0.00745046
Potra002337g17861	207.14	247.278	167.002	0.67536	-0.566272	0.000232733	0.00252863
Potra000721g05646	260.876	311.406	210.346	0.675473	-0.566029	0.000203543	0.0022582
Potra000997g08280	462.489	552.046	372.933	0.675547	-0.565871	9.16e-05	0.00112015
Potra004208g24686	141.55	168.947	114.153	0.675672	-0.565604	0.000841492	0.00744084
Potra003893g23381	117.492	140.231	94.7519	0.675683	-0.565581	0.00205155	0.0157797
Potra000741g05846	105.082	125.419	84.7456	0.675698	-0.565549	0.00382477	0.0264447
Potra000013g00066	944.91	1127.78	762.04	0.675699	-0.565548	7.99e-07	1.64e-05
Potra004005g24128	171.255	204.291	138.219	0.676578	-0.563672	0.000790401	0.00708358
Potra003357g21439	1927.36	2299.1	1555.61	0.676619	-0.563585	0.000970559	0.00842948
Potra001296g11158	182.137	217.255	147.018	0.676709	-0.563392	0.000944485	0.00823385
Potra001471g12332	100.16	119.471	80.8484	0.67672	-0.563368	0.005405	0.0347709
Potra001439g12110	366.813	437.475	296.151	0.676955	-0.562868	3.27e-05	0.000452132
Potra003627g22211	289.302	344.964	233.64	0.677288	-0.56216	0.000114947	0.0013633
Potra000028g00136	329.383	392.755	266.011	0.677297	-0.56214	0.00033351	0.00343328
Potra000721g05643	188.905	225.246	152.563	0.677319	-0.562093	0.000628799	0.00587161
Potra000069g00253	121.961	145.423	98.4998	0.677333	-0.562063	0.00305892	0.022042
Potra003661g22351	267.687	319.157	216.217	0.677463	-0.561787	0.00011358	0.00134939
Potra000493g03135	216.374	257.972	174.776	0.677501	-0.561705	0.000334459	0.0034405
Potra001367g11684	112.555	134.191	90.9193	0.677537	-0.561628	0.00483502	0.0319231
Potra002947g20370	1661.59	1980.8	1342.38	0.677696	-0.561291	6.76e-08	1.68e-06
Potra002442g18509	129.468	154.305	104.63	0.678073	-0.560488	0.00227566	0.0172093
Potra000010g00056	3484.17	4152.23	2816.1	0.678214	-0.560187	3.88e-08	1.01e-06
Potra001975g15566	133.188	158.697	107.68	0.678527	-0.559522	0.00224048	0.0169981
Potra189447g31442	80.1652	95.4979	64.8326	0.678891	-0.558749	0.00793137	0.0469835
Potra009484g26369	337.677	402.239	273.115	0.678988	-0.558541	0.00014929	0.00171934
Potra008147g26104	118.46	141.096	95.8234	0.679134	-0.558232	0.00398501	0.0273017
Potra001613g13291	312.094	371.688	252.501	0.679335	-0.557804	0.000101531	0.00122294
Potra004029g24344	139.125	165.647	112.602	0.679772	-0.556877	0.001035	0.00888107
Potra000993g08219	132.117	157.29	106.945	0.679926	-0.55655	0.00247728	0.0184823
Potra000728g05717	1052.66	1253.12	852.189	0.680053	-0.556281	6.15e-07	1.29e-05
Potra002567g19330	173.434	206.462	140.407	0.680062	-0.556261	0.000760983	0.00685969
Potra002302g17568	123.004	146.419	99.5889	0.680164	-0.556045	0.0038668	0.0266797
Potra001016g08482	208.427	248.09	168.764	0.680254	-0.555856	0.00104507	0.00895644
Potra000357g01410	123.436	146.923	99.9486	0.680277	-0.555805	0.00771817	0.0458968
Potra003281g21222	143.864	171.203	116.525	0.680622	-0.555075	0.00242852	0.0181721
Potra001757g14303	256.991	305.808	208.174	0.680733	-0.554838	0.000354768	0.00361866
Potra003186g20937	1443.91	1718.13	1169.69	0.680793	-0.554712	7.27e-07	1.51e-05
Potra004493g24986	1540.24	1832.66	1247.81	0.680873	-0.554542	1.03e-06	2.07e-05
Potra001270g10975	149.042	177.327	120.756	0.680977	-0.554322	0.00754882	0.0451502
Potra000640g04887	149.965	178.352	121.578	0.681675	-0.552843	0.0020815	0.0159748
Potra182577g28239	129.407	153.892	104.922	0.68179	-0.5526	0.00348802	0.0244983
Potra168242g27352	99.0111	117.717	80.3055	0.682193	-0.551749	0.00555678	0.0356334
Potra001570g12997	265.232	315.299	215.164	0.682412	-0.551285	0.000748054	0.00676505
Potra003972g23880	143.986	171.043	116.928	0.683615	-0.548744	0.00364207	0.0254218
Potra003599g22119	97.2862	115.552	79.02	0.683846	-0.548257	0.0083721	0.0490333
Potra000518g03456	127.464	151.359	103.57	0.684263	-0.547376	0.00178942	0.0141346
Potra001190g10303	127.043	150.855	103.231	0.684308	-0.547283	0.00195316	0.0151994
Potra001058g09074	184.078	218.534	149.621	0.684656	-0.546549	0.00181593	0.0143034
Potra000883g07138	114.426	135.803	93.049	0.685174	-0.545457	0.00436869	0.029395
Potra002213g17042	109.382	129.811	88.9521	0.685242	-0.545314	0.00535461	0.0345025
Potra001662g13654	202.973	240.883	165.064	0.685243	-0.545312	0.00295177	0.021414
Potra000017g00096	190.033	225.487	154.579	0.685534	-0.5447	0.000936796	0.00818802
Potra003405g21572	295.122	350.171	240.074	0.68559	-0.544583	0.00401083	0.0274381
Potra002388g18184	116.39	138.067	94.7123	0.685987	-0.543746	0.0038281	0.0264545
Potra000710g05558	107.18	127.129	87.2304	0.686159	-0.543386	0.00418731	0.0284426
Potra001617g13312	173.16	205.348	140.972	0.686502	-0.542664	0.00342554	0.0242014
Potra002820g20055	121.615	144.193	99.0381	0.686845	-0.541944	0.00706859	0.042961
Potra001262g10892	114.479	135.717	93.24	0.687017	-0.541583	0.00300189	0.0216759
Potra003853g23167	205.035	243.072	166.998	0.68703	-0.541555	0.000297805	0.0031176
Potra001006g08371	254.149	301.297	207.002	0.687037	-0.54154	0.000480014	0.00468501
Potra004067g24424	117.641	139.462	95.8195	0.687063	-0.541486	0.00397481	0.027252
Potra000406g01979	139.804	165.681	113.927	0.687628	-0.5403	0.00330575	0.0234682
Potra000365g01475	3650.59	4325.72	2975.45	0.68785	-0.539834	1.38e-06	2.7e-05
Potra002402g18269	7321.57	8675.58	5967.56	0.687857	-0.539819	1.54e-05	0.000232815
Potra001181g10251	144.68	171.411	117.948	0.6881	-0.539311	0.00468635	0.0311409
Potra001660g13631	3560.09	4217.31	2902.86	0.688322	-0.538844	1.95e-07	4.49e-06
Potra002496g18852	96.5501	114.358	78.7423	0.68856	-0.538345	0.00850618	0.0497119
Potra002127g16494	151.527	179.437	123.618	0.68892	-0.537592	0.00249648	0.0186006
Potra200831g29541	147.82	175.042	120.599	0.688971	-0.537486	0.00419837	0.0285038
Potra001911g15163	127.405	150.866	103.944	0.688987	-0.53745	0.00458529	0.030612
Potra001990g15660	402.097	476.102	328.091	0.68912	-0.537174	5.88e-05	0.000759431
Potra000729g05743	909.157	1076.42	741.892	0.689221	-0.536961	2.66e-06	4.89e-05
Potra002599g19526	2453.01	2904.06	2001.96	0.689368	-0.536653	1.44e-07	3.38e-06
Potra004538g25042	267.934	317.093	218.774	0.689937	-0.535464	0.00012851	0.00150366
Potra002309g17619	156.547	185.257	127.838	0.690062	-0.535203	0.00207822	0.0159541
Potra001604g13226	854.154	1010.71	697.597	0.690205	-0.534903	6.21e-06	0.000105467
Potra003973g23890	258.026	305.303	210.748	0.69029	-0.534725	0.000193145	0.00215572
Potra003161g20873	170.24	201.422	139.058	0.690383	-0.534532	0.00163269	0.0130522
Potra182803g28255	192.528	227.761	157.294	0.690607	-0.534063	0.000569412	0.00540777
Potra000520g03484	130.11	153.893	106.327	0.69092	-0.533409	0.00346108	0.0243905
Potra008680g26208	109.433	129.433	89.4335	0.690961	-0.533323	0.00530389	0.0342504
Potra000598g04538	577.017	682.447	471.588	0.691025	-0.533191	1.64e-05	0.000246482
Potra002318g17680	231.521	273.816	189.227	0.691072	-0.533093	0.000954835	0.00831627
Potra002323g17771	232.994	275.538	190.451	0.691199	-0.532827	0.000489791	0.00476041
Potra000204g00874	123.28	145.783	100.776	0.691278	-0.532661	0.00368649	0.0256479
Potra002351g17944	188.864	223.271	154.458	0.691795	-0.531583	0.0011047	0.00939729
Potra000419g02160	366.213	432.916	299.51	0.691844	-0.531482	8.29e-05	0.00102485
Potra000404g01906	127.201	150.35	104.053	0.69207	-0.53101	0.00288656	0.0210286
Potra001569g12975	108.589	128.295	88.8828	0.692799	-0.529491	0.00468089	0.0311195
Potra000299g01088	364.48	430.6	298.36	0.692893	-0.529296	0.000107395	0.00128435
Potra164314g27164	401.213	473.87	328.556	0.693347	-0.528351	7.33e-05	0.000919666
Potra003852g23161	256.941	303.459	210.423	0.693414	-0.52821	0.000433673	0.00430211
Potra000997g08301	595.383	703.027	487.738	0.693768	-0.527474	1.35e-05	0.000208674
Potra001952g15420	195.537	230.866	160.208	0.693942	-0.527112	0.00146707	0.0119582
Potra000892g07227	188.386	222.415	154.358	0.694007	-0.526977	0.00128898	0.0107073
Potra000187g00763	777.524	917.781	637.266	0.694355	-0.526255	3.7e-05	0.000502883
Potra000434g02346	110.729	130.695	90.7639	0.694472	-0.526011	0.00717477	0.0434451
Potra194901g28996	160.025	188.861	131.189	0.694631	-0.525682	0.00671359	0.0413074
Potra001409g11957	595.127	702.333	487.922	0.694716	-0.525504	1.17e-05	0.000183861
Potra000829g06647	443.183	523.001	363.366	0.694771	-0.52539	0.000145288	0.0016809
Potra177213g27939	147.727	174.324	121.13	0.694855	-0.525217	0.00404037	0.0275994
Potra199506g33738	126.365	149.095	103.634	0.695088	-0.524731	0.0032594	0.0232162
Potra000150g00530	248.762	293.501	204.022	0.69513	-0.524646	0.000331405	0.00341667
Potra000561g04073	117.53	138.648	96.412	0.69537	-0.524147	0.00580264	0.0368352
Potra001272g10994	13104.7	15459.2	10750.1	0.695387	-0.524111	2.48e-05	0.000354629
Potra002056g16030	442.849	522.163	363.534	0.696208	-0.522409	4.58e-05	0.000607799
Potra001097g09573	227.631	268.373	186.889	0.696376	-0.522062	0.000992022	0.00858375
Potra000902g07324	1317.74	1553.41	1082.06	0.696572	-0.521657	0.00106142	0.00906313
Potra002153g16656	200.34	236.121	164.559	0.69693	-0.520915	0.00214234	0.0163515
Potra003978g23938	533.263	628.335	438.192	0.697385	-0.519972	1.77e-05	0.000263641
Potra002175g16772	109.462	128.973	89.9503	0.697433	-0.519874	0.00389771	0.0268175
Potra002465g18676	101.462	119.542	83.3828	0.697519	-0.519695	0.00741204	0.0445522
Potra002594g19501	3447.1	4061.03	2833.16	0.697645	-0.519436	2.76e-07	6.22e-06
Potra001321g11337	280.661	330.503	230.82	0.698389	-0.517898	0.000216904	0.00237894
Potra000687g05342	290.09	341.555	238.624	0.698641	-0.517378	0.000333122	0.00343228
Potra001027g08599	257.458	303.034	211.882	0.699201	-0.516221	0.000804209	0.00718031
Potra000943g07725	327.325	385.08	269.571	0.700038	-0.514495	0.000560586	0.00532939
Potra002463g31873	2574.64	3028.36	2120.91	0.70035	-0.513852	1.18e-06	2.35e-05
Potra002926g20332	107.239	126.085	88.3927	0.701059	-0.512393	0.00806685	0.0475803
Potra001613g13289	253.608	298.161	209.055	0.701149	-0.512208	0.000788024	0.00706456
Potra000174g00655	220.222	258.906	181.538	0.701172	-0.512159	0.000739858	0.00671055
Potra001570g12999	14105.4	16580.7	11630	0.70142	-0.511649	3.71e-07	8.11e-06
Potra003721g22562	754.67	887.037	622.303	0.701553	-0.511376	1.52e-05	0.000231484
Potra001092g09506	139.092	163.481	114.704	0.701631	-0.511215	0.0066953	0.0412415
Potra000797g06327	634.335	745.51	523.159	0.701747	-0.510977	1.67e-05	0.000249546
Potra001024g08562	8193.29	9628	6758.58	0.701971	-0.510517	3.33e-07	7.37e-06
Potra004022g24314	131.96	155.045	108.875	0.702211	-0.510023	0.00536297	0.0345324
Potra003878g23299	327.084	384.248	269.92	0.702462	-0.509509	0.000357763	0.00364654
Potra002308g17611	204.453	240.042	168.864	0.70348	-0.507419	0.00119943	0.0100655
Potra001722g14017	196.421	230.595	162.247	0.703603	-0.507167	0.00271415	0.0199833
Potra000696g05408	1018.5	1195.56	841.437	0.703801	-0.50676	5.47e-06	9.38e-05
Potra000413g02042	283.859	333.162	234.556	0.70403	-0.506292	0.00060348	0.00568476
Potra001935g15337	841.621	987.467	695.776	0.704607	-0.50511	2.33e-05	0.000335525
Potra000959g07875	222.915	261.523	184.306	0.70474	-0.504836	0.00328523	0.0233642
Potra000621g04718	486.436	570.647	402.224	0.704856	-0.5046	8.13e-05	0.00100746
Potra000523g03543	150.212	176.215	124.209	0.704872	-0.504568	0.00566968	0.036176
Potra000935g07636	3204.19	3758.48	2649.9	0.705045	-0.504213	9.16e-07	1.86e-05
Potra003906g23455	703.632	825.264	582	0.705228	-0.503838	2.85e-05	0.000400894
Potra000375g01603	3892.59	4565.33	3219.85	0.705282	-0.503727	1.1e-06	2.2e-05
Potra000487g03018	180.02	211.128	148.913	0.705322	-0.503646	0.00181348	0.0142939
Potra000823g06565	207.937	243.764	172.11	0.706051	-0.502156	0.00135189	0.0111599
Potra001057g09066	284.692	333.7	235.685	0.706278	-0.501693	0.000535326	0.00513485
Potra000659g05075	1163.76	1364.09	963.427	0.70628	-0.501689	9.42e-06	0.0001526
Potra004039g24362	482.354	565.354	399.355	0.706381	-0.501482	0.000104216	0.00125095
Potra003868g23245	260.889	305.778	216.001	0.706398	-0.501447	0.000589076	0.00557231
Potra001642g13480	198.564	232.725	164.403	0.706426	-0.501389	0.00181102	0.0142849
Potra001309g11247	645.386	756.309	534.464	0.706674	-0.500883	9.44e-05	0.00114995
Potra002412g18341	532.86	624.4	441.321	0.706792	-0.500642	0.000125735	0.0014757
Potra000767g06056	232.326	272.187	192.465	0.707107	-0.5	0.00185149	0.0145423
Potra003888g23351	154.996	128.375	181.618	1.41474	0.50054	0.00357471	0.025014
Potra001638g13464	221.639	183.568	259.71	1.41479	0.500583	0.000623795	0.00583894
Potra003951g32461	775.595	642.222	908.968	1.41535	0.501157	2.39e-05	0.000342933
Potra000619g04709	1278.27	1058.33	1498.22	1.41565	0.50146	8.31e-06	0.000135844
Potra000172g00646	246.067	203.657	288.476	1.41648	0.502312	0.00145521	0.0118808
Potra000908g07361	1936.59	1602.81	2270.37	1.41649	0.502325	9.43e-06	0.0001527
Potra007201g25913	159.343	131.845	186.84	1.41712	0.502962	0.00444382	0.0298139
Potra000392g01801	282.699	233.839	331.559	1.4179	0.503755	0.000187447	0.00210118
Potra003352g21426	2226.67	1841.64	2611.71	1.41815	0.504007	1.19e-06	2.36e-05
Potra003597g32278	355.692	294.141	417.243	1.41851	0.504381	0.000124219	0.00145959
Potra003981g23957	1447.5	1196.94	1698.07	1.41867	0.504538	9.33e-05	0.0011382
Potra000891g07198	138.087	114.178	161.995	1.41879	0.504664	0.00513153	0.0333897
Potra003978g23937	418.682	346.095	491.27	1.41947	0.505348	0.00050114	0.00484703
Potra172340g27587	123.018	101.685	144.35	1.41958	0.505468	0.00618624	0.0386913
Potra000379g01666	2024.69	1673.58	2375.8	1.4196	0.505481	0.000500093	0.00483857
Potra000696g05413	199.185	164.61	233.76	1.42008	0.505976	0.000938259	0.00819754
Potra000699g05445	1000.21	826.445	1173.97	1.42051	0.506411	5.48e-06	9.39e-05
Potra000872g07020	687.075	567.705	806.446	1.42054	0.506437	0.00294609	0.0213895
Potra000729g05741	271.736	224.52	318.952	1.4206	0.506497	0.00138437	0.0113983
Potra162617g27030	3485.4	2879.6	4091.2	1.42076	0.506658	1.14e-06	2.28e-05
Potra000143g00502	124.402	102.774	146.03	1.42089	0.506791	0.00304267	0.0219362
Potra000834g06695	213.493	176.353	250.633	1.4212	0.507109	0.00216727	0.0165101
Potra001515g12626	1320.56	1090.77	1550.34	1.42133	0.507237	0.00219753	0.0167178
Potra002999g20501	2661.95	2198.54	3125.36	1.42156	0.507474	0.000284783	0.00300132
Potra004087g24476	172.912	142.803	203.022	1.42169	0.507609	0.00181756	0.0143081
Potra000414g02058	136.281	112.549	160.014	1.42172	0.507641	0.00513427	0.0333998
Potra000547g03908	1432.44	1182.92	1681.96	1.42187	0.507789	0.000261877	0.00279227
Potra006505g25700	119.105	98.3563	139.854	1.42191	0.507828	0.00370137	0.025745
Potra002581g19420	393.101	324.519	461.683	1.42267	0.508598	0.000126555	0.00148239
Potra000439g02406	451.497	372.7	530.294	1.42285	0.508779	0.00229409	0.0173245
Potra006707g25757	488.078	402.866	573.29	1.42303	0.508967	0.000641833	0.00596729
Potra181656g28171	323.502	266.976	380.027	1.42345	0.509394	0.000237867	0.00257537
Potra003092g20721	98.7018	81.4369	115.967	1.42401	0.509956	0.00742127	0.0445981
Potra002195g16915	944.292	778.99	1109.59	1.4244	0.510353	7.71e-06	0.000127434
Potra003599g22120	291.31	240.257	342.363	1.42499	0.510951	0.00743648	0.0446702
Potra000805g06393	102.376	84.4239	120.329	1.42529	0.511258	0.00511342	0.0332874
Potra001695g13857	592.753	488.806	696.701	1.42531	0.511279	2.56e-05	0.000365312
Potra003206g20997	1331.92	1098.22	1565.61	1.42559	0.511558	0.00031068	0.00322931
Potra000434g02332	114.758	94.6041	134.912	1.42607	0.512047	0.00413514	0.0281578
Potra000472g02851	623.455	513.935	732.975	1.4262	0.51218	2.46e-05	0.000352634
Potra000543g03829	282.935	233.213	332.657	1.42641	0.512389	0.000227966	0.00248362
Potra004136g24598	628.864	518.32	739.408	1.42655	0.512528	2.84e-05	0.000400341
Potra160839g26885	129.442	106.675	152.209	1.42685	0.512835	0.00529697	0.0342183
Potra000349g01264	964.607	794.872	1134.34	1.42707	0.51306	8.55e-06	0.00013958
Potra002249g17282	2851.54	2349.37	3353.72	1.4275	0.513487	1.18e-06	2.35e-05
Potra000448g02519	612.984	505.024	720.945	1.42755	0.513537	0.000137733	0.0016008
Potra173619g27660	194.136	159.943	228.33	1.42757	0.513564	0.000740631	0.00671319
Potra001933g15320	422.365	347.936	496.795	1.42784	0.51383	0.00013527	0.00157481
Potra001307g11231	96.6738	79.6345	113.713	1.42794	0.513934	0.00491792	0.0322942
Potra003941g23667	277.592	228.633	326.552	1.42828	0.514279	0.0072458	0.0437631
Potra164463g27176	3541.35	2916.25	4166.46	1.4287	0.514704	0.000118059	0.00139486
Potra001508g12586	719.639	592.506	846.771	1.42913	0.515141	9.58e-05	0.00116316
Potra000449g02528	260.497	214.474	306.519	1.42917	0.515174	0.00022405	0.00244671
Potra001020g08516	826.185	680.215	972.156	1.42919	0.515197	2.21e-05	0.000320263
Potra004100g24497	130.463	107.405	153.52	1.42936	0.515372	0.00398299	0.0272945
Potra003612g22169	2668.69	2196.92	3140.45	1.42948	0.515486	9.13e-07	1.86e-05
Potra001081g09342	308.281	253.771	362.79	1.4296	0.515609	0.000605475	0.0056997
Potra003375g21484	179.827	147.999	211.655	1.43012	0.516134	0.00131128	0.0108634
Potra003440g21671	221.951	182.627	261.274	1.43065	0.516666	0.000972875	0.00844173
Potra000395g01831	761.178	626.205	896.151	1.43108	0.517106	0.00592982	0.0373952
Potra002276g17442	1219.71	1003.2	1436.21	1.43163	0.517657	2.31e-06	4.31e-05
Potra001229g10565	729.013	599.499	858.528	1.43208	0.518108	1.75e-05	0.000260671
Potra000620g04711	314.329	258.467	370.19	1.43225	0.518285	0.000197288	0.00219317
Potra004445g24927	1316.48	1082.5	1550.45	1.43228	0.518316	0.00690748	0.0421752
Potra001989g15651	328.804	270.332	387.277	1.4326	0.518631	0.00679134	0.0416473
Potra000291g01062	1898.81	1560.95	2236.68	1.43289	0.518932	1.61e-05	0.00024195
Potra001301g11196	1138.87	935.916	1341.83	1.4337	0.519747	2.47e-06	4.57e-05
Potra195727g29061	319.085	262.187	375.983	1.43403	0.520071	0.000174901	0.00197988
Potra000443g02451	307.009	252.252	361.766	1.43415	0.520191	0.000261151	0.00278841
Potra001966g15515	142.379	116.972	167.785	1.4344	0.52045	0.00110812	0.00941566
Potra001042g08813	202.141	166.039	238.242	1.43485	0.520903	0.00105226	0.00900695
Potra002839g20098	186.368	153.076	219.659	1.43497	0.521018	0.00560821	0.0358709
Potra001100g09586	647.143	531.37	762.917	1.43576	0.521811	0.000468552	0.00459409
Potra001251g10774	586.176	481.279	691.072	1.43591	0.521963	1.98e-05	0.000291298
Potra001311g11260	131.177	107.697	154.656	1.43604	0.522093	0.00165005	0.0131645
Potra001908g15143	89.5472	73.5174	105.577	1.43608	0.52214	0.00801408	0.0473429
Potra000404g01936	189.763	155.793	223.734	1.4361	0.52216	0.00074992	0.00677532
Potra001394g11855	532.021	436.774	627.269	1.43614	0.522199	2.51e-05	0.000358686
Potra001955g15443	446.852	366.839	526.865	1.43623	0.522287	1.44e-05	0.000219881
Potra003889g23359	133.959	109.964	157.954	1.43642	0.522473	0.00473192	0.0313987
Potra003811g22951	1010.27	829.282	1191.27	1.4365	0.522562	0.00201378	0.0155451
Potra003746g22667	178.918	146.858	210.979	1.43662	0.522678	0.000726291	0.00661119
Potra002449g18554	346.831	284.641	409.022	1.43697	0.523032	4.87e-05	0.000639753
Potra001097g09571	380.07	311.9	448.241	1.43713	0.523192	0.00764876	0.045601
Potra000349g01266	255.381	209.532	301.23	1.43763	0.523695	0.000105367	0.00126367
Potra001242g10673	158.717	130.212	187.222	1.43782	0.523887	0.00685425	0.0419455
Potra000470g02824	1272.57	1043.91	1501.24	1.43809	0.524156	1.4e-06	2.73e-05
Potra161695g26953	75.5858	62.004	89.1675	1.43809	0.524157	0.00795477	0.0470725
Potra003844g23107	249.933	205.01	294.856	1.43825	0.524311	0.000149224	0.00171929
Potra161150g26912	249.329	204.5	294.157	1.43842	0.524485	0.000261668	0.00279179
Potra001485g12394	145.949	119.703	172.194	1.43851	0.524573	0.00730239	0.0440072
Potra000832g06676	329.966	270.573	389.359	1.43902	0.525082	0.00158311	0.012721
Potra002679g19730	447.622	366.988	528.257	1.43944	0.525509	0.000746925	0.00675923
Potra001527g12696	148.328	121.595	175.06	1.4397	0.525766	0.00184452	0.0144999
Potra000838g06748	589.137	482.949	695.325	1.43975	0.525816	3.79e-05	0.000514161
Potra000994g08239	115.234	94.4637	136.005	1.43976	0.525831	0.00296634	0.0215085
Potra000980g08110	467.883	383.442	552.324	1.44044	0.526505	0.000421707	0.00420438
Potra000189g00777	1092.53	895.33	1289.72	1.4405	0.526571	3.91e-06	6.94e-05
Potra000694g05390	169.269	138.714	199.824	1.44054	0.526611	0.00256536	0.0190351
Potra115018g26599	176.484	144.621	208.347	1.44065	0.526718	0.00123484	0.0103268
Potra186711g28452	187.162	153.369	220.955	1.44068	0.526745	0.00158395	0.012721
Potra001489g12429	358.386	293.629	423.143	1.44108	0.527153	0.00012592	0.00147646
Potra002317g17670	333.513	273.223	393.802	1.44132	0.527395	0.000232957	0.00253007
Potra002497g18868	1359.9	1114.03	1605.77	1.4414	0.527472	1.12e-06	2.24e-05
Potra001721g14001	174.063	142.589	205.538	1.44147	0.527539	0.000714158	0.00651994
Potra001586g13124	397.792	325.838	469.745	1.44165	0.527722	6.6e-05	0.000842173
Potra001570g13002	146.934	120.356	173.512	1.44166	0.527731	0.0018513	0.0145423
Potra000169g00641	2365.47	1937.4	2793.53	1.4419	0.52797	3.02e-07	6.74e-06
Potra001958g15476	535.768	438.736	632.8	1.44233	0.528397	2.09e-05	0.00030512
Potra000927g07530	1452.13	1189.06	1715.2	1.44249	0.528563	7.31e-07	1.52e-05
Potra001673g13729	191.589	156.865	226.312	1.44272	0.528794	0.00156217	0.012575
Potra001039g08770	408.868	334.724	483.012	1.44301	0.529086	1.48e-05	0.000224982
Potra002918g20303	135.101	110.591	159.61	1.44324	0.529309	0.00341392	0.0241315
Potra006444g25686	1301.99	1065.57	1538.41	1.44375	0.529817	0.00680552	0.0417173
Potra196030g29078	1526.3	1249.01	1803.6	1.44402	0.530093	8.43e-05	0.00104066
Potra007483g25974	383.584	313.895	453.274	1.44403	0.530103	0.000676181	0.00623044
Potra002056g16035	799.75	654.355	945.145	1.44439	0.530462	0.00195754	0.0152249
Potra001976g15569	318.575	260.622	376.529	1.44473	0.530802	0.000155517	0.00178441
Potra001047g08880	924.192	756.01	1092.37	1.44492	0.530991	5.24e-05	0.000683757
Potra002334g17851	227.093	185.761	268.424	1.445	0.531071	0.0014182	0.0116314
Potra003648g22286	93.2729	76.2928	110.253	1.44513	0.5312	0.00699801	0.0426344
Potra001623g13349	361.804	295.912	427.696	1.44535	0.53142	0.00850593	0.0497119
Potra001257g10858	768.449	628.342	908.556	1.44596	0.532024	0.0023387	0.0175898
Potra000852g06897	3834.83	3135.6	4534.07	1.446	0.532064	1.27e-07	3e-06
Potra000300g01092	476.037	389.229	562.845	1.44605	0.53212	3.14e-05	0.000435716
Potra002965g20406	483.569	395.358	571.78	1.44623	0.532302	1.82e-05	0.000269368
Potra002078g16199	1184.88	968.516	1401.25	1.4468	0.532862	1.57e-06	3.02e-05
Potra000979g08102	621.947	508.31	735.583	1.44712	0.533181	6.41e-06	0.000108274
Potra009255g26314	610.046	498.508	721.584	1.44749	0.533551	0.000843916	0.00745046
Potra003978g23933	399.48	326.409	472.551	1.44772	0.533786	0.00202873	0.0156311
Potra002103g16351	5611.49	4584.98	6638	1.44777	0.533835	8.25e-08	2.01e-06
Potra001123g09908	89.2408	72.9007	105.581	1.44829	0.534346	0.00371624	0.0258355
Potra002848g20125	320.305	261.611	378.999	1.44871	0.534773	9.77e-05	0.00118093
Potra001661g13638	916.162	748.219	1084.1	1.44891	0.534972	0.0032072	0.0228912
Potra001040g08781	106.829	87.241	126.417	1.44906	0.535115	0.00204014	0.0157094
Potra000105g00354	3829.34	3127.13	4531.56	1.44911	0.535169	1.56e-07	3.64e-06
Potra001986g31568	168.626	137.663	199.589	1.44984	0.535889	0.000611849	0.00574223
Potra001858g14886	622.164	507.866	736.461	1.45011	0.536161	2.64e-05	0.000374429
Potra000678g05265	119.769	97.7634	141.775	1.45018	0.536236	0.00696658	0.0424801
[truncated: 1,750 more rows]

## Sheet: S3
S3: Gene list of genes whose expression is controlled by ethylene during TW formation.
Ethylene-dependent genes (n=859)
GeneID	Potri	ATG	WT_log2FC	WT_pAdj	pLMX5::etr1-1_log2FC	pLMX5::etr1-1_pAdj
Potra000178g00684	Potri.001G042900	AT5G48930	-0.511376	7.3448e-07	-0.350631	0.0120603
Potra001534g12735	Potri.003G183900	AT5G48930	-0.954914	9.57517e-23	-0.44453	0.000231911
Potra002819g20049	Potri.003G188500	AT3G21240	-2.49302	0.0152176	-0.46652	0.809998
Potra000606g04605	Potri.004G159300	AT4G34610	-0.503322	8.10506e-05	0.00174044	1
Potra000488g03037	Potri.007G076500	AT5G64740	0.616237	8.64054e-09	0.49375	0.000100799
Potra002559g19283	Potri.007G134500	AT1G17950	-1.11862	4.68979e-13	-0.412327	0.0662182
Potra000571g04228	Potri.012G006400	AT5G54160	-0.548655	2.83126e-07	-0.189606	0.292601
Potra182600g28240	Potri.013G157900	AT2G30490	-0.67879	2.00959e-05	-0.218127	0.472823
Potra000876g07066	Potri.001G001400	AT1G55535	0.653724	0.000883873	0.0602141	0.994228
Potra000876g07064	Potri.001G001600	AT5G56350	0.606764	3.60913e-08	0.472165	0.000347087
Potra168956g27395	Potri.001G004700	AT5G19790	#NAME?	0.0211582	-2.75554	0.29412
Potra002722g19837	Potri.001G004800	AT5G19820	0.596809	8.73553e-07	0.35501	0.0282409
Potra000941g07698	Potri.001G005700	AT4G25650	0.909999	0.00737462	0.590366	0.178238
Potra000941g07692	Potri.001G006500	AT3G13560	1.71546	0.0037146	1.22149	0.117253
Potra002060g16066	Potri.001G009600	AT1G69770	0.820169	0.0172822	0.587325	0.280151
Potra003275g21200	Potri.001G010500	AT3G58040	-0.860475	7.00171e-05	-0.157903	0.695846
Potra002067g16125	Potri.001G016900	AT5G10400	1.16054	0.00199192	0.51106	0.449137
Potra004040g24366	Potri.001G017000	AT4G12070	1.29831	5.13132e-06	0.219277	0.696907
Potra003898g23399	Potri.001G017100	AT5G12930	1.20083	0.00192056	1.05403	0.0628844
Potra001107g09681	Potri.001G020900	AT3G63440	-0.708079	0.0136882	-0.734028	0.0590226
Potra001107g09682	Potri.001G021000	AT5G13460	-1.00525	0.0118207	-0.0712869	1
Potra001107g09697	Potri.001G023600	AT3G13650	-2.47381	4.57424e-17	-0.683866	0.093472
Potra001813g14644	Potri.001G024500	AT1G63780	0.875517	0.0033553	0.670018	0.140286
Potra001813g14648	Potri.001G025100	AT3G54500	-0.597126	2.1503e-07	-0.462524	0.000319061
Potra192888g28839	Potri.001G026600	AT5G13810	-0.707838	1.1537e-06	-0.253004	0.259109
Potra003680g22412	Potri.001G027000	AT3G57040	0.871063	1.74579e-08	0.294835	0.218564
Potra001583g13093	Potri.001G027400	AT3G54440	0.552772	4.52881e-06	0.493746	0.00316048
Potra001583g13085	Potri.001G028300	AT1G08315	-0.680558	0.000561486	-0.302631	0.328722
Potra001583g13084	Potri.001G028400	AT3G54390	-0.805126	1.96199e-11	-0.418773	0.0060905
Potra000346g01228	Potri.001G030700	AT1G29940	0.631445	0.0171713	0.46945	0.32796
Potra001733g14099	Potri.001G031500	AT5G22130	0.61151	0.000140713	0.435902	0.0413464
Potra000135g00454	Potri.001G031700	AT5G09860	-0.54612	0.00685871	-0.410058	0.164029
Potra000542g03824	Potri.001G032500	AT5G07050	-1.62123	0.000664846	-0.949624	0.0924624
Potra001529g12703	Potri.001G034400	AT3G12390	0.881289	1.4176e-07	0.418449	0.0725131
Potra001319g11317	Potri.001G037000	AT5G23570	-0.97673	0.000314517	-0.395054	0.358549
Potra000930g07589	Potri.001G037700	AT5G57330	0.568833	0.00315213	0.413742	0.185473
Potra000930g07586	Potri.001G037900	AT1G79640	-1.46497	3.53322e-06	-0.579999	0.179599
Potra000178g00688	Potri.001G042500	AT2G24130	-1.38555	0.0018323	-0.35893	0.637617
Potra000178g00687	Potri.001G042600	AT3G12580	-4.33613	1.74931e-06	-1.48068	0.150805
Potra002123g16462	Potri.001G044200	AT1G80860	-1.74025	0.0133198	-1.60761	0.0583435
Potra002123g16469	Potri.001G044900	AT1G15960	-0.930618	0.00490948	-0.535413	0.296623
Potra004135g24582	Potri.001G046600	AT2G32060	1.10409	8.71945e-05	0.434486	0.340772
Potra004135g24589	Potri.001G047500	AT5G10970	0.600132	0.00409009	0.0540246	0.897649
Potra004135g24592	Potri.001G047800	AT1G80690	0.82244	0.0002463	0.415093	0.313893
Potra007434g25959	Potri.001G049100	AT1G78955	-0.635116	0.0396207	-0.468997	0.409619
Potra001665g13678	Potri.001G050100	AT2G02360	1.19619	0.0269207	1.49537	0.0860027
Potra001665g13688	Potri.001G051300	AT1G34010	-1.91146	0.012226	-0.42649	0.919478
Potra002350g17936	Potri.001G052500	AT3G24240	-1.19616	0.00471774	-1.08948	0.0694914
Potra002350g17941	Potri.001G053000	AT1G04650	-0.636733	0.00601279	-0.177204	0.716379
Potra001772g14412	Potri.001G056100	AT3G13060	0.519481	4.64532e-06	0.342078	0.0425362
Potra002201g16949	Potri.001G057800	AT1G67310	-0.81259	2.55193e-10	-0.47989	0.00652043
Potra003788g22863	Potri.001G058100	AT1G27290	-2.31301	0.00947267	-2.01864	0.0535819
Potra003788g22864	Potri.001G058200	AT2G03710	-1.05948	0.0130744	-1.19865	0.0691308
Potra002905g20275	Potri.001G059100	AT5G14090	1.63072	0.0162991	1.14394	0.192214
Potra001446g12171	Potri.001G059700	AT5G13100	0.685815	7.85595e-07	0.351836	0.0469835
Potra000586g04395	Potri.001G068200	AT5G13420	-0.715358	8.4065e-12	-0.314542	0.0386913
Potra000586g04390	Potri.001G068700	AT5G38895	-0.671018	2.45792e-06	-0.343752	0.0570133
Potra000380g01682	Potri.001G069100	AT3G61110	0.98232	0.000101542	0.0580965	1
Potra001414g11993	Potri.001G069500	AT1G76390	0.760876	0.0130111	0.0692973	0.934497
Potra001414g12000	Potri.001G070400	AT4G15755	-1.14981	0.00061307	-0.357267	0.57653
Potra001414g12001	Potri.001G070500	AT1G44900	0.78595	0.0043625	0.442598	0.311236
Potra001746g14234	Potri.001G071100	AT1G09690	0.568147	5.21664e-05	0.206636	0.30685
Potra001746g14236	Potri.001G071500	AT5G47900	2.62207	1.72823e-05	1.71022	0.0761371
Potra000728g05712	Potri.001G072800	AT3G46740	0.569086	0.000302798	0.389106	0.0663647
Potra000728g05710	Potri.001G073100	AT1G30820	0.828783	2.47185e-05	0.293192	0.406869
Potra000523g03544	Potri.001G073900	AT4G20260	-0.587598	5.28145e-05	-0.488858	0.00325129
Potra000523g03545	Potri.001G074000	AT5G44635	0.896278	0.00923677	0.651105	0.176652
Potra000523g32921	Potri.001G074300	AT4G20190	-1.66468	0.026389	-0.0567419	1
Potra003975g23911	Potri.001G075700	AT4G20090	-0.666411	0.000369827	-0.477593	0.0323869
Potra002475g18734	Potri.001G077400	NULL	-0.729345	0.000294088	-0.39569	0.213292
Potra002598g19516	Potri.001G084000	AT1G64660	1.41295	0.000755405	0.850861	0.148182
Potra001301g11198	Potri.001G087300	AT1G64550	0.524584	2.34232e-05	0.411554	0.00250121
Potra000931g07605	Potri.001G089500	AT5G42070	-2.12813	0.0294931	-0.509105	0.86416
Potra002606g19556	Potri.001G092700	AT2G19170	-3.13844	3.85183e-06	-1.44361	0.0853592
Potra001300g11185	Potri.001G093700	AT4G11080	1.08022	0.000760558	0.727161	0.127168
Potra000128g00419	Potri.001G095300	AT4G23730	-0.694811	0.0178961	-0.296124	0.579384
Potra006265g25634	Potri.001G095800	AT5G41670	0.891262	0.00757826	0.596098	0.163671
Potra002268g17395	Potri.001G096400	AT5G41610	-0.697223	0.000399431	-0.457187	0.185473
Potra001283g11069	Potri.001G097400	AT4G23650	-0.562571	7.07254e-05	-0.430726	0.0341885
Potra001283g11072	Potri.001G097700	AT4G11220	0.505875	3.045e-06	0.353296	0.0173865
Potra004564g25072	Potri.001G097800	AT4G23620	0.651744	0.0253379	0.484767	0.289063
Potra002134g16534	Potri.001G099700	AT1G63930	-0.572358	0.0484561	-0.12012	0.937359
Potra001459g12270	Potri.001G100200	AT5G52570	-3.96494	0.00241823	-2.9749	0.0955427
Potra000549g03942	Potri.001G102500	AT1G12770	2.14952	0.00575698	0.238253	0.949976
Potra002882g20224	Potri.001G106000	AT4G11640	-0.811225	0.00484757	-0.370309	0.445663
Potra001218g10520	Potri.001G106700	AT5G41140	1.10469	0.00838995	0.807518	0.0951566
Potra000868g06997	Potri.001G108800	AT4G23060	1.14463	0.000485049	0.731806	0.0816246
Potra001275g11028	Potri.001G109400	AT1G63100	1.35469	4.71898e-05	0.683263	0.183351
Potra001275g11025	Potri.001G109800	AT1G12710	0.652322	0.00322074	0.141223	0.818429
Potra001275g11021	Potri.001G110200	AT4G20360	0.665322	0.00999912	0.561052	0.122867
Potra001190g10306	Potri.001G111600	AT5G51920	1.59746	0.0396933	-0.16332	1
Potra001190g10307	Potri.001G111700	AT4G11820	-0.655501	7.69165e-06	-0.397586	0.0387173
Potra000820g06548	Potri.001G114400	AT4G22860	-1.0602	0.0360428	-1.00491	0.0993424
Potra003986g24010	Potri.001G114600	AT1G12450	-0.571273	4.2835e-05	-0.288467	0.174466
Potra003986g24006	Potri.001G115000	AT4G12040	0.517407	0.00030351	0.484218	0.0174199
Potra003985g24000	Potri.001G116500	AT4G12110	0.926578	8.34601e-05	0.555633	0.102081
Potra000506g03299	Potri.001G118100	AT5G59850	0.825579	7.0351e-05	0.245067	0.441994
Potra000052g00217	Potri.001G120200	AT2G45190	1.20995	0.00725715	0.731058	0.264574
Potra000723g05653	Potri.001G121300	AT2G30590	-0.863199	0.000106691	-0.549313	0.0578466
Potra000032g00161	Potri.001G123600	AT1G45332	0.760155	6.16845e-05	-0.0733692	1
Potra001089g09461	Potri.001G127100	AT5G45290	-0.53186	1.53785e-06	-0.419122	0.00171337
Potra001089g09463	Potri.001G127300	AT1G31650	-0.659017	0.000100894	0.0205896	1
Potra001089g09469	Potri.001G128200	AT5G45275	0.87541	1.15519e-09	0.477008	0.00457217
Potra160564g26869	Potri.001G130200	AT1G31812	0.818868	1.92447e-05	0.494845	0.0360823
Potra000166g00618	Potri.001G130400	AT3G61360	-0.787073	0.0329287	-0.126868	1
Potra000325g01141	Potri.001G131000	AT3G49010	0.743873	0.00055132	0.417007	0.147157
Potra000325g01140	Potri.001G131300	AT4G25030	-0.772389	0.0190731	-0.408493	0.347464
Potra000101g00338	Potri.001G133800	AT1G32090	0.61426	0.00013103	0.292787	0.251254
Potra002239g17201	Potri.001G136200	AT3G03050	-0.982116	6.54428e-08	-0.103068	0.811347
Potra002101g16344	Potri.001G138400	AT4G17720	0.533838	1.08509e-05	0.322299	0.0732187
Potra002101g16341	Potri.001G138800	AT1G32320	-1.59543	2.68858e-08	-0.611136	0.200978
Potra001307g11235	Potri.001G141100	AT5G46690	2.98435	4.27289e-07	1.2387	0.128544
Potra004450g24933	Potri.001G141400	AT5G46700	0.913801	0.00277958	0.749222	0.0513492
Potra003957g23752	Potri.001G142000	AT5G46740	1.48143	0.00174903	0.674973	0.304661
Potra003921g23528	Potri.001G143400	AT4G17840	-0.679677	0.00148444	-0.360127	0.390851
Potra001642g13482	Potri.001G145300	AT1G32440	0.752361	0.00997705	0.432787	0.368614
Potra001642g13484	Potri.001G145500	AT1G32370	0.566197	0.00178829	0.313741	0.349279
Potra003716g22540	Potri.001G147200	AT4G17030	0.916482	0.00278233	0.281284	0.816855
Potra003716g22537	Potri.001G147500	AT3G60190	1.13524	0.00853268	-0.0517232	1
Potra192292g28797	Potri.001G147700	AT1G14390	-0.830506	7.16682e-14	-0.393018	0.0179754
Potra002526g19060	Potri.001G148500	AT1G32730	-1.01627	0.0226379	0.325765	0.783756
Potra008949g26261	Potri.001G148700	AT4G17670	-0.974455	3.37428e-11	-0.2712	0.208107
Potra000958g07866	Potri.001G149300	AT3G10950	0.766309	7.49948e-05	0.319229	0.24241
Potra000409g02005	Potri.001G149800	AT5G47090	-0.710726	0.00298502	-0.333549	0.468364
Potra000511g03374	Potri.001G152500	AT5G02890	-0.536884	0.000583729	-0.243274	0.359324
Potra001124g09911	Potri.001G153000	AT4G17520	0.599506	6.69472e-05	0.438193	0.0215156
Potra001349g11583	Potri.001G154500	AT2G25410	-1.84086	3.32952e-13	-0.565753	0.137259
Potra195017g29007	Potri.001G157500	AT4G16640	-4.98358	0.0043625	-1.60418	0.492584
Potra000008g00036	Potri.001G159200	AT1G31040	-2.41515	0.000432805	-1.28645	0.0976603
Potra000008g00039	Potri.001G159600	AT2G35035	-0.53694	0.0303839	-0.304992	0.458455
Potra000008g00042	Potri.001G160100	AT4G20070	-0.716107	0.0252747	-0.61904	0.0754463
Potra001087g09435	Potri.001G161000	AT1G72300	-0.700238	2.56173e-05	0.0588616	1
Potra183245g28286	Potri.001G164000	AT1G72370	0.956573	1.66758e-05	0.547852	0.0703675
Potra000346g01237	Potri.001G164800	AT1G54070	-1.90667	0.00694351	-0.995681	0.251115
Potra001354g11606	Potri.001G166800	AT1G72500	-1.0518	0.000957821	-0.886596	0.0622298
Potra007587g25997	Potri.001G167800	AT5G07990	0.790217	0.0322612	0.240309	0.797083
Potra000621g04724	Potri.001G168200	AT1G54130	-0.630356	1.92171e-05	-0.368699	0.038338
Potra000619g04706	Potri.001G173500	AT1G15440	0.88461	0.0103109	0.761901	0.0638295
Potra003705g22495	Potri.001G173900	AT4G32440	-0.573042	0.000112423	-0.280089	0.266244
Potra001326g11397	Potri.001G177100	AT1G80370	1.13749	0.000679436	0.636659	0.212237
Potra001782g14497	Potri.001G178100	AT1G80420	-0.744944	0.048625	-0.162745	0.839867
Potra150280g26669	Potri.001G178500	AT1G15670	2.95658	7.19443e-05	1.42909	0.204218
Potra000392g01800	Potri.001G179000	AT3G15940	-0.614969	1.78996e-07	-0.232564	0.177834
Potra000554g03988	Potri.001G179400	AT3G15990	-1.62982	0.00295419	-0.771308	0.519741
Potra000410g02012	Potri.001G181300	AT1G79910	-1.69395	0.000101792	-0.372828	0.73229
Potra000410g02010	Potri.001G182000	AT1G79900	-1.87208	9.85123e-07	-0.826042	0.0655288
Potra000524g03573	Potri.001G183000	AT3G24550	-0.612112	0.0274418	-0.497362	0.245387
Potra000719g05631	Potri.001G183200	AT3G16080	0.63871	0.0416602	-0.0270976	1
Potra003688g22445	Potri.001G183700	AT1G79870	-0.942147	0.034718	-0.357012	0.743602
Potra002167g16730	Potri.001G185000	AT1G79830	0.549935	0.0085059	0.33786	0.247025
Potra188762g28638	Potri.001G185600	AT1G80560	0.651296	0.00314392	0.341276	0.233855
Potra001957g15455	Potri.001G190100	AT3G21360	-1.04224	0.00322618	-0.618486	0.175667
Potra002130g16507	Potri.001G190500	AT3G16490	1.63789	0.000930912	0.835257	0.23507
Potra000629g04805	Potri.001G191100	AT1G51980	0.533293	7.81035e-05	0.269411	0.0908081
Potra004107g24517	Potri.001G192200	AT3G15800	-1.04818	0.000304981	-0.583327	0.116789
Potra174613g27739	Potri.001G194000	AT2G19730	0.881525	5.25387e-05	0.528342	0.0851012
Potra000255g00991	Potri.001G199600	AT1G51720	-0.515491	0.00382231	-0.323151	0.121922
Potra003525g21897	Potri.001G204600	AT1G15760	0.553287	0.00158997	0.131	0.776242
Potra180495g28103	Potri.001G205400	AT4G33520	-1.7137	0.0327241	-0.391726	1
Potra001758g14309	Potri.001G206700	AT4G33430	-0.673311	4.24327e-06	-0.37222	0.036551
Potra005362g25372	Potri.001G209500	AT1G33270	-0.801523	0.015111	0.161363	0.938161
Potra009684g26407	Potri.001G210000	AT1G15820	-0.521799	0.0396933	-0.560147	0.0631135
Potra161849g35403	Potri.001G210100	AT5G64080	-0.827752	0.0125609	-0.897127	0.0613391
Potra003963g23793	Potri.001G210500	AT5G24690	-0.512875	0.00107995	-0.383192	0.0447553
Potra003963g23796	Potri.001G210900	AT1G09580	0.881177	1.61602e-07	0.351741	0.123571
Potra000112g00369	Potri.001G212400	AT2G27930	-1.36965	0.0329052	-0.550939	0.726417
Potra000318g01120	Potri.001G213700	AT2G27880	1.14515	8.89181e-05	0.705553	0.132772
Potra000384g01723	Potri.001G216900	AT2G27230	-0.51968	3.45607e-05	-0.279236	0.180659
Potra000039g00190	Potri.001G218100	AT3G44200	-0.510403	1.0854e-05	-0.216444	0.300487
Potra001295g11155	Potri.001G218700	AT3G52580	0.691226	0.00212685	0.184532	0.667497
Potra185545g28372	Potri.001G220800	AT5G21170	1.3487	2.77099e-06	0.527931	0.35459
Potra000474g02873	Potri.001G224700	AT5G12110	0.509219	0.000272856	0.357347	0.029193
Potra002801g20003	Potri.001G227000	AT2G44500	-0.504679	5.86428e-06	-0.358587	0.00977728
Potra000538g03780	Potri.001G229700	AT5G06710	0.654634	0.000373588	0.386602	0.210822
Potra000538g03784	Potri.001G230000	AT5G13000	-0.697514	5.49991e-12	-0.369803	0.00366383
Potra183383g28300	Potri.001G231500	AT2G44280	-2.75537	6.99918e-07	-1.48858	0.108296
Potra004013g24220	Potri.001G232500	AT2G44260	-2.52526	3.10758e-06	-1.10855	0.10746
Potra156286g26789	Potri.001G233300	AT3G45770	0.5843	0.00746163	0.285741	0.511412
Potra003098g20733	Potri.001G235700	AT5G59790	-1.20441	0.0010609	-0.451563	0.436774
Potra003440g21669	Potri.001G237100	AT2G39570	-0.842115	0.00741997	-0.802148	0.0696049
Potra161202g26919	Potri.001G237600	AT2G28790	3.48918	0.00014956	0.061686	1
Potra002198g16923	Potri.001G239100	AT2G45910	-0.949077	0.00871947	-0.962845	0.058382
Potra148461g26633	Potri.001G240000	AT5G24318	0.764119	0.0387336	0.137287	1
Potra002509g18940	Potri.001G240400	AT2G28930	-1.22052	1.06478e-06	-0.372083	0.306228
Potra000361g01459	Potri.001G240900	AT2G39700	0.854152	1.35406e-05	0.436842	0.139102
Potra010105g26486	Potri.001G241300	AT2G29050	0.541696	0.00176518	0.347927	0.164784
Potra003518g21878	Potri.001G242400	AT5G59500	0.82843	0.00104028	0.624949	0.0853482
Potra002084g16246	Potri.001G246100	AT3G09360	-0.543012	0.0462105	-0.115476	0.851955
Potra003776g22805	Potri.001G246200	AT5G59020	-0.982355	7.6048e-14	-0.464513	0.00808943
Potra003776g22806	Potri.001G246300	AT3G54020	-1.04084	0.0454499	-0.67052	0.399728
Potra003776g22807	Potri.001G246400	AT5G59010	-0.814879	2.48589e-05	-0.40401	0.25239
Potra003776g35749	Potri.001G246500	AT2G29530	0.611447	0.0459063	0.459998	0.439495
Potra003151g20857	Potri.001G247700	AT2G29570	0.693476	9.1072e-05	0.455189	0.0672961
Potra004091g24481	Potri.001G247800	AT5G58970	0.615145	9.62263e-07	0.424675	0.00509004
Potra004091g24483	Potri.001G248100	AT1G07350	-0.557705	0.0111736	-0.382473	0.176001
Potra003376g21489	Potri.001G250500	AT1G07230	-0.982016	1.65845e-08	-0.148816	0.878434
Potra002454g18587	Potri.001G251700	AT2G29960	0.5246	4.13042e-06	0.293941	0.0718681
Potra001100g09595	Potri.001G252000	AT1G07220	0.621527	0.00314455	0.431573	0.116391
Potra001075g09282	Potri.001G252600	AT5G58620	-0.569705	0.000552947	-0.275994	0.446034
Potra003827g23017	Potri.001G253100	AT4G38730	-0.519809	0.00731327	-0.316518	0.184687
Potra001405g11932	Potri.001G253300	AT2G13360	-1.07622	0.00554617	-0.499596	0.447164
Potra003178g20907	Potri.001G254500	AT1G50490	1.30436	0.000341629	0.823236	0.11711
Potra002691g19766	Potri.001G256000	AT1G51450	0.604837	0.0205221	0.497335	0.124435
Potra002330g17822	Potri.001G258500	AT4G13650	2.49089	0.00116833	1.02808	0.323807
Potra002330g17818	Potri.001G258900	AT1G50920	0.723472	0.000505508	0.478925	0.118238
Potra001902g15107	Potri.001G260900	AT3G63460	0.527491	4.358e-06	0.41807	0.00275848
Potra001902g15106	Potri.001G261000	AT3G60910	-0.567901	0.00019789	-0.439831	0.0378475
Potra001518g12643	Potri.001G262200	AT5G12470	-0.738368	0.000174839	-0.152595	0.896165
Potra001518g12641	Potri.001G262600	AT5G15920	-0.626085	0.00184031	-0.202067	0.577088
Potra001972g15555	Potri.001G264000	AT3G23890	1.18445	9.87354e-06	0.700083	0.0502627
Potra001972g15546	Potri.001G265300	AT2G28305	-1.24741	0.000792294	-0.444455	0.499672
Potra001312g11279	Potri.001G267200	AT3G08490	-0.577446	0.0149875	-0.204476	0.6227
Potra002106g16374	Potri.001G267300	AT3G08500	-1.24839	0.00954668	-0.978555	0.175081
Potra195236g29028	Potri.001G268000	NULL	-2.25579	0.0374824	-0.505258	1
Potra002358g31817	Potri.001G268500	NULL	1.37506	2.62308e-05	0.418447	0.433452
Potra000701g05465	Potri.001G270800	AT1G12740	3.22849	0.0468481	1.08513	1
Potra000405g01966	Potri.001G271500	AT1G74050	0.833672	4.39251e-06	0.348839	0.197205
Potra003177g20902	Potri.001G272000	AT2G26760	1.34918	0.000112633	0.679944	0.209955
Potra003179g20910	Potri.001G274900	AT5G13530	-0.880518	1.5705e-12	-0.295026	0.134734
Potra002376g18101	Potri.001G275300	AT4G29070	-0.807032	0.00669724	-0.59383	0.112237
Potra003558g22018	Potri.001G278900	AT2G30060	0.509996	7.87821e-07	0.389312	0.00261717
Potra003558g22019	Potri.001G279000	AT1G07120	-0.745321	1.70482e-12	-0.270233	0.0708746
Potra004866g25197	Potri.001G279700	AT5G58575	-0.605636	0.00511835	-0.222919	0.632173
Potra000829g06646	Potri.001G286000	AT5G64460	-0.652491	4.04877e-05	-0.41643	0.0613245
Potra004127g32553	Potri.001G286800	NULL	-1.64698	0.00664322	-0.241223	0.83036
Potra003266g21173	Potri.001G287800	AT4G17000	1.18648	0.0126097	0.545777	0.771111
Potra000550g03956	Potri.001G289100	AT2G16270	1.41169	5.63076e-07	0.745659	0.0618291
Potra001282g11066	Potri.001G289300	AT3G22960	0.511348	0.0139208	0.52383	0.0811432
Potra002233g17163	Potri.001G289800	AT1G44910	-0.643152	0.00261702	-0.38443	0.250197
Potra000366g01501	Potri.001G293400	AT2G14750	-2.23438	0.0229719	-1.2553	0.647216
Potra000417g02127	Potri.001G295900	AT4G33865	0.677538	0.000510422	0.346172	0.199838
Potra001850g14840	Potri.001G297900	AT2G18990	0.759769	0.0479542	-0.125067	1
Potra001866g14928	Potri.001G298700	AT1G24625	-1.35193	4.28956e-05	-0.714278	0.0535495
Potra002991g20483	Potri.001G298800	AT2G15000	1.25363	6.57412e-05	0.672032	0.103036
Potra001866g14931	Potri.001G299000	AT4G34260	-1.45435	0.0101367	-1.15529	0.0760407
Potra001069g09220	Potri.001G300200	AT4G37260	2.34123	0.00429216	0.923361	0.674836
Potra194336g28946	Potri.001G301400	AT2G15320	-0.921238	0.00215542	-0.473844	0.279269
Potra002248g17275	Potri.001G301800	AT4G34160	0.785672	0.00218058	0.485106	0.185396
Potra194020g31503	Potri.001G302800	NULL	-2.93362	0.00347153	-1.96621	0.0912343
Potra001264g10919	Potri.001G303900	AT4G36910	-0.568633	0.0325578	-0.314099	0.35678
Potra001264g10920	Potri.001G304000	AT1G49760	0.500336	8.56825e-06	0.354946	0.00904547
Potra000446g02495	Potri.001G309000	AT3G18800	1.56585	0.00836145	1.11558	0.154131
Potra000446g02496	Potri.001G309100	AT1G76890	-0.923573	0.0137469	-1.04541	0.0601333
Potra004185g24671	Potri.001G309700	AT1G49230	-1.68941	0.0091404	-0.0880746	1
Potra001328g11413	Potri.001G310100	AT2G14095	-1.46065	0.0271831	-0.41216	0.668034
Potra002501g18885	Potri.001G314000	AT5G48820	-0.523081	0.00731507	-0.283669	0.438047
Potra002501g18891	Potri.001G314700	AT1G04900	0.693882	0.0452372	0.741417	0.0941198
Potra003977g23926	Potri.001G317900	AT3G23910	-0.560854	7.19443e-05	-0.347237	0.0540946
Potra000882g07122	Potri.001G319900	AT4G13850	1.0718	1.21784e-05	0.657035	0.0500713
Potra002915g20298	Potri.001G320200	AT4G13870	-1.46877	0.0298149	-0.756266	0.620821
Potra182302g28215	Potri.001G320500	AT4G13940	-0.558489	0.000645825	-0.105824	0.96561
Potra000308g01106	Potri.001G321300	AT4G14010	-0.589389	0.00837667	-0.41977	0.179384
Potra165170g27208	Potri.001G323600	AT5G14020	-2.45423	5.15912e-06	-0.995034	0.234879
Potra003690g22454	Potri.001G324300	AT5G64670	1.05288	0.0172235	0.234929	0.749768
Potra002319g31769	Potri.001G328800	AT3G27030	-0.632191	0.0378017	-0.480174	0.427525
Potra003055g20634	Potri.001G330000	AT3G48200	0.948063	0.0398352	0.691645	0.391642
Potra000458g02649	Potri.001G331500	AT3G27150	-0.662538	0.00113088	-0.484049	0.0881305
Potra000458g02644	Potri.001G331900	AT3G27180	-0.675836	0.00357543	-0.193665	0.820093
Potra000458g02641	Potri.001G332300	AT5G14180	0.636782	0.00069165	0.219399	0.618472
Potra003348g21412	Potri.001G332800	AT3G01840	0.550476	0.0141633	0.327539	0.36288
Potra001448g12191	Potri.001G333100	AT3G01820	0.766334	0.000194788	-0.0715729	1
Potra002779g19957	Potri.001G333600	AT5G14230	-0.557565	6.31296e-06	-0.209404	0.430458
Potra009031g26278	Potri.001G335100	AT5G14280	-0.709422	0.000343349	-0.506047	0.0531959
Potra193144g28858	Potri.001G335700	AT5G40770	0.65442	0.000648538	0.47276	0.0271344
Potra001041g08787	Potri.001G336300	AT3G01710	0.923411	0.0390563	0.745701	0.2491
Potra001900g15102	Potri.001G336700	AT5G14340	-3.07143	0.0175354	-2.44795	0.217162
Potra001681g13753	Potri.001G337400	AT5G40760	-0.842687	9.85445e-18	-0.496069	4.6e-05
Potra001075g09294	Potri.001G338000	AT3G27325	0.529002	1.30814e-06	0.471303	0.000311449
Potra000664g05134	Potri.001G338400	AT5G40650	0.513265	7.50983e-06	0.38574	0.00391612
Potra000387g01754	Potri.001G341100	AT5G20890	0.75433	1.68034e-06	0.360662	0.0634673
Potra000381g01692	Potri.001G342500	AT4G15000	0.952567	6.69137e-07	0.508897	0.0586416
Potra000381g01702	Potri.001G343800	AT3G01600	0.926112	0.0176537	0.555495	0.496498
Potra002270g17410	Potri.001G346200	AT3G27820	-0.61477	0.000427079	-0.322526	0.202581
Potra000737g05810	Potri.001G348200	AT3G27730	1.20734	0.0380584	0.465966	0.85024
Potra001151g10019	Potri.001G348800	AT3G27925	-0.506036	0.0279713	-0.146672	0.728642
Potra001151g10023	Potri.001G349100	AT3G27870	-1.03437	0.0251982	-0.667258	0.233267
Potra173898g27681	Potri.001G352200	AT4G18210	-1.80584	0.00829753	-0.235808	0.944333
Potra000496g03169	Potri.001G353500	AT1G29390	-0.792123	4.04597e-06	-0.418164	0.295492
Potra003459g21736	Potri.001G353900	AT4G18100	0.641269	0.00828302	0.168818	0.713913
Potra003036g20587	Potri.001G354500	AT1G29520	Inf	0.00205501	2.16489	0.143297
Potra003036g20588	Potri.001G354600	AT1G29530	0.570579	3.29685e-05	0.338069	0.0854097
Potra010016g26471	Potri.001G354900	AT4G18050	-1.0679	4.44057e-14	-0.423186	0.0425802
Potra000536g03748	Potri.001G356400	AT4G22320	-0.892972	0.0123017	-0.279442	0.617308
Potra000505g03280	Potri.001G357200	AT3G20330	0.710286	0.00199393	0.274195	0.579769
Potra000833g06682	Potri.001G358100	AT4G21070	1.50669	0.00441599	0.428054	0.771192
Potra008446g26164	Potri.001G364000	AT3G13110	-0.635821	0.0121356	-0.258791	0.585336
Potra001146g09982	Potri.001G365600	AT3G13120	0.641094	0.0458648	0.408708	0.408168
Potra002204g16968	Potri.001G366300	AT1G55900	0.523187	0.00507383	0.252598	0.353703
Potra002204g16970	Potri.001G366700	AT3G13170	-0.85517	0.0355581	-0.330509	0.737227
Potra181319g28147	Potri.001G367500	AT4G14540	-1.55835	0.0303646	-0.926729	0.609234
Potra001029g08634	Potri.001G367900	AT5G55730	0.811182	0.000150001	0.489455	0.0692987
Potra001284g11074	Potri.001G369300	AT4G26620	-0.539678	0.00162703	-0.270108	0.397651
Potra001284g11076	Potri.001G369500	AT1G60620	0.853398	0.0338912	0.672812	0.202237
Potra001284g11077	Potri.001G369600	AT4G26600	0.650617	0.0302091	0.424863	0.365902
Potra001284g11080	Potri.001G370000	AT5G55940	0.695854	3.46969e-07	0.448963	0.00668336
Potra004227g24706	Potri.001G370200	AT5G55940	0.658616	0.00404248	0.169457	0.824412
Potra001492g12450	Potri.001G370500	AT5G55960	-0.533824	0.014472	-0.369502	0.123827
Potra004170g24654	Potri.001G374100	AT5G54080	0.635202	0.000327198	0.377819	0.224728
Potra000574g04265	Potri.001G376400	AT1G06230	-0.76735	0.000943787	-0.418268	0.300199
Potra001422g12037	Potri.001G376800	AT1G17780	-0.900863	0.0262593	-0.201973	0.98609
Potra002145g16602	Potri.001G377900	AT1G78430	0.903337	4.3339e-09	0.405529	0.045601
Potra003849g23144	Potri.001G381500	AT1G79450	-1.07633	0.0417014	-0.739864	0.330813
Potra003849g23146	Potri.001G381700	AT1G17020	-0.883689	0.00209532	-0.701248	0.0634364
Potra002380g18122	Potri.001G382400	AT1G17020	2.52241	2.98449e-06	0.715728	0.591915
Potra003052g20630	Potri.001G383600	AT1G78580	-0.56453	0.0124799	-0.210087	0.62344
Potra197450g29226	Potri.001G388800	NULL	2.52277	6.88087e-06	1.03107	0.109528
Potra001003g08351	Potri.001G390200	AT1G53320	-0.766709	9.31275e-06	-0.38579	0.0952499
Potra000632g04825	Potri.001G391400	AT1G31860	0.669051	0.0491814	0.278891	0.756459
Potra001040g08783	Potri.001G393800	AT3G14440	1.40721	7.51205e-08	-0.100907	0.941519
Potra001029g08638	Potri.001G394500	AT3G14410	0.601735	0.00551603	0.265887	0.450446
Potra006403g25671	Potri.001G395200	AT2G20562	-1.7008	0.00363893	-1.30519	0.0579176
Potra002461g31872	Potri.001G398400	NULL	-1.49826	0.0324487	-1.08657	0.33833
Potra002461g18654	Potri.001G398500	AT5G53890	-0.505252	0.00512049	-0.0393619	1
Potra000239g00948	Potri.001G400300	AT1G53025	-0.58142	0.000324849	-0.282083	0.256995
Potra000239g00949	Potri.001G400400	NULL	0.921651	0.013223	0.760478	0.0941198
Potra001557g12888	Potri.001G402800	AT3G15430	-0.812563	7.60109e-10	-0.4914	0.00405092
Potra003485g21802	Potri.001G403000	AT4G27450	0.881669	0.0020148	-0.217342	0.652847
Potra000396g32466	Potri.001G404500	AT3G15518	-2.24331	0.0320096	-1.99891	0.13307
Potra000743g05860	Potri.001G406000	AT4G27220	-0.681328	6.87247e-05	-0.46263	0.0338578
Potra003356g21437	Potri.001G406700	AT5G54290	-1.18499	0.0100058	-0.375647	0.861842
Potra003356g21436	Potri.001G406900	AT4G27380	0.861999	9.58633e-05	0.243866	0.595171
Potra003061g20652	Potri.001G407100	AT5G54270	-0.787637	0.00540616	-0.311947	0.42069
Potra003791g22873	Potri.001G409800	AT5G54580	0.6101	0.0269747	0.0368949	1
Potra003950g23721	Potri.001G410500	AT5G54520	-0.557537	0.0311131	-0.651898	0.0814146
Potra001522g12664	Potri.001G412000	AT4G27290	-0.894778	0.0343359	0.225977	0.879926
Potra000573g04261	Potri.001G412100	AT4G27290	-2.65956	9.8189e-05	-1.39089	0.174446
Potra000677g05250	Potri.001G412900	AT4G34240	-0.833842	0.000839382	-0.534267	0.132391
Potra172432g27590	Potri.001G416400	AT3G01440	1.08181	0.00235386	0.27168	0.985567
Potra172432g27591	Potri.001G416500	AT1G11530	1.13538	0.0186373	-0.200832	0.819204
Potra004293g24782	Potri.001G416800	AT5G54690	-0.807709	5.02727e-17	-0.391859	0.00192357
Potra197017g29172	Potri.001G418100	AT4G27290	-2.22428	0.00105296	-0.941374	0.24536
Potra001147g09993	Potri.001G418500	AT4G05320	-0.519916	0.000259046	-0.201915	0.50315
Potra000756g05963	Potri.001G418800	AT3G20480	-0.914592	0.0406775	-0.426355	0.694555
Potra160408g26854	Potri.001G420700	AT5G54840	-0.526693	0.00219831	-0.247106	0.459913
Potra003128g20812	Potri.001G423300	AT5G54910	0.700306	0.0163022	0.758313	0.0559352
Potra000175g00658	Potri.001G423600	AT4G27010	0.606811	0.0230753	0.626241	0.0528565
Potra001711g13928	Potri.001G424900	AT2G34520	0.746735	0.00191693	0.117769	0.90216
Potra000806g06399	Potri.001G437400	AT1G78380	-1.82289	0.00403041	-0.449787	0.761523
Potra003940g23655	Potri.001G439100	AT1G79120	-1.26089	0.00718838	-0.816432	0.296706
Potra006070g25556	Potri.001G440300	AT4G20430	0.878156	0.00256137	0.466761	0.230867
Potra001266g10946	Potri.001G442500	AT5G44560	0.931591	0.0241893	0.436195	0.462318
Potra000118g00384	Potri.001G444500	AT4G27190	-0.785402	0.00045631	-0.574799	0.091471
Potra002004g15733	Potri.001G448300	AT4G10630	0.669014	0.0445345	0.432605	0.462783
Potra000491g03100	Potri.001G450100	AT1G64720	-0.533138	0.00354809	-0.186022	0.566698
Potra001437g12098	Potri.001G450600	AT1G32960	-0.831485	2.16366e-11	-0.329279	0.102284
Potra169527g27449	Potri.001G452500	AT1G33055	-2.32912	7.60007e-05	-1.55368	0.057396
Potra004220g24699	Potri.001G452700	AT1G33060	-0.604739	0.0455678	-0.769916	0.053728
Potra001780g14485	Potri.001G453500	AT5G15940	-0.662248	0.0156379	-0.489527	0.384739
Potra001780g14480	Potri.001G454000	AT1G33140	0.941509	0.000711952	0.482969	0.208223
Potra000678g05257	Potri.001G455500	AT5G06740	-1.814	0.0464585	-1.24584	0.38094
Potra004439g24923	Potri.001G455900	AT3G51510	0.898839	9.11467e-06	0.09919	0.916747
Potra174177g27698	Potri.001G456400	AT1G76520	1.04801	0.0180277	0.769468	0.190684
Potra000648g04964	Potri.001G461100	AT2G44510	0.860905	0.0303343	0.615529	0.224277
Potra000715g05607	Potri.001G464400	AT5G62690	0.512887	1.31214e-06	0.407934	0.00269672
Potra000559g04053	Potri.001G466100	AT4G33990	-1.1738	0.0483171	-0.835668	0.376646
Potra003902g23430	Potri.001G467400	AT3G13226	-1.07142	0.000722381	-0.764701	0.0651263
Potra000987g08160	Potri.001G468100	AT4G26530	-1.10583	0.00593581	-0.762281	0.120004
Potra002351g34829	Potri.001G469700	AT5G56090	-1.71573	0.00116652	-1.2301	0.190752
Potra001917g15216	Potri.002G003400	AT1G76540	1.45717	0.000325152	0.555291	0.416184
Potra001917g31457	Potri.002G004200	NULL	-1.27331	0.0333141	-0.445443	0.822354
Potra002472g18714	Potri.002G006300	AT1G20830	-0.953861	0.00736471	-0.544991	0.299151
Potra002472g18715	Potri.002G006400	AT1G76410	-0.999399	3.78848e-05	-0.41639	0.307653
Potra000216g00896	Potri.002G007300	AT5G24318	0.693639	6.11107e-06	0.477047	0.012637
Potra000653g05030	Potri.002G009000	AT1G20696	-0.60758	1.22084e-09	-0.428638	0.000552514
Potra004625g25133	Potri.002G010000	AT1G76310	1.1927	0.00169795	0.725147	0.218318
Potra001730g14085	Potri.002G010600	AT1G20560	0.618493	0.0308483	0.136714	1
Potra001730g14077	Potri.002G011400	AT1G76250	-0.930558	1.84212e-05	-0.488828	0.129306
Potra002970g20421	Potri.002G012500	AT4G35190	0.990271	0.000987115	0.141413	0.910641
Potra001864g14906	Potri.002G013400	AT5G42250	0.729869	0.000827041	0.198589	0.730991
Potra001864g14904	Potri.002G013600	AT1G20430	0.887513	0.00727482	-0.0402835	1
Potra003775g22800	Potri.002G015400	AT4G38470	-0.539512	0.00565132	-0.430757	0.116321
Potra002551g31929	Potri.002G016500	AT1G76070	-0.824396	2.12531e-08	-0.481183	0.00639777
Potra177003g35433	Potri.002G016900	AT3G56150	0.609254	9.63078e-05	0.459639	0.00583894
Potra000625g04760	Potri.002G018600	AT1G20160	-1.4578	2.21747e-11	-0.440887	0.175011
Potra001707g13913	Potri.002G020800	AT2G17880	1.77033	0.0016582	1.1851	0.155906
Potra195134g29017	Potri.002G021400	AT1G30755	-2.0161	0.00290973	-0.726528	0.585642
Potra002067g16111	Potri.002G030900	AT1G75430	2.18378	0.000593147	0.268135	0.990084
Potra002641g19636	Potri.002G034100	AT1G19580	0.550514	1.48134e-05	0.420975	0.00665137
Potra002641g19638	Potri.002G034300	AT5G42785	-3.95297	3.0628e-09	-0.919579	0.205377
Potra001872g14961	Potri.002G035900	AT1G03950	-0.685538	0.00859393	-0.236372	0.73996
Potra182508g28230	Potri.002G043800	AT1G55190	2.46141	0.0245285	1.08356	0.286994
Potra001803g14593	Potri.002G044800	AT3G54650	0.725506	0.000263579	0.425673	0.0897479
Potra001803g14598	Potri.002G045400	AT4G02590	-0.847741	1.60745e-11	-0.490605	0.00218822
Potra000544g03848	Potri.002G046800	AT5G20030	-0.859268	0.00111724	-0.654869	0.0904175
Potra003093g32089	Potri.002G047800	AT5G19840	1.35839	0.00127455	1.08469	0.108364
Potra000668g05172	Potri.002G048300	AT4G02680	-0.735024	4.32486e-11	-0.462053	0.000593987
Potra000668g05171	Potri.002G048500	AT4G14720	-0.735774	1.71107e-06	-0.480254	0.0067572
Potra008321g26140	Potri.002G048600	AT5G04700	-1.00386	1.52015e-13	-0.394639	0.0192069
Potra001824g35740	Potri.002G049700	AT3G22750	-0.633845	1.70376e-05	-0.358554	0.0804832
Potra168112g27338	Potri.002G050400	AT3G22600	-2.01082	2.02709e-18	-0.397096	0.32497
Potra175727g27826	Potri.002G050800	AT3G22550	0.899337	0.022954	0.28968	0.801676
Potra000372g01575	Potri.002G052100	AT4G02780	-3.36992	0.00422603	-2.23772	0.103036
Potra000492g03129	Potri.002G052600	AT3G63200	-0.585776	0.0185867	-0.107153	1
Potra002458g18634	Potri.002G053100	AT4G02800	0.912744	0.00636767	0.477513	0.380795
Potra161548g30990	Potri.002G054700	AT3G52420	-0.915789	3.58021e-07	-0.481779	0.0292749
Potra161549g26946	Potri.002G054800	AT4G02840	0.662578	0.00219962	0.164662	0.759096
Potra007752g26017	Potri.002G055000	AT5G37020	-0.532253	0.000211893	-0.295533	0.187474
Potra001181g10235	Potri.002G056200	AT2G32060	0.959831	4.00201e-07	0.280832	0.375143
Potra000696g05410	Potri.002G057900	AT4G18260	0.545626	1.05899e-05	0.217801	0.317108
Potra001334g30755	Potri.002G060100	AT3G58850	0.770124	0.00103535	0.280212	0.541533
Potra003261g21151	Potri.002G061400	AT1G14290	-0.512345	0.000477012	-0.293395	0.166495
Potra003261g21152	Potri.002G061500	AT4G02450	0.545823	0.000179997	0.125549	0.6565
Potra003261g21156	Potri.002G062100	AT5G36120	1.54404	0.00808609	0.917925	0.535513
Potra001224g10547	Potri.002G062500	AT1G31340	-0.648392	0.0380043	-0.59021	0.1302
Potra003365g21458	Potri.002G063700	AT4G09760	-0.719819	0.000385038	-0.444415	0.128736
Potra009201g26306	Potri.002G065200	AT4G09890	-1.86636	0.00227138	-1.08582	0.149081
Potra006285g25640	Potri.002G066900	AT1G43580	0.511029	0.0351699	0.421694	0.193335
Potra002128g31652	Potri.002G068100	NULL	-1.4185	1.37961e-05	-0.44894	0.264905
Potra002041g15948	Potri.002G069500	AT1G43700	-0.515131	0.000384894	-0.272464	0.185053
Potra002041g15947	Potri.002G069800	AT1G43710	1.02928	2.87722e-06	0.490261	0.097319
Potra002228g17119	Potri.002G071400	AT1G77220	-0.685859	9.32507e-09	-0.486228	0.00121377
Potra002228g31708	Potri.002G072000	AT1G43790	-1.04228	0.00410724	-0.374635	0.699211
Potra003612g22170	Potri.002G072200	AT1G77110	0.956646	0.00364493	0.655193	0.178581
Potra169235g27420	Potri.002G076200	AT1G21510	1.78231	1.53718e-05	1.10487	0.0655114
Potra001744g14217	Potri.002G076700	AT1G77230	-0.672776	0.0270209	-0.515636	0.132692
Potra010034g35580	Potri.002G079500	AT1G77380	-2.85109	9.41158e-05	-1.71141	0.421917
Potra008025g26082	Potri.002G079700	AT1G77380	-2.4771	1.79317e-14	-0.799224	0.194394
Potra001077g09301	Potri.002G082500	AT1G21760	-0.568855	0.0218685	-0.385431	0.187318
Potra002842g20105	Potri.002G083400	AT1G77580	-0.647916	0.0107986	-0.173422	0.784317
Potra001721g14010	Potri.002G084900	AT1G44770	-0.627996	0.00917606	-0.481883	0.0760407
Potra002741g19882	Potri.002G086900	AT4G36020	-1.96527	1.41664e-06	-0.692706	0.297896
Potra000733g05779	Potri.002G088700	AT4G08460	0.542	3.94425e-06	0.283083	0.0860169
Potra001911g15155	Potri.002G090300	AT1G22030	-0.586515	2.54559e-05	-0.0304686	1
Potra001206g10443	Potri.002G090600	AT1G77930	-0.527133	0.0458035	-0.077729	0.919724
Potra001206g10425	Potri.002G092500	AT1G22150	0.638522	0.0267877	0.501864	0.184227
Potra160498g26859	Potri.002G093100	AT4G08685	0.640146	8.72263e-05	0.271791	0.240706
Potra003255g21138	Potri.002G093300	AT1G22170	-0.891359	1.18556e-07	-0.446191	0.0657431
Potra000855g06924	Potri.002G093800	AT1G53710	-0.699768	0.00209308	-0.56025	0.0705378
Potra002052g16008	Potri.002G094600	AT1G78100	-0.754797	0.0249139	-0.365396	0.46576
Potra000003g00022	Potri.002G094900	AT1G35830	-0.527218	0.0174731	-0.20321	0.656848
Potra002186g16837	Potri.002G096100	AT1G78170	-2.24869	2.99946e-06	-1.22738	0.0667914
Potra000891g07196	Potri.002G097800	AT1G78230	-1.6984	0.00213022	0.130593	1
Potra002057g16047	Potri.002G099500	AT5G10360	0.831074	0.000390098	0.508738	0.108158
Potra002057g16050	Potri.002G099800	AT1G78300	0.518076	3.28934e-07	0.355086	0.00511766
Potra002449g18556	Potri.002G100600	AT4G40060	1.44925	0.0211682	0.142284	1
[truncated: 2,674 more rows]

## Sheet: S4
S4: GO/PFAM enrichment of ET-dependent genes.
[truncated: 80 more rows]

[truncated: 4 more sheets: S5, S6, S7, S8]
